# Supplementary material for: Experimental Assessment of Leptomeningeal Metastasis Diagnosis in Medulloblastoma Using Cerebrospinal Fluid Metabolomic Profiles
Source: Metabolites. 2021 Dec 7;11(12):851. doi: 10.3390/metabo11120851 (PMC8708677; doi:10.3390/metabo11120851)
Supplement: Supplementary file 1 [file metabolites-11-00851-s001.zip › Metabolites_Table S1.xlsx]

## Sheet: MBL_CSF_supplementary_table
Supplementary table 1. Sampling conditions of 83 CSF samples
ID	Gender	Age	Time to operation(op)	Time to radiation (RT)	Time to chemotherapy(Tx)	CSF sample site	CSF cytology	LM on MRI	LM symptom & sign	Included in data anaylsis
6	male	21	postop	post-RT	during chemoTx	Lumbar	atypical	evident	negative	Included
14	male	5.8	postop	post-RT	chemo-off 1.5 yr	Lumbar	negative	negative	negative	Included
15	male	5.9	postop	post-RT	post-chemoTx	Lumbar	negative	negative	negative	Included
17	male	7.2	postop	post-RT	post-chemoTx	Lumbar	negative	negative	negative	Included
18	male	6.9	postop	post-RT	post-chemoTx	Lumbar	negative	negative	negative	Included
22	male	5.9	postop	post-RT	during chemoTx	Lumbar	atypical	negative	negative	Included
23	male	6.2	postop	post-RT	during chemoTx	Lumbar	atypical	negative	negative	Included
24	female	12.8	postop	post-RT	during chemoTx	Lumbar	negative	negative	negative	Included
26	female	14.8	postop	post-RT	during chemoTx	Lumbar	atypical	negative	negative	Included
27	female	17.9	postop	post-RT	during chemoTx	Lumbar	negative	negative	negative	Included
28	female	18	postop	post-RT	post-chemoTx	Lumbar	suggestive	negative	negative	Included
29	female	18.2	postop	post-RT	pre-chemoTx	Lumbar	atypical	negative	negative	Included
30	female	18.2	postop	post-RT	during chemoTx	Lumbar	negative	negative	negative	Included
33	female	13.4	postop	pre-RT	during chemoTx	Intraventricular	positive	evident	evident	Included
34	male	12.6	postop	pre-RT	pre-chemoTx	Lumbar	positive	equivocal	negative	Included
35	male	12.7	postop	pre-RT	post-chemoTx	Lumbar	atypical	negative	negative	Included
36	male	12.8	postop	during RT	during chemoTx	Lumbar	suggestive	negative	negative	Included
37	female	9.1	postop	pre-RT	not available	Lumbar	atypical	suggestive	negative	Included
42	male	6.1	postop	pre-RT	pre-chemoTx	Lumbar	atypical	negative	negative	Included
44	male	8.8	postop	post-RT	during chemoTx	Lumbar	suggestive	suggestive	negative	Included
46	female	9.2	postop	pre-RT	post-chemoTx	Lumbar	atypical	evident	negative	Included
47	male	24	postop	post-RT	chemo-off 4.2 yr	Lumbar	negative	evident	negative	Included
48	male	24.1	postop	post-RT	chemo-off 4.2 yr	Lumbar	negative	evident	negative	Included
50	male	10.1	postop	pre-RT	pre-chemoTx	Lumbar	negative	negative	negative	Included
51	female	18.2	post-RT	post-RT	post-chemoTx	Lumbar	negative	evident	evident	Included
52	female	18.2	post-RT	post-RT	post-chemoTx	Intraventricular	atypical	evident	evident	Included
54	female	9.9	postop	post-RT	post-chemoTx	Lumbar	negative	negative	negative	Included
57	female	11.3	postop	post-RT	during chemoTx	Lumbar	atypical	negative	negative	Included
58	female	12	postop	post-RT	during chemoTx	Lumbar	negative	negative	negative	Included
59	female	5.2	postop	post-RT	pre-chemoTx	Lumbar	negative	negative	negative	Included
62	male	9.9	preop	pre-RT	pre-chemoTx	Intraventricular	negative	evident	negative	Included
63	male	10.1	intraop	pre-RT	pre-chemoTx	Intraventricular	negative	negative	negative	Included
64	female	6.2	preop	pre-RT	pre-chemoTx	Intraventricular	negative	negative	negative	Included
65	male	15	intraop	pre-RT	pre-chemoTx	Intraventricular	negative	negative	negative	Included
66	female	10.3	intraop	pre-RT	pre-chemoTx	Intraventricular	negative	negative	negative	Included
67	male	10.8	intraop	pre-RT	pre-chemoTx	Intraventricular	negative	negative	negative	Included
68	male	18.1	postop	pre-RT	pre-chemoTx	Lumbar	negative	evident	negative	Included
69	male	3.6	intraop	pre-RT	pre-chemoTx	Intraventricular	negative	suggestive	negative	Included
70	female	15.3	intraop	not available	not available	Intraventricular	not available	negative	negative	Included
71	female	12.9	intraop	pre-RT	pre-chemoTx	Intraventricular	negative	negative	negative	Included
76	male	8	postop	pre-RT	pre-chemoTx	Lumbar	atypical	not available	negative	Included
77	female	8	postop	post-RT	chemo-off 0.8 yr	Lumbar	negative	negative	negative	Included
78	female	18.4	postop	post-RT	during chemoTx	Intraventricular	atypical	evident	evident	Included
80	female	18.7	postop	post-RT	post-chemoTx	Lumbar	negative	evident	evident	Included
82	female	7.6	postop	post-RT	during chemoTx	Lumbar	atypical	negative	negative	Included
83	female	7.8	postop	post-RT	during chemoTx	Cisternal	Atypical-NSE weakly(+)	negative	negative	Included
84	female	8	postop	post-RT	during chemoTx	Lumbar	negative	negative	negative	Included
85	female	8.2	postop	post-RT	during chemoTx	Lumbar	negative	negative	negative	Included
86	male	19.6	postop	pre-RT	pre-chemoTx	Intraventricular	positive	evident	evident	Included
87	male	19.4	postop	pre-RT	pre-chemoTx	Intraventricular	positive	evident	evident	Included
88	male	20.1	postop	post-RT	during chemoTx	Intraventricular	negative	evident	suggestive	Included
89	female	2.8	postop	pre-RT	post-chemoTx	Lumbar	negative	negative	negative	Included
90	female	24.4	postop	pre-RT	pre-chemoTx	Lumbar	positive	negative	negative	Included
91	female	24.4	postop	pre-RT	pre-chemoTx	Lumbar	negative	negative	negative	Included
92	female	24.4	postop	pre-RT	pre-chemoTx	Lumbar	atypical	negative	negative	Included
93	female	24.4	postop	during RT	during chemoTx	Cisternal	atypical	negative	negative	Included
94	female	24.5	postop	post-RT	during chemoTx	Lumbar	negative	negative	negative	Included
95	female	24.5	postop	post-RT	during chemoTx	not available	suggestive	negative	negative	Included
96	female	24.5	postop	post-RT	during chemoTx	Lumbar	suggestive	negative	negative	Included
97	female	24.6	postop	post-RT	during chemoTx	Cisternal	suggestive	negative	negative	Included
98	female	24.7	postop	post-RT	during chemoTx	Lumbar	negative	negative	negative	Included
99	female	24.7	postop	post-RT	during chemoTx	Lumbar	atypical	negative	negative	Included
100	female	24.7	postop	post-RT	during chemoTx	Lumbar	atypical	negative	negative	Included
102	female	13	postop	pre-RT	pre-chemoTx	Lumbar	negative	negative	negative	Included
103	female	5.3	postop	pre-RT	pre-chemoTx	Lumbar	atypical	negative	negative	Included
104	female	5.3	postop	pre-RT	pre-chemoTx	Lumbar	negative	negative	negative	Included
106	female	11.4	postop	pre-RT	pre-chemoTx	Lumbar	positive	suggestive	suggestive	Included
107	male	12.8	postop	post-RT	during chemoTx	Intraventricular	suggestive	evident	evident	Included
112	female	2.9	postop	pre-RT	pre-chemoTx	Lumbar	negative	negative	negative	Included
113	female	7.1	postop	pre-RT	pre-chemoTx	Lumbar	atypical	negative	negative	Included
114	male	19.1	postop	pre-RT	pre-chemoTx	Lumbar	atypical	negative	negative	Included
115	female	3.1	postop	skip RT	during chemoTx	Lumbar	negative	negative	negative	Included
116	male	3.6	intraop	not available	not available	Cisternal	atypical	evident	negative	Included
117	female	2.8	intraop	pre-RT	pre-chemoTx	Intraventricular	negative	evident	evident	Included
118	female	3.9	intraop	not available	not available	Intraventricular	positive	negative	negative	Included
119	female	6.8	intraop	pre-RT	pre-chemoTx	Intraventricular	suggestive	evident	negative	Included
120	female	11.3	intraop	pre-RT	pre-chemoTx	Intraventricular	negative	suggestive	negative	Included
121	male	6.9	intraop	pre-RT	pre-chemoTx	Cisternal	negative	negative	negative	Included
122	female	10.6	intraop	pre-RT	pre-chemoTx	Intraventricular	negative	evident	negative	Included
123	female	7.2	intraop	pre-RT	pre-chemoTx	Lumbar	negative	negative	negative	Included
124	male	12.1	intraop	post-RT	post-chemoTx	Intraventricular	atypical	evident	negative	Included
125	male	6.2	preop	pre-RT	pre-chemoTx	Intraventricular	atypical	evident	evident	Included
126	female	7.1	postop	post-RT	post-chemoTx	Intraventricular	negative	suggestive	negative	Included
