# Supplementary material for: Experimental Assessment of Leptomeningeal Metastasis Diagnosis in Medulloblastoma Using Cerebrospinal Fluid Metabolomic Profiles
Source: Metabolites. 2021 Dec 7;11(12):851. doi: 10.3390/metabo11120851 (PMC8708677; doi:10.3390/metabo11120851)
Supplement: Supplementary file 1 [file metabolites-11-00851-s001.zip › Metabolites_Table S2.xlsx]

## Sheet: Supplementary Table 2A
Mass value (m/z)	Retention time (min)	Sensitivity	Specificity	Discrimination threshold	Zero flag	Overall pattern
193.094	8.45	1	0.680851	3.56	1	MRI(+)/cytology(+)>MRI(-)/cytology(-)
486.111	16.01	0.875	0.787234	4.76	1	MRI(+)/cytology(+)>MRI(-)/cytology(-)
283.176	7.81	1	0.659574	3.23	1	MRI(+)/cytology(+)>MRI(-)/cytology(-)
305.156	7.82	1	0.659574	3.03	1	MRI(+)/cytology(+)>MRI(-)/cytology(-)
484.777	22.99	1	0.659574	4.46	1	MRI(+)/cytology(+)>MRI(-)/cytology(-)
157.016	22.92	0.875	0.765957	4.52	1	MRI(+)/cytology(+)>MRI(-)/cytology(-)
68.9835	22.85	1	0.638298	4.43	1	MRI(+)/cytology(+)>MRI(-)/cytology(-)
123.084	18.15	1	0.638298	4.7	1	MRI(+)/cytology(+)>MRI(-)/cytology(-)
137.07	1.7	1	0.638298	4.12	1	MRI(+)/cytology(+)>MRI(-)/cytology(-)
285.211	7.81	1	0.638298	3.185	1	MRI(+)/cytology(+)>MRI(-)/cytology(-)
520.339	13.33	1	0.638298	4.91	1	MRI(+)/cytology(+)<MRI(-)/cytology(-)
133.105	2.31	0.75	0.87234	3.71	1	MRI(+)/cytology(+)>MRI(-)/cytology(-)
193.094	8.56	0.75	0.87234	3.38	1	MRI(+)/cytology(+)>MRI(-)/cytology(-)
116.07	2.29	0.875	0.744681	3.7	1	MRI(+)/cytology(+)>MRI(-)/cytology(-)
363.2	8.17	0.875	0.744681	3.04	1	MRI(+)/cytology(+)>MRI(-)/cytology(-)
102.129	13.39	1	0.617021	5.27	1	MRI(+)/cytology(+)<MRI(-)/cytology(-)
118.086	2.14	1	0.617021	4.575	1	MRI(+)/cytology(+)>MRI(-)/cytology(-)
124.087	18.16	1	0.617021	4.895	1	MRI(+)/cytology(+)>MRI(-)/cytology(-)
297.242	15.82	1	0.617021	5.095	1	MRI(+)/cytology(+)>MRI(-)/cytology(-)
429.32	15.72	1	0.617021	4.53	1	MRI(+)/cytology(+)>MRI(-)/cytology(-)
121.084	7.84	0.75	0.851064	4.38	1	MRI(+)/cytology(+)>MRI(-)/cytology(-)
295.19	13.12	0.75	0.851064	4.28	1	MRI(+)/cytology(+)>MRI(-)/cytology(-)
333.277	16.35	0.75	0.851064	5.16	1	MRI(+)/cytology(+)>MRI(-)/cytology(-)
372.233	9.23	0.75	0.851064	3.2	1	MRI(+)/cytology(+)<MRI(-)/cytology(-)
378.901	1.65	0.75	0.851064	5.28	1	MRI(+)/cytology(+)<MRI(-)/cytology(-)
446.888	1.57	0.75	0.851064	5.43	1	MRI(+)/cytology(+)<MRI(-)/cytology(-)
528.309	13.64	0.75	0.851064	3.085	1	MRI(+)/cytology(+)<MRI(-)/cytology(-)
82.0538	18.78	0.875	0.723404	3.205	1	MRI(+)/cytology(+)<MRI(-)/cytology(-)
282.28	16.67	0.875	0.723404	5.85	1	MRI(+)/cytology(+)>MRI(-)/cytology(-)
485.113	16.06	0.875	0.723404	5.125	1	MRI(+)/cytology(+)>MRI(-)/cytology(-)
554.178	17.25	0.875	0.723404	4.79	1	MRI(+)/cytology(+)>MRI(-)/cytology(-)
145.954	22.98	1	0.595745	5.06	1	MRI(+)/cytology(+)>MRI(-)/cytology(-)
184.984	23.02	1	0.595745	4.79	1	MRI(+)/cytology(+)>MRI(-)/cytology(-)
198.073	8.47	1	0.595745	2.585	0	MRI(+)/cytology(+)>MRI(-)/cytology(-)
214.917	22.94	1	0.595745	6.38	1	MRI(+)/cytology(+)>MRI(-)/cytology(-)
302.305	10.4	0.625	0.957447	5.495	1	MRI(+)/cytology(+)>MRI(-)/cytology(-)
303.309	10.42	0.625	0.957447	4.89	1	MRI(+)/cytology(+)>MRI(-)/cytology(-)
102.127	2.32	0.75	0.829787	5.095	1	MRI(+)/cytology(+)<MRI(-)/cytology(-)
149.023	15	0.75	0.829787	4.765	1	MRI(+)/cytology(+)<MRI(-)/cytology(-)
186.22	8.96	0.75	0.829787	2.72	1	MRI(+)/cytology(+)<MRI(-)/cytology(-)
311.294	16.27	0.75	0.829787	4.84	1	MRI(+)/cytology(+)>MRI(-)/cytology(-)
319.225	13.94	0.75	0.829787	4.885	1	MRI(+)/cytology(+)>MRI(-)/cytology(-)
615.351	9.06	0.75	0.829787	2.255	1	MRI(+)/cytology(+)<MRI(-)/cytology(-)
636.422	9.98	0.75	0.829787	2.325	1	MRI(+)/cytology(+)<MRI(-)/cytology(-)
653.411	8.93	0.75	0.829787	2.625	0	MRI(+)/cytology(+)<MRI(-)/cytology(-)
82.9975	23.41	0.875	0.702128	5.24	1	MRI(+)/cytology(+)>MRI(-)/cytology(-)
123.079	16.38	0.875	0.702128	4.33	1	MRI(+)/cytology(+)>MRI(-)/cytology(-)
129.978	22.93	0.875	0.702128	4.27	1	MRI(+)/cytology(+)>MRI(-)/cytology(-)
226.18	11.34	0.875	0.702128	3.35	1	MRI(+)/cytology(+)<MRI(-)/cytology(-)
283.283	16.66	0.875	0.702128	5.035	1	MRI(+)/cytology(+)>MRI(-)/cytology(-)
309.203	15.69	0.875	0.702128	4.96	1	MRI(+)/cytology(+)>MRI(-)/cytology(-)
337.233	17.07	0.875	0.702128	5.135	1	MRI(+)/cytology(+)>MRI(-)/cytology(-)
364.218	10.15	0.875	0.702128	3.17	1	MRI(+)/cytology(+)>MRI(-)/cytology(-)
409.853	22.94	0.875	0.702128	4.54	1	MRI(+)/cytology(+)>MRI(-)/cytology(-)
509.213	9.26	0.875	0.702128	2.15	1	MRI(+)/cytology(+)>MRI(-)/cytology(-)
702.861	21.27	0.875	0.702128	1.175	0	MRI(+)/cytology(+)<MRI(-)/cytology(-)
91.013	22.9	1	0.574468	4.48	1	MRI(+)/cytology(+)>MRI(-)/cytology(-)
102.129	20.51	1	0.574468	5.315	1	MRI(+)/cytology(+)<MRI(-)/cytology(-)
102.129	9.34	1	0.574468	5.16	1	MRI(+)/cytology(+)<MRI(-)/cytology(-)
102.129	22.9	1	0.574468	4.935	1	MRI(+)/cytology(+)<MRI(-)/cytology(-)
143.996	22.99	1	0.574468	4.47	1	MRI(+)/cytology(+)>MRI(-)/cytology(-)
482.266	9.04	1	0.574468	3.86	1	MRI(+)/cytology(+)<MRI(-)/cytology(-)
86.0972	2.3	0.625	0.93617	3.625	1	MRI(+)/cytology(+)>MRI(-)/cytology(-)
132.101	2.31	0.625	0.93617	4.39	1	MRI(+)/cytology(+)>MRI(-)/cytology(-)
132.102	2.28	0.625	0.93617	4.4	1	MRI(+)/cytology(+)>MRI(-)/cytology(-)
68.995	24.07	0.75	0.808511	4.93	1	MRI(+)/cytology(+)>MRI(-)/cytology(-)
191.077	1.61	0.75	0.808511	4.3	1	MRI(+)/cytology(+)>MRI(-)/cytology(-)
217.104	17.16	0.75	0.808511	5.28	1	MRI(+)/cytology(+)>MRI(-)/cytology(-)
227.201	13.06	0.75	0.808511	4.875	1	MRI(+)/cytology(+)>MRI(-)/cytology(-)
249.182	13.01	0.75	0.808511	5.25	1	MRI(+)/cytology(+)>MRI(-)/cytology(-)
258.28	10.44	0.75	0.808511	5.04	1	MRI(+)/cytology(+)>MRI(-)/cytology(-)
258.28	10.53	0.75	0.808511	4.475	1	MRI(+)/cytology(+)<MRI(-)/cytology(-)
351.2	9.13	0.75	0.808511	3.47	1	MRI(+)/cytology(+)>MRI(-)/cytology(-)
125.97	23	0.875	0.680851	4.77	1	MRI(+)/cytology(+)>MRI(-)/cytology(-)
158.154	12.31	0.875	0.680851	4.22	1	MRI(+)/cytology(+)<MRI(-)/cytology(-)
286.199	8.6	0.875	0.680851	2.28	0	MRI(+)/cytology(+)>MRI(-)/cytology(-)
293.142	8.79	0.875	0.680851	3.53	1	MRI(+)/cytology(+)>MRI(-)/cytology(-)
329.227	13.05	0.875	0.680851	4.72	1	MRI(+)/cytology(+)<MRI(-)/cytology(-)
371.1	17.29	0.875	0.680851	4.765	1	MRI(+)/cytology(+)>MRI(-)/cytology(-)
385.292	15.8	0.875	0.680851	4.885	1	MRI(+)/cytology(+)>MRI(-)/cytology(-)
485.217	10.28	0.875	0.680851	2.35	1	MRI(+)/cytology(+)>MRI(-)/cytology(-)
853.727	19.89	0.875	0.680851	3.96	1	MRI(+)/cytology(+)>MRI(-)/cytology(-)
1093.46	1.54	0.875	0.680851	4.19	1	MRI(+)/cytology(+)<MRI(-)/cytology(-)
59.0517	17.8	1	0.553191	4.81	1	MRI(+)/cytology(+)>MRI(-)/cytology(-)
102.128	20.49	1	0.553191	5.6	1	MRI(+)/cytology(+)<MRI(-)/cytology(-)
174.186	9.28	1	0.553191	2.575	1	MRI(+)/cytology(+)<MRI(-)/cytology(-)
297.241	15.78	1	0.553191	4.64	1	MRI(+)/cytology(+)>MRI(-)/cytology(-)
321.071	9.43	1	0.553191	2.71	0	MRI(+)/cytology(+)>MRI(-)/cytology(-)
341.267	15.78	1	0.553191	4.97	1	MRI(+)/cytology(+)>MRI(-)/cytology(-)
374.305	16.12	1	0.553191	4.75	1	MRI(+)/cytology(+)>MRI(-)/cytology(-)
872.832	1.51	1	0.553191	4.74	1	MRI(+)/cytology(+)<MRI(-)/cytology(-)
1008.81	1.46	1	0.553191	4.095	1	MRI(+)/cytology(+)<MRI(-)/cytology(-)
154.086	8	0.625	0.914894	3.33	1	MRI(+)/cytology(+)>MRI(-)/cytology(-)
171.112	8.45	0.625	0.914894	4.005	1	MRI(+)/cytology(+)>MRI(-)/cytology(-)
213.146	11.33	0.625	0.914894	3.915	1	MRI(+)/cytology(+)<MRI(-)/cytology(-)
217.104	16.52	0.625	0.914894	5.425	1	MRI(+)/cytology(+)>MRI(-)/cytology(-)
303.309	10.38	0.625	0.914894	4.68	1	MRI(+)/cytology(+)>MRI(-)/cytology(-)
526.294	13.3	0.625	0.914894	4.47	1	MRI(+)/cytology(+)<MRI(-)/cytology(-)
566.319	13.35	0.625	0.914894	3.37	1	MRI(+)/cytology(+)<MRI(-)/cytology(-)
102.126	14.55	0.75	0.787234	4.495	1	MRI(+)/cytology(+)<MRI(-)/cytology(-)
129.055	2.09	0.75	0.787234	4.27	1	MRI(+)/cytology(+)>MRI(-)/cytology(-)
239.123	8.38	0.75	0.787234	3.25	1	MRI(+)/cytology(+)>MRI(-)/cytology(-)
257.147	2.13	0.75	0.787234	3.425	1	MRI(+)/cytology(+)>MRI(-)/cytology(-)
258.882	22.96	0.75	0.787234	4.065	1	MRI(+)/cytology(+)>MRI(-)/cytology(-)
320.253	13.3	0.75	0.787234	4.06	1	MRI(+)/cytology(+)>MRI(-)/cytology(-)
337.236	17.21	0.75	0.787234	5.56	1	MRI(+)/cytology(+)>MRI(-)/cytology(-)
385.117	8.79	0.75	0.787234	2.51	1	MRI(+)/cytology(+)>MRI(-)/cytology(-)
387.269	13.66	0.75	0.787234	4.3	1	MRI(+)/cytology(+)<MRI(-)/cytology(-)
403.113	2.14	0.75	0.787234	3.035	1	MRI(+)/cytology(+)>MRI(-)/cytology(-)
425.216	15.47	0.75	0.787234	5.265	1	MRI(+)/cytology(+)>MRI(-)/cytology(-)
487.807	22.94	0.75	0.787234	4.155	1	MRI(+)/cytology(+)>MRI(-)/cytology(-)
500.37	14.67	0.75	0.787234	3.44	1	MRI(+)/cytology(+)<MRI(-)/cytology(-)
530.321	14.36	0.75	0.787234	3.34	1	MRI(+)/cytology(+)<MRI(-)/cytology(-)
636.421	8.92	0.75	0.787234	3.09	1	MRI(+)/cytology(+)<MRI(-)/cytology(-)
773.494	12.58	0.75	0.787234	2.26	1	MRI(+)/cytology(+)<MRI(-)/cytology(-)
854.804	1.57	0.75	0.787234	5.15	1	MRI(+)/cytology(+)<MRI(-)/cytology(-)
69.0337	2.16	0.875	0.659574	4.275	1	MRI(+)/cytology(+)>MRI(-)/cytology(-)
82.9977	23.99	0.875	0.659574	4.44	1	MRI(+)/cytology(+)>MRI(-)/cytology(-)
102.127	19.74	0.875	0.659574	5.57	1	MRI(+)/cytology(+)<MRI(-)/cytology(-)
123.079	16.05	0.875	0.659574	4.02	1	MRI(+)/cytology(+)<MRI(-)/cytology(-)
161.096	14.67	0.875	0.659574	3.94	1	MRI(+)/cytology(+)<MRI(-)/cytology(-)
235.885	22.98	0.875	0.659574	4.53	1	MRI(+)/cytology(+)>MRI(-)/cytology(-)
331.248	12.18	0.875	0.659574	4.62	1	MRI(+)/cytology(+)<MRI(-)/cytology(-)
460.279	9.88	0.875	0.659574	4.015	1	MRI(+)/cytology(+)<MRI(-)/cytology(-)
462.864	1.57	0.875	0.659574	4.01	1	MRI(+)/cytology(+)<MRI(-)/cytology(-)
476.306	9.88	0.875	0.659574	4.9	1	MRI(+)/cytology(+)<MRI(-)/cytology(-)
482.266	9.87	0.875	0.659574	3.84	1	MRI(+)/cytology(+)<MRI(-)/cytology(-)
504.307	9.91	0.875	0.659574	3.93	1	MRI(+)/cytology(+)<MRI(-)/cytology(-)
520.335	13.31	0.875	0.659574	4.96	1	MRI(+)/cytology(+)<MRI(-)/cytology(-)
592.36	9.98	0.875	0.659574	3.08	1	MRI(+)/cytology(+)<MRI(-)/cytology(-)
592.381	9.41	0.875	0.659574	3.355	1	MRI(+)/cytology(+)<MRI(-)/cytology(-)
613.346	9.27	0.875	0.659574	3.9	1	MRI(+)/cytology(+)<MRI(-)/cytology(-)
702.862	21.32	0.875	0.659574	1.355	0	MRI(+)/cytology(+)<MRI(-)/cytology(-)
884.161	1.63	0.875	0.659574	4.64	1	MRI(+)/cytology(+)>MRI(-)/cytology(-)
59.0516	18.44	1	0.531915	4.975	1	MRI(+)/cytology(+)>MRI(-)/cytology(-)
59.0516	19.74	1	0.531915	5.25	1	MRI(+)/cytology(+)>MRI(-)/cytology(-)
60.0463	18.21	1	0.531915	4.765	1	MRI(+)/cytology(+)>MRI(-)/cytology(-)
82.0137	22.94	1	0.531915	4.3	1	MRI(+)/cytology(+)>MRI(-)/cytology(-)
121.085	7.66	1	0.531915	4.12	1	MRI(+)/cytology(+)>MRI(-)/cytology(-)
130.958	23.44	1	0.531915	4.98	1	MRI(+)/cytology(+)>MRI(-)/cytology(-)
136.021	20.13	1	0.531915	4.67	1	MRI(+)/cytology(+)>MRI(-)/cytology(-)
147.065	2.09	1	0.531915	3.53	1	MRI(+)/cytology(+)>MRI(-)/cytology(-)
200.236	10.41	1	0.531915	3.43	1	MRI(+)/cytology(+)<MRI(-)/cytology(-)
239.15	20.51	1	0.531915	4.865	1	MRI(+)/cytology(+)<MRI(-)/cytology(-)
280.263	15.73	1	0.531915	4.63	1	MRI(+)/cytology(+)>MRI(-)/cytology(-)
329.236	8.47	1	0.531915	3.525	1	MRI(+)/cytology(+)>MRI(-)/cytology(-)
710.848	1.59	1	0.531915	4.67	1	MRI(+)/cytology(+)<MRI(-)/cytology(-)
861.503	1.71	1	0.531915	4.435	1	MRI(+)/cytology(+)>MRI(-)/cytology(-)
948.804	1.54	1	0.531915	4.74	1	MRI(+)/cytology(+)<MRI(-)/cytology(-)
175.058	2.1	0.625	0.893617	4.215	1	MRI(+)/cytology(+)<MRI(-)/cytology(-)
203.151	1.81	0.625	0.893617	4.055	1	MRI(+)/cytology(+)>MRI(-)/cytology(-)
214.253	10.09	0.625	0.893617	4.82	1	MRI(+)/cytology(+)>MRI(-)/cytology(-)
226.952	19.5	0.625	0.893617	1.8	1	MRI(+)/cytology(+)<MRI(-)/cytology(-)
258.282	10.4	0.625	0.893617	4.555	1	MRI(+)/cytology(+)>MRI(-)/cytology(-)
302.305	10.38	0.625	0.893617	5.22	1	MRI(+)/cytology(+)>MRI(-)/cytology(-)
394.873	1.57	0.625	0.893617	3.545	1	MRI(+)/cytology(+)<MRI(-)/cytology(-)
524.271	13.35	0.625	0.893617	3.015	1	MRI(+)/cytology(+)<MRI(-)/cytology(-)
637.417	9.03	0.625	0.893617	2.035	1	MRI(+)/cytology(+)<MRI(-)/cytology(-)
796.838	8.24	0.625	0.893617	3.705	1	MRI(+)/cytology(+)>MRI(-)/cytology(-)
799.851	8.24	0.625	0.893617	3.59	1	MRI(+)/cytology(+)>MRI(-)/cytology(-)
800.849	8.24	0.625	0.893617	3.68	1	MRI(+)/cytology(+)>MRI(-)/cytology(-)
102.129	8.53	0.75	0.765957	4.56	1	MRI(+)/cytology(+)<MRI(-)/cytology(-)
125.987	23	0.75	0.765957	5.62	1	MRI(+)/cytology(+)>MRI(-)/cytology(-)
167.07	13.16	0.75	0.765957	4.2	1	MRI(+)/cytology(+)<MRI(-)/cytology(-)
191.039	1.88	0.75	0.765957	4.89	1	MRI(+)/cytology(+)<MRI(-)/cytology(-)
194.079	8.88	0.75	0.765957	2.74	1	MRI(+)/cytology(+)>MRI(-)/cytology(-)
198.94	22.89	0.75	0.765957	5.51	1	MRI(+)/cytology(+)>MRI(-)/cytology(-)
201.054	2.15	0.75	0.765957	4.42	1	MRI(+)/cytology(+)>MRI(-)/cytology(-)
217.104	17.26	0.75	0.765957	5.43	1	MRI(+)/cytology(+)>MRI(-)/cytology(-)
223.062	11.78	0.75	0.765957	4.09	1	MRI(+)/cytology(+)<MRI(-)/cytology(-)
227.2	13.06	0.75	0.765957	4.95	1	MRI(+)/cytology(+)>MRI(-)/cytology(-)
269.249	14.95	0.75	0.765957	4.51	1	MRI(+)/cytology(+)<MRI(-)/cytology(-)
298.351	11.55	0.75	0.765957	3.06	1	MRI(+)/cytology(+)>MRI(-)/cytology(-)
427.245	16.26	0.75	0.765957	4.93	1	MRI(+)/cytology(+)>MRI(-)/cytology(-)
460.284	9.32	0.75	0.765957	4.04	1	MRI(+)/cytology(+)<MRI(-)/cytology(-)
520.339	13.35	0.75	0.765957	4.895	1	MRI(+)/cytology(+)<MRI(-)/cytology(-)
527.294	13.3	0.75	0.765957	3.895	1	MRI(+)/cytology(+)<MRI(-)/cytology(-)
853.723	17.35	0.75	0.765957	4.13	1	MRI(+)/cytology(+)>MRI(-)/cytology(-)
82.0524	18.83	0.875	0.638298	3.085	0	MRI(+)/cytology(+)<MRI(-)/cytology(-)
87.925	23.4	0.875	0.638298	5.77	1	MRI(+)/cytology(+)>MRI(-)/cytology(-)
88.9333	23.51	0.875	0.638298	5.83	1	MRI(+)/cytology(+)>MRI(-)/cytology(-)
100.931	23.47	0.875	0.638298	5.11	1	MRI(+)/cytology(+)>MRI(-)/cytology(-)
102.129	19.08	0.875	0.638298	5.115	1	MRI(+)/cytology(+)<MRI(-)/cytology(-)
102.129	16.66	0.875	0.638298	5.63	1	MRI(+)/cytology(+)<MRI(-)/cytology(-)
102.129	21.61	0.875	0.638298	5.6	1	MRI(+)/cytology(+)<MRI(-)/cytology(-)
102.129	13.48	0.875	0.638298	5.56	1	MRI(+)/cytology(+)<MRI(-)/cytology(-)
102.129	8.48	0.875	0.638298	4.255	1	MRI(+)/cytology(+)<MRI(-)/cytology(-)
103.13	19.88	0.875	0.638298	4.51	1	MRI(+)/cytology(+)<MRI(-)/cytology(-)
118.087	2.34	0.875	0.638298	4.07	1	MRI(+)/cytology(+)>MRI(-)/cytology(-)
118.966	22.98	0.875	0.638298	4.67	1	MRI(+)/cytology(+)>MRI(-)/cytology(-)
123.099	19.36	0.875	0.638298	4.52	1	MRI(+)/cytology(+)>MRI(-)/cytology(-)
123.967	23.51	0.875	0.638298	5.36	1	MRI(+)/cytology(+)>MRI(-)/cytology(-)
145.016	22.95	0.875	0.638298	4.78	1	MRI(+)/cytology(+)>MRI(-)/cytology(-)
188.07	8.73	0.875	0.638298	2.495	0	MRI(+)/cytology(+)>MRI(-)/cytology(-)
193.094	8.18	0.875	0.638298	3.53	1	MRI(+)/cytology(+)>MRI(-)/cytology(-)
202.216	9.32	0.875	0.638298	3.74	1	MRI(+)/cytology(+)<MRI(-)/cytology(-)
214.251	10.67	0.875	0.638298	3.66	1	MRI(+)/cytology(+)<MRI(-)/cytology(-)
216.914	22.91	0.875	0.638298	4.975	1	MRI(+)/cytology(+)>MRI(-)/cytology(-)
258.244	14.21	0.875	0.638298	5	1	MRI(+)/cytology(+)>MRI(-)/cytology(-)
277.18	12.29	0.875	0.638298	4.92	1	MRI(+)/cytology(+)>MRI(-)/cytology(-)
285.288	9.97	0.875	0.638298	3.5	1	MRI(+)/cytology(+)<MRI(-)/cytology(-)
300.204	7.62	0.875	0.638298	2.87	1	MRI(+)/cytology(+)>MRI(-)/cytology(-)
308.113	9.13	0.875	0.638298	2.68	1	MRI(+)/cytology(+)>MRI(-)/cytology(-)
329.231	12.99	0.875	0.638298	4.39	1	MRI(+)/cytology(+)<MRI(-)/cytology(-)
409.312	17.23	0.875	0.638298	3.98	1	MRI(+)/cytology(+)>MRI(-)/cytology(-)
427.242	16.62	0.875	0.638298	4.755	1	MRI(+)/cytology(+)>MRI(-)/cytology(-)
503.304	9.91	0.875	0.638298	3.98	1	MRI(+)/cytology(+)<MRI(-)/cytology(-)
559.13	17.32	0.875	0.638298	4.39	1	MRI(+)/cytology(+)>MRI(-)/cytology(-)
565.359	9.95	0.875	0.638298	3.42	1	MRI(+)/cytology(+)<MRI(-)/cytology(-)
585.312	8.28	0.875	0.638298	3.38	1	MRI(+)/cytology(+)>MRI(-)/cytology(-)
704.863	1.52	0.875	0.638298	4.675	1	MRI(+)/cytology(+)<MRI(-)/cytology(-)
854.728	19.89	0.875	0.638298	3.58	1	MRI(+)/cytology(+)>MRI(-)/cytology(-)
1058.78	1.59	0.875	0.638298	4.73	1	MRI(+)/cytology(+)<MRI(-)/cytology(-)
1076.8	1.49	0.875	0.638298	4.255	1	MRI(+)/cytology(+)<MRI(-)/cytology(-)
1144.79	1.49	0.875	0.638298	4.16	1	MRI(+)/cytology(+)<MRI(-)/cytology(-)
68.9949	24.03	1	0.510638	4.805	1	MRI(+)/cytology(+)>MRI(-)/cytology(-)
91.0552	1.88	1	0.510638	4.77	1	MRI(+)/cytology(+)>MRI(-)/cytology(-)
102.128	21.68	1	0.510638	5.435	1	MRI(+)/cytology(+)<MRI(-)/cytology(-)
102.129	19.9	1	0.510638	5.51	1	MRI(+)/cytology(+)<MRI(-)/cytology(-)
200.94	22.97	1	0.510638	4.165	1	MRI(+)/cytology(+)<MRI(-)/cytology(-)
230.14	22.7	1	0.510638	4.77	1	MRI(+)/cytology(+)>MRI(-)/cytology(-)
362.926	1.6	1	0.510638	5.98	1	MRI(+)/cytology(+)<MRI(-)/cytology(-)
373.26	8.54	1	0.510638	3.65	1	MRI(+)/cytology(+)>MRI(-)/cytology(-)
399.25	14.41	1	0.510638	5.4	1	MRI(+)/cytology(+)>MRI(-)/cytology(-)
512.772	23.04	1	0.510638	3.885	1	MRI(+)/cytology(+)<MRI(-)/cytology(-)
539.818	22.93	1	0.510638	4.71	1	MRI(+)/cytology(+)>MRI(-)/cytology(-)
592.394	9.24	1	0.510638	3.435	1	MRI(+)/cytology(+)<MRI(-)/cytology(-)
605.786	22.94	1	0.510638	4.39	1	MRI(+)/cytology(+)>MRI(-)/cytology(-)
748.856	1.46	1	0.510638	4.95	1	MRI(+)/cytology(+)<MRI(-)/cytology(-)
952.155	1.64	1	0.510638	4.83	1	MRI(+)/cytology(+)>MRI(-)/cytology(-)
1178.77	1.5	1	0.510638	4.67	1	MRI(+)/cytology(+)<MRI(-)/cytology(-)
261.032	9.68	0.5	1	3.3	1	MRI(+)/cytology(+)>MRI(-)/cytology(-)
105.934	23.44	0.625	0.87234	5.05	1	MRI(+)/cytology(+)>MRI(-)/cytology(-)
110.073	18.7	0.625	0.87234	4.21	1	MRI(+)/cytology(+)>MRI(-)/cytology(-)
161.095	12.24	0.625	0.87234	3.8	1	MRI(+)/cytology(+)<MRI(-)/cytology(-)
200.236	10	0.625	0.87234	4.715	1	MRI(+)/cytology(+)>MRI(-)/cytology(-)
249.184	13.06	0.625	0.87234	5.34	1	MRI(+)/cytology(+)>MRI(-)/cytology(-)
353.23	12.49	0.625	0.87234	4.26	1	MRI(+)/cytology(+)>MRI(-)/cytology(-)
566.89	20.32	0.625	0.87234	1.17	0	MRI(+)/cytology(+)<MRI(-)/cytology(-)
610.388	8.93	0.625	0.87234	2	0	MRI(+)/cytology(+)<MRI(-)/cytology(-)
797.345	8.22	0.625	0.87234	3.495	0	MRI(+)/cytology(+)>MRI(-)/cytology(-)
804.814	8.21	0.625	0.87234	3.41	1	MRI(+)/cytology(+)>MRI(-)/cytology(-)
55.9587	22.92	0.75	0.744681	4.23	1	MRI(+)/cytology(+)>MRI(-)/cytology(-)
56.0526	20.28	0.75	0.744681	4.11	1	MRI(+)/cytology(+)<MRI(-)/cytology(-)
116.071	2.19	0.75	0.744681	3.69	1	MRI(+)/cytology(+)>MRI(-)/cytology(-)
123.083	18.64	0.75	0.744681	4.81	1	MRI(+)/cytology(+)>MRI(-)/cytology(-)
193.088	9.27	0.75	0.744681	3.615	1	MRI(+)/cytology(+)>MRI(-)/cytology(-)
217.106	16.4	0.75	0.744681	5.38	1	MRI(+)/cytology(+)>MRI(-)/cytology(-)
230.249	9.72	0.75	0.744681	5.595	1	MRI(+)/cytology(+)>MRI(-)/cytology(-)
263.029	9.68	0.75	0.744681	3.1	1	MRI(+)/cytology(+)>MRI(-)/cytology(-)
290.269	9.78	0.75	0.744681	4.565	1	MRI(+)/cytology(+)>MRI(-)/cytology(-)
291.272	9.82	0.75	0.744681	4.13	1	MRI(+)/cytology(+)>MRI(-)/cytology(-)
295.227	11.39	0.75	0.744681	4.83	1	MRI(+)/cytology(+)<MRI(-)/cytology(-)
309.117	8.81	0.75	0.744681	3.37	1	MRI(+)/cytology(+)>MRI(-)/cytology(-)
327.055	1.57	0.75	0.744681	4.2	1	MRI(+)/cytology(+)>MRI(-)/cytology(-)
334.282	16.26	0.75	0.744681	4.72	1	MRI(+)/cytology(+)>MRI(-)/cytology(-)
353.231	12.07	0.75	0.744681	4.94	1	MRI(+)/cytology(+)<MRI(-)/cytology(-)
416.058	2.14	0.75	0.744681	4.31	1	MRI(+)/cytology(+)>MRI(-)/cytology(-)
681.445	9.09	0.75	0.744681	2.54	0	MRI(+)/cytology(+)>MRI(-)/cytology(-)
853.726	17.18	0.75	0.744681	3.685	0	MRI(+)/cytology(+)>MRI(-)/cytology(-)
853.729	18.81	0.75	0.744681	4.18	1	MRI(+)/cytology(+)>MRI(-)/cytology(-)
854.73	18.79	0.75	0.744681	3.835	1	MRI(+)/cytology(+)>MRI(-)/cytology(-)
854.731	18.67	0.75	0.744681	3.965	1	MRI(+)/cytology(+)>MRI(-)/cytology(-)
57.9366	23.02	0.875	0.617021	4.89	1	MRI(+)/cytology(+)>MRI(-)/cytology(-)
68.995	23.43	0.875	0.617021	5.59	1	MRI(+)/cytology(+)>MRI(-)/cytology(-)
82.9977	23.7	0.875	0.617021	4.87	1	MRI(+)/cytology(+)>MRI(-)/cytology(-)
85.9298	23.44	0.875	0.617021	4.67	1	MRI(+)/cytology(+)>MRI(-)/cytology(-)
100.957	23.07	0.875	0.617021	5.38	1	MRI(+)/cytology(+)>MRI(-)/cytology(-)
102.129	18.47	0.875	0.617021	5.58	1	MRI(+)/cytology(+)<MRI(-)/cytology(-)
102.129	18.6	0.875	0.617021	5.26	1	MRI(+)/cytology(+)<MRI(-)/cytology(-)
102.129	16.6	0.875	0.617021	5.37	1	MRI(+)/cytology(+)<MRI(-)/cytology(-)
102.129	16.62	0.875	0.617021	5.82	1	MRI(+)/cytology(+)<MRI(-)/cytology(-)
103.131	19.96	0.875	0.617021	4.76	1	MRI(+)/cytology(+)<MRI(-)/cytology(-)
109.943	23.53	0.875	0.617021	5.35	1	MRI(+)/cytology(+)>MRI(-)/cytology(-)
123.099	22.68	0.875	0.617021	4.48	1	MRI(+)/cytology(+)>MRI(-)/cytology(-)
123.099	20.17	0.875	0.617021	4.5	1	MRI(+)/cytology(+)>MRI(-)/cytology(-)
124.088	8.4	0.875	0.617021	3.6	1	MRI(+)/cytology(+)>MRI(-)/cytology(-)
127.96	23.03	0.875	0.617021	4.7	1	MRI(+)/cytology(+)>MRI(-)/cytology(-)
181.121	11.8	0.875	0.617021	4.71	1	MRI(+)/cytology(+)<MRI(-)/cytology(-)
192.138	8.48	0.875	0.617021	3.17	1	MRI(+)/cytology(+)>MRI(-)/cytology(-)
239.149	8.42	0.875	0.617021	4.47	1	MRI(+)/cytology(+)>MRI(-)/cytology(-)
239.149	18.75	0.875	0.617021	5.435	1	MRI(+)/cytology(+)>MRI(-)/cytology(-)
269.246	14.72	0.875	0.617021	5.08	1	MRI(+)/cytology(+)>MRI(-)/cytology(-)
283.175	18.76	0.875	0.617021	5.03	1	MRI(+)/cytology(+)>MRI(-)/cytology(-)
283.175	18.79	0.875	0.617021	5.015	1	MRI(+)/cytology(+)>MRI(-)/cytology(-)
285.292	9.8	0.875	0.617021	4.49	1	MRI(+)/cytology(+)>MRI(-)/cytology(-)
291.273	10.03	0.875	0.617021	3.02	1	MRI(+)/cytology(+)<MRI(-)/cytology(-)
311.293	16.3	0.875	0.617021	5.06	1	MRI(+)/cytology(+)>MRI(-)/cytology(-)
337.233	16.76	0.875	0.617021	5.015	1	MRI(+)/cytology(+)>MRI(-)/cytology(-)
337.235	17.1	0.875	0.617021	5.175	1	MRI(+)/cytology(+)>MRI(-)/cytology(-)
384.115	9.19	0.875	0.617021	2.05	0	MRI(+)/cytology(+)>MRI(-)/cytology(-)
448.881	1.56	0.875	0.617021	4.4	1	MRI(+)/cytology(+)<MRI(-)/cytology(-)
461.284	8.94	0.875	0.617021	3.4	1	MRI(+)/cytology(+)<MRI(-)/cytology(-)
463.13	16.1	0.875	0.617021	4.48	1	MRI(+)/cytology(+)>MRI(-)/cytology(-)
484.274	8.49	0.875	0.617021	2.915	1	MRI(+)/cytology(+)<MRI(-)/cytology(-)
505.346	9.87	0.875	0.617021	3.075	1	MRI(+)/cytology(+)<MRI(-)/cytology(-)
521.335	9.91	0.875	0.617021	3.79	1	MRI(+)/cytology(+)<MRI(-)/cytology(-)
525.29	9.91	0.875	0.617021	4.53	1	MRI(+)/cytology(+)<MRI(-)/cytology(-)
537.33	8.53	0.875	0.617021	3.5	1	MRI(+)/cytology(+)<MRI(-)/cytology(-)
548.335	9.94	0.875	0.617021	3.66	1	MRI(+)/cytology(+)<MRI(-)/cytology(-)
564.36	9.94	0.875	0.617021	4.265	1	MRI(+)/cytology(+)<MRI(-)/cytology(-)
650.848	1.57	0.875	0.617021	5.25	1	MRI(+)/cytology(+)<MRI(-)/cytology(-)
702.863	20.31	0.875	0.617021	1.46	0	MRI(+)/cytology(+)<MRI(-)/cytology(-)
853.728	21.61	0.875	0.617021	3.765	1	MRI(+)/cytology(+)>MRI(-)/cytology(-)
880.821	1.61	0.875	0.617021	4.82	1	MRI(+)/cytology(+)<MRI(-)/cytology(-)
922.802	1.68	0.875	0.617021	4.99	1	MRI(+)/cytology(+)<MRI(-)/cytology(-)
1008.81	1.49	0.875	0.617021	4.33	1	MRI(+)/cytology(+)<MRI(-)/cytology(-)
59.0516	20.38	1	0.489362	5.34	1	MRI(+)/cytology(+)>MRI(-)/cytology(-)
68.995	24.23	1	0.489362	4.61	1	MRI(+)/cytology(+)>MRI(-)/cytology(-)
91.0554	20.52	1	0.489362	4.815	1	MRI(+)/cytology(+)>MRI(-)/cytology(-)
99.9687	23.05	1	0.489362	4.85	1	MRI(+)/cytology(+)>MRI(-)/cytology(-)
101.964	23.01	1	0.489362	4.77	1	MRI(+)/cytology(+)>MRI(-)/cytology(-)
102.127	19.18	1	0.489362	5.215	1	MRI(+)/cytology(+)<MRI(-)/cytology(-)
102.127	11.78	1	0.489362	5.41	1	MRI(+)/cytology(+)<MRI(-)/cytology(-)
102.127	21.81	1	0.489362	5.73	1	MRI(+)/cytology(+)<MRI(-)/cytology(-)
102.128	23.79	1	0.489362	5.21	1	MRI(+)/cytology(+)<MRI(-)/cytology(-)
102.128	19.19	1	0.489362	5.725	1	MRI(+)/cytology(+)<MRI(-)/cytology(-)
102.129	20.51	1	0.489362	5.75	1	MRI(+)/cytology(+)<MRI(-)/cytology(-)
102.129	21.55	1	0.489362	5.275	1	MRI(+)/cytology(+)<MRI(-)/cytology(-)
102.129	11.85	1	0.489362	5.42	1	MRI(+)/cytology(+)<MRI(-)/cytology(-)
102.129	10.14	1	0.489362	5.535	1	MRI(+)/cytology(+)<MRI(-)/cytology(-)
102.129	11.04	1	0.489362	5.605	1	MRI(+)/cytology(+)<MRI(-)/cytology(-)
102.129	15.8	1	0.489362	5.59	1	MRI(+)/cytology(+)<MRI(-)/cytology(-)
102.129	23.32	1	0.489362	4.915	1	MRI(+)/cytology(+)<MRI(-)/cytology(-)
103.13	20.51	1	0.489362	4.745	1	MRI(+)/cytology(+)<MRI(-)/cytology(-)
123.079	20.2	1	0.489362	4.01	1	MRI(+)/cytology(+)>MRI(-)/cytology(-)
123.966	23.45	1	0.489362	5.17	1	MRI(+)/cytology(+)>MRI(-)/cytology(-)
299.22	13.86	1	0.489362	3.73	1	MRI(+)/cytology(+)>MRI(-)/cytology(-)
348.872	22.99	1	0.489362	4.46	1	MRI(+)/cytology(+)<MRI(-)/cytology(-)
365.836	22.96	1	0.489362	4.19	1	MRI(+)/cytology(+)>MRI(-)/cytology(-)
375.248	15.26	1	0.489362	4.905	1	MRI(+)/cytology(+)>MRI(-)/cytology(-)
430.814	22.91	1	0.489362	4.155	1	MRI(+)/cytology(+)>MRI(-)/cytology(-)
461.283	9.3	1	0.489362	3.39	1	MRI(+)/cytology(+)<MRI(-)/cytology(-)
536.331	8.88	1	0.489362	3.18	1	MRI(+)/cytology(+)>MRI(-)/cytology(-)
539.809	22.99	1	0.489362	4.59	1	MRI(+)/cytology(+)<MRI(-)/cytology(-)
804.856	1.51	1	0.489362	4.8	1	MRI(+)/cytology(+)<MRI(-)/cytology(-)
839.336	1.61	1	0.489362	5.07	1	MRI(+)/cytology(+)>MRI(-)/cytology(-)
1008.8	1.71	1	0.489362	5.44	1	MRI(+)/cytology(+)>MRI(-)/cytology(-)
1144.79	1.5	1	0.489362	4.52	1	MRI(+)/cytology(+)<MRI(-)/cytology(-)
127.094	7.89	0.625	0.851064	3.305	1	MRI(+)/cytology(+)>MRI(-)/cytology(-)
136.021	18.18	0.625	0.851064	4.74	1	MRI(+)/cytology(+)>MRI(-)/cytology(-)
144.174	9.57	0.625	0.851064	1.95	1	MRI(+)/cytology(+)<MRI(-)/cytology(-)
204.12	2.41	0.625	0.851064	4.035	1	MRI(+)/cytology(+)>MRI(-)/cytology(-)
207.157	9.75	0.625	0.851064	3.985	1	MRI(+)/cytology(+)>MRI(-)/cytology(-)
214.254	10.13	0.625	0.851064	4.95	1	MRI(+)/cytology(+)>MRI(-)/cytology(-)
235.131	10.87	0.625	0.851064	4.78	1	MRI(+)/cytology(+)>MRI(-)/cytology(-)
290.269	9.88	0.625	0.851064	5.27	1	MRI(+)/cytology(+)>MRI(-)/cytology(-)
323.864	22.92	0.625	0.851064	4.31	1	MRI(+)/cytology(+)>MRI(-)/cytology(-)
339.249	13.44	0.625	0.851064	4.14	1	MRI(+)/cytology(+)<MRI(-)/cytology(-)
497.235	8.58	0.625	0.851064	2.505	1	MRI(+)/cytology(+)<MRI(-)/cytology(-)
522.339	8.66	0.625	0.851064	3.085	1	MRI(+)/cytology(+)<MRI(-)/cytology(-)
536.319	9.85	0.625	0.851064	2.985	1	MRI(+)/cytology(+)<MRI(-)/cytology(-)
570.32	8.79	0.625	0.851064	3.705	1	MRI(+)/cytology(+)<MRI(-)/cytology(-)
61.0101	22.92	0.75	0.723404	4.26	1	MRI(+)/cytology(+)>MRI(-)/cytology(-)
68.9964	23.4	0.75	0.723404	5.49	1	MRI(+)/cytology(+)>MRI(-)/cytology(-)
91.0544	20.64	0.75	0.723404	5.145	1	MRI(+)/cytology(+)>MRI(-)/cytology(-)
99.949	22.96	0.75	0.723404	4.74	1	MRI(+)/cytology(+)>MRI(-)/cytology(-)
102.126	16.61	0.75	0.723404	4.865	1	MRI(+)/cytology(+)<MRI(-)/cytology(-)
102.129	17.97	0.75	0.723404	5.275	1	MRI(+)/cytology(+)<MRI(-)/cytology(-)
102.129	14.56	0.75	0.723404	5.465	1	MRI(+)/cytology(+)<MRI(-)/cytology(-)
102.129	10.27	0.75	0.723404	5.14	1	MRI(+)/cytology(+)<MRI(-)/cytology(-)
102.129	9.46	0.75	0.723404	5.255	1	MRI(+)/cytology(+)<MRI(-)/cytology(-)
102.129	23.18	0.75	0.723404	4.41	1	MRI(+)/cytology(+)<MRI(-)/cytology(-)
102.955	23.04	0.75	0.723404	4.67	1	MRI(+)/cytology(+)>MRI(-)/cytology(-)
105.034	7.99	0.75	0.723404	3.17	1	MRI(+)/cytology(+)>MRI(-)/cytology(-)
118.086	2.1	0.75	0.723404	4.605	1	MRI(+)/cytology(+)>MRI(-)/cytology(-)
143.959	23.03	0.75	0.723404	5.59	1	MRI(+)/cytology(+)>MRI(-)/cytology(-)
155.087	8.45	0.75	0.723404	3.6	1	MRI(+)/cytology(+)>MRI(-)/cytology(-)
171.113	8.33	0.75	0.723404	3.4	1	MRI(+)/cytology(+)>MRI(-)/cytology(-)
200.2	13.52	0.75	0.723404	4.75	1	MRI(+)/cytology(+)>MRI(-)/cytology(-)
200.236	10.01	0.75	0.723404	4.67	1	MRI(+)/cytology(+)>MRI(-)/cytology(-)
206.07	2.09	0.75	0.723404	4.05	1	MRI(+)/cytology(+)>MRI(-)/cytology(-)
214.253	10.07	0.75	0.723404	4.375	1	MRI(+)/cytology(+)>MRI(-)/cytology(-)
233.099	8.52	0.75	0.723404	3.86	1	MRI(+)/cytology(+)>MRI(-)/cytology(-)
250.178	11.48	0.75	0.723404	5.01	1	MRI(+)/cytology(+)>MRI(-)/cytology(-)
250.179	11.54	0.75	0.723404	5.13	1	MRI(+)/cytology(+)>MRI(-)/cytology(-)
255.066	7.88	0.75	0.723404	2.845	1	MRI(+)/cytology(+)>MRI(-)/cytology(-)
262.136	8.85	0.75	0.723404	3.375	1	MRI(+)/cytology(+)>MRI(-)/cytology(-)
305.158	18.06	0.75	0.723404	5.71	1	MRI(+)/cytology(+)>MRI(-)/cytology(-)
307.176	8.61	0.75	0.723404	3.475	1	MRI(+)/cytology(+)<MRI(-)/cytology(-)
329.192	8.67	0.75	0.723404	3.905	1	MRI(+)/cytology(+)<MRI(-)/cytology(-)
343.296	11.18	0.75	0.723404	4.11	1	MRI(+)/cytology(+)>MRI(-)/cytology(-)
360.219	8.49	0.75	0.723404	3.87	1	MRI(+)/cytology(+)>MRI(-)/cytology(-)
360.222	8.5	0.75	0.723404	3.785	1	MRI(+)/cytology(+)>MRI(-)/cytology(-)
399.081	2.13	0.75	0.723404	4.615	1	MRI(+)/cytology(+)<MRI(-)/cytology(-)
502.295	13.35	0.75	0.723404	3.98	1	MRI(+)/cytology(+)<MRI(-)/cytology(-)
514.875	1.57	0.75	0.723404	5.16	1	MRI(+)/cytology(+)<MRI(-)/cytology(-)
526.291	13.28	0.75	0.723404	4.55	1	MRI(+)/cytology(+)<MRI(-)/cytology(-)
530.318	14.35	0.75	0.723404	3.29	1	MRI(+)/cytology(+)<MRI(-)/cytology(-)
542.318	13.35	0.75	0.723404	3.22	1	MRI(+)/cytology(+)<MRI(-)/cytology(-)
558.131	7.91	0.75	0.723404	1.845	1	MRI(+)/cytology(+)<MRI(-)/cytology(-)
609.391	9.96	0.75	0.723404	2.84	1	MRI(+)/cytology(+)<MRI(-)/cytology(-)
653.422	9.99	0.75	0.723404	2.36	0	MRI(+)/cytology(+)<MRI(-)/cytology(-)
854.726	18.13	0.75	0.723404	3.73	1	MRI(+)/cytology(+)>MRI(-)/cytology(-)
68.9949	23.46	0.875	0.595745	5.65	1	MRI(+)/cytology(+)>MRI(-)/cytology(-)
69.9943	23.03	0.875	0.595745	4.775	1	MRI(+)/cytology(+)>MRI(-)/cytology(-)
70.994	23.01	0.875	0.595745	4.44	1	MRI(+)/cytology(+)>MRI(-)/cytology(-)
82.0544	20.49	0.875	0.595745	3.61	1	MRI(+)/cytology(+)>MRI(-)/cytology(-)
82.9974	23.42	0.875	0.595745	5.4	1	MRI(+)/cytology(+)>MRI(-)/cytology(-)
83.9984	22.98	0.875	0.595745	4.985	1	MRI(+)/cytology(+)>MRI(-)/cytology(-)
85.0406	18.83	0.875	0.595745	3.085	1	MRI(+)/cytology(+)<MRI(-)/cytology(-)
88.9325	23.44	0.875	0.595745	5.73	1	MRI(+)/cytology(+)>MRI(-)/cytology(-)
89.9399	23.47	0.875	0.595745	5.02	1	MRI(+)/cytology(+)>MRI(-)/cytology(-)
102.091	18.5	0.875	0.595745	4.5	1	MRI(+)/cytology(+)<MRI(-)/cytology(-)
102.127	14.51	0.875	0.595745	5.395	1	MRI(+)/cytology(+)<MRI(-)/cytology(-)
102.128	22.84	0.875	0.595745	4.965	1	MRI(+)/cytology(+)<MRI(-)/cytology(-)
102.128	17.27	0.875	0.595745	5.615	1	MRI(+)/cytology(+)<MRI(-)/cytology(-)
102.129	18.42	0.875	0.595745	5.245	1	MRI(+)/cytology(+)<MRI(-)/cytology(-)
102.129	12.8	0.875	0.595745	5.34	1	MRI(+)/cytology(+)<MRI(-)/cytology(-)
102.129	2.25	0.875	0.595745	4.92	1	MRI(+)/cytology(+)<MRI(-)/cytology(-)
102.129	24.09	0.875	0.595745	4.875	1	MRI(+)/cytology(+)<MRI(-)/cytology(-)
102.129	9.21	0.875	0.595745	5.26	1	MRI(+)/cytology(+)<MRI(-)/cytology(-)
102.129	18.64	0.875	0.595745	5.83	1	MRI(+)/cytology(+)<MRI(-)/cytology(-)
105.954	23.39	0.875	0.595745	4.7	1	MRI(+)/cytology(+)>MRI(-)/cytology(-)
110.071	22.68	0.875	0.595745	4.325	1	MRI(+)/cytology(+)>MRI(-)/cytology(-)
112.956	23.57	0.875	0.595745	5.48	1	MRI(+)/cytology(+)>MRI(-)/cytology(-)
126.96	22.99	0.875	0.595745	5.55	1	MRI(+)/cytology(+)>MRI(-)/cytology(-)
130.962	23.01	0.875	0.595745	4.52	1	MRI(+)/cytology(+)>MRI(-)/cytology(-)
140.95	23.65	0.875	0.595745	5.29	1	MRI(+)/cytology(+)>MRI(-)/cytology(-)
165.111	18.8	0.875	0.595745	4.94	1	MRI(+)/cytology(+)>MRI(-)/cytology(-)
195.122	18.8	0.875	0.595745	4.96	1	MRI(+)/cytology(+)>MRI(-)/cytology(-)
201.11	8.61	0.875	0.595745	3.505	1	MRI(+)/cytology(+)>MRI(-)/cytology(-)
203.218	9.31	0.875	0.595745	2.76	0	MRI(+)/cytology(+)<MRI(-)/cytology(-)
227.953	1.58	0.875	0.595745	4.63	1	MRI(+)/cytology(+)<MRI(-)/cytology(-)
229.893	22.98	0.875	0.595745	4.94	1	MRI(+)/cytology(+)>MRI(-)/cytology(-)
233.1	7.63	0.875	0.595745	3.37	1	MRI(+)/cytology(+)>MRI(-)/cytology(-)
239.149	18.82	0.875	0.595745	5.12	1	MRI(+)/cytology(+)>MRI(-)/cytology(-)
241.031	1.93	0.875	0.595745	3.44	1	MRI(+)/cytology(+)>MRI(-)/cytology(-)
247.246	9.31	0.875	0.595745	3.57	1	MRI(+)/cytology(+)<MRI(-)/cytology(-)
256.264	16.38	0.875	0.595745	5.25	1	MRI(+)/cytology(+)>MRI(-)/cytology(-)
262.134	9.61	0.875	0.595745	3.485	1	MRI(+)/cytology(+)<MRI(-)/cytology(-)
295.225	12.07	0.875	0.595745	4.75	1	MRI(+)/cytology(+)>MRI(-)/cytology(-)
437.191	12.99	0.875	0.595745	4.68	1	MRI(+)/cytology(+)<MRI(-)/cytology(-)
483.265	8.21	0.875	0.595745	2.65	1	MRI(+)/cytology(+)>MRI(-)/cytology(-)
498.902	1.6	0.875	0.595745	5.965	1	MRI(+)/cytology(+)<MRI(-)/cytology(-)
521.341	13.34	0.875	0.595745	4.36	1	MRI(+)/cytology(+)<MRI(-)/cytology(-)
523.344	8.79	0.875	0.595745	2.03	0	MRI(+)/cytology(+)>MRI(-)/cytology(-)
566.36	9.24	0.875	0.595745	2.445	1	MRI(+)/cytology(+)<MRI(-)/cytology(-)
658.367	9.47	0.875	0.595745	2.52	1	MRI(+)/cytology(+)>MRI(-)/cytology(-)
702.863	19.36	0.875	0.595745	1.395	0	MRI(+)/cytology(+)>MRI(-)/cytology(-)
1016.79	1.59	0.875	0.595745	4.645	1	MRI(+)/cytology(+)<MRI(-)/cytology(-)
1025.47	1.57	0.875	0.595745	4.3	1	MRI(+)/cytology(+)<MRI(-)/cytology(-)
1048.13	1.63	0.875	0.595745	4.53	1	MRI(+)/cytology(+)<MRI(-)/cytology(-)
1065.79	1.62	0.875	0.595745	4.2	1	MRI(+)/cytology(+)>MRI(-)/cytology(-)
1178.78	1.52	0.875	0.595745	4.795	1	MRI(+)/cytology(+)<MRI(-)/cytology(-)
65.9667	22.97	1	0.468085	4.83	1	MRI(+)/cytology(+)>MRI(-)/cytology(-)
65.9667	23.07	1	0.468085	4.89	1	MRI(+)/cytology(+)>MRI(-)/cytology(-)
82.0528	20.44	1	0.468085	2.96	1	MRI(+)/cytology(+)>MRI(-)/cytology(-)
91.0138	22.98	1	0.468085	4.48	1	MRI(+)/cytology(+)>MRI(-)/cytology(-)
102.127	23.88	1	0.468085	5.61	1	MRI(+)/cytology(+)<MRI(-)/cytology(-)
102.127	23.75	1	0.468085	5.01	1	MRI(+)/cytology(+)<MRI(-)/cytology(-)
102.128	20.54	1	0.468085	5.67	1	MRI(+)/cytology(+)<MRI(-)/cytology(-)
102.128	17.23	1	0.468085	5.54	1	MRI(+)/cytology(+)<MRI(-)/cytology(-)
102.129	19.85	1	0.468085	5.655	1	MRI(+)/cytology(+)<MRI(-)/cytology(-)
102.129	9.92	1	0.468085	5.235	1	MRI(+)/cytology(+)<MRI(-)/cytology(-)
102.129	21.67	1	0.468085	5.12	1	MRI(+)/cytology(+)<MRI(-)/cytology(-)
104.108	1.75	1	0.468085	3.885	1	MRI(+)/cytology(+)>MRI(-)/cytology(-)
122.964	23.51	1	0.468085	6.41	1	MRI(+)/cytology(+)>MRI(-)/cytology(-)
195.123	8.78	1	0.468085	4.04	1	MRI(+)/cytology(+)>MRI(-)/cytology(-)
198.074	8.02	1	0.468085	2.68	1	MRI(+)/cytology(+)>MRI(-)/cytology(-)
261.132	15.74	1	0.468085	4.97	1	MRI(+)/cytology(+)>MRI(-)/cytology(-)
261.132	15.87	1	0.468085	5.03	1	MRI(+)/cytology(+)>MRI(-)/cytology(-)
283.174	8.58	1	0.468085	4	1	MRI(+)/cytology(+)>MRI(-)/cytology(-)
289.153	13.92	1	0.468085	4.64	1	MRI(+)/cytology(+)>MRI(-)/cytology(-)
291.146	7.74	1	0.468085	2.78	1	MRI(+)/cytology(+)>MRI(-)/cytology(-)
299.22	13.51	1	0.468085	4.89	1	MRI(+)/cytology(+)>MRI(-)/cytology(-)
362.925	1.62	1	0.468085	6.04	1	MRI(+)/cytology(+)<MRI(-)/cytology(-)
365.136	14.67	1	0.468085	4.54	1	MRI(+)/cytology(+)<MRI(-)/cytology(-)
400.252	14.43	1	0.468085	4.86	1	MRI(+)/cytology(+)>MRI(-)/cytology(-)
413.269	19.1	1	0.468085	4.88	1	MRI(+)/cytology(+)>MRI(-)/cytology(-)
430.914	1.58	1	0.468085	6.14	1	MRI(+)/cytology(+)<MRI(-)/cytology(-)
439.804	22.99	1	0.468085	4.11	1	MRI(+)/cytology(+)>MRI(-)/cytology(-)
465.213	19.11	1	0.468085	3.27	1	MRI(+)/cytology(+)>MRI(-)/cytology(-)
475.833	23	1	0.468085	4.09	1	MRI(+)/cytology(+)<MRI(-)/cytology(-)
504.781	22.92	1	0.468085	4.07	1	MRI(+)/cytology(+)>MRI(-)/cytology(-)
540.537	15.07	1	0.468085	4.46	1	MRI(+)/cytology(+)>MRI(-)/cytology(-)
554.176	17.49	1	0.468085	4.11	1	MRI(+)/cytology(+)<MRI(-)/cytology(-)
734.748	23.01	1	0.468085	3.815	1	MRI(+)/cytology(+)<MRI(-)/cytology(-)
744.841	1.51	1	0.468085	4.44	1	MRI(+)/cytology(+)<MRI(-)/cytology(-)
144.102	2.28	0.5	0.957447	3.185	1	MRI(+)/cytology(+)<MRI(-)/cytology(-)
146.06	8.16	0.5	0.957447	2.63	1	MRI(+)/cytology(+)<MRI(-)/cytology(-)
154.086	7.89	0.5	0.957447	3.255	1	MRI(+)/cytology(+)>MRI(-)/cytology(-)
255.066	8.2	0.5	0.957447	3.085	1	MRI(+)/cytology(+)>MRI(-)/cytology(-)
305.156	16.52	0.5	0.957447	5.38	1	MRI(+)/cytology(+)>MRI(-)/cytology(-)
315.253	16.76	0.5	0.957447	4.88	1	MRI(+)/cytology(+)>MRI(-)/cytology(-)
568.337	13.3	0.5	0.957447	2.655	1	MRI(+)/cytology(+)<MRI(-)/cytology(-)
614.338	9.27	0.5	0.957447	2.755	1	MRI(+)/cytology(+)<MRI(-)/cytology(-)
718.839	1.66	0.5	0.957447	5.26	1	MRI(+)/cytology(+)<MRI(-)/cytology(-)
822.919	7.97	0.5	0.957447	3.07	0	MRI(+)/cytology(+)>MRI(-)/cytology(-)
126.092	8.42	0.625	0.829787	3.55	1	MRI(+)/cytology(+)>MRI(-)/cytology(-)
128.096	8.03	0.625	0.829787	2.995	1	MRI(+)/cytology(+)>MRI(-)/cytology(-)
152.07	8.04	0.625	0.829787	3.37	1	MRI(+)/cytology(+)>MRI(-)/cytology(-)
152.071	8.21	0.625	0.829787	3.21	1	MRI(+)/cytology(+)>MRI(-)/cytology(-)
226.179	10.67	0.625	0.829787	4.47	1	MRI(+)/cytology(+)>MRI(-)/cytology(-)
283.175	18.15	0.625	0.829787	5.25	1	MRI(+)/cytology(+)>MRI(-)/cytology(-)
419.081	2.12	0.625	0.829787	3.3	1	MRI(+)/cytology(+)>MRI(-)/cytology(-)
480.309	14.18	0.625	0.829787	3.455	1	MRI(+)/cytology(+)<MRI(-)/cytology(-)
481.132	8.21	0.625	0.829787	2.59	1	MRI(+)/cytology(+)>MRI(-)/cytology(-)
522.338	8.61	0.625	0.829787	3.3	1	MRI(+)/cytology(+)<MRI(-)/cytology(-)
544.337	13.35	0.625	0.829787	3.27	1	MRI(+)/cytology(+)<MRI(-)/cytology(-)
610.39	9.03	0.625	0.829787	2.23	0	MRI(+)/cytology(+)<MRI(-)/cytology(-)
634.88	21.32	0.625	0.829787	1.15	0	MRI(+)/cytology(+)<MRI(-)/cytology(-)
777.862	8.24	0.625	0.829787	3.445	0	MRI(+)/cytology(+)>MRI(-)/cytology(-)
990.786	1.62	0.625	0.829787	4.71	1	MRI(+)/cytology(+)<MRI(-)/cytology(-)
1153.28	18.85	0.625	0.829787	1.94	1	MRI(+)/cytology(+)<MRI(-)/cytology(-)
102.127	15.68	0.75	0.702128	5.435	1	MRI(+)/cytology(+)<MRI(-)/cytology(-)
102.129	10.75	0.75	0.702128	5.28	1	MRI(+)/cytology(+)<MRI(-)/cytology(-)
102.129	10.54	0.75	0.702128	5.095	1	MRI(+)/cytology(+)<MRI(-)/cytology(-)
102.129	15.65	0.75	0.702128	5.425	1	MRI(+)/cytology(+)<MRI(-)/cytology(-)
114.066	1.74	0.75	0.702128	4.92	1	MRI(+)/cytology(+)>MRI(-)/cytology(-)
116.952	23.03	0.75	0.702128	4.88	1	MRI(+)/cytology(+)>MRI(-)/cytology(-)
123.1	20.1	0.75	0.702128	4.425	1	MRI(+)/cytology(+)>MRI(-)/cytology(-)
124.087	20.9	0.75	0.702128	4.96	1	MRI(+)/cytology(+)<MRI(-)/cytology(-)
124.964	23	0.75	0.702128	5.84	1	MRI(+)/cytology(+)>MRI(-)/cytology(-)
127.094	8.02	0.75	0.702128	3.26	1	MRI(+)/cytology(+)>MRI(-)/cytology(-)
154.085	8.18	0.75	0.702128	3.09	1	MRI(+)/cytology(+)>MRI(-)/cytology(-)
154.086	8.43	0.75	0.702128	3.015	1	MRI(+)/cytology(+)>MRI(-)/cytology(-)
154.086	8.42	0.75	0.702128	3.06	1	MRI(+)/cytology(+)>MRI(-)/cytology(-)
175.033	20.13	0.75	0.702128	3.935	1	MRI(+)/cytology(+)>MRI(-)/cytology(-)
186.218	9.94	0.75	0.702128	3.44	1	MRI(+)/cytology(+)<MRI(-)/cytology(-)
202.059	2.05	0.75	0.702128	3.84	1	MRI(+)/cytology(+)>MRI(-)/cytology(-)
214.253	10.08	0.75	0.702128	4.37	1	MRI(+)/cytology(+)>MRI(-)/cytology(-)
217.106	15.75	0.75	0.702128	5.12	1	MRI(+)/cytology(+)>MRI(-)/cytology(-)
226.093	8.17	0.75	0.702128	3.355	1	MRI(+)/cytology(+)>MRI(-)/cytology(-)
226.952	22.68	0.75	0.702128	5.25	1	MRI(+)/cytology(+)>MRI(-)/cytology(-)
230.212	9.58	0.75	0.702128	2.895	1	MRI(+)/cytology(+)>MRI(-)/cytology(-)
230.248	9.98	0.75	0.702128	4.77	1	MRI(+)/cytology(+)<MRI(-)/cytology(-)
249.117	8.85	0.75	0.702128	3.02	1	MRI(+)/cytology(+)>MRI(-)/cytology(-)
258.278	10.47	0.75	0.702128	5.14	1	MRI(+)/cytology(+)>MRI(-)/cytology(-)
258.898	1.57	0.75	0.702128	3.51	1	MRI(+)/cytology(+)<MRI(-)/cytology(-)
274.274	9.58	0.75	0.702128	5.7	1	MRI(+)/cytology(+)>MRI(-)/cytology(-)
275.277	9.61	0.75	0.702128	5.255	1	MRI(+)/cytology(+)>MRI(-)/cytology(-)
277.127	9.57	0.75	0.702128	4.14	1	MRI(+)/cytology(+)<MRI(-)/cytology(-)
290.271	9.81	0.75	0.702128	5.01	1	MRI(+)/cytology(+)>MRI(-)/cytology(-)
301.141	15	0.75	0.702128	4.905	1	MRI(+)/cytology(+)<MRI(-)/cytology(-)
318.299	9.71	0.75	0.702128	3.87	1	MRI(+)/cytology(+)>MRI(-)/cytology(-)
320.257	13.6	0.75	0.702128	3.83	1	MRI(+)/cytology(+)>MRI(-)/cytology(-)
321.151	7.72	0.75	0.702128	2.93	1	MRI(+)/cytology(+)>MRI(-)/cytology(-)
337.104	13.16	0.75	0.702128	4.72	1	MRI(+)/cytology(+)>MRI(-)/cytology(-)
337.237	17.13	0.75	0.702128	5.26	1	MRI(+)/cytology(+)>MRI(-)/cytology(-)
394.216	8.38	0.75	0.702128	3.71	1	MRI(+)/cytology(+)<MRI(-)/cytology(-)
409.207	9.15	0.75	0.702128	3.84	1	MRI(+)/cytology(+)>MRI(-)/cytology(-)
437.238	19.6	0.75	0.702128	4.77	1	MRI(+)/cytology(+)<MRI(-)/cytology(-)
460.282	8.94	0.75	0.702128	4.115	1	MRI(+)/cytology(+)<MRI(-)/cytology(-)
483.262	8.42	0.75	0.702128	4.37	1	MRI(+)/cytology(+)<MRI(-)/cytology(-)
498.241	8.2	0.75	0.702128	3.125	0	MRI(+)/cytology(+)>MRI(-)/cytology(-)
504.308	9.36	0.75	0.702128	4.04	1	MRI(+)/cytology(+)<MRI(-)/cytology(-)
521.335	9.36	0.75	0.702128	3.79	1	MRI(+)/cytology(+)<MRI(-)/cytology(-)
536.329	8.92	0.75	0.702128	3.2	1	MRI(+)/cytology(+)<MRI(-)/cytology(-)
548.332	9.4	0.75	0.702128	3.835	1	MRI(+)/cytology(+)<MRI(-)/cytology(-)
559.133	17.3	0.75	0.702128	4.405	1	MRI(+)/cytology(+)>MRI(-)/cytology(-)
615.343	8.64	0.75	0.702128	3.905	1	MRI(+)/cytology(+)<MRI(-)/cytology(-)
629.317	8.88	0.75	0.702128	2.095	0	MRI(+)/cytology(+)<MRI(-)/cytology(-)
653.411	8.94	0.75	0.702128	2.61	0	MRI(+)/cytology(+)<MRI(-)/cytology(-)
786.826	1.61	0.75	0.702128	5.22	1	MRI(+)/cytology(+)<MRI(-)/cytology(-)
796.8	19.94	0.75	0.702128	3.58	1	MRI(+)/cytology(+)>MRI(-)/cytology(-)
853.722	17.86	0.75	0.702128	3.59	0	MRI(+)/cytology(+)>MRI(-)/cytology(-)
922.806	1.55	0.75	0.702128	4.84	1	MRI(+)/cytology(+)<MRI(-)/cytology(-)
59.9332	23.03	0.875	0.574468	4.495	1	MRI(+)/cytology(+)>MRI(-)/cytology(-)
68.995	23.72	0.875	0.574468	5.3	1	MRI(+)/cytology(+)>MRI(-)/cytology(-)
69.9953	23.11	0.875	0.574468	4.97	1	MRI(+)/cytology(+)>MRI(-)/cytology(-)
72.9388	23.53	0.875	0.574468	6.22	1	MRI(+)/cytology(+)>MRI(-)/cytology(-)
72.9393	23.46	0.875	0.574468	6.01	1	MRI(+)/cytology(+)>MRI(-)/cytology(-)
73.9458	23.52	0.875	0.574468	5.43	1	MRI(+)/cytology(+)>MRI(-)/cytology(-)
74.9382	23.08	0.875	0.574468	4.695	1	MRI(+)/cytology(+)>MRI(-)/cytology(-)
85.9417	23.03	0.875	0.574468	5.4	1	MRI(+)/cytology(+)>MRI(-)/cytology(-)
87.9256	24.13	0.875	0.574468	4.85	1	MRI(+)/cytology(+)>MRI(-)/cytology(-)
87.9369	23.06	0.875	0.574468	4.81	1	MRI(+)/cytology(+)>MRI(-)/cytology(-)
90.4889	23.45	0.875	0.574468	4.785	1	MRI(+)/cytology(+)>MRI(-)/cytology(-)
90.4903	23.5	0.875	0.574468	4.79	1	MRI(+)/cytology(+)>MRI(-)/cytology(-)
97.9689	23.5	0.875	0.574468	5.73	1	MRI(+)/cytology(+)>MRI(-)/cytology(-)
98.9608	22.93	0.875	0.574468	4.56	1	MRI(+)/cytology(+)>MRI(-)/cytology(-)
99.9253	23.55	0.875	0.574468	4.785	1	MRI(+)/cytology(+)>MRI(-)/cytology(-)
102.127	20.38	0.875	0.574468	5.43	1	MRI(+)/cytology(+)<MRI(-)/cytology(-)
102.127	14.84	0.875	0.574468	5.7	1	MRI(+)/cytology(+)<MRI(-)/cytology(-)
102.128	17.47	0.875	0.574468	5.77	1	MRI(+)/cytology(+)<MRI(-)/cytology(-)
102.128	21.47	0.875	0.574468	5.66	1	MRI(+)/cytology(+)<MRI(-)/cytology(-)
102.129	16.54	0.875	0.574468	5.82	1	MRI(+)/cytology(+)<MRI(-)/cytology(-)
102.129	17.09	0.875	0.574468	5.4	1	MRI(+)/cytology(+)<MRI(-)/cytology(-)
102.129	14.95	0.875	0.574468	5.765	1	MRI(+)/cytology(+)<MRI(-)/cytology(-)
103.132	19.29	0.875	0.574468	4.58	1	MRI(+)/cytology(+)<MRI(-)/cytology(-)
117.959	22.99	0.875	0.574468	5.24	1	MRI(+)/cytology(+)>MRI(-)/cytology(-)
123.098	18.7	0.875	0.574468	4.47	1	MRI(+)/cytology(+)>MRI(-)/cytology(-)
123.099	19.51	0.875	0.574468	4.455	1	MRI(+)/cytology(+)>MRI(-)/cytology(-)
124.087	14.23	0.875	0.574468	4.54	1	MRI(+)/cytology(+)>MRI(-)/cytology(-)
128.95	23.69	0.875	0.574468	4.715	1	MRI(+)/cytology(+)>MRI(-)/cytology(-)
128.961	22.99	0.875	0.574468	4.91	1	MRI(+)/cytology(+)>MRI(-)/cytology(-)
144.175	7.63	0.875	0.574468	1.565	0	MRI(+)/cytology(+)<MRI(-)/cytology(-)
153.074	8.5	0.875	0.574468	3.425	1	MRI(+)/cytology(+)>MRI(-)/cytology(-)
166.097	20.05	0.875	0.574468	4.545	1	MRI(+)/cytology(+)>MRI(-)/cytology(-)
166.097	18.84	0.875	0.574468	4.81	1	MRI(+)/cytology(+)>MRI(-)/cytology(-)
172.098	8.88	0.875	0.574468	2.83	1	MRI(+)/cytology(+)>MRI(-)/cytology(-)
205.067	2.09	0.875	0.574468	5.2	1	MRI(+)/cytology(+)>MRI(-)/cytology(-)
217.103	22.55	0.875	0.574468	5.73	1	MRI(+)/cytology(+)>MRI(-)/cytology(-)
217.105	16.35	0.875	0.574468	5.4	1	MRI(+)/cytology(+)>MRI(-)/cytology(-)
217.105	22.63	0.875	0.574468	5.78	1	MRI(+)/cytology(+)>MRI(-)/cytology(-)
219.083	1.67	0.875	0.574468	4.915	1	MRI(+)/cytology(+)>MRI(-)/cytology(-)
230.14	18.66	0.875	0.574468	4.455	1	MRI(+)/cytology(+)>MRI(-)/cytology(-)
230.248	9.74	0.875	0.574468	5.89	1	MRI(+)/cytology(+)>MRI(-)/cytology(-)
250.178	11.89	0.875	0.574468	4.14	1	MRI(+)/cytology(+)<MRI(-)/cytology(-)
261.129	16.95	0.875	0.574468	5.03	1	MRI(+)/cytology(+)>MRI(-)/cytology(-)
261.131	18.26	0.875	0.574468	5.54	1	MRI(+)/cytology(+)<MRI(-)/cytology(-)
271.19	11.97	0.875	0.574468	4.91	1	MRI(+)/cytology(+)>MRI(-)/cytology(-)
275.277	9.97	0.875	0.574468	4.38	1	MRI(+)/cytology(+)<MRI(-)/cytology(-)
277.124	8.59	0.875	0.574468	4.05	1	MRI(+)/cytology(+)>MRI(-)/cytology(-)
290.272	10.31	0.875	0.574468	3.64	1	MRI(+)/cytology(+)<MRI(-)/cytology(-)
291.271	9.98	0.875	0.574468	3.165	1	MRI(+)/cytology(+)<MRI(-)/cytology(-)
294.206	14.26	0.875	0.574468	4.83	1	MRI(+)/cytology(+)>MRI(-)/cytology(-)
299.161	14.21	0.875	0.574468	4.95	1	MRI(+)/cytology(+)>MRI(-)/cytology(-)
318.299	10.25	0.875	0.574468	2.78	1	MRI(+)/cytology(+)<MRI(-)/cytology(-)
331.25	11.53	0.875	0.574468	4.81	1	MRI(+)/cytology(+)<MRI(-)/cytology(-)
350.082	8.38	0.875	0.574468	2.355	0	MRI(+)/cytology(+)<MRI(-)/cytology(-)
371.226	9.81	0.875	0.574468	4.03	1	MRI(+)/cytology(+)<MRI(-)/cytology(-)
378.899	1.57	0.875	0.574468	5.19	1	MRI(+)/cytology(+)<MRI(-)/cytology(-)
432.32	14.21	0.875	0.574468	4.61	1	MRI(+)/cytology(+)>MRI(-)/cytology(-)
478.309	9.17	0.875	0.574468	2.95	1	MRI(+)/cytology(+)>MRI(-)/cytology(-)
506.342	9.03	0.875	0.574468	2.13	0	MRI(+)/cytology(+)<MRI(-)/cytology(-)
511.474	9.72	0.875	0.574468	2.225	0	MRI(+)/cytology(+)<MRI(-)/cytology(-)
542.283	8.17	0.875	0.574468	2.975	1	MRI(+)/cytology(+)>MRI(-)/cytology(-)
542.289	8.88	0.875	0.574468	2.745	1	MRI(+)/cytology(+)>MRI(-)/cytology(-)
548.365	8.51	0.875	0.574468	4.72	0	MRI(+)/cytology(+)<MRI(-)/cytology(-)
585.305	9.87	0.875	0.574468	3.02	1	MRI(+)/cytology(+)<MRI(-)/cytology(-)
634.876	20.83	0.875	0.574468	1.535	0	MRI(+)/cytology(+)>MRI(-)/cytology(-)
872.83	1.52	0.875	0.574468	4.89	1	MRI(+)/cytology(+)<MRI(-)/cytology(-)
884.829	1.53	0.875	0.574468	4.73	1	MRI(+)/cytology(+)<MRI(-)/cytology(-)
56.9673	1.37	1	0.446809	4.7	1	MRI(+)/cytology(+)>MRI(-)/cytology(-)
59.0515	19.07	1	0.446809	4.975	1	MRI(+)/cytology(+)>MRI(-)/cytology(-)
59.0517	17.68	1	0.446809	4.555	1	MRI(+)/cytology(+)>MRI(-)/cytology(-)
59.0522	21.42	1	0.446809	5.16	1	MRI(+)/cytology(+)>MRI(-)/cytology(-)
71.9308	23.44	1	0.446809	5.02	1	MRI(+)/cytology(+)>MRI(-)/cytology(-)
86.9928	1.33	1	0.446809	4.955	1	MRI(+)/cytology(+)>MRI(-)/cytology(-)
87.924	23.27	1	0.446809	4.81	1	MRI(+)/cytology(+)>MRI(-)/cytology(-)
102.127	8.79	1	0.446809	5.19	1	MRI(+)/cytology(+)<MRI(-)/cytology(-)
102.127	9.98	1	0.446809	5.515	1	MRI(+)/cytology(+)<MRI(-)/cytology(-)
102.129	18.54	1	0.446809	5.98	1	MRI(+)/cytology(+)<MRI(-)/cytology(-)
124.086	15.89	1	0.446809	4.99	1	MRI(+)/cytology(+)>MRI(-)/cytology(-)
156.012	9.78	1	0.446809	2.35	1	MRI(+)/cytology(+)>MRI(-)/cytology(-)
201.109	8.73	1	0.446809	3.265	1	MRI(+)/cytology(+)>MRI(-)/cytology(-)
228.934	23	1	0.446809	4.22	1	MRI(+)/cytology(+)<MRI(-)/cytology(-)
232.926	22.96	1	0.446809	4.55	1	MRI(+)/cytology(+)>MRI(-)/cytology(-)
274.276	22.63	1	0.446809	4.625	1	MRI(+)/cytology(+)>MRI(-)/cytology(-)
279.159	14.7	1	0.446809	4.7	1	MRI(+)/cytology(+)>MRI(-)/cytology(-)
308.118	8.89	1	0.446809	2.565	0	MRI(+)/cytology(+)>MRI(-)/cytology(-)
328.897	22.98	1	0.446809	4.165	1	MRI(+)/cytology(+)<MRI(-)/cytology(-)
344.874	22.94	1	0.446809	5.86	1	MRI(+)/cytology(+)>MRI(-)/cytology(-)
422.237	14.36	1	0.446809	4.7	1	MRI(+)/cytology(+)>MRI(-)/cytology(-)
437.24	18.36	1	0.446809	4.54	1	MRI(+)/cytology(+)<MRI(-)/cytology(-)
459.861	22.98	1	0.446809	4.17	1	MRI(+)/cytology(+)<MRI(-)/cytology(-)
479.24	8.86	1	0.446809	2.805	1	MRI(+)/cytology(+)>MRI(-)/cytology(-)
505.341	9.32	1	0.446809	3.385	1	MRI(+)/cytology(+)<MRI(-)/cytology(-)
527.143	1.89	1	0.446809	4.62	1	MRI(+)/cytology(+)>MRI(-)/cytology(-)
544.89	1.46	1	0.446809	4.96	1	MRI(+)/cytology(+)<MRI(-)/cytology(-)
593.393	9.94	1	0.446809	2.44	1	MRI(+)/cytology(+)<MRI(-)/cytology(-)
668.865	1.51	1	0.446809	4.47	1	MRI(+)/cytology(+)<MRI(-)/cytology(-)
940.825	1.71	1	0.446809	5.5	1	MRI(+)/cytology(+)>MRI(-)/cytology(-)
1016.79	1.65	1	0.446809	4.95	1	MRI(+)/cytology(+)<MRI(-)/cytology(-)
126.091	8.63	0.5	0.93617	3.405	1	MRI(+)/cytology(+)>MRI(-)/cytology(-)
126.092	8.56	0.5	0.93617	3.615	1	MRI(+)/cytology(+)>MRI(-)/cytology(-)
161.095	14.44	0.5	0.93617	4.115	1	MRI(+)/cytology(+)<MRI(-)/cytology(-)
181.073	8.09	0.5	0.93617	3.355	1	MRI(+)/cytology(+)<MRI(-)/cytology(-)
217.104	16.49	0.5	0.93617	5.49	1	MRI(+)/cytology(+)>MRI(-)/cytology(-)
261.131	16.55	0.5	0.93617	5.76	1	MRI(+)/cytology(+)>MRI(-)/cytology(-)
261.131	16.46	0.5	0.93617	5.335	1	MRI(+)/cytology(+)>MRI(-)/cytology(-)
274.092	4.28	0.5	0.93617	4.425	1	MRI(+)/cytology(+)<MRI(-)/cytology(-)
275.644	8.44	0.5	0.93617	2.19	0	MRI(+)/cytology(+)>MRI(-)/cytology(-)
353.229	11.37	0.5	0.93617	4.96	1	MRI(+)/cytology(+)>MRI(-)/cytology(-)
379.165	8.02	0.5	0.93617	2.91	1	MRI(+)/cytology(+)>MRI(-)/cytology(-)
496.338	14.03	0.5	0.93617	3.605	1	MRI(+)/cytology(+)<MRI(-)/cytology(-)
794.885	8.24	0.5	0.93617	3.505	1	MRI(+)/cytology(+)>MRI(-)/cytology(-)
820.828	1.63	0.5	0.93617	4.29	1	MRI(+)/cytology(+)<MRI(-)/cytology(-)
53.0061	1.81	0.625	0.808511	4.71	1	MRI(+)/cytology(+)>MRI(-)/cytology(-)
102.128	18.34	0.625	0.808511	4.855	1	MRI(+)/cytology(+)<MRI(-)/cytology(-)
126.091	8	0.625	0.808511	3.74	1	MRI(+)/cytology(+)>MRI(-)/cytology(-)
126.092	8.18	0.625	0.808511	3.53	1	MRI(+)/cytology(+)>MRI(-)/cytology(-)
181.071	7.77	0.625	0.808511	3.76	1	MRI(+)/cytology(+)>MRI(-)/cytology(-)
186.222	9.8	0.625	0.808511	4.445	1	MRI(+)/cytology(+)>MRI(-)/cytology(-)
209.061	7.91	0.625	0.808511	3.01	1	MRI(+)/cytology(+)>MRI(-)/cytology(-)
214.254	9.98	0.625	0.808511	3.915	1	MRI(+)/cytology(+)>MRI(-)/cytology(-)
217.105	16.59	0.625	0.808511	5.71	1	MRI(+)/cytology(+)>MRI(-)/cytology(-)
226.18	10.81	0.625	0.808511	3.76	1	MRI(+)/cytology(+)<MRI(-)/cytology(-)
255.065	8.33	0.625	0.808511	2.9	1	MRI(+)/cytology(+)>MRI(-)/cytology(-)
302.304	10.44	0.625	0.808511	5.52	1	MRI(+)/cytology(+)>MRI(-)/cytology(-)
305.156	21.28	0.625	0.808511	4.69	1	MRI(+)/cytology(+)<MRI(-)/cytology(-)
338.341	20.22	0.625	0.808511	4.765	1	MRI(+)/cytology(+)>MRI(-)/cytology(-)
339.249	13.42	0.625	0.808511	4.5	1	MRI(+)/cytology(+)<MRI(-)/cytology(-)
341.303	18.17	0.625	0.808511	4.74	1	MRI(+)/cytology(+)>MRI(-)/cytology(-)
357.261	14.58	0.625	0.808511	4.04	1	MRI(+)/cytology(+)<MRI(-)/cytology(-)
363.22	10.15	0.625	0.808511	3.81	1	MRI(+)/cytology(+)>MRI(-)/cytology(-)
394.288	12.58	0.625	0.808511	3.78	1	MRI(+)/cytology(+)<MRI(-)/cytology(-)
434.28	8.87	0.625	0.808511	3.14	1	MRI(+)/cytology(+)>MRI(-)/cytology(-)
460.306	8.63	0.625	0.808511	3.78	0	MRI(+)/cytology(+)<MRI(-)/cytology(-)
488.182	2.38	0.625	0.808511	1.935	0	MRI(+)/cytology(+)>MRI(-)/cytology(-)
498.899	19.64	0.625	0.808511	1.225	0	MRI(+)/cytology(+)<MRI(-)/cytology(-)
525.289	18.85	0.625	0.808511	5	1	MRI(+)/cytology(+)>MRI(-)/cytology(-)
526.292	13.23	0.625	0.808511	4.45	1	MRI(+)/cytology(+)<MRI(-)/cytology(-)
547.333	9.01	0.625	0.808511	3.845	1	MRI(+)/cytology(+)<MRI(-)/cytology(-)
548.362	9.19	0.625	0.808511	3.79	1	MRI(+)/cytology(+)<MRI(-)/cytology(-)
570.318	8.8	0.625	0.808511	3.78	1	MRI(+)/cytology(+)<MRI(-)/cytology(-)
696.432	8.97	0.625	0.808511	2.93	1	MRI(+)/cytology(+)<MRI(-)/cytology(-)
853.722	21.01	0.625	0.808511	4.125	1	MRI(+)/cytology(+)>MRI(-)/cytology(-)
854.726	20.13	0.625	0.808511	4.32	1	MRI(+)/cytology(+)>MRI(-)/cytology(-)
66.0212	22.94	0.75	0.680851	4.28	1	MRI(+)/cytology(+)>MRI(-)/cytology(-)
70.067	2.29	0.75	0.680851	3.72	1	MRI(+)/cytology(+)>MRI(-)/cytology(-)
72.9386	23.53	0.75	0.680851	6.11	1	MRI(+)/cytology(+)>MRI(-)/cytology(-)
102.127	25.23	0.75	0.680851	4.72	1	MRI(+)/cytology(+)<MRI(-)/cytology(-)
102.129	2.1	0.75	0.680851	4.535	1	MRI(+)/cytology(+)<MRI(-)/cytology(-)
102.129	10.61	0.75	0.680851	5.275	1	MRI(+)/cytology(+)<MRI(-)/cytology(-)
140.995	23.03	0.75	0.680851	4.88	1	MRI(+)/cytology(+)>MRI(-)/cytology(-)
141.957	23.54	0.75	0.680851	5.145	1	MRI(+)/cytology(+)>MRI(-)/cytology(-)
154.086	8.45	0.75	0.680851	2.98	0	MRI(+)/cytology(+)>MRI(-)/cytology(-)
155.089	8	0.75	0.680851	3.47	1	MRI(+)/cytology(+)>MRI(-)/cytology(-)
200.238	10.62	0.75	0.680851	3.16	1	MRI(+)/cytology(+)<MRI(-)/cytology(-)
213.112	20.1	0.75	0.680851	4.39	1	MRI(+)/cytology(+)>MRI(-)/cytology(-)
218.909	22.96	0.75	0.680851	5.19	1	MRI(+)/cytology(+)>MRI(-)/cytology(-)
239.151	16.82	0.75	0.680851	5.23	1	MRI(+)/cytology(+)>MRI(-)/cytology(-)
249.114	8.2	0.75	0.680851	2.785	1	MRI(+)/cytology(+)>MRI(-)/cytology(-)
261.132	19.31	0.75	0.680851	5.79	1	MRI(+)/cytology(+)>MRI(-)/cytology(-)
271.188	11.9	0.75	0.680851	4.85	1	MRI(+)/cytology(+)>MRI(-)/cytology(-)
276.28	9.67	0.75	0.680851	4.57	1	MRI(+)/cytology(+)>MRI(-)/cytology(-)
277.142	18.86	0.75	0.680851	4.48	1	MRI(+)/cytology(+)>MRI(-)/cytology(-)
295.226	12.1	0.75	0.680851	4.46	1	MRI(+)/cytology(+)<MRI(-)/cytology(-)
302.142	15	0.75	0.680851	4.205	1	MRI(+)/cytology(+)<MRI(-)/cytology(-)
302.307	10.45	0.75	0.680851	5.53	1	MRI(+)/cytology(+)>MRI(-)/cytology(-)
311.294	16.5	0.75	0.680851	4.785	1	MRI(+)/cytology(+)>MRI(-)/cytology(-)
336.327	18.27	0.75	0.680851	4.185	1	MRI(+)/cytology(+)>MRI(-)/cytology(-)
337.234	17.3	0.75	0.680851	5.46	1	MRI(+)/cytology(+)>MRI(-)/cytology(-)
387.105	2.15	0.75	0.680851	4.335	1	MRI(+)/cytology(+)>MRI(-)/cytology(-)
389.12	2.12	0.75	0.680851	3.245	1	MRI(+)/cytology(+)>MRI(-)/cytology(-)
403.232	15.49	0.75	0.680851	4.625	1	MRI(+)/cytology(+)>MRI(-)/cytology(-)
477.381	12.58	0.75	0.680851	3.665	1	MRI(+)/cytology(+)<MRI(-)/cytology(-)
482.264	8.2	0.75	0.680851	2.885	1	MRI(+)/cytology(+)>MRI(-)/cytology(-)
492.298	8.35	0.75	0.680851	4.325	1	MRI(+)/cytology(+)<MRI(-)/cytology(-)
503.297	13.35	0.75	0.680851	4.305	1	MRI(+)/cytology(+)<MRI(-)/cytology(-)
523.269	8.23	0.75	0.680851	2.69	0	MRI(+)/cytology(+)>MRI(-)/cytology(-)
541.273	8.48	0.75	0.680851	3.71	0	MRI(+)/cytology(+)<MRI(-)/cytology(-)
566.358	8.58	0.75	0.680851	3.97	1	MRI(+)/cytology(+)<MRI(-)/cytology(-)
581.357	8.43	0.75	0.680851	3.66	0	MRI(+)/cytology(+)<MRI(-)/cytology(-)
582.863	1.57	0.75	0.680851	5.32	1	MRI(+)/cytology(+)<MRI(-)/cytology(-)
634.875	21.14	0.75	0.680851	1.45	0	MRI(+)/cytology(+)<MRI(-)/cytology(-)
635.381	8.6	0.75	0.680851	4.435	1	MRI(+)/cytology(+)<MRI(-)/cytology(-)
853.72	18.13	0.75	0.680851	4.25	1	MRI(+)/cytology(+)>MRI(-)/cytology(-)
53.0052	2.27	0.875	0.553191	4.93	1	MRI(+)/cytology(+)>MRI(-)/cytology(-)
56.9667	22.94	0.875	0.553191	5.4	1	MRI(+)/cytology(+)>MRI(-)/cytology(-)
59.0516	20.5	0.875	0.553191	5.34	1	MRI(+)/cytology(+)>MRI(-)/cytology(-)
59.0526	19.77	0.875	0.553191	5.02	1	MRI(+)/cytology(+)>MRI(-)/cytology(-)
68.9949	23.54	0.875	0.553191	5.71	1	MRI(+)/cytology(+)>MRI(-)/cytology(-)
71.9539	1.33	0.875	0.553191	5.03	1	MRI(+)/cytology(+)>MRI(-)/cytology(-)
73.945	23.5	0.875	0.553191	5.29	1	MRI(+)/cytology(+)>MRI(-)/cytology(-)
73.946	23.47	0.875	0.553191	5.23	1	MRI(+)/cytology(+)>MRI(-)/cytology(-)
75.9462	23.01	0.875	0.553191	4.915	1	MRI(+)/cytology(+)>MRI(-)/cytology(-)
77.9424	23.04	0.875	0.553191	4.445	1	MRI(+)/cytology(+)>MRI(-)/cytology(-)
87.9246	23.51	0.875	0.553191	5.81	1	MRI(+)/cytology(+)>MRI(-)/cytology(-)
88.9323	23.55	0.875	0.553191	5.875	1	MRI(+)/cytology(+)>MRI(-)/cytology(-)
88.9535	22.96	0.875	0.553191	4.21	1	MRI(+)/cytology(+)>MRI(-)/cytology(-)
91.0545	20.49	0.875	0.553191	4.615	1	MRI(+)/cytology(+)>MRI(-)/cytology(-)
97.9688	23.52	0.875	0.553191	5.76	1	MRI(+)/cytology(+)>MRI(-)/cytology(-)
98.9614	23.05	0.875	0.553191	5.74	1	MRI(+)/cytology(+)>MRI(-)/cytology(-)
100.954	23.09	0.875	0.553191	5.22	1	MRI(+)/cytology(+)>MRI(-)/cytology(-)
100.956	23.03	0.875	0.553191	5.39	1	MRI(+)/cytology(+)>MRI(-)/cytology(-)
102.126	15.98	0.875	0.553191	4.405	1	MRI(+)/cytology(+)<MRI(-)/cytology(-)
102.127	15.18	0.875	0.553191	4.455	1	MRI(+)/cytology(+)<MRI(-)/cytology(-)
102.127	16.06	0.875	0.553191	5.055	1	MRI(+)/cytology(+)<MRI(-)/cytology(-)
102.128	17.42	0.875	0.553191	5.55	1	MRI(+)/cytology(+)<MRI(-)/cytology(-)
102.129	17.84	0.875	0.553191	5.63	1	MRI(+)/cytology(+)<MRI(-)/cytology(-)
102.129	8.97	0.875	0.553191	5.19	1	MRI(+)/cytology(+)<MRI(-)/cytology(-)
102.129	19.27	0.875	0.553191	5.785	1	MRI(+)/cytology(+)<MRI(-)/cytology(-)
103.954	23.47	0.875	0.553191	4.47	1	MRI(+)/cytology(+)>MRI(-)/cytology(-)
105.935	23.54	0.875	0.553191	5.08	1	MRI(+)/cytology(+)>MRI(-)/cytology(-)
109.943	23.57	0.875	0.553191	5.36	1	MRI(+)/cytology(+)>MRI(-)/cytology(-)
110.059	8.19	0.875	0.553191	2.955	1	MRI(+)/cytology(+)>MRI(-)/cytology(-)
113.053	2.36	0.875	0.553191	3.51	1	MRI(+)/cytology(+)>MRI(-)/cytology(-)
113.962	23.51	0.875	0.553191	6.19	1	MRI(+)/cytology(+)>MRI(-)/cytology(-)
124.087	15.82	0.875	0.553191	5.26	1	MRI(+)/cytology(+)>MRI(-)/cytology(-)
166.097	19.45	0.875	0.553191	4.92	1	MRI(+)/cytology(+)>MRI(-)/cytology(-)
173.078	18.77	0.875	0.553191	4.71	1	MRI(+)/cytology(+)>MRI(-)/cytology(-)
188.072	9.6	0.875	0.553191	2.58	1	MRI(+)/cytology(+)>MRI(-)/cytology(-)
213.113	22.62	0.875	0.553191	4.665	1	MRI(+)/cytology(+)>MRI(-)/cytology(-)
214.265	22.91	0.875	0.553191	4.24	1	MRI(+)/cytology(+)>MRI(-)/cytology(-)
215.123	8.78	0.875	0.553191	3.75	1	MRI(+)/cytology(+)>MRI(-)/cytology(-)
215.125	8.61	0.875	0.553191	3.75	1	MRI(+)/cytology(+)<MRI(-)/cytology(-)
217.105	22.61	0.875	0.553191	5.7	1	MRI(+)/cytology(+)>MRI(-)/cytology(-)
217.106	16.38	0.875	0.553191	5.45	1	MRI(+)/cytology(+)>MRI(-)/cytology(-)
233.896	23	0.875	0.553191	4.6	1	MRI(+)/cytology(+)>MRI(-)/cytology(-)
239.148	18.76	0.875	0.553191	5.38	1	MRI(+)/cytology(+)>MRI(-)/cytology(-)
247.247	9.46	0.875	0.553191	3.39	1	MRI(+)/cytology(+)<MRI(-)/cytology(-)
261.13	22.34	0.875	0.553191	5.665	1	MRI(+)/cytology(+)>MRI(-)/cytology(-)
262.134	18.61	0.875	0.553191	4.64	1	MRI(+)/cytology(+)>MRI(-)/cytology(-)
263.074	2.08	0.875	0.553191	4.37	1	MRI(+)/cytology(+)<MRI(-)/cytology(-)
277.181	12.14	0.875	0.553191	5.08	1	MRI(+)/cytology(+)>MRI(-)/cytology(-)
280.264	13.58	0.875	0.553191	3.78	1	MRI(+)/cytology(+)>MRI(-)/cytology(-)
284.208	8.51	0.875	0.553191	3.125	1	MRI(+)/cytology(+)>MRI(-)/cytology(-)
291.889	23.07	0.875	0.553191	4.7	1	MRI(+)/cytology(+)>MRI(-)/cytology(-)
296.156	8.37	0.875	0.553191	3	1	MRI(+)/cytology(+)>MRI(-)/cytology(-)
296.185	8.64	0.875	0.553191	3.44	1	MRI(+)/cytology(+)<MRI(-)/cytology(-)
338.342	20.49	0.875	0.553191	4.8	1	MRI(+)/cytology(+)<MRI(-)/cytology(-)
349.184	22.32	0.875	0.553191	5.4	1	MRI(+)/cytology(+)>MRI(-)/cytology(-)
365.223	10.15	0.875	0.553191	3.66	1	MRI(+)/cytology(+)>MRI(-)/cytology(-)
371.328	12.34	0.875	0.553191	4.77	1	MRI(+)/cytology(+)>MRI(-)/cytology(-)
375.322	17.75	0.875	0.553191	4.45	1	MRI(+)/cytology(+)>MRI(-)/cytology(-)
389.255	8.96	0.875	0.553191	3.54	1	MRI(+)/cytology(+)<MRI(-)/cytology(-)
413.266	19.08	0.875	0.553191	4.7	1	MRI(+)/cytology(+)>MRI(-)/cytology(-)
433.286	9.84	0.875	0.553191	4.02	1	MRI(+)/cytology(+)<MRI(-)/cytology(-)
438.236	8.99	0.875	0.553191	3.78	1	MRI(+)/cytology(+)<MRI(-)/cytology(-)
460.283	8.49	0.875	0.553191	4	1	MRI(+)/cytology(+)<MRI(-)/cytology(-)
504.328	8.47	0.875	0.553191	4.525	1	MRI(+)/cytology(+)<MRI(-)/cytology(-)
539.813	23.02	0.875	0.553191	3.48	1	MRI(+)/cytology(+)<MRI(-)/cytology(-)
541.256	8.53	0.875	0.553191	3.395	0	MRI(+)/cytology(+)<MRI(-)/cytology(-)
547.329	9.24	0.875	0.553191	3.75	1	MRI(+)/cytology(+)<MRI(-)/cytology(-)
548.333	8.51	0.875	0.553191	4.1	0	MRI(+)/cytology(+)<MRI(-)/cytology(-)
591.357	9.15	0.875	0.553191	3.275	1	MRI(+)/cytology(+)>MRI(-)/cytology(-)
608.783	22.97	0.875	0.553191	4.365	1	MRI(+)/cytology(+)>MRI(-)/cytology(-)
652.409	9.99	0.875	0.553191	3.195	1	MRI(+)/cytology(+)<MRI(-)/cytology(-)
685.437	17.78	0.875	0.553191	4.795	1	MRI(+)/cytology(+)>MRI(-)/cytology(-)
685.44	17.97	0.875	0.553191	4.8	1	MRI(+)/cytology(+)>MRI(-)/cytology(-)
853.722	18.54	0.875	0.553191	3.875	1	MRI(+)/cytology(+)>MRI(-)/cytology(-)
72.9384	23.7	1	0.425532	5.305	1	MRI(+)/cytology(+)>MRI(-)/cytology(-)
73.9464	23.62	1	0.425532	4.63	1	MRI(+)/cytology(+)>MRI(-)/cytology(-)
81.5221	22.91	1	0.425532	2.995	1	MRI(+)/cytology(+)>MRI(-)/cytology(-)
81.9383	23.7	1	0.425532	5.25	1	MRI(+)/cytology(+)>MRI(-)/cytology(-)
81.9389	23.43	1	0.425532	6.005	1	MRI(+)/cytology(+)>MRI(-)/cytology(-)
85.0406	17.41	1	0.425532	3.21	1	MRI(+)/cytology(+)>MRI(-)/cytology(-)
87.9956	1.32	1	0.425532	4.11	1	MRI(+)/cytology(+)>MRI(-)/cytology(-)
100.955	23.06	1	0.425532	5.14	1	MRI(+)/cytology(+)>MRI(-)/cytology(-)
102.128	18.96	1	0.425532	5.45	1	MRI(+)/cytology(+)<MRI(-)/cytology(-)
102.128	20.29	1	0.425532	5.91	1	MRI(+)/cytology(+)<MRI(-)/cytology(-)
102.129	19.73	1	0.425532	5.75	1	MRI(+)/cytology(+)<MRI(-)/cytology(-)
102.129	10.41	1	0.425532	5.33	1	MRI(+)/cytology(+)<MRI(-)/cytology(-)
102.129	9.69	1	0.425532	5.25	1	MRI(+)/cytology(+)<MRI(-)/cytology(-)
102.129	20.74	1	0.425532	5.53	1	MRI(+)/cytology(+)<MRI(-)/cytology(-)
103.055	7.65	1	0.425532	3.72	1	MRI(+)/cytology(+)>MRI(-)/cytology(-)
107.085	1.88	1	0.425532	5.325	1	MRI(+)/cytology(+)>MRI(-)/cytology(-)
121.084	7.37	1	0.425532	3.49	1	MRI(+)/cytology(+)>MRI(-)/cytology(-)
122.964	23.48	1	0.425532	6.36	1	MRI(+)/cytology(+)>MRI(-)/cytology(-)
141.957	23.14	1	0.425532	4.4	1	MRI(+)/cytology(+)>MRI(-)/cytology(-)
141.958	23.17	1	0.425532	4.61	1	MRI(+)/cytology(+)>MRI(-)/cytology(-)
141.958	23.2	1	0.425532	4.76	1	MRI(+)/cytology(+)>MRI(-)/cytology(-)
158.964	1.58	1	0.425532	5.765	1	MRI(+)/cytology(+)<MRI(-)/cytology(-)
198.94	22.98	1	0.425532	5.275	1	MRI(+)/cytology(+)<MRI(-)/cytology(-)
199.942	22.96	1	0.425532	4.37	1	MRI(+)/cytology(+)<MRI(-)/cytology(-)
201.109	8.65	1	0.425532	3.31	1	MRI(+)/cytology(+)>MRI(-)/cytology(-)
227.957	1.61	1	0.425532	4.82	1	MRI(+)/cytology(+)<MRI(-)/cytology(-)
240.097	8.51	1	0.425532	3.44	1	MRI(+)/cytology(+)>MRI(-)/cytology(-)
250.865	23	1	0.425532	5.09	1	MRI(+)/cytology(+)>MRI(-)/cytology(-)
261.132	22.84	1	0.425532	5.025	1	MRI(+)/cytology(+)<MRI(-)/cytology(-)
275.915	23.02	1	0.425532	4.335	1	MRI(+)/cytology(+)>MRI(-)/cytology(-)
283.173	8.52	1	0.425532	3.88	1	MRI(+)/cytology(+)>MRI(-)/cytology(-)
283.177	8.83	1	0.425532	4.18	1	MRI(+)/cytology(+)>MRI(-)/cytology(-)
284.205	8	1	0.425532	2.695	1	MRI(+)/cytology(+)>MRI(-)/cytology(-)
305.158	8.91	1	0.425532	4.04	1	MRI(+)/cytology(+)>MRI(-)/cytology(-)
315.196	13.72	1	0.425532	4.44	1	MRI(+)/cytology(+)>MRI(-)/cytology(-)
340.208	8.92	1	0.425532	3.34	1	MRI(+)/cytology(+)>MRI(-)/cytology(-)
344.878	22.98	1	0.425532	5.56	1	MRI(+)/cytology(+)<MRI(-)/cytology(-)
365.178	8.72	1	0.425532	3.84	1	MRI(+)/cytology(+)>MRI(-)/cytology(-)
400.256	14.38	1	0.425532	4.555	1	MRI(+)/cytology(+)>MRI(-)/cytology(-)
482.829	22.68	1	0.425532	4.16	1	MRI(+)/cytology(+)>MRI(-)/cytology(-)
500.904	1.63	1	0.425532	4.77	1	MRI(+)/cytology(+)<MRI(-)/cytology(-)
560.769	23.02	1	0.425532	3.45	1	MRI(+)/cytology(+)<MRI(-)/cytology(-)
570.32	9.4	1	0.425532	3.66	1	MRI(+)/cytology(+)<MRI(-)/cytology(-)
588.822	22.94	1	0.425532	4.35	1	MRI(+)/cytology(+)>MRI(-)/cytology(-)
593.388	9.41	1	0.425532	2.75	1	MRI(+)/cytology(+)<MRI(-)/cytology(-)
604.784	23	1	0.425532	4.57	1	MRI(+)/cytology(+)<MRI(-)/cytology(-)
608.382	9.27	1	0.425532	4.1	1	MRI(+)/cytology(+)<MRI(-)/cytology(-)
611.395	8.92	1	0.425532	1.025	0	MRI(+)/cytology(+)>MRI(-)/cytology(-)
613.77	23	1	0.425532	4.24	1	MRI(+)/cytology(+)<MRI(-)/cytology(-)
613.795	22.94	1	0.425532	4.165	1	MRI(+)/cytology(+)>MRI(-)/cytology(-)
623.305	13.81	1	0.425532	3.63	1	MRI(+)/cytology(+)>MRI(-)/cytology(-)
637.426	8.67	1	0.425532	4.8	0	MRI(+)/cytology(+)<MRI(-)/cytology(-)
679.408	9.13	1	0.425532	2.19	0	MRI(+)/cytology(+)>MRI(-)/cytology(-)
680.447	8.93	1	0.425532	2.89	1	MRI(+)/cytology(+)>MRI(-)/cytology(-)
680.862	1.52	1	0.425532	4.985	1	MRI(+)/cytology(+)<MRI(-)/cytology(-)
685.436	19.08	1	0.425532	4.345	1	MRI(+)/cytology(+)<MRI(-)/cytology(-)
702.863	20.69	1	0.425532	1.41	0	MRI(+)/cytology(+)>MRI(-)/cytology(-)
745.425	8.77	1	0.425532	4.46	1	MRI(+)/cytology(+)<MRI(-)/cytology(-)
805.333	1.67	1	0.425532	5.09	1	MRI(+)/cytology(+)>MRI(-)/cytology(-)
812.834	1.6	1	0.425532	5.19	1	MRI(+)/cytology(+)<MRI(-)/cytology(-)
1043.81	1.67	1	0.425532	5.04	1	MRI(+)/cytology(+)>MRI(-)/cytology(-)
59.0513	24.17	0.5	0.914894	5.385	1	MRI(+)/cytology(+)>MRI(-)/cytology(-)
102.091	19.82	0.5	0.914894	3.915	1	MRI(+)/cytology(+)<MRI(-)/cytology(-)
102.129	8.27	0.5	0.914894	4.32	1	MRI(+)/cytology(+)<MRI(-)/cytology(-)
126.091	8.66	0.5	0.914894	3.475	1	MRI(+)/cytology(+)>MRI(-)/cytology(-)
144.102	2.33	0.5	0.914894	3.17	1	MRI(+)/cytology(+)<MRI(-)/cytology(-)
171.113	8.47	0.5	0.914894	4.115	1	MRI(+)/cytology(+)>MRI(-)/cytology(-)
195.137	11.07	0.5	0.914894	4.36	1	MRI(+)/cytology(+)<MRI(-)/cytology(-)
200.237	9.87	0.5	0.914894	4.605	1	MRI(+)/cytology(+)>MRI(-)/cytology(-)
220.068	8.89	0.5	0.914894	2.48	0	MRI(+)/cytology(+)>MRI(-)/cytology(-)
235.18	8.2	0.5	0.914894	3.62	1	MRI(+)/cytology(+)<MRI(-)/cytology(-)
241.178	10.88	0.5	0.914894	3.56	1	MRI(+)/cytology(+)<MRI(-)/cytology(-)
261.131	22.19	0.5	0.914894	5.15	1	MRI(+)/cytology(+)>MRI(-)/cytology(-)
329.193	8.52	0.5	0.914894	4.51	1	MRI(+)/cytology(+)>MRI(-)/cytology(-)
340.179	8.48	0.5	0.914894	4.74	1	MRI(+)/cytology(+)>MRI(-)/cytology(-)
485.288	15.66	0.5	0.914894	4.29	1	MRI(+)/cytology(+)<MRI(-)/cytology(-)
594.393	8.68	0.5	0.914894	1.795	0	MRI(+)/cytology(+)<MRI(-)/cytology(-)
718.83	1.59	0.5	0.914894	5.12	1	MRI(+)/cytology(+)<MRI(-)/cytology(-)
778.861	8.24	0.5	0.914894	3.535	1	MRI(+)/cytology(+)>MRI(-)/cytology(-)
60.0467	18.04	0.625	0.787234	4.92	1	MRI(+)/cytology(+)>MRI(-)/cytology(-)
91.055	18.89	0.625	0.787234	4.495	1	MRI(+)/cytology(+)<MRI(-)/cytology(-)
102.129	22.04	0.625	0.787234	5.61	1	MRI(+)/cytology(+)<MRI(-)/cytology(-)
130.158	9.52	0.625	0.787234	3.12	1	MRI(+)/cytology(+)<MRI(-)/cytology(-)
162.111	1.81	0.625	0.787234	4.555	1	MRI(+)/cytology(+)>MRI(-)/cytology(-)
165.076	2.09	0.625	0.787234	3.86	1	MRI(+)/cytology(+)>MRI(-)/cytology(-)
171.112	8.42	0.625	0.787234	3.635	1	MRI(+)/cytology(+)>MRI(-)/cytology(-)
173.077	21.71	0.625	0.787234	5	1	MRI(+)/cytology(+)>MRI(-)/cytology(-)
190.097	9.66	0.625	0.787234	2.84	1	MRI(+)/cytology(+)<MRI(-)/cytology(-)
202.215	10.13	0.625	0.787234	3.46	1	MRI(+)/cytology(+)>MRI(-)/cytology(-)
217.105	18	0.625	0.787234	5.42	1	MRI(+)/cytology(+)>MRI(-)/cytology(-)
220.07	8.82	0.625	0.787234	2.57	1	MRI(+)/cytology(+)>MRI(-)/cytology(-)
222.909	22.93	0.625	0.787234	4.25	1	MRI(+)/cytology(+)>MRI(-)/cytology(-)
226.95	18.14	0.625	0.787234	2.805	1	MRI(+)/cytology(+)<MRI(-)/cytology(-)
229.142	9.77	0.625	0.787234	4.55	1	MRI(+)/cytology(+)>MRI(-)/cytology(-)
230.209	8.62	0.625	0.787234	2.52	1	MRI(+)/cytology(+)<MRI(-)/cytology(-)
239.148	18.61	0.625	0.787234	5.525	1	MRI(+)/cytology(+)>MRI(-)/cytology(-)
262.238	9.21	0.625	0.787234	3.115	1	MRI(+)/cytology(+)<MRI(-)/cytology(-)
275.275	9.74	0.625	0.787234	5.7	1	MRI(+)/cytology(+)>MRI(-)/cytology(-)
283.176	19.58	0.625	0.787234	5.05	1	MRI(+)/cytology(+)>MRI(-)/cytology(-)
290.268	9.99	0.625	0.787234	4.09	1	MRI(+)/cytology(+)<MRI(-)/cytology(-)
295.191	12.81	0.625	0.787234	4.675	1	MRI(+)/cytology(+)<MRI(-)/cytology(-)
303.31	10.75	0.625	0.787234	3.39	1	MRI(+)/cytology(+)<MRI(-)/cytology(-)
305.158	17.19	0.625	0.787234	5.26	1	MRI(+)/cytology(+)>MRI(-)/cytology(-)
318.168	8.84	0.625	0.787234	3.69	1	MRI(+)/cytology(+)<MRI(-)/cytology(-)
353.232	11.38	0.625	0.787234	4.96	1	MRI(+)/cytology(+)>MRI(-)/cytology(-)
371.328	12.35	0.625	0.787234	4.44	1	MRI(+)/cytology(+)<MRI(-)/cytology(-)
393.286	12.59	0.625	0.787234	4.585	1	MRI(+)/cytology(+)<MRI(-)/cytology(-)
394.131	8.45	0.625	0.787234	1.83	0	MRI(+)/cytology(+)<MRI(-)/cytology(-)
411.094	14.97	0.625	0.787234	3.49	1	MRI(+)/cytology(+)<MRI(-)/cytology(-)
421.317	12.49	0.625	0.787234	4.08	1	MRI(+)/cytology(+)<MRI(-)/cytology(-)
460.31	8.52	0.625	0.787234	4.525	1	MRI(+)/cytology(+)<MRI(-)/cytology(-)
500.276	12.73	0.625	0.787234	2.76	1	MRI(+)/cytology(+)<MRI(-)/cytology(-)
519.436	13.34	0.625	0.787234	1.595	0	MRI(+)/cytology(+)<MRI(-)/cytology(-)
522.354	14.22	0.625	0.787234	4.035	1	MRI(+)/cytology(+)<MRI(-)/cytology(-)
545.344	13.35	0.625	0.787234	2.965	1	MRI(+)/cytology(+)<MRI(-)/cytology(-)
633.152	18.64	0.625	0.787234	4.685	1	MRI(+)/cytology(+)>MRI(-)/cytology(-)
657.364	9.3	0.625	0.787234	3.09	1	MRI(+)/cytology(+)<MRI(-)/cytology(-)
764.577	19.38	0.625	0.787234	3.385	1	MRI(+)/cytology(+)<MRI(-)/cytology(-)
795.792	18.59	0.625	0.787234	3.955	1	MRI(+)/cytology(+)>MRI(-)/cytology(-)
853.729	20.13	0.625	0.787234	4.405	1	MRI(+)/cytology(+)>MRI(-)/cytology(-)
854.732	19.23	0.625	0.787234	3.98	1	MRI(+)/cytology(+)>MRI(-)/cytology(-)
854.732	21.01	0.625	0.787234	4.015	1	MRI(+)/cytology(+)>MRI(-)/cytology(-)
76.4879	23.4	0.75	0.659574	4.87	1	MRI(+)/cytology(+)>MRI(-)/cytology(-)
84.9947	23.07	0.75	0.659574	4.555	1	MRI(+)/cytology(+)>MRI(-)/cytology(-)
90.5082	23.04	0.75	0.659574	4.09	1	MRI(+)/cytology(+)>MRI(-)/cytology(-)
91.0544	20.7	0.75	0.659574	5.26	1	MRI(+)/cytology(+)>MRI(-)/cytology(-)
102.127	1.83	0.75	0.659574	5.005	1	MRI(+)/cytology(+)<MRI(-)/cytology(-)
102.129	8.34	0.75	0.659574	4.635	1	MRI(+)/cytology(+)<MRI(-)/cytology(-)
102.129	23.25	0.75	0.659574	5.26	1	MRI(+)/cytology(+)<MRI(-)/cytology(-)
102.129	23.21	0.75	0.659574	4.975	1	MRI(+)/cytology(+)<MRI(-)/cytology(-)
112.957	23.55	0.75	0.659574	5.345	1	MRI(+)/cytology(+)>MRI(-)/cytology(-)
120.08	9.47	0.75	0.659574	2.84	1	MRI(+)/cytology(+)<MRI(-)/cytology(-)
124.087	19.48	0.75	0.659574	5.85	1	MRI(+)/cytology(+)<MRI(-)/cytology(-)
136.113	22.68	0.75	0.659574	4.35	1	MRI(+)/cytology(+)>MRI(-)/cytology(-)
158.153	11.92	0.75	0.659574	5.38	1	MRI(+)/cytology(+)<MRI(-)/cytology(-)
158.153	11.8	0.75	0.659574	5.385	1	MRI(+)/cytology(+)>MRI(-)/cytology(-)
159.077	1.97	0.75	0.659574	3.88	1	MRI(+)/cytology(+)<MRI(-)/cytology(-)
166.086	8.33	0.75	0.659574	3.6	1	MRI(+)/cytology(+)>MRI(-)/cytology(-)
166.098	18.64	0.75	0.659574	5.16	1	MRI(+)/cytology(+)>MRI(-)/cytology(-)
171.1	19.7	0.75	0.659574	4.09	1	MRI(+)/cytology(+)<MRI(-)/cytology(-)
174.187	8.54	0.75	0.659574	3	0	MRI(+)/cytology(+)<MRI(-)/cytology(-)
174.937	1.57	0.75	0.659574	4.82	1	MRI(+)/cytology(+)<MRI(-)/cytology(-)
195.122	18.74	0.75	0.659574	5.29	1	MRI(+)/cytology(+)>MRI(-)/cytology(-)
202.063	2.15	0.75	0.659574	3.87	1	MRI(+)/cytology(+)>MRI(-)/cytology(-)
203.217	9.04	0.75	0.659574	3.84	1	MRI(+)/cytology(+)<MRI(-)/cytology(-)
204.056	2.05	0.75	0.659574	4.95	1	MRI(+)/cytology(+)<MRI(-)/cytology(-)
217.104	19.66	0.75	0.659574	5.365	1	MRI(+)/cytology(+)<MRI(-)/cytology(-)
217.104	22.47	0.75	0.659574	5.82	1	MRI(+)/cytology(+)>MRI(-)/cytology(-)
228.195	11.54	0.75	0.659574	4.915	1	MRI(+)/cytology(+)>MRI(-)/cytology(-)
231.252	9.68	0.75	0.659574	3.62	0	MRI(+)/cytology(+)>MRI(-)/cytology(-)
239.149	17.46	0.75	0.659574	5.34	1	MRI(+)/cytology(+)>MRI(-)/cytology(-)
247.166	22.05	0.75	0.659574	4.405	1	MRI(+)/cytology(+)>MRI(-)/cytology(-)
262.133	20.01	0.75	0.659574	4.68	1	MRI(+)/cytology(+)>MRI(-)/cytology(-)
274.274	9.74	0.75	0.659574	6.25	1	MRI(+)/cytology(+)>MRI(-)/cytology(-)
284.206	7.67	0.75	0.659574	2.56	1	MRI(+)/cytology(+)>MRI(-)/cytology(-)
325.272	17.29	0.75	0.659574	4.59	1	MRI(+)/cytology(+)>MRI(-)/cytology(-)
345.204	10.8	0.75	0.659574	3.34	1	MRI(+)/cytology(+)<MRI(-)/cytology(-)
366.186	8.49	0.75	0.659574	3.515	1	MRI(+)/cytology(+)>MRI(-)/cytology(-)
371.161	20.04	0.75	0.659574	4.205	1	MRI(+)/cytology(+)>MRI(-)/cytology(-)
374.823	22.99	0.75	0.659574	4.14	1	MRI(+)/cytology(+)>MRI(-)/cytology(-)
376.32	17.06	0.75	0.659574	4.25	1	MRI(+)/cytology(+)>MRI(-)/cytology(-)
408.914	8.21	0.75	0.659574	2.21	0	MRI(+)/cytology(+)<MRI(-)/cytology(-)
416.285	8.39	0.75	0.659574	5.25	1	MRI(+)/cytology(+)<MRI(-)/cytology(-)
430.924	8.11	0.75	0.659574	2.63	1	MRI(+)/cytology(+)<MRI(-)/cytology(-)
461.308	8.45	0.75	0.659574	3.205	0	MRI(+)/cytology(+)<MRI(-)/cytology(-)
477.306	8.94	0.75	0.659574	4.08	1	MRI(+)/cytology(+)<MRI(-)/cytology(-)
479.321	11.53	0.75	0.659574	2.685	1	MRI(+)/cytology(+)<MRI(-)/cytology(-)
499.903	1.62	0.75	0.659574	5.02	1	MRI(+)/cytology(+)<MRI(-)/cytology(-)
520.33	9.91	0.75	0.659574	4.48	1	MRI(+)/cytology(+)<MRI(-)/cytology(-)
528.289	8.83	0.75	0.659574	2.21	0	MRI(+)/cytology(+)>MRI(-)/cytology(-)
541.813	22.98	0.75	0.659574	4.09	1	MRI(+)/cytology(+)>MRI(-)/cytology(-)
568.886	1.61	0.75	0.659574	4.89	1	MRI(+)/cytology(+)<MRI(-)/cytology(-)
585.295	8.56	0.75	0.659574	4.555	1	MRI(+)/cytology(+)<MRI(-)/cytology(-)
624.386	8.47	0.75	0.659574	4.02	1	MRI(+)/cytology(+)<MRI(-)/cytology(-)
634.15	18.64	0.75	0.659574	3.97	1	MRI(+)/cytology(+)>MRI(-)/cytology(-)
695.188	1.94	0.75	0.659574	4.125	1	MRI(+)/cytology(+)>MRI(-)/cytology(-)
702.862	22.05	0.75	0.659574	1.93	0	MRI(+)/cytology(+)>MRI(-)/cytology(-)
734.751	22.94	0.75	0.659574	4.49	1	MRI(+)/cytology(+)>MRI(-)/cytology(-)
853.722	19.46	0.75	0.659574	3.805	1	MRI(+)/cytology(+)>MRI(-)/cytology(-)
854.728	19.63	0.75	0.659574	3.745	1	MRI(+)/cytology(+)>MRI(-)/cytology(-)
906.825	22.26	0.75	0.659574	3.16	0	MRI(+)/cytology(+)>MRI(-)/cytology(-)
1016.79	1.62	0.75	0.659574	4.77	1	MRI(+)/cytology(+)<MRI(-)/cytology(-)
59.0522	21.54	0.875	0.531915	4.875	1	MRI(+)/cytology(+)>MRI(-)/cytology(-)
68.9948	23.75	0.875	0.531915	5.37	1	MRI(+)/cytology(+)>MRI(-)/cytology(-)
68.995	23.67	0.875	0.531915	4.565	1	MRI(+)/cytology(+)>MRI(-)/cytology(-)
68.9959	23.64	0.875	0.531915	4.715	1	MRI(+)/cytology(+)>MRI(-)/cytology(-)
68.996	23.63	0.875	0.531915	4.93	1	MRI(+)/cytology(+)>MRI(-)/cytology(-)
71.9537	22.95	0.875	0.531915	5.87	1	MRI(+)/cytology(+)>MRI(-)/cytology(-)
79.9416	23.45	0.875	0.531915	4.96	1	MRI(+)/cytology(+)>MRI(-)/cytology(-)
79.9433	23.51	0.875	0.531915	5.065	1	MRI(+)/cytology(+)>MRI(-)/cytology(-)
81.9389	23.48	0.875	0.531915	6.22	1	MRI(+)/cytology(+)>MRI(-)/cytology(-)
82.9977	23.51	0.875	0.531915	5.435	1	MRI(+)/cytology(+)>MRI(-)/cytology(-)
82.9977	23.58	0.875	0.531915	5.455	1	MRI(+)/cytology(+)>MRI(-)/cytology(-)
100.932	23.51	0.875	0.531915	5.09	1	MRI(+)/cytology(+)>MRI(-)/cytology(-)
102.091	17.85	0.875	0.531915	4.375	1	MRI(+)/cytology(+)<MRI(-)/cytology(-)
102.126	23.29	0.875	0.531915	4.385	1	MRI(+)/cytology(+)<MRI(-)/cytology(-)
102.127	22.77	0.875	0.531915	5.225	1	MRI(+)/cytology(+)<MRI(-)/cytology(-)
102.128	18.19	0.875	0.531915	5.905	1	MRI(+)/cytology(+)<MRI(-)/cytology(-)
102.128	21.13	0.875	0.531915	5.31	1	MRI(+)/cytology(+)<MRI(-)/cytology(-)
102.129	16.22	0.875	0.531915	5.42	1	MRI(+)/cytology(+)<MRI(-)/cytology(-)
109.943	23.48	0.875	0.531915	5.22	1	MRI(+)/cytology(+)>MRI(-)/cytology(-)
110.071	18.85	0.875	0.531915	3.81	1	MRI(+)/cytology(+)>MRI(-)/cytology(-)
111.968	23.5	0.875	0.531915	4.96	1	MRI(+)/cytology(+)>MRI(-)/cytology(-)
112.956	23.4	0.875	0.531915	5.14	1	MRI(+)/cytology(+)>MRI(-)/cytology(-)
112.956	23.47	0.875	0.531915	5.16	1	MRI(+)/cytology(+)>MRI(-)/cytology(-)
113.948	23.04	0.875	0.531915	4.595	1	MRI(+)/cytology(+)>MRI(-)/cytology(-)
115.023	1.33	0.875	0.531915	4	1	MRI(+)/cytology(+)>MRI(-)/cytology(-)
115.964	23.01	0.875	0.531915	5.56	1	MRI(+)/cytology(+)>MRI(-)/cytology(-)
126.09	8.45	0.875	0.531915	2.98	1	MRI(+)/cytology(+)>MRI(-)/cytology(-)
136.021	18.81	0.875	0.531915	4.97	1	MRI(+)/cytology(+)>MRI(-)/cytology(-)
138.98	23.04	0.875	0.531915	4.65	1	MRI(+)/cytology(+)>MRI(-)/cytology(-)
147.065	2.19	0.875	0.531915	3.31	1	MRI(+)/cytology(+)>MRI(-)/cytology(-)
152.07	8.38	0.875	0.531915	2.93	1	MRI(+)/cytology(+)>MRI(-)/cytology(-)
162.111	1.72	0.875	0.531915	4.47	1	MRI(+)/cytology(+)>MRI(-)/cytology(-)
165.114	22.73	0.875	0.531915	4.64	1	MRI(+)/cytology(+)>MRI(-)/cytology(-)
174.188	8.99	0.875	0.531915	2.6	1	MRI(+)/cytology(+)<MRI(-)/cytology(-)
193.094	8.42	0.875	0.531915	3.455	1	MRI(+)/cytology(+)>MRI(-)/cytology(-)
193.095	8.4	0.875	0.531915	3.4	1	MRI(+)/cytology(+)>MRI(-)/cytology(-)
213.114	18.72	0.875	0.531915	4.39	1	MRI(+)/cytology(+)>MRI(-)/cytology(-)
229.892	23.03	0.875	0.531915	4.78	1	MRI(+)/cytology(+)<MRI(-)/cytology(-)
230.248	22.69	0.875	0.531915	4.39	1	MRI(+)/cytology(+)>MRI(-)/cytology(-)
239.148	19.47	0.875	0.531915	5.33	1	MRI(+)/cytology(+)>MRI(-)/cytology(-)
249.117	8.52	0.875	0.531915	3.335	1	MRI(+)/cytology(+)<MRI(-)/cytology(-)
258.281	10.76	0.875	0.531915	3.935	1	MRI(+)/cytology(+)<MRI(-)/cytology(-)
258.882	23.65	0.875	0.531915	4.83	1	MRI(+)/cytology(+)>MRI(-)/cytology(-)
261.131	7.67	0.875	0.531915	3.24	1	MRI(+)/cytology(+)>MRI(-)/cytology(-)
261.132	22.53	0.875	0.531915	5.815	1	MRI(+)/cytology(+)>MRI(-)/cytology(-)
263.895	23.04	0.875	0.531915	4.59	1	MRI(+)/cytology(+)>MRI(-)/cytology(-)
279.091	11.61	0.875	0.531915	4.575	1	MRI(+)/cytology(+)>MRI(-)/cytology(-)
284.209	9.05	0.875	0.531915	3.56	1	MRI(+)/cytology(+)<MRI(-)/cytology(-)
303.308	10.48	0.875	0.531915	4.88	1	MRI(+)/cytology(+)>MRI(-)/cytology(-)
303.308	10.45	0.875	0.531915	4.87	1	MRI(+)/cytology(+)>MRI(-)/cytology(-)
305.156	22.25	0.875	0.531915	5.455	1	MRI(+)/cytology(+)>MRI(-)/cytology(-)
305.156	22.46	0.875	0.531915	4.86	1	MRI(+)/cytology(+)>MRI(-)/cytology(-)
305.157	22.68	0.875	0.531915	5.12	1	MRI(+)/cytology(+)>MRI(-)/cytology(-)
305.157	8.58	0.875	0.531915	4.09	1	MRI(+)/cytology(+)>MRI(-)/cytology(-)
306.162	9.13	0.875	0.531915	3.3	1	MRI(+)/cytology(+)>MRI(-)/cytology(-)
313.272	16.74	0.875	0.531915	5.1	1	MRI(+)/cytology(+)>MRI(-)/cytology(-)
350.185	8.32	0.875	0.531915	3.54	1	MRI(+)/cytology(+)<MRI(-)/cytology(-)
354.82	22.98	0.875	0.531915	4.39	1	MRI(+)/cytology(+)>MRI(-)/cytology(-)
372.23	8.44	0.875	0.531915	3.775	1	MRI(+)/cytology(+)<MRI(-)/cytology(-)
372.348	9.21	0.875	0.531915	1.68	1	MRI(+)/cytology(+)<MRI(-)/cytology(-)
398.231	16.14	0.875	0.531915	4.595	1	MRI(+)/cytology(+)>MRI(-)/cytology(-)
399.181	10.04	0.875	0.531915	4.505	1	MRI(+)/cytology(+)>MRI(-)/cytology(-)
408.308	17.23	0.875	0.531915	4.135	1	MRI(+)/cytology(+)>MRI(-)/cytology(-)
421.232	14.38	0.875	0.531915	5.53	1	MRI(+)/cytology(+)>MRI(-)/cytology(-)
430.914	21.92	0.875	0.531915	2.85	1	MRI(+)/cytology(+)>MRI(-)/cytology(-)
439.235	8.68	0.875	0.531915	3.485	1	MRI(+)/cytology(+)>MRI(-)/cytology(-)
460.852	23	0.875	0.531915	4.065	1	MRI(+)/cytology(+)<MRI(-)/cytology(-)
463.233	10.28	0.875	0.531915	2.76	1	MRI(+)/cytology(+)>MRI(-)/cytology(-)
481.263	9.88	0.875	0.531915	4.66	1	MRI(+)/cytology(+)<MRI(-)/cytology(-)
514.768	23.01	0.875	0.531915	4.17	1	MRI(+)/cytology(+)>MRI(-)/cytology(-)
533.454	22.26	0.875	0.531915	4.34	1	MRI(+)/cytology(+)>MRI(-)/cytology(-)
567.373	8.54	0.875	0.531915	2.965	0	MRI(+)/cytology(+)<MRI(-)/cytology(-)
572.319	8.56	0.875	0.531915	3.74	0	MRI(+)/cytology(+)<MRI(-)/cytology(-)
591.355	9.27	0.875	0.531915	3.19	1	MRI(+)/cytology(+)<MRI(-)/cytology(-)
608.385	9.43	0.875	0.531915	4	1	MRI(+)/cytology(+)<MRI(-)/cytology(-)
614.338	8.62	0.875	0.531915	4.99	1	MRI(+)/cytology(+)<MRI(-)/cytology(-)
615.339	8.52	0.875	0.531915	4.67	1	MRI(+)/cytology(+)<MRI(-)/cytology(-)
628.196	18.66	0.875	0.531915	4.62	1	MRI(+)/cytology(+)>MRI(-)/cytology(-)
629.195	18.68	0.875	0.531915	4.35	1	MRI(+)/cytology(+)>MRI(-)/cytology(-)
638.423	8.61	0.875	0.531915	3.55	0	MRI(+)/cytology(+)<MRI(-)/cytology(-)
654.416	8.64	0.875	0.531915	4.23	1	MRI(+)/cytology(+)<MRI(-)/cytology(-)
685.437	17.97	0.875	0.531915	4.89	1	MRI(+)/cytology(+)>MRI(-)/cytology(-)
724.477	8.73	0.875	0.531915	4.225	1	MRI(+)/cytology(+)<MRI(-)/cytology(-)
771.851	1.61	0.875	0.531915	5.33	1	MRI(+)/cytology(+)<MRI(-)/cytology(-)
838.841	22.05	0.875	0.531915	2.38	1	MRI(+)/cytology(+)>MRI(-)/cytology(-)
982.807	1.62	0.875	0.531915	4.87	1	MRI(+)/cytology(+)<MRI(-)/cytology(-)
1025.47	1.63	0.875	0.531915	4.52	1	MRI(+)/cytology(+)<MRI(-)/cytology(-)
1084.79	1.63	0.875	0.531915	4.86	1	MRI(+)/cytology(+)<MRI(-)/cytology(-)
1144.78	1.67	0.875	0.531915	5.315	1	MRI(+)/cytology(+)>MRI(-)/cytology(-)
1185.27	7.97	0.875	0.531915	1.075	0	MRI(+)/cytology(+)>MRI(-)/cytology(-)
56.0519	20.49	1	0.404255	3.96	1	MRI(+)/cytology(+)>MRI(-)/cytology(-)
60.0479	16.73	1	0.404255	4.64	1	MRI(+)/cytology(+)>MRI(-)/cytology(-)
73.9459	23.7	1	0.404255	4.49	1	MRI(+)/cytology(+)>MRI(-)/cytology(-)
82.0541	21.4	1	0.404255	3.51	1	MRI(+)/cytology(+)>MRI(-)/cytology(-)
97.9313	23.78	1	0.404255	4.64	1	MRI(+)/cytology(+)>MRI(-)/cytology(-)
97.9685	23.82	1	0.404255	4.87	1	MRI(+)/cytology(+)>MRI(-)/cytology(-)
97.9695	23.43	1	0.404255	5.505	1	MRI(+)/cytology(+)>MRI(-)/cytology(-)
102.126	18.39	1	0.404255	4.82	1	MRI(+)/cytology(+)<MRI(-)/cytology(-)
102.127	8.84	1	0.404255	5.19	1	MRI(+)/cytology(+)<MRI(-)/cytology(-)
102.129	18.39	1	0.404255	5.675	1	MRI(+)/cytology(+)<MRI(-)/cytology(-)
102.129	8.88	1	0.404255	5.26	1	MRI(+)/cytology(+)<MRI(-)/cytology(-)
102.129	23.83	1	0.404255	5.135	1	MRI(+)/cytology(+)<MRI(-)/cytology(-)
107.087	2.29	1	0.404255	4.795	1	MRI(+)/cytology(+)>MRI(-)/cytology(-)
114.091	8.1	1	0.404255	4.12	1	MRI(+)/cytology(+)>MRI(-)/cytology(-)
134.955	23.48	1	0.404255	4.56	1	MRI(+)/cytology(+)>MRI(-)/cytology(-)
136.022	17.96	1	0.404255	4.22	1	MRI(+)/cytology(+)>MRI(-)/cytology(-)
141.958	23.19	1	0.404255	4.685	1	MRI(+)/cytology(+)>MRI(-)/cytology(-)
145.953	23.07	1	0.404255	4.9	1	MRI(+)/cytology(+)<MRI(-)/cytology(-)
158.889	22.97	1	0.404255	4.17	1	MRI(+)/cytology(+)>MRI(-)/cytology(-)
165.113	22.78	1	0.404255	4.82	1	MRI(+)/cytology(+)>MRI(-)/cytology(-)
217.104	8.59	1	0.404255	4.39	1	MRI(+)/cytology(+)>MRI(-)/cytology(-)
230.889	23.05	1	0.404255	4.66	1	MRI(+)/cytology(+)>MRI(-)/cytology(-)
230.889	23.18	1	0.404255	5.15	1	MRI(+)/cytology(+)>MRI(-)/cytology(-)
239.147	8.43	1	0.404255	3.845	1	MRI(+)/cytology(+)>MRI(-)/cytology(-)
289.163	8.96	1	0.404255	3.7	1	MRI(+)/cytology(+)<MRI(-)/cytology(-)
296.181	8.43	1	0.404255	2.59	0	MRI(+)/cytology(+)>MRI(-)/cytology(-)
305.159	16.41	1	0.404255	5.225	1	MRI(+)/cytology(+)>MRI(-)/cytology(-)
316.88	22.91	1	0.404255	4.48	1	MRI(+)/cytology(+)>MRI(-)/cytology(-)
322.156	7.72	1	0.404255	2.335	1	MRI(+)/cytology(+)>MRI(-)/cytology(-)
323.861	23	1	0.404255	4.26	1	MRI(+)/cytology(+)<MRI(-)/cytology(-)
344.874	22.97	1	0.404255	5.72	1	MRI(+)/cytology(+)<MRI(-)/cytology(-)
376.26	12.87	1	0.404255	3.19	1	MRI(+)/cytology(+)>MRI(-)/cytology(-)
395.216	8.68	1	0.404255	3.61	1	MRI(+)/cytology(+)>MRI(-)/cytology(-)
399.252	14.66	1	0.404255	4.44	1	MRI(+)/cytology(+)<MRI(-)/cytology(-)
403.236	15.74	1	0.404255	4.045	1	MRI(+)/cytology(+)>MRI(-)/cytology(-)
417.254	8.37	1	0.404255	3.255	1	MRI(+)/cytology(+)<MRI(-)/cytology(-)
426.219	15.53	1	0.404255	4.77	1	MRI(+)/cytology(+)>MRI(-)/cytology(-)
433.276	7.88	1	0.404255	2.17	1	MRI(+)/cytology(+)>MRI(-)/cytology(-)
437.192	19.75	1	0.404255	4.755	1	MRI(+)/cytology(+)<MRI(-)/cytology(-)
467.099	1.57	1	0.404255	4.89	1	MRI(+)/cytology(+)<MRI(-)/cytology(-)
476.904	1.46	1	0.404255	4.9	1	MRI(+)/cytology(+)<MRI(-)/cytology(-)
477.826	22.98	1	0.404255	3.86	1	MRI(+)/cytology(+)<MRI(-)/cytology(-)
494.805	22.98	1	0.404255	4.755	1	MRI(+)/cytology(+)<MRI(-)/cytology(-)
520.331	9.36	1	0.404255	4.8	1	MRI(+)/cytology(+)<MRI(-)/cytology(-)
557.132	7.93	1	0.404255	2	0	MRI(+)/cytology(+)<MRI(-)/cytology(-)
652.404	9.3	1	0.404255	3.335	1	MRI(+)/cytology(+)<MRI(-)/cytology(-)
669.783	22.96	1	0.404255	4.03	1	MRI(+)/cytology(+)>MRI(-)/cytology(-)
685.438	18.18	1	0.404255	4.85	1	MRI(+)/cytology(+)<MRI(-)/cytology(-)
771.851	1.65	1	0.404255	5.44	1	MRI(+)/cytology(+)>MRI(-)/cytology(-)
854.732	21.84	1	0.404255	2.78	1	MRI(+)/cytology(+)>MRI(-)/cytology(-)
997.477	1.6	1	0.404255	4.8	1	MRI(+)/cytology(+)>MRI(-)/cytology(-)
1111.28	1.71	1	0.404255	4.91	1	MRI(+)/cytology(+)>MRI(-)/cytology(-)
1111.79	1.61	1	0.404255	4.95	1	MRI(+)/cytology(+)>MRI(-)/cytology(-)
59.0509	10.17	0.5	0.893617	5.58	1	MRI(+)/cytology(+)>MRI(-)/cytology(-)
59.0512	23.91	0.5	0.893617	5.485	1	MRI(+)/cytology(+)>MRI(-)/cytology(-)
59.0513	9.91	0.5	0.893617	5.44	1	MRI(+)/cytology(+)>MRI(-)/cytology(-)
59.0515	8.43	0.5	0.893617	5.24	1	MRI(+)/cytology(+)>MRI(-)/cytology(-)
59.052	10.03	0.5	0.893617	5.605	1	MRI(+)/cytology(+)>MRI(-)/cytology(-)
102.127	16.11	0.5	0.893617	5.27	1	MRI(+)/cytology(+)<MRI(-)/cytology(-)
102.129	7.71	0.5	0.893617	4.57	1	MRI(+)/cytology(+)<MRI(-)/cytology(-)
121.082	7.87	0.5	0.893617	4.41	1	MRI(+)/cytology(+)>MRI(-)/cytology(-)
124.087	20.78	0.5	0.893617	5.395	1	MRI(+)/cytology(+)<MRI(-)/cytology(-)
155.089	7.91	0.5	0.893617	3.255	1	MRI(+)/cytology(+)>MRI(-)/cytology(-)
163.116	1.79	0.5	0.893617	3.82	1	MRI(+)/cytology(+)>MRI(-)/cytology(-)
171.113	8.2	0.5	0.893617	3.08	1	MRI(+)/cytology(+)<MRI(-)/cytology(-)
219.017	3.84	0.5	0.893617	5.025	1	MRI(+)/cytology(+)>MRI(-)/cytology(-)
235.18	8.27	0.5	0.893617	3.45	1	MRI(+)/cytology(+)<MRI(-)/cytology(-)
238.079	9.1	0.5	0.893617	2.54	1	MRI(+)/cytology(+)>MRI(-)/cytology(-)
272.958	22.94	0.5	0.893617	4.425	1	MRI(+)/cytology(+)>MRI(-)/cytology(-)
296.256	9.66	0.5	0.893617	4.305	1	MRI(+)/cytology(+)>MRI(-)/cytology(-)
318.195	8.55	0.5	0.893617	4.38	1	MRI(+)/cytology(+)>MRI(-)/cytology(-)
340.178	8.52	0.5	0.893617	4.76	1	MRI(+)/cytology(+)>MRI(-)/cytology(-)
430.913	19.87	0.5	0.893617	4.77	1	MRI(+)/cytology(+)>MRI(-)/cytology(-)
447.309	12.3	0.5	0.893617	3.255	1	MRI(+)/cytology(+)<MRI(-)/cytology(-)
478.309	8.82	0.5	0.893617	2.91	1	MRI(+)/cytology(+)<MRI(-)/cytology(-)
496.341	14.1	0.5	0.893617	3.53	1	MRI(+)/cytology(+)<MRI(-)/cytology(-)
497.341	14.03	0.5	0.893617	3.25	1	MRI(+)/cytology(+)<MRI(-)/cytology(-)
497.343	14	0.5	0.893617	3.3	1	MRI(+)/cytology(+)<MRI(-)/cytology(-)
527.293	8.66	0.5	0.893617	3.435	1	MRI(+)/cytology(+)<MRI(-)/cytology(-)
536.327	8.2	0.5	0.893617	5.25	1	MRI(+)/cytology(+)>MRI(-)/cytology(-)
547.333	8.46	0.5	0.893617	5.95	0	MRI(+)/cytology(+)>MRI(-)/cytology(-)
565.361	8.47	0.5	0.893617	5.78	1	MRI(+)/cytology(+)>MRI(-)/cytology(-)
591.358	8.47	0.5	0.893617	5.675	1	MRI(+)/cytology(+)>MRI(-)/cytology(-)
652.406	8.48	0.5	0.893617	5.385	1	MRI(+)/cytology(+)>MRI(-)/cytology(-)
779.866	8.24	0.5	0.893617	3.67	1	MRI(+)/cytology(+)>MRI(-)/cytology(-)
797.335	7.98	0.5	0.893617	3.045	0	MRI(+)/cytology(+)>MRI(-)/cytology(-)
853.722	22.17	0.5	0.893617	4.09	1	MRI(+)/cytology(+)>MRI(-)/cytology(-)
853.731	22.63	0.5	0.893617	5.05	1	MRI(+)/cytology(+)>MRI(-)/cytology(-)
854.733	22.63	0.5	0.893617	4.905	1	MRI(+)/cytology(+)>MRI(-)/cytology(-)
59.0515	18.3	0.625	0.765957	5.535	1	MRI(+)/cytology(+)>MRI(-)/cytology(-)
59.052	8.59	0.625	0.765957	4.6	1	MRI(+)/cytology(+)>MRI(-)/cytology(-)
82.0539	18.94	0.625	0.765957	3.8	1	MRI(+)/cytology(+)<MRI(-)/cytology(-)
87.9244	24.1	0.625	0.765957	4.98	1	MRI(+)/cytology(+)>MRI(-)/cytology(-)
97.029	2.08	0.625	0.765957	4.835	1	MRI(+)/cytology(+)>MRI(-)/cytology(-)
98.0957	8	0.625	0.765957	2.56	1	MRI(+)/cytology(+)>MRI(-)/cytology(-)
103.131	22.04	0.625	0.765957	4.555	1	MRI(+)/cytology(+)<MRI(-)/cytology(-)
105.034	7.91	0.625	0.765957	3.42	1	MRI(+)/cytology(+)>MRI(-)/cytology(-)
114.066	1.73	0.625	0.765957	4.99	1	MRI(+)/cytology(+)>MRI(-)/cytology(-)
165.112	19.47	0.625	0.765957	5.055	1	MRI(+)/cytology(+)>MRI(-)/cytology(-)
166.087	7.37	0.625	0.765957	3.13	1	MRI(+)/cytology(+)>MRI(-)/cytology(-)
166.096	20.03	0.625	0.765957	4.89	1	MRI(+)/cytology(+)>MRI(-)/cytology(-)
171.112	8	0.625	0.765957	3.87	1	MRI(+)/cytology(+)>MRI(-)/cytology(-)
173.078	22.06	0.625	0.765957	5.06	1	MRI(+)/cytology(+)>MRI(-)/cytology(-)
193.095	9.01	0.625	0.765957	3.45	1	MRI(+)/cytology(+)>MRI(-)/cytology(-)
193.095	7.99	0.625	0.765957	3.88	1	MRI(+)/cytology(+)>MRI(-)/cytology(-)
202.217	8.9	0.625	0.765957	5.04	1	MRI(+)/cytology(+)>MRI(-)/cytology(-)
203.221	9.15	0.625	0.765957	3.07	1	MRI(+)/cytology(+)<MRI(-)/cytology(-)
213.145	11.23	0.625	0.765957	4.17	1	MRI(+)/cytology(+)<MRI(-)/cytology(-)
213.146	11.19	0.625	0.765957	4.72	1	MRI(+)/cytology(+)<MRI(-)/cytology(-)
217.105	16.63	0.625	0.765957	5.48	1	MRI(+)/cytology(+)>MRI(-)/cytology(-)
219.211	9.28	0.625	0.765957	2.62	1	MRI(+)/cytology(+)<MRI(-)/cytology(-)
232.255	9.74	0.625	0.765957	4.19	0	MRI(+)/cytology(+)>MRI(-)/cytology(-)
239.148	18.88	0.625	0.765957	5.135	1	MRI(+)/cytology(+)>MRI(-)/cytology(-)
246.243	8.93	0.625	0.765957	5.265	1	MRI(+)/cytology(+)>MRI(-)/cytology(-)
261.13	21.28	0.625	0.765957	4.825	1	MRI(+)/cytology(+)<MRI(-)/cytology(-)
261.133	17.32	0.625	0.765957	5.55	1	MRI(+)/cytology(+)>MRI(-)/cytology(-)
262.142	14.44	0.625	0.765957	4.525	1	MRI(+)/cytology(+)<MRI(-)/cytology(-)
272.883	22.96	0.625	0.765957	4.39	1	MRI(+)/cytology(+)>MRI(-)/cytology(-)
283.176	17.48	0.625	0.765957	5.17	1	MRI(+)/cytology(+)>MRI(-)/cytology(-)
283.176	18.74	0.625	0.765957	5.16	1	MRI(+)/cytology(+)>MRI(-)/cytology(-)
295.227	12.51	0.625	0.765957	4.15	1	MRI(+)/cytology(+)>MRI(-)/cytology(-)
307.113	9.13	0.625	0.765957	3.305	1	MRI(+)/cytology(+)>MRI(-)/cytology(-)
327.047	1.61	0.625	0.765957	4.23	1	MRI(+)/cytology(+)>MRI(-)/cytology(-)
329.23	12.7	0.625	0.765957	4.42	1	MRI(+)/cytology(+)<MRI(-)/cytology(-)
338.342	19.59	0.625	0.765957	4.89	1	MRI(+)/cytology(+)>MRI(-)/cytology(-)
338.343	19.99	0.625	0.765957	5.34	1	MRI(+)/cytology(+)>MRI(-)/cytology(-)
347.168	8.46	0.625	0.765957	3.485	1	MRI(+)/cytology(+)<MRI(-)/cytology(-)
349.185	21.36	0.625	0.765957	4.5	1	MRI(+)/cytology(+)<MRI(-)/cytology(-)
364.845	23.03	0.625	0.765957	4.33	1	MRI(+)/cytology(+)<MRI(-)/cytology(-)
372.233	8.59	0.625	0.765957	3.405	1	MRI(+)/cytology(+)<MRI(-)/cytology(-)
399.178	10.02	0.625	0.765957	4.42	1	MRI(+)/cytology(+)>MRI(-)/cytology(-)
416.285	8.5	0.625	0.765957	4.47	1	MRI(+)/cytology(+)<MRI(-)/cytology(-)
430.915	18.96	0.625	0.765957	2.63	1	MRI(+)/cytology(+)<MRI(-)/cytology(-)
496.338	13.72	0.625	0.765957	3.72	1	MRI(+)/cytology(+)<MRI(-)/cytology(-)
529.09	9.63	0.625	0.765957	1.22	0	MRI(+)/cytology(+)<MRI(-)/cytology(-)
635.148	18.64	0.625	0.765957	4.365	0	MRI(+)/cytology(+)>MRI(-)/cytology(-)
685.429	19.39	0.625	0.765957	4.255	1	MRI(+)/cytology(+)>MRI(-)/cytology(-)
838.837	20.31	0.625	0.765957	1.88	1	MRI(+)/cytology(+)<MRI(-)/cytology(-)
853.727	17.9	0.625	0.765957	4.41	1	MRI(+)/cytology(+)>MRI(-)/cytology(-)
854.727	17.9	0.625	0.765957	3.795	1	MRI(+)/cytology(+)>MRI(-)/cytology(-)
974.811	22.68	0.625	0.765957	4.63	1	MRI(+)/cytology(+)>MRI(-)/cytology(-)
59.0516	21.67	0.75	0.638298	5.36	1	MRI(+)/cytology(+)>MRI(-)/cytology(-)
67.024	22.9	0.75	0.638298	4.465	1	MRI(+)/cytology(+)>MRI(-)/cytology(-)
68.9949	23.68	0.75	0.638298	5.17	1	MRI(+)/cytology(+)>MRI(-)/cytology(-)
68.9951	23.7	0.75	0.638298	5.27	1	MRI(+)/cytology(+)>MRI(-)/cytology(-)
91.0545	22.03	0.75	0.638298	4.44	1	MRI(+)/cytology(+)<MRI(-)/cytology(-)
99.9478	23.44	0.75	0.638298	5.03	1	MRI(+)/cytology(+)>MRI(-)/cytology(-)
102.127	3.4	0.75	0.638298	4.555	1	MRI(+)/cytology(+)<MRI(-)/cytology(-)
102.127	0.06	0.75	0.638298	4.9	1	MRI(+)/cytology(+)<MRI(-)/cytology(-)
102.127	0.11	0.75	0.638298	4.94	1	MRI(+)/cytology(+)<MRI(-)/cytology(-)
102.128	16.79	0.75	0.638298	5.6	1	MRI(+)/cytology(+)<MRI(-)/cytology(-)
102.129	17.78	0.75	0.638298	5.69	1	MRI(+)/cytology(+)<MRI(-)/cytology(-)
102.129	6.71	0.75	0.638298	4.525	1	MRI(+)/cytology(+)<MRI(-)/cytology(-)
102.129	23.24	0.75	0.638298	5.265	1	MRI(+)/cytology(+)<MRI(-)/cytology(-)
102.129	27.7	0.75	0.638298	4.48	1	MRI(+)/cytology(+)<MRI(-)/cytology(-)
123.079	17.06	0.75	0.638298	4.23	1	MRI(+)/cytology(+)<MRI(-)/cytology(-)
124.087	19.51	0.75	0.638298	5.74	1	MRI(+)/cytology(+)<MRI(-)/cytology(-)
124.087	14.88	0.75	0.638298	4.73	1	MRI(+)/cytology(+)<MRI(-)/cytology(-)
126.09	7.91	0.75	0.638298	3.42	1	MRI(+)/cytology(+)>MRI(-)/cytology(-)
138.091	20.04	0.75	0.638298	4.33	1	MRI(+)/cytology(+)>MRI(-)/cytology(-)
140.951	23.64	0.75	0.638298	5.26	1	MRI(+)/cytology(+)>MRI(-)/cytology(-)
149.058	7.83	0.75	0.638298	3.85	1	MRI(+)/cytology(+)>MRI(-)/cytology(-)
166.086	8.33	0.75	0.638298	3.57	1	MRI(+)/cytology(+)>MRI(-)/cytology(-)
173.079	19.41	0.75	0.638298	4.94	1	MRI(+)/cytology(+)>MRI(-)/cytology(-)
186.22	10.52	0.75	0.638298	3.3	1	MRI(+)/cytology(+)<MRI(-)/cytology(-)
191.077	1.48	0.75	0.638298	4.17	1	MRI(+)/cytology(+)>MRI(-)/cytology(-)
194.095	8.45	0.75	0.638298	3.29	1	MRI(+)/cytology(+)>MRI(-)/cytology(-)
214.254	19.03	0.75	0.638298	3.68	1	MRI(+)/cytology(+)>MRI(-)/cytology(-)
217.104	22.04	0.75	0.638298	5.64	1	MRI(+)/cytology(+)>MRI(-)/cytology(-)
217.105	21.91	0.75	0.638298	5.68	1	MRI(+)/cytology(+)>MRI(-)/cytology(-)
217.105	22.06	0.75	0.638298	5.755	1	MRI(+)/cytology(+)>MRI(-)/cytology(-)
226.953	18.39	0.75	0.638298	3.4	1	MRI(+)/cytology(+)<MRI(-)/cytology(-)
228.195	11.56	0.75	0.638298	4.95	1	MRI(+)/cytology(+)>MRI(-)/cytology(-)
230.248	9.64	0.75	0.638298	3.88	1	MRI(+)/cytology(+)>MRI(-)/cytology(-)
230.248	9.8	0.75	0.638298	5.24	1	MRI(+)/cytology(+)<MRI(-)/cytology(-)
235.181	7.88	0.75	0.638298	3.645	1	MRI(+)/cytology(+)>MRI(-)/cytology(-)
239.148	20.03	0.75	0.638298	5.29	1	MRI(+)/cytology(+)>MRI(-)/cytology(-)
241.178	11.19	0.75	0.638298	3.55	1	MRI(+)/cytology(+)<MRI(-)/cytology(-)
241.179	11.44	0.75	0.638298	3.55	1	MRI(+)/cytology(+)<MRI(-)/cytology(-)
251.126	19.27	0.75	0.638298	4.605	1	MRI(+)/cytology(+)>MRI(-)/cytology(-)
261.131	17.25	0.75	0.638298	5.55	1	MRI(+)/cytology(+)>MRI(-)/cytology(-)
262.135	9.06	0.75	0.638298	3.41	1	MRI(+)/cytology(+)>MRI(-)/cytology(-)
262.143	12.18	0.75	0.638298	4.44	1	MRI(+)/cytology(+)<MRI(-)/cytology(-)
262.235	9.38	0.75	0.638298	2.96	1	MRI(+)/cytology(+)<MRI(-)/cytology(-)
269.249	14.69	0.75	0.638298	4.99	1	MRI(+)/cytology(+)>MRI(-)/cytology(-)
305.156	22.62	0.75	0.638298	5.42	1	MRI(+)/cytology(+)>MRI(-)/cytology(-)
305.156	19.52	0.75	0.638298	5.23	1	MRI(+)/cytology(+)<MRI(-)/cytology(-)
306.161	19.39	0.75	0.638298	4.71	1	MRI(+)/cytology(+)>MRI(-)/cytology(-)
318.305	9.91	0.75	0.638298	3.18	1	MRI(+)/cytology(+)<MRI(-)/cytology(-)
329.156	15.52	0.75	0.638298	4.66	1	MRI(+)/cytology(+)>MRI(-)/cytology(-)
340.181	9.09	0.75	0.638298	3.43	1	MRI(+)/cytology(+)>MRI(-)/cytology(-)
351.193	7.93	0.75	0.638298	2.84	1	MRI(+)/cytology(+)>MRI(-)/cytology(-)
353.231	12.2	0.75	0.638298	4.72	1	MRI(+)/cytology(+)<MRI(-)/cytology(-)
360.22	8.47	0.75	0.638298	3.71	1	MRI(+)/cytology(+)>MRI(-)/cytology(-)
362.925	22.05	0.75	0.638298	2.655	0	MRI(+)/cytology(+)>MRI(-)/cytology(-)
398.234	16.38	0.75	0.638298	3.94	1	MRI(+)/cytology(+)>MRI(-)/cytology(-)
401.218	12.58	0.75	0.638298	3.71	1	MRI(+)/cytology(+)>MRI(-)/cytology(-)
413.265	19.51	0.75	0.638298	4.54	1	MRI(+)/cytology(+)<MRI(-)/cytology(-)
413.265	19.6	0.75	0.638298	4.58	1	MRI(+)/cytology(+)<MRI(-)/cytology(-)
437.236	8.99	0.75	0.638298	4.58	1	MRI(+)/cytology(+)<MRI(-)/cytology(-)
460.307	8.44	0.75	0.638298	4.14	1	MRI(+)/cytology(+)<MRI(-)/cytology(-)
479.245	8.47	0.75	0.638298	3.995	1	MRI(+)/cytology(+)<MRI(-)/cytology(-)
483.263	8.94	0.75	0.638298	3.425	1	MRI(+)/cytology(+)>MRI(-)/cytology(-)
498.901	19.53	0.75	0.638298	1.26	0	MRI(+)/cytology(+)<MRI(-)/cytology(-)
502.294	13.31	0.75	0.638298	3.97	1	MRI(+)/cytology(+)<MRI(-)/cytology(-)
502.294	13.33	0.75	0.638298	3.985	1	MRI(+)/cytology(+)<MRI(-)/cytology(-)
504.305	9.01	0.75	0.638298	4.12	1	MRI(+)/cytology(+)<MRI(-)/cytology(-)
505.337	9.03	0.75	0.638298	3.455	1	MRI(+)/cytology(+)<MRI(-)/cytology(-)
523.338	8.53	0.75	0.638298	2.525	0	MRI(+)/cytology(+)<MRI(-)/cytology(-)
548.331	9.11	0.75	0.638298	3.945	1	MRI(+)/cytology(+)<MRI(-)/cytology(-)
548.366	8.95	0.75	0.638298	4.12	1	MRI(+)/cytology(+)<MRI(-)/cytology(-)
564.357	9.23	0.75	0.638298	4.5	1	MRI(+)/cytology(+)<MRI(-)/cytology(-)
566.365	9.08	0.75	0.638298	2.56	1	MRI(+)/cytology(+)>MRI(-)/cytology(-)
570.319	8.58	0.75	0.638298	4.895	1	MRI(+)/cytology(+)<MRI(-)/cytology(-)
580.357	9.88	0.75	0.638298	2.375	1	MRI(+)/cytology(+)<MRI(-)/cytology(-)
658.368	9.07	0.75	0.638298	2.67	1	MRI(+)/cytology(+)<MRI(-)/cytology(-)
685.439	17.92	0.75	0.638298	4.51	1	MRI(+)/cytology(+)>MRI(-)/cytology(-)
696.436	8.74	0.75	0.638298	4.76	1	MRI(+)/cytology(+)<MRI(-)/cytology(-)
838.844	21.5	0.75	0.638298	2.125	0	MRI(+)/cytology(+)>MRI(-)/cytology(-)
1110.8	1.57	0.75	0.638298	5.295	1	MRI(+)/cytology(+)<MRI(-)/cytology(-)
53.0056	0.08	0.875	0.510638	4.94	1	MRI(+)/cytology(+)>MRI(-)/cytology(-)
53.006	0.16	0.875	0.510638	5.25	1	MRI(+)/cytology(+)>MRI(-)/cytology(-)
55.9362	23.72	0.875	0.510638	4.52	1	MRI(+)/cytology(+)>MRI(-)/cytology(-)
55.9368	23.5	0.875	0.510638	5.33	1	MRI(+)/cytology(+)>MRI(-)/cytology(-)
56.0527	17.19	0.875	0.510638	3.57	1	MRI(+)/cytology(+)<MRI(-)/cytology(-)
68.9949	23.65	0.875	0.510638	5.335	1	MRI(+)/cytology(+)>MRI(-)/cytology(-)
68.9951	23.57	0.875	0.510638	5.705	1	MRI(+)/cytology(+)>MRI(-)/cytology(-)
68.996	23.74	0.875	0.510638	5.285	1	MRI(+)/cytology(+)>MRI(-)/cytology(-)
68.9961	23.85	0.875	0.510638	5.23	1	MRI(+)/cytology(+)>MRI(-)/cytology(-)
71.9514	23.07	0.875	0.510638	5.5	1	MRI(+)/cytology(+)>MRI(-)/cytology(-)
72.9383	23.73	0.875	0.510638	5.28	1	MRI(+)/cytology(+)>MRI(-)/cytology(-)
73.946	23.42	0.875	0.510638	5.09	1	MRI(+)/cytology(+)>MRI(-)/cytology(-)
81.9384	23.57	0.875	0.510638	6.23	1	MRI(+)/cytology(+)>MRI(-)/cytology(-)
82.9975	23.65	0.875	0.510638	4.81	1	MRI(+)/cytology(+)>MRI(-)/cytology(-)
82.9976	23.72	0.875	0.510638	4.875	1	MRI(+)/cytology(+)>MRI(-)/cytology(-)
84.9605	1.33	0.875	0.510638	5.16	1	MRI(+)/cytology(+)>MRI(-)/cytology(-)
84.9609	22.91	0.875	0.510638	6.065	1	MRI(+)/cytology(+)>MRI(-)/cytology(-)
85.0421	17.51	0.875	0.510638	2.97	1	MRI(+)/cytology(+)>MRI(-)/cytology(-)
87.9258	23.73	0.875	0.510638	5.12	1	MRI(+)/cytology(+)>MRI(-)/cytology(-)
91.0562	17.49	0.875	0.510638	3.3	1	MRI(+)/cytology(+)>MRI(-)/cytology(-)
97.9685	23.73	0.875	0.510638	5.07	1	MRI(+)/cytology(+)>MRI(-)/cytology(-)
100.955	23.1	0.875	0.510638	5.29	1	MRI(+)/cytology(+)>MRI(-)/cytology(-)
102.128	17.13	0.875	0.510638	5.69	1	MRI(+)/cytology(+)<MRI(-)/cytology(-)
102.128	17.94	0.875	0.510638	5.37	1	MRI(+)/cytology(+)<MRI(-)/cytology(-)
102.128	19.99	0.875	0.510638	5.87	1	MRI(+)/cytology(+)<MRI(-)/cytology(-)
102.128	20.92	0.875	0.510638	5.49	1	MRI(+)/cytology(+)<MRI(-)/cytology(-)
103.13	18.6	0.875	0.510638	4.72	1	MRI(+)/cytology(+)<MRI(-)/cytology(-)
103.131	20.05	0.875	0.510638	4.74	1	MRI(+)/cytology(+)<MRI(-)/cytology(-)
103.131	19.48	0.875	0.510638	4.765	1	MRI(+)/cytology(+)<MRI(-)/cytology(-)
107.086	2.31	0.875	0.510638	4.69	1	MRI(+)/cytology(+)>MRI(-)/cytology(-)
112.955	23.52	0.875	0.510638	5.35	1	MRI(+)/cytology(+)>MRI(-)/cytology(-)
116.971	22.99	0.875	0.510638	4.755	1	MRI(+)/cytology(+)>MRI(-)/cytology(-)
122.096	22.68	0.875	0.510638	4.66	1	MRI(+)/cytology(+)>MRI(-)/cytology(-)
124.086	8.11	0.875	0.510638	3.6	1	MRI(+)/cytology(+)>MRI(-)/cytology(-)
124.088	8.26	0.875	0.510638	3.73	1	MRI(+)/cytology(+)>MRI(-)/cytology(-)
130.158	7.56	0.875	0.510638	2.81	1	MRI(+)/cytology(+)<MRI(-)/cytology(-)
130.158	7.65	0.875	0.510638	2.78	1	MRI(+)/cytology(+)<MRI(-)/cytology(-)
136.022	19.38	0.875	0.510638	4.91	1	MRI(+)/cytology(+)>MRI(-)/cytology(-)
141.957	23.09	0.875	0.510638	4.165	1	MRI(+)/cytology(+)>MRI(-)/cytology(-)
141.983	22.99	0.875	0.510638	4.67	1	MRI(+)/cytology(+)>MRI(-)/cytology(-)
158.964	22.24	0.875	0.510638	3.55	0	MRI(+)/cytology(+)>MRI(-)/cytology(-)
173.077	8.7	0.875	0.510638	3.82	1	MRI(+)/cytology(+)<MRI(-)/cytology(-)
173.077	22.71	0.875	0.510638	5.055	1	MRI(+)/cytology(+)>MRI(-)/cytology(-)
173.078	22.47	0.875	0.510638	4.965	1	MRI(+)/cytology(+)>MRI(-)/cytology(-)
174.185	8.23	0.875	0.510638	1.805	0	MRI(+)/cytology(+)>MRI(-)/cytology(-)
190.586	8	0.875	0.510638	1.04	0	MRI(+)/cytology(+)>MRI(-)/cytology(-)
197.128	8.45	0.875	0.510638	3.405	1	MRI(+)/cytology(+)<MRI(-)/cytology(-)
217.104	18.73	0.875	0.510638	5.23	1	MRI(+)/cytology(+)>MRI(-)/cytology(-)
217.105	18.29	0.875	0.510638	5.335	1	MRI(+)/cytology(+)<MRI(-)/cytology(-)
228.195	11.89	0.875	0.510638	3.82	1	MRI(+)/cytology(+)<MRI(-)/cytology(-)
234.886	23.03	0.875	0.510638	5.24	1	MRI(+)/cytology(+)>MRI(-)/cytology(-)
240.18	7.83	0.875	0.510638	3.345	1	MRI(+)/cytology(+)>MRI(-)/cytology(-)
246.243	9.46	0.875	0.510638	4.17	1	MRI(+)/cytology(+)<MRI(-)/cytology(-)
249.119	8.48	0.875	0.510638	3.515	1	MRI(+)/cytology(+)<MRI(-)/cytology(-)
259.281	10.48	0.875	0.510638	4.36	1	MRI(+)/cytology(+)<MRI(-)/cytology(-)
261.129	22.25	0.875	0.510638	5.32	1	MRI(+)/cytology(+)>MRI(-)/cytology(-)
277.124	8.8	0.875	0.510638	3.88	1	MRI(+)/cytology(+)>MRI(-)/cytology(-)
277.127	8.61	0.875	0.510638	4.12	1	MRI(+)/cytology(+)>MRI(-)/cytology(-)
279.091	11.6	0.875	0.510638	4.58	1	MRI(+)/cytology(+)>MRI(-)/cytology(-)
315.252	17.35	0.875	0.510638	4.665	1	MRI(+)/cytology(+)>MRI(-)/cytology(-)
329.234	8.01	0.875	0.510638	3.01	1	MRI(+)/cytology(+)>MRI(-)/cytology(-)
331.285	16.75	0.875	0.510638	4.73	1	MRI(+)/cytology(+)>MRI(-)/cytology(-)
333.275	16.3	0.875	0.510638	5.17	1	MRI(+)/cytology(+)>MRI(-)/cytology(-)
338.266	12.27	0.875	0.510638	4.155	1	MRI(+)/cytology(+)>MRI(-)/cytology(-)
340.932	1.47	0.875	0.510638	4.41	1	MRI(+)/cytology(+)>MRI(-)/cytology(-)
349.182	22.05	0.875	0.510638	4.315	1	MRI(+)/cytology(+)>MRI(-)/cytology(-)
351.198	8	0.875	0.510638	2.81	1	MRI(+)/cytology(+)>MRI(-)/cytology(-)
358.368	11.64	0.875	0.510638	4.965	1	MRI(+)/cytology(+)<MRI(-)/cytology(-)
366.182	8.91	0.875	0.510638	3.7	1	MRI(+)/cytology(+)>MRI(-)/cytology(-)
371.164	22.12	0.875	0.510638	4.25	1	MRI(+)/cytology(+)>MRI(-)/cytology(-)
393.212	19.6	0.875	0.510638	4.775	1	MRI(+)/cytology(+)<MRI(-)/cytology(-)
393.212	18.34	0.875	0.510638	4.71	1	MRI(+)/cytology(+)<MRI(-)/cytology(-)
395.217	17.55	0.875	0.510638	4.29	1	MRI(+)/cytology(+)>MRI(-)/cytology(-)
404.248	9.74	0.875	0.510638	3.565	1	MRI(+)/cytology(+)<MRI(-)/cytology(-)
408.918	1.47	0.875	0.510638	5.16	1	MRI(+)/cytology(+)<MRI(-)/cytology(-)
414.27	19.08	0.875	0.510638	4.72	1	MRI(+)/cytology(+)>MRI(-)/cytology(-)
425.133	11.97	0.875	0.510638	3.16	1	MRI(+)/cytology(+)>MRI(-)/cytology(-)
427.213	10.82	0.875	0.510638	4.68	1	MRI(+)/cytology(+)>MRI(-)/cytology(-)
427.244	16.48	0.875	0.510638	4.25	1	MRI(+)/cytology(+)>MRI(-)/cytology(-)
430.911	21.63	0.875	0.510638	2.785	1	MRI(+)/cytology(+)>MRI(-)/cytology(-)
438.238	9.11	0.875	0.510638	3.77	1	MRI(+)/cytology(+)>MRI(-)/cytology(-)
438.239	8.24	0.875	0.510638	2.87	1	MRI(+)/cytology(+)>MRI(-)/cytology(-)
459.356	13.84	0.875	0.510638	3.335	1	MRI(+)/cytology(+)>MRI(-)/cytology(-)
476.308	17.12	0.875	0.510638	4.8	1	MRI(+)/cytology(+)>MRI(-)/cytology(-)
481.259	19.75	0.875	0.510638	4.655	1	MRI(+)/cytology(+)<MRI(-)/cytology(-)
498.902	18.96	0.875	0.510638	2.09	0	MRI(+)/cytology(+)<MRI(-)/cytology(-)
519.436	22.34	0.875	0.510638	4.085	1	MRI(+)/cytology(+)>MRI(-)/cytology(-)
528.147	1.94	0.875	0.510638	4.06	1	MRI(+)/cytology(+)>MRI(-)/cytology(-)
549.359	9.89	0.875	0.510638	2.865	1	MRI(+)/cytology(+)<MRI(-)/cytology(-)
568.889	1.65	0.875	0.510638	5.04	1	MRI(+)/cytology(+)<MRI(-)/cytology(-)
629.313	8.65	0.875	0.510638	4.815	1	MRI(+)/cytology(+)<MRI(-)/cytology(-)
637.418	8.92	0.875	0.510638	2.65	1	MRI(+)/cytology(+)>MRI(-)/cytology(-)
637.419	8.78	0.875	0.510638	2.54	1	MRI(+)/cytology(+)>MRI(-)/cytology(-)
679.411	8.61	0.875	0.510638	4.45	1	MRI(+)/cytology(+)<MRI(-)/cytology(-)
702.859	19.62	0.875	0.510638	1.52	0	MRI(+)/cytology(+)<MRI(-)/cytology(-)
702.861	22.12	0.875	0.510638	2.4	0	MRI(+)/cytology(+)>MRI(-)/cytology(-)
702.862	18.95	0.875	0.510638	1.515	0	MRI(+)/cytology(+)<MRI(-)/cytology(-)
702.862	22.25	0.875	0.510638	2.51	0	MRI(+)/cytology(+)>MRI(-)/cytology(-)
740.46	8.71	0.875	0.510638	4.37	1	MRI(+)/cytology(+)<MRI(-)/cytology(-)
838.839	21.92	0.875	0.510638	2.015	0	MRI(+)/cytology(+)>MRI(-)/cytology(-)
906.82	22.34	0.875	0.510638	2.95	1	MRI(+)/cytology(+)>MRI(-)/cytology(-)
907.339	1.67	0.875	0.510638	5.055	1	MRI(+)/cytology(+)>MRI(-)/cytology(-)
941.826	1.59	0.875	0.510638	4.53	1	MRI(+)/cytology(+)<MRI(-)/cytology(-)
1043.81	1.63	0.875	0.510638	4.94	1	MRI(+)/cytology(+)<MRI(-)/cytology(-)
55.9366	23.44	1	0.382979	5.15	1	MRI(+)/cytology(+)>MRI(-)/cytology(-)
59.0517	17.65	1	0.382979	4.045	1	MRI(+)/cytology(+)>MRI(-)/cytology(-)
59.0522	12.7	1	0.382979	4.83	1	MRI(+)/cytology(+)>MRI(-)/cytology(-)
59.0529	18.52	1	0.382979	4.79	1	MRI(+)/cytology(+)>MRI(-)/cytology(-)
68.9951	23.78	1	0.382979	5.12	1	MRI(+)/cytology(+)>MRI(-)/cytology(-)
71.931	23.36	1	0.382979	4.79	1	MRI(+)/cytology(+)>MRI(-)/cytology(-)
85.0406	18.03	1	0.382979	2.68	1	MRI(+)/cytology(+)>MRI(-)/cytology(-)
90.9766	1.75	1	0.382979	3.43	1	MRI(+)/cytology(+)>MRI(-)/cytology(-)
90.9771	1.63	1	0.382979	4.255	1	MRI(+)/cytology(+)>MRI(-)/cytology(-)
91.0537	20.27	1	0.382979	4.705	1	MRI(+)/cytology(+)>MRI(-)/cytology(-)
91.055	21.28	1	0.382979	5	1	MRI(+)/cytology(+)>MRI(-)/cytology(-)
97.9332	23.42	1	0.382979	5.225	1	MRI(+)/cytology(+)>MRI(-)/cytology(-)
98.9615	22.98	1	0.382979	4.68	1	MRI(+)/cytology(+)>MRI(-)/cytology(-)
98.9757	23.04	1	0.382979	4.63	1	MRI(+)/cytology(+)>MRI(-)/cytology(-)
102.127	8.74	1	0.382979	5.015	1	MRI(+)/cytology(+)<MRI(-)/cytology(-)
102.127	24.15	1	0.382979	5.155	1	MRI(+)/cytology(+)<MRI(-)/cytology(-)
102.127	12.72	1	0.382979	5.52	1	MRI(+)/cytology(+)<MRI(-)/cytology(-)
102.129	19.63	1	0.382979	5.67	1	MRI(+)/cytology(+)<MRI(-)/cytology(-)
102.129	10.69	1	0.382979	5.23	1	MRI(+)/cytology(+)<MRI(-)/cytology(-)
102.129	8.79	1	0.382979	4.48	1	MRI(+)/cytology(+)<MRI(-)/cytology(-)
102.129	20.75	1	0.382979	5.705	1	MRI(+)/cytology(+)<MRI(-)/cytology(-)
103.131	20.27	1	0.382979	4.685	1	MRI(+)/cytology(+)<MRI(-)/cytology(-)
103.132	19.71	1	0.382979	4.785	1	MRI(+)/cytology(+)<MRI(-)/cytology(-)
103.133	19.56	1	0.382979	4.77	1	MRI(+)/cytology(+)<MRI(-)/cytology(-)
110.009	22.9	1	0.382979	4.99	1	MRI(+)/cytology(+)<MRI(-)/cytology(-)
122.965	23.53	1	0.382979	5.94	1	MRI(+)/cytology(+)<MRI(-)/cytology(-)
123.1	18.82	1	0.382979	4.34	1	MRI(+)/cytology(+)>MRI(-)/cytology(-)
136.021	19.2	1	0.382979	4.645	1	MRI(+)/cytology(+)<MRI(-)/cytology(-)
161.095	14.38	1	0.382979	4.88	1	MRI(+)/cytology(+)>MRI(-)/cytology(-)
166.096	20.51	1	0.382979	4.91	1	MRI(+)/cytology(+)<MRI(-)/cytology(-)
173.078	20.34	1	0.382979	4.97	1	MRI(+)/cytology(+)<MRI(-)/cytology(-)
192.138	7.59	1	0.382979	3.38	1	MRI(+)/cytology(+)>MRI(-)/cytology(-)
197.099	1.68	1	0.382979	4.29	1	MRI(+)/cytology(+)>MRI(-)/cytology(-)
200.937	22.95	1	0.382979	4.7	1	MRI(+)/cytology(+)<MRI(-)/cytology(-)
250.863	23.07	1	0.382979	4.955	1	MRI(+)/cytology(+)<MRI(-)/cytology(-)
261.131	22.86	1	0.382979	4.98	1	MRI(+)/cytology(+)<MRI(-)/cytology(-)
261.132	22.69	1	0.382979	5.53	1	MRI(+)/cytology(+)>MRI(-)/cytology(-)
269.101	16.17	1	0.382979	4.895	1	MRI(+)/cytology(+)>MRI(-)/cytology(-)
277.126	8.58	1	0.382979	3.81	1	MRI(+)/cytology(+)>MRI(-)/cytology(-)
284.208	8.03	1	0.382979	2.7	1	MRI(+)/cytology(+)>MRI(-)/cytology(-)
284.208	8.64	1	0.382979	3	1	MRI(+)/cytology(+)>MRI(-)/cytology(-)
285.21	8.03	1	0.382979	3.175	1	MRI(+)/cytology(+)>MRI(-)/cytology(-)
293.885	23.03	1	0.382979	4.58	1	MRI(+)/cytology(+)>MRI(-)/cytology(-)
302.145	14.72	1	0.382979	4.89	1	MRI(+)/cytology(+)>MRI(-)/cytology(-)
305.158	22.78	1	0.382979	5.265	1	MRI(+)/cytology(+)<MRI(-)/cytology(-)
306.159	8.83	1	0.382979	3.24	1	MRI(+)/cytology(+)>MRI(-)/cytology(-)
352.831	23.02	1	0.382979	4.51	1	MRI(+)/cytology(+)>MRI(-)/cytology(-)
391.189	8.98	1	0.382979	3.13	1	MRI(+)/cytology(+)<MRI(-)/cytology(-)
426.896	1.33	1	0.382979	4.04	1	MRI(+)/cytology(+)<MRI(-)/cytology(-)
428.067	10.33	1	0.382979	2.46	1	MRI(+)/cytology(+)>MRI(-)/cytology(-)
432.241	11.97	1	0.382979	4.4	1	MRI(+)/cytology(+)<MRI(-)/cytology(-)
439.24	8.67	1	0.382979	3.465	1	MRI(+)/cytology(+)>MRI(-)/cytology(-)
474.834	22.98	1	0.382979	5.91	1	MRI(+)/cytology(+)>MRI(-)/cytology(-)
475.324	8.66	1	0.382979	4.02	1	MRI(+)/cytology(+)<MRI(-)/cytology(-)
483.826	22.94	1	0.382979	3.785	1	MRI(+)/cytology(+)>MRI(-)/cytology(-)
495.8	22.98	1	0.382979	4.225	1	MRI(+)/cytology(+)<MRI(-)/cytology(-)
510.16	2.38	1	0.382979	1.53	0	MRI(+)/cytology(+)>MRI(-)/cytology(-)
526.293	9.91	1	0.382979	3.82	1	MRI(+)/cytology(+)<MRI(-)/cytology(-)
565.367	9.41	1	0.382979	3.625	1	MRI(+)/cytology(+)<MRI(-)/cytology(-)
570.313	9.94	1	0.382979	3.56	1	MRI(+)/cytology(+)<MRI(-)/cytology(-)
612.887	1.46	1	0.382979	5.1	1	MRI(+)/cytology(+)<MRI(-)/cytology(-)
625.745	22.94	1	0.382979	4.24	1	MRI(+)/cytology(+)>MRI(-)/cytology(-)
653.413	8.56	1	0.382979	5.205	1	MRI(+)/cytology(+)<MRI(-)/cytology(-)
654.414	9.07	1	0.382979	2.03	0	MRI(+)/cytology(+)<MRI(-)/cytology(-)
701.392	8.75	1	0.382979	5.185	1	MRI(+)/cytology(+)<MRI(-)/cytology(-)
707.161	20.53	1	0.382979	3.13	0	MRI(+)/cytology(+)>MRI(-)/cytology(-)
724.461	8.75	1	0.382979	4.44	1	MRI(+)/cytology(+)<MRI(-)/cytology(-)
847.331	1.53	1	0.382979	4.23	1	MRI(+)/cytology(+)<MRI(-)/cytology(-)
873.843	1.67	1	0.382979	4.795	1	MRI(+)/cytology(+)>MRI(-)/cytology(-)
880.813	1.63	1	0.382979	5.16	1	MRI(+)/cytology(+)<MRI(-)/cytology(-)
110.071	21.78	0.375	1	4.375	1	MRI(+)/cytology(+)>MRI(-)/cytology(-)
183.085	2.09	0.375	1	4.475	1	MRI(+)/cytology(+)>MRI(-)/cytology(-)
418.077	2.12	0.375	1	4.505	1	MRI(+)/cytology(+)>MRI(-)/cytology(-)
610.394	9.96	0.375	1	0.67	0	MRI(+)/cytology(+)<MRI(-)/cytology(-)
59.0515	8.49	0.5	0.87234	4.755	1	MRI(+)/cytology(+)>MRI(-)/cytology(-)
59.0518	23.21	0.5	0.87234	5.25	1	MRI(+)/cytology(+)>MRI(-)/cytology(-)
105.033	8.42	0.5	0.87234	3.18	1	MRI(+)/cytology(+)>MRI(-)/cytology(-)
110.071	19.35	0.5	0.87234	4.355	1	MRI(+)/cytology(+)>MRI(-)/cytology(-)
110.072	18.55	0.5	0.87234	4.285	1	MRI(+)/cytology(+)>MRI(-)/cytology(-)
158.963	19.87	0.5	0.87234	4.58	1	MRI(+)/cytology(+)>MRI(-)/cytology(-)
194.096	8.54	0.5	0.87234	2.99	1	MRI(+)/cytology(+)>MRI(-)/cytology(-)
204.123	2.32	0.5	0.87234	4.435	1	MRI(+)/cytology(+)>MRI(-)/cytology(-)
221.115	14.51	0.5	0.87234	4.61	1	MRI(+)/cytology(+)<MRI(-)/cytology(-)
226.18	11.12	0.5	0.87234	3.4	1	MRI(+)/cytology(+)<MRI(-)/cytology(-)
239.968	22.89	0.5	0.87234	4.51	1	MRI(+)/cytology(+)>MRI(-)/cytology(-)
248.166	8.08	0.5	0.87234	3.165	1	MRI(+)/cytology(+)>MRI(-)/cytology(-)
255.064	8.49	0.5	0.87234	2.99	1	MRI(+)/cytology(+)>MRI(-)/cytology(-)
255.067	7.99	0.5	0.87234	2.86	1	MRI(+)/cytology(+)>MRI(-)/cytology(-)
262.136	19.8	0.5	0.87234	4.89	1	MRI(+)/cytology(+)>MRI(-)/cytology(-)
275.14	7.88	0.5	0.87234	2.88	1	MRI(+)/cytology(+)>MRI(-)/cytology(-)
281.248	13.44	0.5	0.87234	4.31	1	MRI(+)/cytology(+)<MRI(-)/cytology(-)
305.158	21.92	0.5	0.87234	5.4	1	MRI(+)/cytology(+)>MRI(-)/cytology(-)
348.726	8.55	0.5	0.87234	4.225	0	MRI(+)/cytology(+)>MRI(-)/cytology(-)
349.182	21.92	0.5	0.87234	5.26	1	MRI(+)/cytology(+)>MRI(-)/cytology(-)
349.182	19.4	0.5	0.87234	5.56	1	MRI(+)/cytology(+)>MRI(-)/cytology(-)
349.184	9.74	0.5	0.87234	4.175	1	MRI(+)/cytology(+)<MRI(-)/cytology(-)
365.178	9.1	0.5	0.87234	3.96	1	MRI(+)/cytology(+)>MRI(-)/cytology(-)
372.26	8.57	0.5	0.87234	3.87	1	MRI(+)/cytology(+)<MRI(-)/cytology(-)
404.249	9.15	0.5	0.87234	3.55	1	MRI(+)/cytology(+)>MRI(-)/cytology(-)
408.409	8.25	0.5	0.87234	1.93	0	MRI(+)/cytology(+)>MRI(-)/cytology(-)
417.261	8.88	0.5	0.87234	3.115	1	MRI(+)/cytology(+)<MRI(-)/cytology(-)
424.204	12.58	0.5	0.87234	3.26	1	MRI(+)/cytology(+)>MRI(-)/cytology(-)
454.232	8.77	0.5	0.87234	3.04	1	MRI(+)/cytology(+)<MRI(-)/cytology(-)
474.291	8.67	0.5	0.87234	3.335	1	MRI(+)/cytology(+)<MRI(-)/cytology(-)
481.259	8.26	0.5	0.87234	6.44	1	MRI(+)/cytology(+)>MRI(-)/cytology(-)
481.264	19.8	0.5	0.87234	5.04	1	MRI(+)/cytology(+)>MRI(-)/cytology(-)
498.902	20.17	0.5	0.87234	1.19	0	MRI(+)/cytology(+)<MRI(-)/cytology(-)
544.34	13.31	0.5	0.87234	3.02	1	MRI(+)/cytology(+)<MRI(-)/cytology(-)
562.14	7.93	0.5	0.87234	1.55	0	MRI(+)/cytology(+)<MRI(-)/cytology(-)
564.361	8.46	0.5	0.87234	6.27	1	MRI(+)/cytology(+)>MRI(-)/cytology(-)
565.359	9.23	0.5	0.87234	3.4	1	MRI(+)/cytology(+)<MRI(-)/cytology(-)
572.323	8.4	0.5	0.87234	4.48	1	MRI(+)/cytology(+)>MRI(-)/cytology(-)
585.308	8.41	0.5	0.87234	5.08	1	MRI(+)/cytology(+)>MRI(-)/cytology(-)
591.365	9.06	0.5	0.87234	3.23	1	MRI(+)/cytology(+)<MRI(-)/cytology(-)
614.342	8.91	0.5	0.87234	2.98	1	MRI(+)/cytology(+)<MRI(-)/cytology(-)
629.32	8.48	0.5	0.87234	4.87	1	MRI(+)/cytology(+)>MRI(-)/cytology(-)
629.33	8.44	0.5	0.87234	4.695	1	MRI(+)/cytology(+)>MRI(-)/cytology(-)
629.334	8.36	0.5	0.87234	4.58	1	MRI(+)/cytology(+)>MRI(-)/cytology(-)
633.15	18.59	0.5	0.87234	4.62	1	MRI(+)/cytology(+)>MRI(-)/cytology(-)
654.423	8.52	0.5	0.87234	4.175	0	MRI(+)/cytology(+)>MRI(-)/cytology(-)
701.39	8.53	0.5	0.87234	4.74	1	MRI(+)/cytology(+)>MRI(-)/cytology(-)
701.394	8.61	0.5	0.87234	5.08	1	MRI(+)/cytology(+)>MRI(-)/cytology(-)
702.398	8.63	0.5	0.87234	4.63	1	MRI(+)/cytology(+)>MRI(-)/cytology(-)
707.171	20.64	0.5	0.87234	4.65	1	MRI(+)/cytology(+)>MRI(-)/cytology(-)
59.0527	8.99	0.625	0.744681	5.42	1	MRI(+)/cytology(+)>MRI(-)/cytology(-)
59.0527	9.09	0.625	0.744681	5.19	1	MRI(+)/cytology(+)>MRI(-)/cytology(-)
68.9951	23.97	0.625	0.744681	4.875	1	MRI(+)/cytology(+)>MRI(-)/cytology(-)
71.9303	23.67	0.625	0.744681	5.04	1	MRI(+)/cytology(+)>MRI(-)/cytology(-)
82.0527	14.96	0.625	0.744681	2.765	1	MRI(+)/cytology(+)<MRI(-)/cytology(-)
82.053	19.85	0.625	0.744681	3.76	1	MRI(+)/cytology(+)>MRI(-)/cytology(-)
85.029	2.16	0.625	0.744681	4.755	1	MRI(+)/cytology(+)>MRI(-)/cytology(-)
102.128	18.32	0.625	0.744681	5.31	1	MRI(+)/cytology(+)<MRI(-)/cytology(-)
102.128	17.71	0.625	0.744681	5.205	1	MRI(+)/cytology(+)<MRI(-)/cytology(-)
102.129	17.06	0.625	0.744681	5.26	1	MRI(+)/cytology(+)<MRI(-)/cytology(-)
102.129	21.87	0.625	0.744681	5.4	1	MRI(+)/cytology(+)<MRI(-)/cytology(-)
103.054	8.3	0.625	0.744681	3.07	1	MRI(+)/cytology(+)>MRI(-)/cytology(-)
125.985	1.33	0.625	0.744681	4.24	1	MRI(+)/cytology(+)>MRI(-)/cytology(-)
136.021	19.48	0.625	0.744681	4.92	1	MRI(+)/cytology(+)>MRI(-)/cytology(-)
141.959	23.63	0.625	0.744681	5.7	1	MRI(+)/cytology(+)>MRI(-)/cytology(-)
158.155	11.77	0.625	0.744681	5.275	1	MRI(+)/cytology(+)>MRI(-)/cytology(-)
158.964	22.32	0.625	0.744681	4.93	1	MRI(+)/cytology(+)>MRI(-)/cytology(-)
166.096	19.19	0.625	0.744681	4.95	1	MRI(+)/cytology(+)>MRI(-)/cytology(-)
166.097	18.25	0.625	0.744681	4.96	1	MRI(+)/cytology(+)>MRI(-)/cytology(-)
192.137	7.46	0.625	0.744681	3.44	1	MRI(+)/cytology(+)>MRI(-)/cytology(-)
195.102	13.07	0.625	0.744681	4.875	1	MRI(+)/cytology(+)>MRI(-)/cytology(-)
195.119	9	0.625	0.744681	4.19	1	MRI(+)/cytology(+)>MRI(-)/cytology(-)
200.545	2.07	0.625	0.744681	4.32	1	MRI(+)/cytology(+)<MRI(-)/cytology(-)
202.217	9.18	0.625	0.744681	3.83	1	MRI(+)/cytology(+)<MRI(-)/cytology(-)
203.217	8.95	0.625	0.744681	4.21	0	MRI(+)/cytology(+)>MRI(-)/cytology(-)
205.085	14.8	0.625	0.744681	4.655	1	MRI(+)/cytology(+)<MRI(-)/cytology(-)
217.104	15.86	0.625	0.744681	4.82	1	MRI(+)/cytology(+)>MRI(-)/cytology(-)
217.105	17.91	0.625	0.744681	5.73	1	MRI(+)/cytology(+)>MRI(-)/cytology(-)
226.951	22.35	0.625	0.744681	5.155	1	MRI(+)/cytology(+)>MRI(-)/cytology(-)
230.142	17.41	0.625	0.744681	4.645	1	MRI(+)/cytology(+)>MRI(-)/cytology(-)
239.148	18.19	0.625	0.744681	5.32	1	MRI(+)/cytology(+)>MRI(-)/cytology(-)
240.18	8.11	0.625	0.744681	3.24	1	MRI(+)/cytology(+)<MRI(-)/cytology(-)
249.133	8.25	0.625	0.744681	3.1	1	MRI(+)/cytology(+)>MRI(-)/cytology(-)
261.131	19.87	0.625	0.744681	5.765	1	MRI(+)/cytology(+)>MRI(-)/cytology(-)
266.173	10.81	0.625	0.744681	4.195	1	MRI(+)/cytology(+)<MRI(-)/cytology(-)
277.125	7.62	0.625	0.744681	3.43	1	MRI(+)/cytology(+)>MRI(-)/cytology(-)
301.14	19.39	0.625	0.744681	4.46	1	MRI(+)/cytology(+)>MRI(-)/cytology(-)
303.144	7.81	0.625	0.744681	2.97	1	MRI(+)/cytology(+)>MRI(-)/cytology(-)
322.159	8.36	0.625	0.744681	3.33	1	MRI(+)/cytology(+)<MRI(-)/cytology(-)
338.342	20.15	0.625	0.744681	5.195	1	MRI(+)/cytology(+)>MRI(-)/cytology(-)
349.182	21.63	0.625	0.744681	5.11	1	MRI(+)/cytology(+)>MRI(-)/cytology(-)
349.184	18.71	0.625	0.744681	5.46	1	MRI(+)/cytology(+)>MRI(-)/cytology(-)
349.185	17.94	0.625	0.744681	5.105	1	MRI(+)/cytology(+)>MRI(-)/cytology(-)
353.228	11.93	0.625	0.744681	4.17	1	MRI(+)/cytology(+)<MRI(-)/cytology(-)
395.22	8.33	0.625	0.744681	3.675	1	MRI(+)/cytology(+)<MRI(-)/cytology(-)
413.266	19.87	0.625	0.744681	4.845	1	MRI(+)/cytology(+)>MRI(-)/cytology(-)
416.254	9.28	0.625	0.744681	3.95	1	MRI(+)/cytology(+)<MRI(-)/cytology(-)
416.259	8.65	0.625	0.744681	3.46	1	MRI(+)/cytology(+)<MRI(-)/cytology(-)
460.312	8.45	0.625	0.744681	4.625	1	MRI(+)/cytology(+)<MRI(-)/cytology(-)
461.311	8.65	0.625	0.744681	3.76	1	MRI(+)/cytology(+)<MRI(-)/cytology(-)
462.314	8.57	0.625	0.744681	2.615	0	MRI(+)/cytology(+)<MRI(-)/cytology(-)
463.233	10.82	0.625	0.744681	3.15	1	MRI(+)/cytology(+)>MRI(-)/cytology(-)
476.304	18.83	0.625	0.744681	4.965	1	MRI(+)/cytology(+)>MRI(-)/cytology(-)
481.26	19.62	0.625	0.744681	4.175	1	MRI(+)/cytology(+)<MRI(-)/cytology(-)
501.173	10.8	0.625	0.744681	2.04	0	MRI(+)/cytology(+)>MRI(-)/cytology(-)
526.288	8.66	0.625	0.744681	4.2	1	MRI(+)/cytology(+)<MRI(-)/cytology(-)
541.272	8.95	0.625	0.744681	3.31	1	MRI(+)/cytology(+)<MRI(-)/cytology(-)
544.341	13.34	0.625	0.744681	3.58	1	MRI(+)/cytology(+)<MRI(-)/cytology(-)
547.329	8.72	0.625	0.744681	4.1	1	MRI(+)/cytology(+)<MRI(-)/cytology(-)
565.36	9.02	0.625	0.744681	3.63	1	MRI(+)/cytology(+)<MRI(-)/cytology(-)
570.313	8.8	0.625	0.744681	3.94	1	MRI(+)/cytology(+)<MRI(-)/cytology(-)
570.318	8.6	0.625	0.744681	3.93	1	MRI(+)/cytology(+)<MRI(-)/cytology(-)
593.388	8.68	0.625	0.744681	3.16	1	MRI(+)/cytology(+)<MRI(-)/cytology(-)
608.388	9.96	0.625	0.744681	3.82	1	MRI(+)/cytology(+)<MRI(-)/cytology(-)
633.152	18.61	0.625	0.744681	4.55	1	MRI(+)/cytology(+)>MRI(-)/cytology(-)
654.416	8.98	0.625	0.744681	1.705	0	MRI(+)/cytology(+)<MRI(-)/cytology(-)
702.86	22.34	0.625	0.744681	4.705	1	MRI(+)/cytology(+)>MRI(-)/cytology(-)
853.726	22.34	0.625	0.744681	4.67	1	MRI(+)/cytology(+)>MRI(-)/cytology(-)
853.729	19.64	0.625	0.744681	4.1	0	MRI(+)/cytology(+)>MRI(-)/cytology(-)
854.728	19.46	0.625	0.744681	3.855	0	MRI(+)/cytology(+)>MRI(-)/cytology(-)
53.0049	1.88	0.75	0.617021	5.2	1	MRI(+)/cytology(+)>MRI(-)/cytology(-)
73.067	1.8	0.75	0.617021	4.915	1	MRI(+)/cytology(+)>MRI(-)/cytology(-)
83.9977	23.07	0.75	0.617021	5.06	1	MRI(+)/cytology(+)>MRI(-)/cytology(-)
84.9466	23.08	0.75	0.617021	4.435	1	MRI(+)/cytology(+)>MRI(-)/cytology(-)
102.126	19.08	0.75	0.617021	4.395	1	MRI(+)/cytology(+)<MRI(-)/cytology(-)
102.127	7.67	0.75	0.617021	5.165	1	MRI(+)/cytology(+)<MRI(-)/cytology(-)
102.128	19.5	0.75	0.617021	5.13	1	MRI(+)/cytology(+)<MRI(-)/cytology(-)
102.129	4.63	0.75	0.617021	4.55	1	MRI(+)/cytology(+)<MRI(-)/cytology(-)
102.129	9.35	0.75	0.617021	5.055	1	MRI(+)/cytology(+)<MRI(-)/cytology(-)
102.129	28.01	0.75	0.617021	4.57	1	MRI(+)/cytology(+)<MRI(-)/cytology(-)
110.07	20.01	0.75	0.617021	3.905	1	MRI(+)/cytology(+)>MRI(-)/cytology(-)
118.086	2.4	0.75	0.617021	3.93	1	MRI(+)/cytology(+)>MRI(-)/cytology(-)
166.098	19.97	0.75	0.617021	4.93	1	MRI(+)/cytology(+)>MRI(-)/cytology(-)
173.077	19.58	0.75	0.617021	4.745	1	MRI(+)/cytology(+)<MRI(-)/cytology(-)
173.078	17.93	0.75	0.617021	4.76	1	MRI(+)/cytology(+)>MRI(-)/cytology(-)
193.095	8	0.75	0.617021	3.61	1	MRI(+)/cytology(+)>MRI(-)/cytology(-)
214.254	10.22	0.75	0.617021	4.58	1	MRI(+)/cytology(+)<MRI(-)/cytology(-)
218.111	18.85	0.75	0.617021	4.58	1	MRI(+)/cytology(+)>MRI(-)/cytology(-)
226.953	20.2	0.75	0.617021	2.43	1	MRI(+)/cytology(+)<MRI(-)/cytology(-)
228.195	17.47	0.75	0.617021	3.75	1	MRI(+)/cytology(+)>MRI(-)/cytology(-)
230.14	19.32	0.75	0.617021	4.54	1	MRI(+)/cytology(+)>MRI(-)/cytology(-)
239.148	19.32	0.75	0.617021	5.42	1	MRI(+)/cytology(+)>MRI(-)/cytology(-)
239.161	1.54	0.75	0.617021	4.41	1	MRI(+)/cytology(+)>MRI(-)/cytology(-)
240.153	8.43	0.75	0.617021	3.46	1	MRI(+)/cytology(+)>MRI(-)/cytology(-)
242.926	1.57	0.75	0.617021	5.125	1	MRI(+)/cytology(+)<MRI(-)/cytology(-)
258.281	10.91	0.75	0.617021	3.75	1	MRI(+)/cytology(+)<MRI(-)/cytology(-)
261.131	18.8	0.75	0.617021	5.27	1	MRI(+)/cytology(+)>MRI(-)/cytology(-)
262.236	9.16	0.75	0.617021	4.035	1	MRI(+)/cytology(+)<MRI(-)/cytology(-)
266.075	2.36	0.75	0.617021	3.21	1	MRI(+)/cytology(+)<MRI(-)/cytology(-)
277.125	7.75	0.75	0.617021	3.38	1	MRI(+)/cytology(+)>MRI(-)/cytology(-)
296.069	9.69	0.75	0.617021	2.73	1	MRI(+)/cytology(+)>MRI(-)/cytology(-)
296.072	9.72	0.75	0.617021	2.81	1	MRI(+)/cytology(+)>MRI(-)/cytology(-)
302.306	10.49	0.75	0.617021	5.55	1	MRI(+)/cytology(+)>MRI(-)/cytology(-)
305.156	17.94	0.75	0.617021	5.195	1	MRI(+)/cytology(+)>MRI(-)/cytology(-)
305.158	17.32	0.75	0.617021	5.27	1	MRI(+)/cytology(+)>MRI(-)/cytology(-)
307.175	8.44	0.75	0.617021	3.99	1	MRI(+)/cytology(+)>MRI(-)/cytology(-)
318.663	9.07	0.75	0.617021	2.15	0	MRI(+)/cytology(+)<MRI(-)/cytology(-)
318.669	8.83	0.75	0.617021	2.05	0	MRI(+)/cytology(+)<MRI(-)/cytology(-)
328.232	8.92	0.75	0.617021	3.66	1	MRI(+)/cytology(+)<MRI(-)/cytology(-)
337.234	17.34	0.75	0.617021	5.39	1	MRI(+)/cytology(+)>MRI(-)/cytology(-)
344.227	7.72	0.75	0.617021	2.56	1	MRI(+)/cytology(+)>MRI(-)/cytology(-)
345.23	8.15	0.75	0.617021	4.105	1	MRI(+)/cytology(+)<MRI(-)/cytology(-)
349.185	17.17	0.75	0.617021	4.65	1	MRI(+)/cytology(+)>MRI(-)/cytology(-)
372.26	8.21	0.75	0.617021	4.775	1	MRI(+)/cytology(+)<MRI(-)/cytology(-)
385.176	22.55	0.75	0.617021	4.35	1	MRI(+)/cytology(+)>MRI(-)/cytology(-)
389.255	9.06	0.75	0.617021	3.64	1	MRI(+)/cytology(+)<MRI(-)/cytology(-)
404.248	8.98	0.75	0.617021	3.48	1	MRI(+)/cytology(+)<MRI(-)/cytology(-)
413.267	19.99	0.75	0.617021	4.56	1	MRI(+)/cytology(+)>MRI(-)/cytology(-)
418.288	8.4	0.75	0.617021	3.03	1	MRI(+)/cytology(+)<MRI(-)/cytology(-)
437.193	19.96	0.75	0.617021	4.575	1	MRI(+)/cytology(+)>MRI(-)/cytology(-)
438.238	8.39	0.75	0.617021	4.19	1	MRI(+)/cytology(+)<MRI(-)/cytology(-)
478.292	13.31	0.75	0.617021	3.9	1	MRI(+)/cytology(+)<MRI(-)/cytology(-)
478.322	9.88	0.75	0.617021	3.07	1	MRI(+)/cytology(+)<MRI(-)/cytology(-)
481.259	18.65	0.75	0.617021	4.045	1	MRI(+)/cytology(+)>MRI(-)/cytology(-)
497.256	8.4	0.75	0.617021	4.985	1	MRI(+)/cytology(+)<MRI(-)/cytology(-)
498.899	20.86	0.75	0.617021	1.835	0	MRI(+)/cytology(+)>MRI(-)/cytology(-)
523.34	8.98	0.75	0.617021	1.79	0	MRI(+)/cytology(+)<MRI(-)/cytology(-)
550.366	8.56	0.75	0.617021	3.89	0	MRI(+)/cytology(+)<MRI(-)/cytology(-)
566.887	1.71	0.75	0.617021	5.51	1	MRI(+)/cytology(+)>MRI(-)/cytology(-)
567.371	8.88	0.75	0.617021	1.72	0	MRI(+)/cytology(+)>MRI(-)/cytology(-)
580.351	8.56	0.75	0.617021	4.605	1	MRI(+)/cytology(+)<MRI(-)/cytology(-)
595.809	8.35	0.75	0.617021	3.3	1	MRI(+)/cytology(+)<MRI(-)/cytology(-)
624.371	8.45	0.75	0.617021	4.05	1	MRI(+)/cytology(+)<MRI(-)/cytology(-)
640.737	23	0.75	0.617021	4.41	1	MRI(+)/cytology(+)<MRI(-)/cytology(-)
652.411	9.18	0.75	0.617021	3.295	1	MRI(+)/cytology(+)<MRI(-)/cytology(-)
696.432	9.13	0.75	0.617021	2.99	1	MRI(+)/cytology(+)>MRI(-)/cytology(-)
778.835	1.62	0.75	0.617021	5.065	1	MRI(+)/cytology(+)<MRI(-)/cytology(-)
795.791	19.01	0.75	0.617021	3.505	0	MRI(+)/cytology(+)>MRI(-)/cytology(-)
853.729	17.62	0.75	0.617021	4.04	1	MRI(+)/cytology(+)>MRI(-)/cytology(-)
854.73	20.33	0.75	0.617021	3.505	0	MRI(+)/cytology(+)>MRI(-)/cytology(-)
68.9951	23.81	0.875	0.489362	5.47	1	MRI(+)/cytology(+)>MRI(-)/cytology(-)
71.9307	23.51	0.875	0.489362	5.4	1	MRI(+)/cytology(+)>MRI(-)/cytology(-)
76.4872	23.57	0.875	0.489362	5.07	1	MRI(+)/cytology(+)>MRI(-)/cytology(-)
76.4873	23.5	0.875	0.489362	5.045	1	MRI(+)/cytology(+)>MRI(-)/cytology(-)
81.9384	23.75	0.875	0.489362	5.33	1	MRI(+)/cytology(+)>MRI(-)/cytology(-)
82.0539	16.6	0.875	0.489362	3.005	1	MRI(+)/cytology(+)>MRI(-)/cytology(-)
82.054	16.67	0.875	0.489362	3.2	1	MRI(+)/cytology(+)<MRI(-)/cytology(-)
82.9974	23.72	0.875	0.489362	5.05	1	MRI(+)/cytology(+)>MRI(-)/cytology(-)
82.9975	23.81	0.875	0.489362	5.125	1	MRI(+)/cytology(+)>MRI(-)/cytology(-)
82.9976	23.75	0.875	0.489362	5.11	1	MRI(+)/cytology(+)>MRI(-)/cytology(-)
84.0452	1.92	0.875	0.489362	5.15	1	MRI(+)/cytology(+)>MRI(-)/cytology(-)
85.9389	23.2	0.875	0.489362	4.77	1	MRI(+)/cytology(+)>MRI(-)/cytology(-)
88.9324	23.72	0.875	0.489362	5.24	1	MRI(+)/cytology(+)>MRI(-)/cytology(-)
90.4888	23.53	0.875	0.489362	4.83	1	MRI(+)/cytology(+)>MRI(-)/cytology(-)
90.4904	23.6	0.875	0.489362	4.81	1	MRI(+)/cytology(+)>MRI(-)/cytology(-)
97.9319	23.53	0.875	0.489362	5.54	1	MRI(+)/cytology(+)>MRI(-)/cytology(-)
97.9519	23.03	0.875	0.489362	4.8	1	MRI(+)/cytology(+)>MRI(-)/cytology(-)
99.9475	23.49	0.875	0.489362	5.14	1	MRI(+)/cytology(+)>MRI(-)/cytology(-)
102.127	15.21	0.875	0.489362	4.46	1	MRI(+)/cytology(+)<MRI(-)/cytology(-)
102.128	17.3	0.875	0.489362	5.38	1	MRI(+)/cytology(+)<MRI(-)/cytology(-)
102.128	21.2	0.875	0.489362	5.25	1	MRI(+)/cytology(+)<MRI(-)/cytology(-)
102.128	21.39	0.875	0.489362	5.06	1	MRI(+)/cytology(+)<MRI(-)/cytology(-)
102.128	16.42	0.875	0.489362	5.65	1	MRI(+)/cytology(+)<MRI(-)/cytology(-)
102.129	21.42	0.875	0.489362	5.46	1	MRI(+)/cytology(+)<MRI(-)/cytology(-)
102.129	9.18	0.875	0.489362	5.085	1	MRI(+)/cytology(+)<MRI(-)/cytology(-)
103.131	20.12	0.875	0.489362	4.59	1	MRI(+)/cytology(+)<MRI(-)/cytology(-)
105.032	8.48	0.875	0.489362	2.82	0	MRI(+)/cytology(+)>MRI(-)/cytology(-)
106.078	20.46	0.875	0.489362	4.805	1	MRI(+)/cytology(+)>MRI(-)/cytology(-)
107.085	1.81	0.875	0.489362	5.12	1	MRI(+)/cytology(+)>MRI(-)/cytology(-)
114.955	23.08	0.875	0.489362	5.25	1	MRI(+)/cytology(+)>MRI(-)/cytology(-)
123.099	19.59	0.875	0.489362	4.625	1	MRI(+)/cytology(+)>MRI(-)/cytology(-)
123.1	19.74	0.875	0.489362	4.685	1	MRI(+)/cytology(+)<MRI(-)/cytology(-)
124.087	14.85	0.875	0.489362	4.735	1	MRI(+)/cytology(+)<MRI(-)/cytology(-)
136.021	16.89	0.875	0.489362	4.72	1	MRI(+)/cytology(+)>MRI(-)/cytology(-)
138.091	18.78	0.875	0.489362	4.24	1	MRI(+)/cytology(+)>MRI(-)/cytology(-)
158.964	22.26	0.875	0.489362	3.91	1	MRI(+)/cytology(+)>MRI(-)/cytology(-)
165.111	17.56	0.875	0.489362	4.42	1	MRI(+)/cytology(+)>MRI(-)/cytology(-)
165.113	22.83	0.875	0.489362	3.95	1	MRI(+)/cytology(+)<MRI(-)/cytology(-)
166.099	17.62	0.875	0.489362	4.87	1	MRI(+)/cytology(+)>MRI(-)/cytology(-)
170.119	8.13	0.875	0.489362	2.57	1	MRI(+)/cytology(+)<MRI(-)/cytology(-)
173.077	22.39	0.875	0.489362	5.07	1	MRI(+)/cytology(+)>MRI(-)/cytology(-)
173.078	20.36	0.875	0.489362	4.805	1	MRI(+)/cytology(+)<MRI(-)/cytology(-)
174.187	8.31	0.875	0.489362	4.14	0	MRI(+)/cytology(+)<MRI(-)/cytology(-)
194.097	8.18	0.875	0.489362	3.105	1	MRI(+)/cytology(+)>MRI(-)/cytology(-)
226.953	22.24	0.875	0.489362	3.53	1	MRI(+)/cytology(+)>MRI(-)/cytology(-)
227.105	8.44	0.875	0.489362	3.36	1	MRI(+)/cytology(+)<MRI(-)/cytology(-)
229.139	9.69	0.875	0.489362	3.82	1	MRI(+)/cytology(+)>MRI(-)/cytology(-)
233.099	8.4	0.875	0.489362	3.685	1	MRI(+)/cytology(+)>MRI(-)/cytology(-)
261.13	22.7	0.875	0.489362	5.39	1	MRI(+)/cytology(+)>MRI(-)/cytology(-)
261.13	19.59	0.875	0.489362	5.51	1	MRI(+)/cytology(+)<MRI(-)/cytology(-)
261.132	8.87	0.875	0.489362	4.27	1	MRI(+)/cytology(+)>MRI(-)/cytology(-)
271.128	8.45	0.875	0.489362	3.935	1	MRI(+)/cytology(+)<MRI(-)/cytology(-)
274.275	22.52	0.875	0.489362	4.775	1	MRI(+)/cytology(+)>MRI(-)/cytology(-)
283.173	17.55	0.875	0.489362	4.72	1	MRI(+)/cytology(+)>MRI(-)/cytology(-)
295.228	11.45	0.875	0.489362	4.7	1	MRI(+)/cytology(+)<MRI(-)/cytology(-)
305.158	22.53	0.875	0.489362	5.58	1	MRI(+)/cytology(+)>MRI(-)/cytology(-)
305.159	22.52	0.875	0.489362	5.585	1	MRI(+)/cytology(+)>MRI(-)/cytology(-)
313.273	16.98	0.875	0.489362	4.655	1	MRI(+)/cytology(+)>MRI(-)/cytology(-)
318.164	8.59	0.875	0.489362	4.8	1	MRI(+)/cytology(+)<MRI(-)/cytology(-)
321.316	19.72	0.875	0.489362	3.77	1	MRI(+)/cytology(+)>MRI(-)/cytology(-)
344.228	8.77	0.875	0.489362	4	1	MRI(+)/cytology(+)>MRI(-)/cytology(-)
362.924	19.67	0.875	0.489362	2.515	0	MRI(+)/cytology(+)<MRI(-)/cytology(-)
367.149	7.77	0.875	0.489362	2.735	1	MRI(+)/cytology(+)>MRI(-)/cytology(-)
372.229	8.32	0.875	0.489362	3.49	0	MRI(+)/cytology(+)<MRI(-)/cytology(-)
382.926	1.33	0.875	0.489362	3.885	1	MRI(+)/cytology(+)<MRI(-)/cytology(-)
391.283	19.21	0.875	0.489362	5	1	MRI(+)/cytology(+)<MRI(-)/cytology(-)
391.285	19.13	0.875	0.489362	5.155	1	MRI(+)/cytology(+)>MRI(-)/cytology(-)
416.255	9.84	0.875	0.489362	3.93	1	MRI(+)/cytology(+)<MRI(-)/cytology(-)
432.282	9.84	0.875	0.489362	4.805	1	MRI(+)/cytology(+)<MRI(-)/cytology(-)
453.213	8.32	0.875	0.489362	3.99	1	MRI(+)/cytology(+)<MRI(-)/cytology(-)
474.289	8.33	0.875	0.489362	4.22	1	MRI(+)/cytology(+)<MRI(-)/cytology(-)
477.307	9.88	0.875	0.489362	4.06	1	MRI(+)/cytology(+)<MRI(-)/cytology(-)
478.322	11.52	0.875	0.489362	3.47	1	MRI(+)/cytology(+)<MRI(-)/cytology(-)
479.242	8.27	0.875	0.489362	4.33	1	MRI(+)/cytology(+)<MRI(-)/cytology(-)
481.26	9.16	0.875	0.489362	4.61	1	MRI(+)/cytology(+)>MRI(-)/cytology(-)
481.261	19.72	0.875	0.489362	4.46	1	MRI(+)/cytology(+)<MRI(-)/cytology(-)
484.267	8.2	0.875	0.489362	2.28	1	MRI(+)/cytology(+)>MRI(-)/cytology(-)
504.337	8.39	0.875	0.489362	5.93	1	MRI(+)/cytology(+)<MRI(-)/cytology(-)
505.342	8.41	0.875	0.489362	5.005	1	MRI(+)/cytology(+)<MRI(-)/cytology(-)
527.297	8.32	0.875	0.489362	2.565	1	MRI(+)/cytology(+)>MRI(-)/cytology(-)
566.889	1.59	0.875	0.489362	6.15	1	MRI(+)/cytology(+)<MRI(-)/cytology(-)
572.323	8.52	0.875	0.489362	3.75	1	MRI(+)/cytology(+)<MRI(-)/cytology(-)
592.387	8.51	0.875	0.489362	5.56	1	MRI(+)/cytology(+)<MRI(-)/cytology(-)
615.339	9.43	0.875	0.489362	2.07	0	MRI(+)/cytology(+)<MRI(-)/cytology(-)
622.764	23	0.875	0.489362	4.34	1	MRI(+)/cytology(+)<MRI(-)/cytology(-)
657.375	9.48	0.875	0.489362	3.29	1	MRI(+)/cytology(+)<MRI(-)/cytology(-)
658.369	9.18	0.875	0.489362	2.64	1	MRI(+)/cytology(+)>MRI(-)/cytology(-)
668.87	1.71	0.875	0.489362	4.45	1	MRI(+)/cytology(+)>MRI(-)/cytology(-)
710.847	1.61	0.875	0.489362	4.885	1	MRI(+)/cytology(+)<MRI(-)/cytology(-)
744.841	1.59	0.875	0.489362	5.17	1	MRI(+)/cytology(+)<MRI(-)/cytology(-)
770.848	19.79	0.875	0.489362	1.795	0	MRI(+)/cytology(+)>MRI(-)/cytology(-)
838.845	22.24	0.875	0.489362	2.37	1	MRI(+)/cytology(+)>MRI(-)/cytology(-)
906.824	22.32	0.875	0.489362	2.98	1	MRI(+)/cytology(+)>MRI(-)/cytology(-)
975.819	1.61	0.875	0.489362	5.04	1	MRI(+)/cytology(+)<MRI(-)/cytology(-)
982.805	1.59	0.875	0.489362	4.52	1	MRI(+)/cytology(+)<MRI(-)/cytology(-)
1077.31	1.67	0.875	0.489362	4.97	1	MRI(+)/cytology(+)>MRI(-)/cytology(-)
1144.78	1.71	0.875	0.489362	5.33	1	MRI(+)/cytology(+)>MRI(-)/cytology(-)
55.9364	23.74	1	0.361702	4.8	1	MRI(+)/cytology(+)>MRI(-)/cytology(-)
70.9418	23.47	1	0.361702	4.75	1	MRI(+)/cytology(+)>MRI(-)/cytology(-)
72.9385	23.44	1	0.361702	5.91	1	MRI(+)/cytology(+)>MRI(-)/cytology(-)
82.0529	21.28	1	0.361702	3.93	1	MRI(+)/cytology(+)>MRI(-)/cytology(-)
85.0408	22.28	1	0.361702	3.205	1	MRI(+)/cytology(+)<MRI(-)/cytology(-)
87.9244	23.82	1	0.361702	4.85	1	MRI(+)/cytology(+)>MRI(-)/cytology(-)
88.9906	1.33	1	0.361702	4.12	1	MRI(+)/cytology(+)>MRI(-)/cytology(-)
90.9762	1.73	1	0.361702	3.415	1	MRI(+)/cytology(+)>MRI(-)/cytology(-)
91.0547	2.2	1	0.361702	4.74	1	MRI(+)/cytology(+)>MRI(-)/cytology(-)
91.0549	17.6	1	0.361702	3.59	1	MRI(+)/cytology(+)>MRI(-)/cytology(-)
97.9694	23.64	1	0.361702	5.2	1	MRI(+)/cytology(+)>MRI(-)/cytology(-)
102.126	16.82	1	0.361702	4.64	1	MRI(+)/cytology(+)<MRI(-)/cytology(-)
102.127	8.78	1	0.361702	5.125	1	MRI(+)/cytology(+)<MRI(-)/cytology(-)
102.128	20.27	1	0.361702	5.14	1	MRI(+)/cytology(+)<MRI(-)/cytology(-)
102.129	9.79	1	0.361702	5.195	1	MRI(+)/cytology(+)<MRI(-)/cytology(-)
120.08	7.81	1	0.361702	3.5	1	MRI(+)/cytology(+)>MRI(-)/cytology(-)
120.969	23.48	1	0.361702	5.32	1	MRI(+)/cytology(+)>MRI(-)/cytology(-)
123.079	18.83	1	0.361702	5.02	1	MRI(+)/cytology(+)>MRI(-)/cytology(-)
123.08	8.88	1	0.361702	3.67	1	MRI(+)/cytology(+)>MRI(-)/cytology(-)
123.098	22.41	1	0.361702	4.42	1	MRI(+)/cytology(+)>MRI(-)/cytology(-)
124.087	17.46	1	0.361702	5.07	1	MRI(+)/cytology(+)>MRI(-)/cytology(-)
124.087	17.21	1	0.361702	5.13	1	MRI(+)/cytology(+)>MRI(-)/cytology(-)
124.963	20.46	1	0.361702	4.495	1	MRI(+)/cytology(+)<MRI(-)/cytology(-)
132.954	23.4	1	0.361702	4.265	1	MRI(+)/cytology(+)>MRI(-)/cytology(-)
138.09	8.66	1	0.361702	2.75	1	MRI(+)/cytology(+)>MRI(-)/cytology(-)
138.092	22.64	1	0.361702	4.21	1	MRI(+)/cytology(+)>MRI(-)/cytology(-)
139.989	23.06	1	0.361702	5.31	1	MRI(+)/cytology(+)>MRI(-)/cytology(-)
140.066	2.06	1	0.361702	4.7	1	MRI(+)/cytology(+)>MRI(-)/cytology(-)
140.917	23	1	0.361702	4.62	1	MRI(+)/cytology(+)<MRI(-)/cytology(-)
141.958	23.45	1	0.361702	6.28	1	MRI(+)/cytology(+)>MRI(-)/cytology(-)
166.086	8.96	1	0.361702	3.36	1	MRI(+)/cytology(+)>MRI(-)/cytology(-)
204.895	23.02	1	0.361702	4.38	1	MRI(+)/cytology(+)>MRI(-)/cytology(-)
217.105	7.96	1	0.361702	4.925	1	MRI(+)/cytology(+)<MRI(-)/cytology(-)
223.99	22.87	1	0.361702	4.2	1	MRI(+)/cytology(+)>MRI(-)/cytology(-)
226.949	18.42	1	0.361702	4.145	1	MRI(+)/cytology(+)<MRI(-)/cytology(-)
227.956	1.64	1	0.361702	4.89	1	MRI(+)/cytology(+)<MRI(-)/cytology(-)
250.177	11.67	1	0.361702	4.33	1	MRI(+)/cytology(+)<MRI(-)/cytology(-)
255.944	23	1	0.361702	4.58	1	MRI(+)/cytology(+)<MRI(-)/cytology(-)
261.13	8.51	1	0.361702	4.325	1	MRI(+)/cytology(+)>MRI(-)/cytology(-)
261.131	22.77	1	0.361702	5.425	1	MRI(+)/cytology(+)<MRI(-)/cytology(-)
262.132	8.64	1	0.361702	3.175	1	MRI(+)/cytology(+)>MRI(-)/cytology(-)
274.274	9.97	1	0.361702	5.45	1	MRI(+)/cytology(+)<MRI(-)/cytology(-)
284.207	7.81	1	0.361702	2.92	1	MRI(+)/cytology(+)>MRI(-)/cytology(-)
291.146	7.88	1	0.361702	2.73	1	MRI(+)/cytology(+)>MRI(-)/cytology(-)
305.157	20.38	1	0.361702	5.345	1	MRI(+)/cytology(+)<MRI(-)/cytology(-)
305.158	19.6	1	0.361702	5.16	1	MRI(+)/cytology(+)<MRI(-)/cytology(-)
306.16	8.49	1	0.361702	3.135	1	MRI(+)/cytology(+)>MRI(-)/cytology(-)
318.168	8.46	1	0.361702	2.7	1	MRI(+)/cytology(+)>MRI(-)/cytology(-)
328.232	7.82	1	0.361702	2.55	1	MRI(+)/cytology(+)>MRI(-)/cytology(-)
329.241	19.08	1	0.361702	3.99	1	MRI(+)/cytology(+)>MRI(-)/cytology(-)
345.232	8.27	1	0.361702	4.3	1	MRI(+)/cytology(+)<MRI(-)/cytology(-)
360.321	19.69	1	0.361702	3.13	1	MRI(+)/cytology(+)>MRI(-)/cytology(-)
364.846	22.94	1	0.361702	4.68	1	MRI(+)/cytology(+)>MRI(-)/cytology(-)
365.177	7.82	1	0.361702	2.935	1	MRI(+)/cytology(+)>MRI(-)/cytology(-)
397.23	19.05	1	0.361702	3.68	1	MRI(+)/cytology(+)>MRI(-)/cytology(-)
397.232	19.15	1	0.361702	3.8	1	MRI(+)/cytology(+)>MRI(-)/cytology(-)
419.277	15.26	1	0.361702	4.905	1	MRI(+)/cytology(+)>MRI(-)/cytology(-)
430.914	18.34	1	0.361702	3.695	1	MRI(+)/cytology(+)<MRI(-)/cytology(-)
481.262	20.19	1	0.361702	4.81	1	MRI(+)/cytology(+)<MRI(-)/cytology(-)
489.813	22.92	1	0.361702	4.16	1	MRI(+)/cytology(+)>MRI(-)/cytology(-)
492.799	22.99	1	0.361702	5.11	1	MRI(+)/cytology(+)>MRI(-)/cytology(-)
492.806	23.01	1	0.361702	5.04	1	MRI(+)/cytology(+)<MRI(-)/cytology(-)
512.505	14.22	1	0.361702	4.255	1	MRI(+)/cytology(+)>MRI(-)/cytology(-)
514.774	23.06	1	0.361702	3.925	1	MRI(+)/cytology(+)<MRI(-)/cytology(-)
571.324	9.95	1	0.361702	2.56	1	MRI(+)/cytology(+)>MRI(-)/cytology(-)
585.31	9.16	1	0.361702	3.035	1	MRI(+)/cytology(+)<MRI(-)/cytology(-)
592.38	8.56	1	0.361702	4.835	0	MRI(+)/cytology(+)<MRI(-)/cytology(-)
609.385	8.76	1	0.361702	3.2	1	MRI(+)/cytology(+)>MRI(-)/cytology(-)
609.387	9.28	1	0.361702	3.11	1	MRI(+)/cytology(+)<MRI(-)/cytology(-)
610.39	8.65	1	0.361702	4.89	1	MRI(+)/cytology(+)<MRI(-)/cytology(-)
624.765	22.97	1	0.361702	4.275	1	MRI(+)/cytology(+)>MRI(-)/cytology(-)
628.197	18.87	1	0.361702	3.93	1	MRI(+)/cytology(+)<MRI(-)/cytology(-)
629.329	8.6	1	0.361702	4.405	1	MRI(+)/cytology(+)<MRI(-)/cytology(-)
638.425	9.03	1	0.361702	1.29	0	MRI(+)/cytology(+)>MRI(-)/cytology(-)
659.367	9.1	1	0.361702	1.95	0	MRI(+)/cytology(+)>MRI(-)/cytology(-)
676.858	1.61	1	0.361702	4.91	1	MRI(+)/cytology(+)<MRI(-)/cytology(-)
702.395	8.55	1	0.361702	2.98	1	MRI(+)/cytology(+)>MRI(-)/cytology(-)
804.843	1.71	1	0.361702	5.58	1	MRI(+)/cytology(+)>MRI(-)/cytology(-)
804.844	1.64	1	0.361702	5.555	1	MRI(+)/cytology(+)>MRI(-)/cytology(-)
805.846	1.63	1	0.361702	4.8	1	MRI(+)/cytology(+)>MRI(-)/cytology(-)
873.33	1.58	1	0.361702	4.695	1	MRI(+)/cytology(+)>MRI(-)/cytology(-)
879.74	20.01	1	0.361702	3.685	1	MRI(+)/cytology(+)<MRI(-)/cytology(-)
975.304	1.64	1	0.361702	4.99	1	MRI(+)/cytology(+)>MRI(-)/cytology(-)
982.796	1.67	1	0.361702	4.98	1	MRI(+)/cytology(+)<MRI(-)/cytology(-)
1110.79	1.66	1	0.361702	5.63	1	MRI(+)/cytology(+)>MRI(-)/cytology(-)
1179.77	1.66	1	0.361702	4.82	1	MRI(+)/cytology(+)>MRI(-)/cytology(-)
122.097	21.85	0.375	0.978723	5.245	1	MRI(+)/cytology(+)>MRI(-)/cytology(-)
144.175	8.47	0.375	0.978723	2	0	MRI(+)/cytology(+)<MRI(-)/cytology(-)
226.951	19.85	0.375	0.978723	4.815	1	MRI(+)/cytology(+)>MRI(-)/cytology(-)
255.067	8.07	0.375	0.978723	2.855	1	MRI(+)/cytology(+)>MRI(-)/cytology(-)
285.011	9.68	0.375	0.978723	3.035	1	MRI(+)/cytology(+)>MRI(-)/cytology(-)
426.177	8.45	0.375	0.978723	3.175	0	MRI(+)/cytology(+)>MRI(-)/cytology(-)
492.269	9.7	0.375	0.978723	3.44	1	MRI(+)/cytology(+)>MRI(-)/cytology(-)
498.901	21.27	0.375	0.978723	0.82	0	MRI(+)/cytology(+)<MRI(-)/cytology(-)
498.901	21.33	0.375	0.978723	0.955	0	MRI(+)/cytology(+)<MRI(-)/cytology(-)
653.414	9.48	0.375	0.978723	1.97	0	MRI(+)/cytology(+)<MRI(-)/cytology(-)
942.942	8.24	0.375	0.978723	3.73	1	MRI(+)/cytology(+)>MRI(-)/cytology(-)
59.0513	24.17	0.5	0.851064	5.51	1	MRI(+)/cytology(+)>MRI(-)/cytology(-)
59.0516	9.01	0.5	0.851064	5.115	1	MRI(+)/cytology(+)>MRI(-)/cytology(-)
59.0524	9.47	0.5	0.851064	5.4	1	MRI(+)/cytology(+)>MRI(-)/cytology(-)
71.93	23.69	0.5	0.851064	4.88	1	MRI(+)/cytology(+)>MRI(-)/cytology(-)
91.0545	21.69	0.5	0.851064	5.42	1	MRI(+)/cytology(+)>MRI(-)/cytology(-)
102.091	18.38	0.5	0.851064	4.195	1	MRI(+)/cytology(+)<MRI(-)/cytology(-)
102.129	24.23	0.5	0.851064	4.68	1	MRI(+)/cytology(+)<MRI(-)/cytology(-)
106.077	20.73	0.5	0.851064	5.22	1	MRI(+)/cytology(+)>MRI(-)/cytology(-)
110.059	8.38	0.5	0.851064	3.09	0	MRI(+)/cytology(+)>MRI(-)/cytology(-)
110.071	19.86	0.5	0.851064	4.28	1	MRI(+)/cytology(+)>MRI(-)/cytology(-)
122.097	20.53	0.5	0.851064	4.905	1	MRI(+)/cytology(+)>MRI(-)/cytology(-)
166.083	2.36	0.5	0.851064	3.4	1	MRI(+)/cytology(+)<MRI(-)/cytology(-)
173.077	19.23	0.5	0.851064	5.1	1	MRI(+)/cytology(+)>MRI(-)/cytology(-)
173.08	18.73	0.5	0.851064	5.085	1	MRI(+)/cytology(+)>MRI(-)/cytology(-)
181.073	7.75	0.5	0.851064	3.64	1	MRI(+)/cytology(+)>MRI(-)/cytology(-)
200.238	10.11	0.5	0.851064	4.13	1	MRI(+)/cytology(+)<MRI(-)/cytology(-)
214.251	19.17	0.5	0.851064	4.215	1	MRI(+)/cytology(+)>MRI(-)/cytology(-)
214.253	20.55	0.5	0.851064	3.24	1	MRI(+)/cytology(+)<MRI(-)/cytology(-)
215.125	9.15	0.5	0.851064	3.88	1	MRI(+)/cytology(+)>MRI(-)/cytology(-)
219.211	9.84	0.5	0.851064	2.53	1	MRI(+)/cytology(+)>MRI(-)/cytology(-)
226.951	21.14	0.5	0.851064	2.25	1	MRI(+)/cytology(+)<MRI(-)/cytology(-)
231.253	10.25	0.5	0.851064	3.81	1	MRI(+)/cytology(+)<MRI(-)/cytology(-)
233.1	7.42	0.5	0.851064	3.405	1	MRI(+)/cytology(+)>MRI(-)/cytology(-)
235.13	11.09	0.5	0.851064	4.515	1	MRI(+)/cytology(+)<MRI(-)/cytology(-)
239.15	8.77	0.5	0.851064	4.23	1	MRI(+)/cytology(+)>MRI(-)/cytology(-)
242.924	1.68	0.5	0.851064	4.97	1	MRI(+)/cytology(+)>MRI(-)/cytology(-)
247.167	19.91	0.5	0.851064	4.39	1	MRI(+)/cytology(+)>MRI(-)/cytology(-)
273.167	9.36	0.5	0.851064	4.39	1	MRI(+)/cytology(+)<MRI(-)/cytology(-)
291.272	9.88	0.5	0.851064	4.58	1	MRI(+)/cytology(+)>MRI(-)/cytology(-)
293.145	8.4	0.5	0.851064	4.215	1	MRI(+)/cytology(+)>MRI(-)/cytology(-)
305.157	19.31	0.5	0.851064	5.7	1	MRI(+)/cytology(+)>MRI(-)/cytology(-)
330.336	11.03	0.5	0.851064	4.9	1	MRI(+)/cytology(+)>MRI(-)/cytology(-)
349.185	19.1	0.5	0.851064	5.525	1	MRI(+)/cytology(+)>MRI(-)/cytology(-)
376.26	12.58	0.5	0.851064	4.82	1	MRI(+)/cytology(+)<MRI(-)/cytology(-)
409.207	8.51	0.5	0.851064	4.095	1	MRI(+)/cytology(+)<MRI(-)/cytology(-)
413.266	19.81	0.5	0.851064	4.98	1	MRI(+)/cytology(+)>MRI(-)/cytology(-)
415.252	8.65	0.5	0.851064	4.31	1	MRI(+)/cytology(+)<MRI(-)/cytology(-)
431.173	8.29	0.5	0.851064	2.005	0	MRI(+)/cytology(+)<MRI(-)/cytology(-)
437.235	8.65	0.5	0.851064	4.81	1	MRI(+)/cytology(+)<MRI(-)/cytology(-)
450.323	12.63	0.5	0.851064	3.085	1	MRI(+)/cytology(+)<MRI(-)/cytology(-)
476.305	8.2	0.5	0.851064	6.45	1	MRI(+)/cytology(+)>MRI(-)/cytology(-)
484.276	8.91	0.5	0.851064	2.685	1	MRI(+)/cytology(+)>MRI(-)/cytology(-)
497.231	8.63	0.5	0.851064	2.475	1	MRI(+)/cytology(+)<MRI(-)/cytology(-)
503.303	8.36	0.5	0.851064	6.15	1	MRI(+)/cytology(+)>MRI(-)/cytology(-)
520.333	8.66	0.5	0.851064	4.85	1	MRI(+)/cytology(+)<MRI(-)/cytology(-)
521.335	8.6	0.5	0.851064	4.305	1	MRI(+)/cytology(+)<MRI(-)/cytology(-)
521.336	8.45	0.5	0.851064	5.895	1	MRI(+)/cytology(+)>MRI(-)/cytology(-)
525.289	8.76	0.5	0.851064	4.89	1	MRI(+)/cytology(+)<MRI(-)/cytology(-)
528.291	8.27	0.5	0.851064	3.7	1	MRI(+)/cytology(+)>MRI(-)/cytology(-)
560.867	1.52	0.5	0.851064	4.85	1	MRI(+)/cytology(+)>MRI(-)/cytology(-)
566.363	8.41	0.5	0.851064	4.82	0	MRI(+)/cytology(+)>MRI(-)/cytology(-)
570.32	8.43	0.5	0.851064	5.76	1	MRI(+)/cytology(+)>MRI(-)/cytology(-)
570.321	9.24	0.5	0.851064	3.42	1	MRI(+)/cytology(+)<MRI(-)/cytology(-)
571.312	8.37	0.5	0.851064	5.14	1	MRI(+)/cytology(+)>MRI(-)/cytology(-)
585.271	19.54	0.5	0.851064	3.61	1	MRI(+)/cytology(+)>MRI(-)/cytology(-)
610.389	8.43	0.5	0.851064	3.95	0	MRI(+)/cytology(+)>MRI(-)/cytology(-)
611.398	8.43	0.5	0.851064	3.805	0	MRI(+)/cytology(+)>MRI(-)/cytology(-)
613.338	8.46	0.5	0.851064	5.065	1	MRI(+)/cytology(+)>MRI(-)/cytology(-)
614.341	9.06	0.5	0.851064	2.96	1	MRI(+)/cytology(+)<MRI(-)/cytology(-)
614.345	8.5	0.5	0.851064	5.4	1	MRI(+)/cytology(+)>MRI(-)/cytology(-)
614.348	8.54	0.5	0.851064	5.66	1	MRI(+)/cytology(+)>MRI(-)/cytology(-)
615.342	8.43	0.5	0.851064	2.16	0	MRI(+)/cytology(+)<MRI(-)/cytology(-)
638.425	8.48	0.5	0.851064	4.2	0	MRI(+)/cytology(+)>MRI(-)/cytology(-)
652.408	9.48	0.5	0.851064	3.2	1	MRI(+)/cytology(+)<MRI(-)/cytology(-)
657.365	8.56	0.5	0.851064	5.635	1	MRI(+)/cytology(+)>MRI(-)/cytology(-)
657.366	8.52	0.5	0.851064	4.725	1	MRI(+)/cytology(+)>MRI(-)/cytology(-)
658.367	8.87	0.5	0.851064	2.81	1	MRI(+)/cytology(+)<MRI(-)/cytology(-)
659.367	8.56	0.5	0.851064	4.4	1	MRI(+)/cytology(+)>MRI(-)/cytology(-)
680.437	8.48	0.5	0.851064	4.72	1	MRI(+)/cytology(+)>MRI(-)/cytology(-)
702.86	18.55	0.5	0.851064	4.01	0	MRI(+)/cytology(+)>MRI(-)/cytology(-)
853.722	20.52	0.5	0.851064	4.71	0	MRI(+)/cytology(+)>MRI(-)/cytology(-)
853.727	19.13	0.5	0.851064	4.86	1	MRI(+)/cytology(+)>MRI(-)/cytology(-)
854.724	20.52	0.5	0.851064	4.48	0	MRI(+)/cytology(+)>MRI(-)/cytology(-)
942.938	8.01	0.5	0.851064	3.18	0	MRI(+)/cytology(+)>MRI(-)/cytology(-)
59.0518	21.12	0.625	0.723404	5.37	1	MRI(+)/cytology(+)>MRI(-)/cytology(-)
59.0518	20.16	0.625	0.723404	5.79	1	MRI(+)/cytology(+)>MRI(-)/cytology(-)
91.0545	21.49	0.625	0.723404	4.98	1	MRI(+)/cytology(+)>MRI(-)/cytology(-)
102.09	17.03	0.625	0.723404	3.925	1	MRI(+)/cytology(+)<MRI(-)/cytology(-)
102.091	19.18	0.625	0.723404	4.33	1	MRI(+)/cytology(+)<MRI(-)/cytology(-)
102.127	16.76	0.625	0.723404	4.48	1	MRI(+)/cytology(+)<MRI(-)/cytology(-)
102.128	20.89	0.625	0.723404	5.34	1	MRI(+)/cytology(+)<MRI(-)/cytology(-)
120.081	8.52	0.625	0.723404	3.15	1	MRI(+)/cytology(+)>MRI(-)/cytology(-)
123.08	20.51	0.625	0.723404	4.38	1	MRI(+)/cytology(+)>MRI(-)/cytology(-)
123.1	19.94	0.625	0.723404	4.58	1	MRI(+)/cytology(+)>MRI(-)/cytology(-)
124.087	14.59	0.625	0.723404	4.635	1	MRI(+)/cytology(+)<MRI(-)/cytology(-)
125.703	8	0.625	0.723404	1.4	0	MRI(+)/cytology(+)>MRI(-)/cytology(-)
127.095	8.44	0.625	0.723404	3.58	1	MRI(+)/cytology(+)>MRI(-)/cytology(-)
154.058	2.02	0.625	0.723404	4.42	1	MRI(+)/cytology(+)>MRI(-)/cytology(-)
165.114	16.78	0.625	0.723404	4.8	1	MRI(+)/cytology(+)>MRI(-)/cytology(-)
166.086	8.3	0.625	0.723404	3.595	1	MRI(+)/cytology(+)>MRI(-)/cytology(-)
166.086	7.47	0.625	0.723404	3.5	1	MRI(+)/cytology(+)>MRI(-)/cytology(-)
173.078	8.3	0.625	0.723404	3.84	1	MRI(+)/cytology(+)>MRI(-)/cytology(-)
173.079	21.34	0.625	0.723404	4.305	1	MRI(+)/cytology(+)<MRI(-)/cytology(-)
194.098	8	0.625	0.723404	3.44	1	MRI(+)/cytology(+)>MRI(-)/cytology(-)
201.052	2.05	0.625	0.723404	4.25	1	MRI(+)/cytology(+)>MRI(-)/cytology(-)
213.112	20.14	0.625	0.723404	4.375	1	MRI(+)/cytology(+)>MRI(-)/cytology(-)
213.147	11.11	0.625	0.723404	4.63	1	MRI(+)/cytology(+)>MRI(-)/cytology(-)
215.127	20.08	0.625	0.723404	4.445	1	MRI(+)/cytology(+)>MRI(-)/cytology(-)
215.92	22.93	0.625	0.723404	5.16	1	MRI(+)/cytology(+)>MRI(-)/cytology(-)
217.104	16.06	0.625	0.723404	5.25	1	MRI(+)/cytology(+)>MRI(-)/cytology(-)
217.105	20.04	0.625	0.723404	5.73	1	MRI(+)/cytology(+)>MRI(-)/cytology(-)
226.951	22.41	0.625	0.723404	5.295	1	MRI(+)/cytology(+)>MRI(-)/cytology(-)
226.951	22.47	0.625	0.723404	5.29	1	MRI(+)/cytology(+)>MRI(-)/cytology(-)
226.952	21.01	0.625	0.723404	2.4	1	MRI(+)/cytology(+)<MRI(-)/cytology(-)
238.097	7.9	0.625	0.723404	2.8	1	MRI(+)/cytology(+)<MRI(-)/cytology(-)
239.148	20.27	0.625	0.723404	5.005	1	MRI(+)/cytology(+)>MRI(-)/cytology(-)
239.149	16.78	0.625	0.723404	5.195	1	MRI(+)/cytology(+)>MRI(-)/cytology(-)
241.178	10.82	0.625	0.723404	3.75	1	MRI(+)/cytology(+)<MRI(-)/cytology(-)
245.096	2.36	0.625	0.723404	3.33	1	MRI(+)/cytology(+)>MRI(-)/cytology(-)
247.166	22.27	0.625	0.723404	4.765	1	MRI(+)/cytology(+)>MRI(-)/cytology(-)
247.246	9.3	0.625	0.723404	3.65	1	MRI(+)/cytology(+)<MRI(-)/cytology(-)
247.247	10.12	0.625	0.723404	3.21	1	MRI(+)/cytology(+)>MRI(-)/cytology(-)
258.852	23.58	0.625	0.723404	5.13	1	MRI(+)/cytology(+)>MRI(-)/cytology(-)
261.132	22.04	0.625	0.723404	5.74	1	MRI(+)/cytology(+)>MRI(-)/cytology(-)
262.143	14.41	0.625	0.723404	4.755	1	MRI(+)/cytology(+)<MRI(-)/cytology(-)
278.183	14.66	0.625	0.723404	3.86	1	MRI(+)/cytology(+)<MRI(-)/cytology(-)
283.175	18.19	0.625	0.723404	5.15	1	MRI(+)/cytology(+)>MRI(-)/cytology(-)
284.208	8.96	0.625	0.723404	3.445	1	MRI(+)/cytology(+)<MRI(-)/cytology(-)
289.1	8.81	0.625	0.723404	2.74	1	MRI(+)/cytology(+)>MRI(-)/cytology(-)
296.069	9.68	0.625	0.723404	2.65	1	MRI(+)/cytology(+)>MRI(-)/cytology(-)
303.311	10.87	0.625	0.723404	3.24	1	MRI(+)/cytology(+)<MRI(-)/cytology(-)
305.159	18.58	0.625	0.723404	5.635	1	MRI(+)/cytology(+)>MRI(-)/cytology(-)
307.176	8.59	0.625	0.723404	3.87	1	MRI(+)/cytology(+)<MRI(-)/cytology(-)
318.302	10.52	0.625	0.723404	4.32	1	MRI(+)/cytology(+)>MRI(-)/cytology(-)
327.199	8.15	0.625	0.723404	4.705	1	MRI(+)/cytology(+)<MRI(-)/cytology(-)
328.227	8.28	0.625	0.723404	3.86	1	MRI(+)/cytology(+)<MRI(-)/cytology(-)
334.854	23.03	0.625	0.723404	4.135	1	MRI(+)/cytology(+)<MRI(-)/cytology(-)
337.232	17.64	0.625	0.723404	5.32	1	MRI(+)/cytology(+)>MRI(-)/cytology(-)
339.346	20.01	0.625	0.723404	4.94	1	MRI(+)/cytology(+)>MRI(-)/cytology(-)
347.17	8.4	0.625	0.723404	3.45	1	MRI(+)/cytology(+)<MRI(-)/cytology(-)
[truncated: 4,627 more rows]

## Sheet: Supplementary Table 2B
row no.	mass value (m/z)	retention time (min)	sensitivity	specificity	threshold	zero flag	overall pattern
1268	129.055	2.09	0.95	0.744681	4.22	1	MRI(+)/cytology(-)>MRI(-)/cytology(-)
895	118.086	2.14	1	0.680851	4.63	1	MRI(+)/cytology(-)>MRI(-)/cytology(-)
3126	285.204	11.11	0.95	0.723404	4.11	1	MRI(+)/cytology(-)<MRI(-)/cytology(-)
893	118.086	2.1	0.95	0.680851	4.585	1	MRI(+)/cytology(-)>MRI(-)/cytology(-)
2615	241.031	1.93	0.95	0.680851	3.51	1	MRI(+)/cytology(-)>MRI(-)/cytology(-)
1256	127.094	8.98	0.85	0.765957	2.88	1	MRI(+)/cytology(-)>MRI(-)/cytology(-)
3125	285.202	11.08	0.9	0.702128	4.31	1	MRI(+)/cytology(-)<MRI(-)/cytology(-)
3226	298.086	9.7	0.9	0.702128	2.985	1	MRI(+)/cytology(-)<MRI(-)/cytology(-)
2911	262.238	9.21	0.75	0.851064	3.075	1	MRI(+)/cytology(-)<MRI(-)/cytology(-)
441	90.5082	23.04	1	0.595745	3.995	1	MRI(+)/cytology(-)>MRI(-)/cytology(-)
4849	478.308	8.75	0.85	0.744681	3.17	1	MRI(+)/cytology(-)<MRI(-)/cytology(-)
1720	172.169	12.2	0.9	0.680851	4.29	1	MRI(+)/cytology(-)<MRI(-)/cytology(-)
4771	461.316	8.68	0.75	0.829787	3.52	1	MRI(+)/cytology(-)<MRI(-)/cytology(-)
2046	203.151	1.81	0.8	0.765957	3.98	1	MRI(+)/cytology(-)>MRI(-)/cytology(-)
777	104.106	1.7	0.9	0.659574	4.42	1	MRI(+)/cytology(-)>MRI(-)/cytology(-)
1540	158.153	11.92	0.9	0.659574	5.38	1	MRI(+)/cytology(-)<MRI(-)/cytology(-)
3191	295.227	11.39	0.9	0.659574	4.87	1	MRI(+)/cytology(-)<MRI(-)/cytology(-)
2016	200.237	9.87	0.75	0.808511	4.495	1	MRI(+)/cytology(-)>MRI(-)/cytology(-)
2329	223.062	11.78	0.75	0.808511	4.04	1	MRI(+)/cytology(-)<MRI(-)/cytology(-)
227	69.9953	23.11	1	0.553191	4.94	1	MRI(+)/cytology(-)>MRI(-)/cytology(-)
266	75.9462	23.01	1	0.553191	4.9	1	MRI(+)/cytology(-)>MRI(-)/cytology(-)
270	77.9424	23.04	1	0.553191	4.44	1	MRI(+)/cytology(-)>MRI(-)/cytology(-)
352	82.9977	23.7	1	0.553191	4.85	1	MRI(+)/cytology(-)>MRI(-)/cytology(-)
892	118.086	2.33	0.85	0.702128	4.21	1	MRI(+)/cytology(-)>MRI(-)/cytology(-)
2621	241.178	11.19	0.85	0.702128	3.54	1	MRI(+)/cytology(-)<MRI(-)/cytology(-)
2988	276.277	9.74	0.85	0.702128	4.41	1	MRI(+)/cytology(-)<MRI(-)/cytology(-)
355	83.9984	22.98	0.95	0.595745	4.97	1	MRI(+)/cytology(-)>MRI(-)/cytology(-)
1680	167.07	13.16	0.8	0.744681	4.275	1	MRI(+)/cytology(-)<MRI(-)/cytology(-)
2907	262.143	12.18	0.8	0.744681	4.37	1	MRI(+)/cytology(-)<MRI(-)/cytology(-)
5145	505.346	9.87	0.8	0.744681	2.99	1	MRI(+)/cytology(-)<MRI(-)/cytology(-)
3421	315.154	8.83	0.65	0.893617	2.97	1	MRI(+)/cytology(-)<MRI(-)/cytology(-)
231	70.994	23.01	0.9	0.638298	4.45	1	MRI(+)/cytology(-)>MRI(-)/cytology(-)
1265	128.95	23.69	0.9	0.638298	4.75	1	MRI(+)/cytology(-)>MRI(-)/cytology(-)
1987	195.137	11.07	0.9	0.638298	4.54	1	MRI(+)/cytology(-)<MRI(-)/cytology(-)
2039	202.217	9.18	0.75	0.787234	3.82	1	MRI(+)/cytology(-)<MRI(-)/cytology(-)
2051	203.221	9.15	0.75	0.787234	3.05	1	MRI(+)/cytology(-)<MRI(-)/cytology(-)
2454	230.212	9.58	0.75	0.787234	2.985	1	MRI(+)/cytology(-)>MRI(-)/cytology(-)
2978	275.277	9.61	0.75	0.787234	5.45	1	MRI(+)/cytology(-)>MRI(-)/cytology(-)
3049	283.012	9.68	0.75	0.787234	3.04	1	MRI(+)/cytology(-)<MRI(-)/cytology(-)
3214	296.256	9.66	0.75	0.787234	3.905	1	MRI(+)/cytology(-)>MRI(-)/cytology(-)
3634	339.249	13.42	0.75	0.787234	4.52	1	MRI(+)/cytology(-)<MRI(-)/cytology(-)
4911	481.263	9.88	0.75	0.787234	4.58	1	MRI(+)/cytology(-)<MRI(-)/cytology(-)
5612	571.315	9.02	0.75	0.787234	2.96	1	MRI(+)/cytology(-)<MRI(-)/cytology(-)
207	68.995	23.67	1	0.531915	4.55	1	MRI(+)/cytology(-)>MRI(-)/cytology(-)
218	68.9959	23.64	1	0.531915	4.71	1	MRI(+)/cytology(-)>MRI(-)/cytology(-)
228	70.067	2.29	1	0.531915	3.63	1	MRI(+)/cytology(-)>MRI(-)/cytology(-)
1602	161.095	14.44	0.85	0.680851	4.34	1	MRI(+)/cytology(-)<MRI(-)/cytology(-)
1933	193.094	8.45	0.85	0.680851	3.56	1	MRI(+)/cytology(-)>MRI(-)/cytology(-)
2049	203.218	9.31	0.85	0.680851	2.74	0	MRI(+)/cytology(-)<MRI(-)/cytology(-)
2490	233.1	7.42	0.85	0.680851	3.34	1	MRI(+)/cytology(-)>MRI(-)/cytology(-)
2498	235.13	11.09	0.85	0.680851	4.69	1	MRI(+)/cytology(-)<MRI(-)/cytology(-)
2725	255.062	9.63	0.85	0.680851	3.21	1	MRI(+)/cytology(-)<MRI(-)/cytology(-)
3215	296.257	9.75	0.85	0.680851	4.03	1	MRI(+)/cytology(-)<MRI(-)/cytology(-)
1601	161.095	12.24	0.7	0.829787	3.84	1	MRI(+)/cytology(-)<MRI(-)/cytology(-)
4	53.006	0.16	0.95	0.574468	5.28	1	MRI(+)/cytology(-)>MRI(-)/cytology(-)
208	68.995	23.72	0.95	0.574468	5.3	1	MRI(+)/cytology(-)>MRI(-)/cytology(-)
265	74.9382	23.08	0.95	0.574468	4.69	1	MRI(+)/cytology(-)>MRI(-)/cytology(-)
347	82.9975	23.41	0.95	0.574468	5.19	1	MRI(+)/cytology(-)>MRI(-)/cytology(-)
348	82.9976	23.72	0.95	0.574468	4.905	1	MRI(+)/cytology(-)>MRI(-)/cytology(-)
425	87.9369	23.06	0.95	0.574468	4.8	1	MRI(+)/cytology(-)>MRI(-)/cytology(-)
1427	140.066	2.06	0.95	0.574468	4.79	1	MRI(+)/cytology(-)>MRI(-)/cytology(-)
3584	331.25	11.53	0.95	0.574468	4.81	1	MRI(+)/cytology(-)<MRI(-)/cytology(-)
4735	460.279	9.88	0.95	0.574468	4.055	1	MRI(+)/cytology(-)<MRI(-)/cytology(-)
1464	144.174	9.02	0.8	0.723404	2.09	1	MRI(+)/cytology(-)<MRI(-)/cytology(-)
1931	193.094	8.56	0.8	0.723404	3.29	1	MRI(+)/cytology(-)>MRI(-)/cytology(-)
2667	247.246	9.3	0.8	0.723404	3.645	1	MRI(+)/cytology(-)<MRI(-)/cytology(-)
3148	290.268	9.99	0.8	0.723404	4.17	1	MRI(+)/cytology(-)<MRI(-)/cytology(-)
3559	329.23	12.7	0.8	0.723404	4.45	1	MRI(+)/cytology(-)<MRI(-)/cytology(-)
5713	593.39	9.01	0.8	0.723404	2.94	1	MRI(+)/cytology(-)<MRI(-)/cytology(-)
1272	130.05	1.92	0.65	0.87234	5.92	1	MRI(+)/cytology(-)>MRI(-)/cytology(-)
4151	390.264	8.64	0.65	0.87234	2.535	0	MRI(+)/cytology(-)<MRI(-)/cytology(-)
204	68.9949	23.65	0.9	0.617021	5.38	1	MRI(+)/cytology(-)>MRI(-)/cytology(-)
209	68.995	23.43	0.9	0.617021	5.585	1	MRI(+)/cytology(-)>MRI(-)/cytology(-)
220	68.996	23.63	0.9	0.617021	4.995	1	MRI(+)/cytology(-)>MRI(-)/cytology(-)
1266	128.961	22.99	0.9	0.617021	4.93	1	MRI(+)/cytology(-)>MRI(-)/cytology(-)
3504	327.047	1.61	0.9	0.617021	4.18	1	MRI(+)/cytology(-)>MRI(-)/cytology(-)
3505	327.055	1.57	0.9	0.617021	4.15	1	MRI(+)/cytology(-)>MRI(-)/cytology(-)
2472	231.249	9.98	0.75	0.765957	4.005	0	MRI(+)/cytology(-)<MRI(-)/cytology(-)
2474	231.251	9.82	0.75	0.765957	4.4	0	MRI(+)/cytology(-)<MRI(-)/cytology(-)
3134	285.288	9.97	0.75	0.765957	3.435	1	MRI(+)/cytology(-)<MRI(-)/cytology(-)
4738	460.284	9.32	0.75	0.765957	4.05	1	MRI(+)/cytology(-)<MRI(-)/cytology(-)
4765	461.312	8.73	0.75	0.765957	3.48	1	MRI(+)/cytology(-)<MRI(-)/cytology(-)
4561	433.287	8.58	0.6	0.914894	4.005	1	MRI(+)/cytology(-)<MRI(-)/cytology(-)
413	85.9417	23.03	1	0.510638	5.345	1	MRI(+)/cytology(-)>MRI(-)/cytology(-)
889	116.971	22.99	1	0.510638	4.75	1	MRI(+)/cytology(-)>MRI(-)/cytology(-)
1598	161.013	23	1	0.510638	4.37	1	MRI(+)/cytology(-)<MRI(-)/cytology(-)
346	82.9975	23.65	0.85	0.659574	4.92	1	MRI(+)/cytology(-)>MRI(-)/cytology(-)
1831	181.121	11.8	0.85	0.659574	4.7	1	MRI(+)/cytology(-)<MRI(-)/cytology(-)
3548	328.896	22.95	0.85	0.659574	4.76	1	MRI(+)/cytology(-)<MRI(-)/cytology(-)
1691	169.058	1.88	0.7	0.808511	4.91	1	MRI(+)/cytology(-)>MRI(-)/cytology(-)
2456	230.248	9.64	0.7	0.808511	4.75	1	MRI(+)/cytology(-)>MRI(-)/cytology(-)
2756	258.28	10.44	0.7	0.808511	5.03	1	MRI(+)/cytology(-)>MRI(-)/cytology(-)
2990	276.279	9.97	0.7	0.808511	3.725	1	MRI(+)/cytology(-)<MRI(-)/cytology(-)
5497	565.36	9.02	0.7	0.808511	3.61	1	MRI(+)/cytology(-)<MRI(-)/cytology(-)
5698	592.387	9.01	0.7	0.808511	3.68	1	MRI(+)/cytology(-)<MRI(-)/cytology(-)
5708	593.388	9.41	0.7	0.808511	2.41	1	MRI(+)/cytology(-)<MRI(-)/cytology(-)
203	68.9949	23.68	0.95	0.553191	5.1	1	MRI(+)/cytology(-)>MRI(-)/cytology(-)
494	97.029	2.08	0.95	0.553191	4.7	1	MRI(+)/cytology(-)>MRI(-)/cytology(-)
511	98.9614	23.05	0.95	0.553191	5.74	1	MRI(+)/cytology(-)>MRI(-)/cytology(-)
529	100.931	23.47	0.95	0.553191	5.09	1	MRI(+)/cytology(-)>MRI(-)/cytology(-)
1941	194.078	8.65	0.8	0.702128	2.855	1	MRI(+)/cytology(-)>MRI(-)/cytology(-)
2018	200.238	10.11	0.8	0.702128	4.285	1	MRI(+)/cytology(-)<MRI(-)/cytology(-)
2124	214.254	10.22	0.8	0.702128	4.52	1	MRI(+)/cytology(-)<MRI(-)/cytology(-)
2634	246.139	8.86	0.8	0.702128	3.14	1	MRI(+)/cytology(-)>MRI(-)/cytology(-)
2980	275.279	9.86	0.8	0.702128	5.45	1	MRI(+)/cytology(-)<MRI(-)/cytology(-)
3202	296.072	9.72	0.8	0.702128	2.64	1	MRI(+)/cytology(-)<MRI(-)/cytology(-)
3560	329.231	12.99	0.8	0.702128	4.38	1	MRI(+)/cytology(-)<MRI(-)/cytology(-)
4257	399.178	10.05	0.8	0.702128	3.88	1	MRI(+)/cytology(-)<MRI(-)/cytology(-)
4424	422.237	14.36	0.8	0.702128	4.84	1	MRI(+)/cytology(-)>MRI(-)/cytology(-)
4757	461.283	9.3	0.8	0.702128	3.34	1	MRI(+)/cytology(-)<MRI(-)/cytology(-)
4852	478.309	8.82	0.8	0.702128	3	1	MRI(+)/cytology(-)<MRI(-)/cytology(-)
2121	214.253	10.08	0.65	0.851064	4.68	1	MRI(+)/cytology(-)>MRI(-)/cytology(-)
2973	275.14	7.88	0.65	0.851064	2.85	1	MRI(+)/cytology(-)>MRI(-)/cytology(-)
3455	318.299	9.71	0.65	0.851064	4.24	1	MRI(+)/cytology(-)>MRI(-)/cytology(-)
202	68.9949	23.46	0.9	0.595745	5.655	1	MRI(+)/cytology(-)>MRI(-)/cytology(-)
226	69.9943	23.03	0.9	0.595745	4.77	1	MRI(+)/cytology(-)>MRI(-)/cytology(-)
278	81.9383	23.7	0.9	0.595745	5.3	1	MRI(+)/cytology(-)>MRI(-)/cytology(-)
525	100.076	8.83	0.9	0.595745	3.365	1	MRI(+)/cytology(-)>MRI(-)/cytology(-)
881	114.955	23.08	0.9	0.595745	5.28	1	MRI(+)/cytology(-)>MRI(-)/cytology(-)
1250	126.96	22.99	0.9	0.595745	5.55	1	MRI(+)/cytology(-)>MRI(-)/cytology(-)
2618	241.178	10.88	0.9	0.595745	3.63	1	MRI(+)/cytology(-)<MRI(-)/cytology(-)
2784	261.032	9.68	0.9	0.595745	3.1	1	MRI(+)/cytology(-)<MRI(-)/cytology(-)
5694	592.381	9.41	0.9	0.595745	3.41	1	MRI(+)/cytology(-)<MRI(-)/cytology(-)
5930	636.42	9.05	0.9	0.595745	3.24	1	MRI(+)/cytology(-)<MRI(-)/cytology(-)
1234	125.97	23	0.75	0.744681	4.78	1	MRI(+)/cytology(-)>MRI(-)/cytology(-)
2462	230.248	9.98	0.75	0.744681	4.74	1	MRI(+)/cytology(-)<MRI(-)/cytology(-)
2464	230.249	9.72	0.75	0.744681	5.595	1	MRI(+)/cytology(-)>MRI(-)/cytology(-)
2966	274.274	9.58	0.75	0.744681	5.88	1	MRI(+)/cytology(-)>MRI(-)/cytology(-)
2991	276.28	9.67	0.75	0.744681	4.635	1	MRI(+)/cytology(-)>MRI(-)/cytology(-)
3150	290.269	9.78	0.75	0.744681	4.56	1	MRI(+)/cytology(-)>MRI(-)/cytology(-)
4003	371.328	12.35	0.75	0.744681	4.495	1	MRI(+)/cytology(-)<MRI(-)/cytology(-)
4799	474.291	8.67	0.75	0.744681	3.54	1	MRI(+)/cytology(-)<MRI(-)/cytology(-)
5125	504.336	8.94	0.75	0.744681	4.22	1	MRI(+)/cytology(-)<MRI(-)/cytology(-)
5751	608.385	8.89	0.75	0.744681	4.23	1	MRI(+)/cytology(-)<MRI(-)/cytology(-)
3578	331.207	9.83	0.6	0.893617	4.43	1	MRI(+)/cytology(-)<MRI(-)/cytology(-)
201	68.9949	23.54	1	0.489362	5.65	1	MRI(+)/cytology(-)>MRI(-)/cytology(-)
212	68.9951	23.78	1	0.489362	5.205	1	MRI(+)/cytology(-)>MRI(-)/cytology(-)
216	68.9951	23.57	1	0.489362	5.66	1	MRI(+)/cytology(-)>MRI(-)/cytology(-)
344	82.9974	23.72	1	0.489362	5.05	1	MRI(+)/cytology(-)>MRI(-)/cytology(-)
351	82.9977	23.51	1	0.489362	5.395	1	MRI(+)/cytology(-)>MRI(-)/cytology(-)
353	82.9977	23.58	1	0.489362	5.41	1	MRI(+)/cytology(-)>MRI(-)/cytology(-)
534	100.955	23.06	1	0.489362	5.18	1	MRI(+)/cytology(-)>MRI(-)/cytology(-)
500	97.9685	23.82	0.85	0.638298	4.95	1	MRI(+)/cytology(-)>MRI(-)/cytology(-)
1332	136.047	1.71	0.85	0.638298	4.66	1	MRI(+)/cytology(-)>MRI(-)/cytology(-)
2668	247.246	9.31	0.85	0.638298	3.56	1	MRI(+)/cytology(-)<MRI(-)/cytology(-)
3217	297.07	9.79	0.85	0.638298	3.35	1	MRI(+)/cytology(-)<MRI(-)/cytology(-)
5138	505.339	8.77	0.85	0.638298	3.56	1	MRI(+)/cytology(-)<MRI(-)/cytology(-)
5193	520.33	9.91	0.85	0.638298	4.5	1	MRI(+)/cytology(-)<MRI(-)/cytology(-)
1942	194.078	8.62	0.7	0.787234	2.85	1	MRI(+)/cytology(-)>MRI(-)/cytology(-)
2475	231.252	9.68	0.7	0.787234	4.345	0	MRI(+)/cytology(-)>MRI(-)/cytology(-)
3165	291.272	9.82	0.7	0.787234	4.185	0	MRI(+)/cytology(-)>MRI(-)/cytology(-)
3199	296.069	9.69	0.7	0.787234	2.59	1	MRI(+)/cytology(-)<MRI(-)/cytology(-)
6	53.0219	22.91	0.95	0.531915	4.64	1	MRI(+)/cytology(-)>MRI(-)/cytology(-)
200	68.9948	23.75	0.95	0.531915	5.36	1	MRI(+)/cytology(-)>MRI(-)/cytology(-)
217	68.9951	23.7	0.95	0.531915	5.22	1	MRI(+)/cytology(-)>MRI(-)/cytology(-)
424	87.9258	23.63	0.95	0.531915	5.23	1	MRI(+)/cytology(-)>MRI(-)/cytology(-)
436	89.9399	23.47	0.95	0.531915	4.995	1	MRI(+)/cytology(-)>MRI(-)/cytology(-)
866	113.948	23.04	0.95	0.531915	4.595	1	MRI(+)/cytology(-)>MRI(-)/cytology(-)
2922	266.172	11.34	0.95	0.531915	3.44	1	MRI(+)/cytology(-)<MRI(-)/cytology(-)
4755	460.846	22.92	0.95	0.531915	4.53	1	MRI(+)/cytology(-)<MRI(-)/cytology(-)
536	100.957	23.07	0.8	0.680851	5.39	1	MRI(+)/cytology(-)>MRI(-)/cytology(-)
1448	141.983	22.99	0.8	0.680851	4.7	1	MRI(+)/cytology(-)>MRI(-)/cytology(-)
1808	175.058	2.1	0.8	0.680851	4.41	1	MRI(+)/cytology(-)<MRI(-)/cytology(-)
2461	230.248	9.8	0.8	0.680851	5.215	1	MRI(+)/cytology(-)<MRI(-)/cytology(-)
3821	353.231	12.2	0.8	0.680851	4.685	1	MRI(+)/cytology(-)<MRI(-)/cytology(-)
4074	384.112	8.84	0.8	0.680851	2.31	1	MRI(+)/cytology(-)<MRI(-)/cytology(-)
4744	460.309	8.58	0.8	0.680851	4.51	1	MRI(+)/cytology(-)<MRI(-)/cytology(-)
5349	536.319	9.85	0.8	0.680851	3.08	1	MRI(+)/cytology(-)<MRI(-)/cytology(-)
6239	773.494	12.58	0.8	0.680851	2.515	1	MRI(+)/cytology(-)<MRI(-)/cytology(-)
2117	214.253	10.07	0.65	0.829787	4.59	1	MRI(+)/cytology(-)>MRI(-)/cytology(-)
2715	254.059	9.62	0.65	0.829787	2.775	1	MRI(+)/cytology(-)<MRI(-)/cytology(-)
5430	548.362	9.19	0.65	0.829787	3.755	1	MRI(+)/cytology(-)<MRI(-)/cytology(-)
421	87.925	23.4	0.9	0.574468	5.75	1	MRI(+)/cytology(-)>MRI(-)/cytology(-)
888	116.952	23.03	0.9	0.574468	4.85	1	MRI(+)/cytology(-)>MRI(-)/cytology(-)
891	117.959	22.99	0.9	0.574468	5.24	1	MRI(+)/cytology(-)>MRI(-)/cytology(-)
1803	175.027	22.98	0.9	0.574468	4.31	1	MRI(+)/cytology(-)<MRI(-)/cytology(-)
2751	257.147	2.12	0.9	0.574468	3.35	1	MRI(+)/cytology(-)>MRI(-)/cytology(-)
3581	331.248	12.18	0.9	0.574468	4.66	1	MRI(+)/cytology(-)<MRI(-)/cytology(-)
886	116.07	2.29	0.75	0.723404	3.66	1	MRI(+)/cytology(-)>MRI(-)/cytology(-)
1841	184.958	22.93	0.75	0.723404	4.13	1	MRI(+)/cytology(-)<MRI(-)/cytology(-)
2118	214.253	10.09	0.75	0.723404	4.68	1	MRI(+)/cytology(-)>MRI(-)/cytology(-)
2125	214.254	9.98	0.75	0.723404	3.58	1	MRI(+)/cytology(-)>MRI(-)/cytology(-)
3820	353.231	12.07	0.75	0.723404	4.96	1	MRI(+)/cytology(-)<MRI(-)/cytology(-)
4372	416.254	9.28	0.75	0.723404	3.97	1	MRI(+)/cytology(-)<MRI(-)/cytology(-)
5931	636.421	8.92	0.75	0.723404	3.22	1	MRI(+)/cytology(-)<MRI(-)/cytology(-)
2760	258.282	10.4	0.6	0.87234	4.51	1	MRI(+)/cytology(-)>MRI(-)/cytology(-)
2829	261.131	7.67	0.6	0.87234	3.39	1	MRI(+)/cytology(-)>MRI(-)/cytology(-)
3253	302.305	10.38	0.6	0.87234	5.13	1	MRI(+)/cytology(-)>MRI(-)/cytology(-)
4930	482.266	9.87	0.6	0.87234	3.76	1	MRI(+)/cytology(-)<MRI(-)/cytology(-)
219	68.996	23.74	1	0.468085	5.27	1	MRI(+)/cytology(-)>MRI(-)/cytology(-)
345	82.9975	23.81	1	0.468085	5.11	1	MRI(+)/cytology(-)>MRI(-)/cytology(-)
437	90.4888	23.53	1	0.468085	4.795	1	MRI(+)/cytology(-)>MRI(-)/cytology(-)
440	90.4904	23.6	1	0.468085	4.79	1	MRI(+)/cytology(-)>MRI(-)/cytology(-)
236	71.9306	23.57	0.85	0.617021	4.895	1	MRI(+)/cytology(-)>MRI(-)/cytology(-)
263	73.9464	23.62	0.85	0.617021	4.74	1	MRI(+)/cytology(-)>MRI(-)/cytology(-)
1497	148.078	1.92	0.85	0.617021	4.43	1	MRI(+)/cytology(-)>MRI(-)/cytology(-)
2743	256.055	9.6	0.85	0.617021	3.035	1	MRI(+)/cytology(-)<MRI(-)/cytology(-)
2932	269.246	14.72	0.85	0.617021	5.08	1	MRI(+)/cytology(-)>MRI(-)/cytology(-)
4742	460.308	8.74	0.85	0.617021	4.32	1	MRI(+)/cytology(-)<MRI(-)/cytology(-)
1857	186.043	23.03	0.7	0.765957	3.98	1	MRI(+)/cytology(-)<MRI(-)/cytology(-)
2101	213.146	11.19	0.7	0.765957	4.715	1	MRI(+)/cytology(-)<MRI(-)/cytology(-)
2962	274.274	9.97	0.7	0.765957	5.155	0	MRI(+)/cytology(-)<MRI(-)/cytology(-)
2993	276.284	9.86	0.7	0.765957	3.805	1	MRI(+)/cytology(-)<MRI(-)/cytology(-)
3453	318.298	9.81	0.7	0.765957	3.905	1	MRI(+)/cytology(-)<MRI(-)/cytology(-)
3990	371.226	9.81	0.7	0.765957	3.98	1	MRI(+)/cytology(-)<MRI(-)/cytology(-)
5217	522.333	8.95	0.7	0.765957	2.87	1	MRI(+)/cytology(-)<MRI(-)/cytology(-)
3517	327.202	8.55	0.55	0.914894	4.22	1	MRI(+)/cytology(-)<MRI(-)/cytology(-)
5428	548.361	8.84	0.55	0.914894	4	1	MRI(+)/cytology(-)<MRI(-)/cytology(-)
5431	548.362	8.76	0.55	0.914894	4.075	1	MRI(+)/cytology(-)<MRI(-)/cytology(-)
12	55.9367	23.62	0.95	0.510638	4.72	1	MRI(+)/cytology(-)>MRI(-)/cytology(-)
343	82.9974	23.42	0.95	0.510638	5.35	1	MRI(+)/cytology(-)>MRI(-)/cytology(-)
501	97.9685	23.73	0.95	0.510638	5.07	1	MRI(+)/cytology(-)>MRI(-)/cytology(-)
9	55.9362	23.72	0.8	0.659574	4.55	1	MRI(+)/cytology(-)>MRI(-)/cytology(-)
260	73.9459	23.7	0.8	0.659574	4.55	1	MRI(+)/cytology(-)>MRI(-)/cytology(-)
1044	123.084	18.15	0.8	0.659574	4.71	1	MRI(+)/cytology(-)>MRI(-)/cytology(-)
2471	231.249	9.73	0.8	0.659574	5.11	0	MRI(+)/cytology(-)<MRI(-)/cytology(-)
2717	254.061	9.63	0.8	0.659574	2.98	1	MRI(+)/cytology(-)<MRI(-)/cytology(-)
3163	291.271	9.98	0.8	0.659574	3.14	1	MRI(+)/cytology(-)<MRI(-)/cytology(-)
3194	295.228	11.45	0.8	0.659574	4.625	1	MRI(+)/cytology(-)<MRI(-)/cytology(-)
4263	399.25	14.41	0.8	0.659574	5.49	1	MRI(+)/cytology(-)>MRI(-)/cytology(-)
4269	400.256	14.38	0.8	0.659574	4.72	1	MRI(+)/cytology(-)>MRI(-)/cytology(-)
4390	416.285	8.59	0.8	0.659574	4.335	1	MRI(+)/cytology(-)<MRI(-)/cytology(-)
4694	453.228	9.81	0.8	0.659574	3.8	1	MRI(+)/cytology(-)<MRI(-)/cytology(-)
4876	479.321	11.53	0.8	0.659574	2.69	1	MRI(+)/cytology(-)<MRI(-)/cytology(-)
5692	592.36	9.98	0.8	0.659574	3.095	1	MRI(+)/cytology(-)<MRI(-)/cytology(-)
5928	636.417	9.1	0.8	0.659574	2.88	1	MRI(+)/cytology(-)<MRI(-)/cytology(-)
1053	123.099	18.92	0.65	0.808511	4.795	1	MRI(+)/cytology(-)>MRI(-)/cytology(-)
3254	302.305	10.4	0.65	0.808511	5.39	1	MRI(+)/cytology(-)>MRI(-)/cytology(-)
3271	303.309	10.38	0.65	0.808511	4.49	1	MRI(+)/cytology(-)>MRI(-)/cytology(-)
4237	395.216	9.06	0.65	0.808511	3.23	1	MRI(+)/cytology(-)<MRI(-)/cytology(-)
4781	462.846	22.97	0.65	0.808511	4.07	1	MRI(+)/cytology(-)<MRI(-)/cytology(-)
5801	614.342	8.91	0.65	0.808511	3.015	1	MRI(+)/cytology(-)<MRI(-)/cytology(-)
1070	123.1	18.26	0.5	0.957447	4.8	1	MRI(+)/cytology(-)>MRI(-)/cytology(-)
194	65.9667	23.07	0.9	0.553191	4.9	1	MRI(+)/cytology(-)>MRI(-)/cytology(-)
223	68.9964	23.4	0.9	0.553191	5.44	1	MRI(+)/cytology(-)>MRI(-)/cytology(-)
234	71.93	23.61	0.9	0.553191	4.95	1	MRI(+)/cytology(-)>MRI(-)/cytology(-)
247	72.9384	23.7	0.9	0.553191	5.34	1	MRI(+)/cytology(-)>MRI(-)/cytology(-)
267	76.4872	23.57	0.9	0.553191	5.095	1	MRI(+)/cytology(-)>MRI(-)/cytology(-)
268	76.4873	23.5	0.9	0.553191	5.08	1	MRI(+)/cytology(-)>MRI(-)/cytology(-)
505	97.9694	23.64	0.9	0.553191	5.28	1	MRI(+)/cytology(-)>MRI(-)/cytology(-)
902	118.966	22.98	0.9	0.553191	4.66	1	MRI(+)/cytology(-)>MRI(-)/cytology(-)
1381	137.07	1.7	0.9	0.553191	4.085	1	MRI(+)/cytology(-)>MRI(-)/cytology(-)
1516	153.074	8.5	0.9	0.553191	3.41	1	MRI(+)/cytology(-)>MRI(-)/cytology(-)
1865	186.22	10.52	0.9	0.553191	3.34	1	MRI(+)/cytology(-)<MRI(-)/cytology(-)
2919	265.03	9.68	0.9	0.553191	2.685	1	MRI(+)/cytology(-)<MRI(-)/cytology(-)
3218	297.073	9.72	0.9	0.553191	3.455	1	MRI(+)/cytology(-)<MRI(-)/cytology(-)
183	61.0088	23.01	0.75	0.702128	4.645	1	MRI(+)/cytology(-)>MRI(-)/cytology(-)
184	61.0096	22.98	0.75	0.702128	4.6	1	MRI(+)/cytology(-)>MRI(-)/cytology(-)
885	115.964	23.01	0.75	0.702128	5.59	1	MRI(+)/cytology(-)>MRI(-)/cytology(-)
1530	155.087	8.45	0.75	0.702128	3.585	1	MRI(+)/cytology(-)>MRI(-)/cytology(-)
1828	181.073	7.75	0.75	0.702128	3.58	1	MRI(+)/cytology(-)>MRI(-)/cytology(-)
1843	184.984	23.02	0.75	0.702128	4.81	1	MRI(+)/cytology(-)>MRI(-)/cytology(-)
2028	201.109	8.96	0.75	0.702128	3.455	1	MRI(+)/cytology(-)>MRI(-)/cytology(-)
2698	249.184	13.06	0.75	0.702128	5.29	1	MRI(+)/cytology(-)>MRI(-)/cytology(-)
3152	290.271	9.81	0.75	0.702128	5.01	1	MRI(+)/cytology(-)>MRI(-)/cytology(-)
3441	318.164	9.03	0.75	0.702128	3.475	1	MRI(+)/cytology(-)<MRI(-)/cytology(-)
4231	394.288	12.58	0.75	0.702128	3.86	1	MRI(+)/cytology(-)<MRI(-)/cytology(-)
4273	403.113	2.14	0.75	0.702128	3.005	1	MRI(+)/cytology(-)>MRI(-)/cytology(-)
4423	421.317	12.49	0.75	0.702128	4.22	1	MRI(+)/cytology(-)<MRI(-)/cytology(-)
5390	541.285	9.84	0.75	0.702128	3.3	1	MRI(+)/cytology(-)<MRI(-)/cytology(-)
5965	652.413	8.94	0.75	0.702128	3.525	1	MRI(+)/cytology(-)<MRI(-)/cytology(-)
6001	657.368	8.93	0.75	0.702128	3.37	1	MRI(+)/cytology(-)<MRI(-)/cytology(-)
1790	174.185	8.76	0.6	0.851064	2.515	1	MRI(+)/cytology(-)<MRI(-)/cytology(-)
2036	202.216	9.32	0.6	0.851064	3.64	1	MRI(+)/cytology(-)<MRI(-)/cytology(-)
2780	259.281	10.48	0.6	0.851064	4.13	1	MRI(+)/cytology(-)<MRI(-)/cytology(-)
2986	276.041	9.73	0.6	0.851064	2.59	1	MRI(+)/cytology(-)<MRI(-)/cytology(-)
3798	351.193	7.93	0.6	0.851064	2.95	1	MRI(+)/cytology(-)>MRI(-)/cytology(-)
3822	353.232	11.38	0.6	0.851064	5	1	MRI(+)/cytology(-)>MRI(-)/cytology(-)
3841	357.846	22.97	0.6	0.851064	3.98	1	MRI(+)/cytology(-)<MRI(-)/cytology(-)
4606	437.235	8.65	0.6	0.851064	4.81	1	MRI(+)/cytology(-)<MRI(-)/cytology(-)
4724	459.277	8.62	0.6	0.851064	4.46	1	MRI(+)/cytology(-)<MRI(-)/cytology(-)
4774	462.311	8.67	0.6	0.851064	2.56	1	MRI(+)/cytology(-)<MRI(-)/cytology(-)
213	68.9951	23.81	1	0.446809	5.445	1	MRI(+)/cytology(-)>MRI(-)/cytology(-)
221	68.9961	23.85	1	0.446809	5.2	1	MRI(+)/cytology(-)>MRI(-)/cytology(-)
349	82.9976	23.75	1	0.446809	5.08	1	MRI(+)/cytology(-)>MRI(-)/cytology(-)
356	84.0452	1.92	1	0.446809	5.14	1	MRI(+)/cytology(-)>MRI(-)/cytology(-)
439	90.4903	23.5	1	0.446809	4.73	1	MRI(+)/cytology(-)>MRI(-)/cytology(-)
1431	140.95	23.65	1	0.446809	5.245	1	MRI(+)/cytology(-)>MRI(-)/cytology(-)
5296	527.143	1.89	1	0.446809	4.62	1	MRI(+)/cytology(-)>MRI(-)/cytology(-)
5677	588.811	22.96	1	0.446809	4.71	1	MRI(+)/cytology(-)<MRI(-)/cytology(-)
3	53.0056	0.08	0.85	0.595745	4.99	1	MRI(+)/cytology(-)>MRI(-)/cytology(-)
411	85.9389	23.2	0.85	0.595745	4.84	1	MRI(+)/cytology(-)>MRI(-)/cytology(-)
530	100.932	23.51	0.85	0.595745	5.11	1	MRI(+)/cytology(-)>MRI(-)/cytology(-)
1049	123.099	19.59	0.85	0.595745	4.68	1	MRI(+)/cytology(-)>MRI(-)/cytology(-)
1303	133.105	2.31	0.85	0.595745	3.62	1	MRI(+)/cytology(-)>MRI(-)/cytology(-)
2014	200.236	10.41	0.85	0.595745	3.39	1	MRI(+)/cytology(-)<MRI(-)/cytology(-)
2726	255.062	9.73	0.85	0.595745	3.14	1	MRI(+)/cytology(-)<MRI(-)/cytology(-)
2904	262.142	14.44	0.85	0.595745	4.6	1	MRI(+)/cytology(-)<MRI(-)/cytology(-)
4128	388.255	9.81	0.85	0.595745	4.41	1	MRI(+)/cytology(-)<MRI(-)/cytology(-)
4560	433.286	9.84	0.85	0.595745	4.01	1	MRI(+)/cytology(-)<MRI(-)/cytology(-)
5121	504.334	8.77	0.85	0.595745	4.255	1	MRI(+)/cytology(-)<MRI(-)/cytology(-)
5423	548.331	9.11	0.85	0.595745	4	1	MRI(+)/cytology(-)<MRI(-)/cytology(-)
5750	608.385	9.43	0.85	0.595745	3.97	1	MRI(+)/cytology(-)<MRI(-)/cytology(-)
1507	152.029	1.92	0.7	0.744681	4.53	1	MRI(+)/cytology(-)>MRI(-)/cytology(-)
1681	167.088	7.49	0.7	0.744681	3.72	1	MRI(+)/cytology(-)>MRI(-)/cytology(-)
1860	186.218	9.94	0.7	0.744681	3.43	1	MRI(+)/cytology(-)<MRI(-)/cytology(-)
2130	214.254	10.13	0.7	0.744681	4.89	1	MRI(+)/cytology(-)>MRI(-)/cytology(-)
2909	262.235	9.38	0.7	0.744681	2.89	1	MRI(+)/cytology(-)<MRI(-)/cytology(-)
3121	284.21	8.87	0.7	0.744681	3.315	1	MRI(+)/cytology(-)<MRI(-)/cytology(-)
3190	295.226	12.1	0.7	0.744681	4.42	1	MRI(+)/cytology(-)<MRI(-)/cytology(-)
3458	318.305	9.91	0.7	0.744681	3.085	1	MRI(+)/cytology(-)<MRI(-)/cytology(-)
3656	340.346	19.7	0.7	0.744681	3.995	1	MRI(+)/cytology(-)>MRI(-)/cytology(-)
4437	425.216	15.47	0.7	0.744681	5.215	1	MRI(+)/cytology(-)>MRI(-)/cytology(-)
5262	525.287	9.89	0.7	0.744681	4.17	1	MRI(+)/cytology(-)<MRI(-)/cytology(-)
5420	547.333	9.01	0.7	0.744681	3.86	1	MRI(+)/cytology(-)<MRI(-)/cytology(-)
5822	615.351	9.06	0.7	0.744681	2.32	1	MRI(+)/cytology(-)<MRI(-)/cytology(-)
2941	271.133	8.27	0.55	0.893617	2.915	1	MRI(+)/cytology(-)>MRI(-)/cytology(-)
4901	481.261	8.62	0.55	0.893617	4.75	1	MRI(+)/cytology(-)<MRI(-)/cytology(-)
784	105.934	23.44	0.95	0.489362	4.95	1	MRI(+)/cytology(-)>MRI(-)/cytology(-)
785	105.935	23.54	0.95	0.489362	5.06	1	MRI(+)/cytology(-)>MRI(-)/cytology(-)
867	113.962	23.51	0.95	0.489362	6.17	1	MRI(+)/cytology(-)>MRI(-)/cytology(-)
2742	256.055	9.66	0.95	0.489362	3.025	1	MRI(+)/cytology(-)<MRI(-)/cytology(-)
3120	284.209	9.05	0.95	0.489362	3.575	1	MRI(+)/cytology(-)<MRI(-)/cytology(-)
668	102.129	16.6	0.8	0.638298	5.345	1	MRI(+)/cytology(-)<MRI(-)/cytology(-)
754	102.955	23.04	0.8	0.638298	4.63	1	MRI(+)/cytology(-)>MRI(-)/cytology(-)
1612	163.116	1.79	0.8	0.638298	3.705	1	MRI(+)/cytology(-)>MRI(-)/cytology(-)
1864	186.22	8.96	0.8	0.638298	2.84	1	MRI(+)/cytology(-)<MRI(-)/cytology(-)
2398	226.952	1.6	0.8	0.638298	6.06	1	MRI(+)/cytology(-)>MRI(-)/cytology(-)
2983	275.915	23.02	0.8	0.638298	4.38	1	MRI(+)/cytology(-)>MRI(-)/cytology(-)
3245	300.902	22.98	0.8	0.638298	4.43	1	MRI(+)/cytology(-)<MRI(-)/cytology(-)
3467	319.225	13.94	0.8	0.638298	4.8	1	MRI(+)/cytology(-)>MRI(-)/cytology(-)
4836	477.307	9.88	0.8	0.638298	4.03	1	MRI(+)/cytology(-)<MRI(-)/cytology(-)
5437	548.366	8.95	0.8	0.638298	4.12	1	MRI(+)/cytology(-)<MRI(-)/cytology(-)
5827	623.305	13.81	0.8	0.638298	3.74	1	MRI(+)/cytology(-)>MRI(-)/cytology(-)
6178	734.751	22.94	0.8	0.638298	4.42	1	MRI(+)/cytology(-)<MRI(-)/cytology(-)
446	90.9771	1.63	0.65	0.787234	4.48	1	MRI(+)/cytology(-)>MRI(-)/cytology(-)
522	100.075	7.64	0.65	0.787234	3.82	1	MRI(+)/cytology(-)>MRI(-)/cytology(-)
927	121.084	7.5	0.65	0.787234	4.19	1	MRI(+)/cytology(-)>MRI(-)/cytology(-)
2428	228.195	12.47	0.65	0.787234	3.52	1	MRI(+)/cytology(-)<MRI(-)/cytology(-)
2476	231.253	10.25	0.65	0.787234	3.84	1	MRI(+)/cytology(-)<MRI(-)/cytology(-)
2531	239.123	8.97	0.65	0.787234	3.57	1	MRI(+)/cytology(-)<MRI(-)/cytology(-)
2617	241.178	10.82	0.65	0.787234	3.71	1	MRI(+)/cytology(-)<MRI(-)/cytology(-)
2956	273.168	9.53	0.65	0.787234	4.21	1	MRI(+)/cytology(-)<MRI(-)/cytology(-)
3200	296.069	9.68	0.65	0.787234	2.48	1	MRI(+)/cytology(-)<MRI(-)/cytology(-)
3460	318.669	8.83	0.65	0.787234	1.85	0	MRI(+)/cytology(-)<MRI(-)/cytology(-)
4383	416.282	8.63	0.65	0.787234	4.02	1	MRI(+)/cytology(-)<MRI(-)/cytology(-)
5696	592.387	8.82	0.65	0.787234	3.75	1	MRI(+)/cytology(-)<MRI(-)/cytology(-)
2098	213.145	11.81	0.5	0.93617	3.69	1	MRI(+)/cytology(-)<MRI(-)/cytology(-)
3789	350.187	7.94	0.5	0.93617	2.9	1	MRI(+)/cytology(-)>MRI(-)/cytology(-)
5445	549.366	8.84	0.5	0.93617	3.3	1	MRI(+)/cytology(-)<MRI(-)/cytology(-)
34	56.9667	22.94	0.9	0.531915	5.385	1	MRI(+)/cytology(-)>MRI(-)/cytology(-)
246	72.9383	23.73	0.9	0.531915	5.29	1	MRI(+)/cytology(-)>MRI(-)/cytology(-)
417	87.9243	23.68	0.9	0.531915	5	1	MRI(+)/cytology(-)>MRI(-)/cytology(-)
438	90.4889	23.45	0.9	0.531915	4.77	1	MRI(+)/cytology(-)>MRI(-)/cytology(-)
775	103.954	23.47	0.9	0.531915	4.45	1	MRI(+)/cytology(-)>MRI(-)/cytology(-)
856	111.968	23.5	0.9	0.531915	4.96	1	MRI(+)/cytology(-)>MRI(-)/cytology(-)
2019	200.238	10.62	0.9	0.531915	3.2	1	MRI(+)/cytology(-)<MRI(-)/cytology(-)
3041	280.264	13.58	0.9	0.531915	3.77	1	MRI(+)/cytology(-)>MRI(-)/cytology(-)
3221	297.242	15.82	0.9	0.531915	5.07	1	MRI(+)/cytology(-)>MRI(-)/cytology(-)
3509	327.193	10.83	0.9	0.531915	4	1	MRI(+)/cytology(-)<MRI(-)/cytology(-)
4441	426.219	15.53	0.9	0.531915	4.8	1	MRI(+)/cytology(-)>MRI(-)/cytology(-)
4662	446.836	22.94	0.9	0.531915	4.57	1	MRI(+)/cytology(-)<MRI(-)/cytology(-)
4794	466.805	22.96	0.9	0.531915	4.57	1	MRI(+)/cytology(-)<MRI(-)/cytology(-)
5426	548.335	9.94	0.9	0.531915	3.755	1	MRI(+)/cytology(-)<MRI(-)/cytology(-)
250	72.9386	23.53	0.75	0.680851	6.11	1	MRI(+)/cytology(-)>MRI(-)/cytology(-)
1269	129.978	22.93	0.75	0.680851	4.26	1	MRI(+)/cytology(-)>MRI(-)/cytology(-)
2415	227.201	13.06	0.75	0.680851	4.83	1	MRI(+)/cytology(-)>MRI(-)/cytology(-)
2607	240.179	7.55	0.75	0.680851	3.465	1	MRI(+)/cytology(-)>MRI(-)/cytology(-)
3636	339.251	13.38	0.75	0.680851	4.86	1	MRI(+)/cytology(-)>MRI(-)/cytology(-)
4028	372.261	8.77	0.75	0.680851	3.8	1	MRI(+)/cytology(-)<MRI(-)/cytology(-)
4638	438.238	9.84	0.75	0.680851	3.76	1	MRI(+)/cytology(-)<MRI(-)/cytology(-)
4675	448.277	7.99	0.75	0.680851	2.945	1	MRI(+)/cytology(-)>MRI(-)/cytology(-)
5730	596.799	22.98	0.75	0.680851	4.37	1	MRI(+)/cytology(-)<MRI(-)/cytology(-)
6097	701.398	9.52	0.75	0.680851	2.865	1	MRI(+)/cytology(-)>MRI(-)/cytology(-)
6435	929.818	1.53	0.75	0.680851	4.7	1	MRI(+)/cytology(-)>MRI(-)/cytology(-)
737	102.129	24.23	0.6	0.829787	4.7	1	MRI(+)/cytology(-)<MRI(-)/cytology(-)
779	105.032	8.48	0.6	0.829787	3.01	0	MRI(+)/cytology(-)>MRI(-)/cytology(-)
915	120.081	7.49	0.6	0.829787	3.23	1	MRI(+)/cytology(-)>MRI(-)/cytology(-)
1579	158.964	1.67	0.6	0.829787	5.52	1	MRI(+)/cytology(-)>MRI(-)/cytology(-)
1823	181.071	7.66	0.6	0.829787	3.65	1	MRI(+)/cytology(-)>MRI(-)/cytology(-)
2352	226.179	10.67	0.6	0.829787	4.475	1	MRI(+)/cytology(-)>MRI(-)/cytology(-)
2635	246.242	9.3	0.6	0.829787	4.275	1	MRI(+)/cytology(-)<MRI(-)/cytology(-)
2954	273.167	9.36	0.6	0.829787	4.4	1	MRI(+)/cytology(-)<MRI(-)/cytology(-)
4275	403.232	15.49	0.6	0.829787	4.67	1	MRI(+)/cytology(-)>MRI(-)/cytology(-)
4404	417.286	9.22	0.6	0.829787	2.845	1	MRI(+)/cytology(-)<MRI(-)/cytology(-)
3507	327.079	8.12	0.45	0.978723	3.84	1	MRI(+)/cytology(-)<MRI(-)/cytology(-)
259	73.9458	23.52	1	0.425532	5.375	1	MRI(+)/cytology(-)>MRI(-)/cytology(-)
364	84.9609	22.91	1	0.425532	6.04	1	MRI(+)/cytology(-)>MRI(-)/cytology(-)
410	85.9305	23.48	1	0.425532	4.65	1	MRI(+)/cytology(-)>MRI(-)/cytology(-)
420	87.9246	23.51	1	0.425532	5.725	1	MRI(+)/cytology(-)>MRI(-)/cytology(-)
423	87.9258	23.73	1	0.425532	5.085	1	MRI(+)/cytology(-)>MRI(-)/cytology(-)
485	91.0552	1.88	1	0.425532	4.73	1	MRI(+)/cytology(-)>MRI(-)/cytology(-)
517	99.9476	23.51	1	0.425532	5.08	1	MRI(+)/cytology(-)>MRI(-)/cytology(-)
533	100.955	23.1	1	0.425532	5.245	1	MRI(+)/cytology(-)>MRI(-)/cytology(-)
535	100.956	23.03	1	0.425532	5.33	1	MRI(+)/cytology(-)>MRI(-)/cytology(-)
2994	276.911	23.4	1	0.425532	4.69	1	MRI(+)/cytology(-)<MRI(-)/cytology(-)
193	65.9667	22.97	0.85	0.574468	4.87	1	MRI(+)/cytology(-)>MRI(-)/cytology(-)
251	72.9388	23.53	0.85	0.574468	6.22	1	MRI(+)/cytology(-)>MRI(-)/cytology(-)
360	84.9601	23.66	0.85	0.574468	4.92	1	MRI(+)/cytology(-)>MRI(-)/cytology(-)
412	85.9399	23.21	0.85	0.574468	4.91	1	MRI(+)/cytology(-)>MRI(-)/cytology(-)
504	97.969	23.84	0.85	0.574468	4.91	1	MRI(+)/cytology(-)>MRI(-)/cytology(-)
776	103.955	23.58	0.85	0.574468	4.32	1	MRI(+)/cytology(-)>MRI(-)/cytology(-)
815	109.943	23.68	0.85	0.574468	4.53	1	MRI(+)/cytology(-)>MRI(-)/cytology(-)
2984	276.039	9.79	0.85	0.574468	2.76	1	MRI(+)/cytology(-)<MRI(-)/cytology(-)
3412	311.294	16.27	0.85	0.574468	4.57	1	MRI(+)/cytology(-)>MRI(-)/cytology(-)
4373	416.255	9.84	0.85	0.574468	3.9	1	MRI(+)/cytology(-)<MRI(-)/cytology(-)
4405	417.287	8.59	0.85	0.574468	3.55	1	MRI(+)/cytology(-)<MRI(-)/cytology(-)
4659	440.249	8.9	0.85	0.574468	2.59	1	MRI(+)/cytology(-)<MRI(-)/cytology(-)
4758	461.284	8.94	0.85	0.574468	3.43	1	MRI(+)/cytology(-)<MRI(-)/cytology(-)
4768	461.314	8.88	0.85	0.574468	3.56	1	MRI(+)/cytology(-)<MRI(-)/cytology(-)
4861	478.322	9.88	0.85	0.574468	3.08	1	MRI(+)/cytology(-)<MRI(-)/cytology(-)
4862	478.322	11.52	0.85	0.574468	3.44	1	MRI(+)/cytology(-)<MRI(-)/cytology(-)
5450	549.367	8.36	0.85	0.574468	5.335	1	MRI(+)/cytology(-)<MRI(-)/cytology(-)
5818	615.345	8.92	0.85	0.574468	2.56	1	MRI(+)/cytology(-)<MRI(-)/cytology(-)
113	59.052	8.59	0.7	0.723404	4.54	1	MRI(+)/cytology(-)>MRI(-)/cytology(-)
1548	158.929	23.02	0.7	0.723404	3.98	1	MRI(+)/cytology(-)<MRI(-)/cytology(-)
2757	258.28	10.53	0.7	0.723404	4.52	1	MRI(+)/cytology(-)<MRI(-)/cytology(-)
3270	303.309	10.42	0.7	0.723404	4.73	1	MRI(+)/cytology(-)>MRI(-)/cytology(-)
3530	328.21	8.52	0.7	0.723404	3.475	1	MRI(+)/cytology(-)<MRI(-)/cytology(-)
3591	334.786	23.49	0.7	0.723404	4.98	1	MRI(+)/cytology(-)<MRI(-)/cytology(-)
6440	940.825	1.71	0.7	0.723404	5.56	1	MRI(+)/cytology(-)>MRI(-)/cytology(-)
1912	191.077	1.61	0.55	0.87234	4.31	1	MRI(+)/cytology(-)>MRI(-)/cytology(-)
1991	197.099	1.68	0.55	0.87234	4.45	1	MRI(+)/cytology(-)>MRI(-)/cytology(-)
2064	205.095	7.66	0.55	0.87234	3.83	1	MRI(+)/cytology(-)>MRI(-)/cytology(-)
2350	226.094	8.04	0.55	0.87234	3.455	1	MRI(+)/cytology(-)>MRI(-)/cytology(-)
2500	235.131	10.87	0.55	0.87234	4.8	1	MRI(+)/cytology(-)>MRI(-)/cytology(-)
3988	371.224	8.63	0.55	0.87234	4.22	1	MRI(+)/cytology(-)<MRI(-)/cytology(-)
4029	372.261	8.88	0.55	0.87234	3.57	1	MRI(+)/cytology(-)<MRI(-)/cytology(-)
4363	415.252	8.65	0.55	0.87234	4.3	1	MRI(+)/cytology(-)<MRI(-)/cytology(-)
4831	476.315	8.7	0.55	0.87234	3.93	1	MRI(+)/cytology(-)<MRI(-)/cytology(-)
5285	526.29	8.98	0.55	0.87234	3.76	1	MRI(+)/cytology(-)<MRI(-)/cytology(-)
5489	564.358	8.83	0.55	0.87234	4.52	1	MRI(+)/cytology(-)<MRI(-)/cytology(-)
5949	638.423	8.61	0.55	0.87234	2.34	1	MRI(+)/cytology(-)<MRI(-)/cytology(-)
475	91.055	0.16	0.95	0.468085	4.85	1	MRI(+)/cytology(-)>MRI(-)/cytology(-)
513	98.9757	23.04	0.95	0.468085	4.66	1	MRI(+)/cytology(-)>MRI(-)/cytology(-)
598	102.127	9.98	0.95	0.468085	5.495	1	MRI(+)/cytology(-)<MRI(-)/cytology(-)
679	102.129	10.75	0.95	0.468085	5.53	1	MRI(+)/cytology(-)<MRI(-)/cytology(-)
687	102.129	10.27	0.95	0.468085	5.495	1	MRI(+)/cytology(-)<MRI(-)/cytology(-)
705	102.129	9.46	0.95	0.468085	5.6	1	MRI(+)/cytology(-)<MRI(-)/cytology(-)
714	102.129	9.35	0.95	0.468085	5.2	1	MRI(+)/cytology(-)<MRI(-)/cytology(-)
816	109.943	23.53	0.95	0.468085	5.32	1	MRI(+)/cytology(-)>MRI(-)/cytology(-)
1294	131.052	1.92	0.95	0.468085	4.76	1	MRI(+)/cytology(-)>MRI(-)/cytology(-)
1424	138.98	23.04	0.95	0.468085	4.62	1	MRI(+)/cytology(-)>MRI(-)/cytology(-)
1913	191.077	1.48	0.95	0.468085	4.12	1	MRI(+)/cytology(-)>MRI(-)/cytology(-)
2752	257.147	2.13	0.95	0.468085	3.3	1	MRI(+)/cytology(-)>MRI(-)/cytology(-)
5308	528.147	1.94	0.95	0.468085	4.05	1	MRI(+)/cytology(-)>MRI(-)/cytology(-)
248	72.9384	23.6	0.8	0.617021	5.635	1	MRI(+)/cytology(-)>MRI(-)/cytology(-)
256	73.0658	2.27	0.8	0.617021	5.04	1	MRI(+)/cytology(-)>MRI(-)/cytology(-)
418	87.9244	23.82	0.8	0.617021	4.96	1	MRI(+)/cytology(-)>MRI(-)/cytology(-)
514	99.9253	23.55	0.8	0.617021	4.81	1	MRI(+)/cytology(-)>MRI(-)/cytology(-)
519	99.949	22.96	0.8	0.617021	4.71	1	MRI(+)/cytology(-)>MRI(-)/cytology(-)
732	102.129	23.32	0.8	0.617021	4.83	1	MRI(+)/cytology(-)<MRI(-)/cytology(-)
1041	123.082	19	0.8	0.617021	4.42	1	MRI(+)/cytology(-)>MRI(-)/cytology(-)
1544	158.154	12.31	0.8	0.617021	4.25	1	MRI(+)/cytology(-)<MRI(-)/cytology(-)
1710	171.113	8.33	0.8	0.617021	3.32	1	MRI(+)/cytology(-)>MRI(-)/cytology(-)
2073	209.152	11.05	0.8	0.617021	4.04	1	MRI(+)/cytology(-)<MRI(-)/cytology(-)
2504	235.17	14.13	0.8	0.617021	4.44	1	MRI(+)/cytology(-)<MRI(-)/cytology(-)
2934	269.249	14.69	0.8	0.617021	4.97	1	MRI(+)/cytology(-)>MRI(-)/cytology(-)
2999	277.124	8.59	0.8	0.617021	4.06	1	MRI(+)/cytology(-)>MRI(-)/cytology(-)
3043	281.248	13.44	0.8	0.617021	4.5	1	MRI(+)/cytology(-)<MRI(-)/cytology(-)
3153	290.272	10.31	0.8	0.617021	3.62	1	MRI(+)/cytology(-)<MRI(-)/cytology(-)
3537	328.232	8.92	0.8	0.617021	3.68	1	MRI(+)/cytology(-)<MRI(-)/cytology(-)
3786	350.186	9.74	0.8	0.617021	3.38	1	MRI(+)/cytology(-)<MRI(-)/cytology(-)
3922	363.201	8.56	0.8	0.617021	3.085	1	MRI(+)/cytology(-)>MRI(-)/cytology(-)
4009	372.231	9.04	0.8	0.617021	3.78	1	MRI(+)/cytology(-)<MRI(-)/cytology(-)
4111	387.269	13.66	0.8	0.617021	4.37	1	MRI(+)/cytology(-)<MRI(-)/cytology(-)
4536	432.281	8.63	0.8	0.617021	4.85	1	MRI(+)/cytology(-)<MRI(-)/cytology(-)
4745	460.309	8.63	0.8	0.617021	4.39	1	MRI(+)/cytology(-)<MRI(-)/cytology(-)
5280	525.29	9.91	0.8	0.617021	4.54	1	MRI(+)/cytology(-)<MRI(-)/cytology(-)
5953	640.739	22.96	0.8	0.617021	4.39	1	MRI(+)/cytology(-)<MRI(-)/cytology(-)
1692	169.058	1.92	0.65	0.765957	4.86	1	MRI(+)/cytology(-)>MRI(-)/cytology(-)
2459	230.248	10.25	0.65	0.765957	4.68	1	MRI(+)/cytology(-)<MRI(-)/cytology(-)
2665	247.245	9.15	0.65	0.765957	4.275	0	MRI(+)/cytology(-)<MRI(-)/cytology(-)
2741	256.054	9.73	0.65	0.765957	2.69	1	MRI(+)/cytology(-)<MRI(-)/cytology(-)
2977	275.277	9.97	0.65	0.765957	4.3	0	MRI(+)/cytology(-)<MRI(-)/cytology(-)
4707	454.233	8.05	0.65	0.765957	2.81	1	MRI(+)/cytology(-)>MRI(-)/cytology(-)
4822	476.306	8.6	0.65	0.765957	5.02	1	MRI(+)/cytology(-)<MRI(-)/cytology(-)
4839	477.309	8.63	0.65	0.765957	4.17	1	MRI(+)/cytology(-)<MRI(-)/cytology(-)
5124	504.335	8.7	0.65	0.765957	4.365	1	MRI(+)/cytology(-)<MRI(-)/cytology(-)
1523	154.086	7.89	0.5	0.914894	3.17	1	MRI(+)/cytology(-)>MRI(-)/cytology(-)
2100	213.146	11.33	0.5	0.914894	3.92	1	MRI(+)/cytology(-)<MRI(-)/cytology(-)
2683	249.114	8.2	0.5	0.914894	2.965	1	MRI(+)/cytology(-)>MRI(-)/cytology(-)
3780	350.184	8.02	0.5	0.914894	3.005	1	MRI(+)/cytology(-)>MRI(-)/cytology(-)
4811	476.305	8.75	0.5	0.914894	4.825	1	MRI(+)/cytology(-)<MRI(-)/cytology(-)
4996	493.307	8.59	0.5	0.914894	3.21	1	MRI(+)/cytology(-)<MRI(-)/cytology(-)
174	59.9332	23.03	0.9	0.510638	4.47	1	MRI(+)/cytology(-)>MRI(-)/cytology(-)
240	71.9508	23	0.9	0.510638	5.575	1	MRI(+)/cytology(-)>MRI(-)/cytology(-)
252	72.9388	23.85	0.9	0.510638	5.24	1	MRI(+)/cytology(-)>MRI(-)/cytology(-)
258	73.945	23.5	0.9	0.510638	5.26	1	MRI(+)/cytology(-)>MRI(-)/cytology(-)
431	88.9325	23.66	0.9	0.510638	5.28	1	MRI(+)/cytology(-)>MRI(-)/cytology(-)
433	88.9333	23.51	0.9	0.510638	5.8	1	MRI(+)/cytology(-)>MRI(-)/cytology(-)
520	99.9687	23.05	0.9	0.510638	4.865	1	MRI(+)/cytology(-)>MRI(-)/cytology(-)
650	102.129	10.69	0.9	0.510638	5.105	1	MRI(+)/cytology(-)<MRI(-)/cytology(-)
1433	140.951	23.64	0.9	0.510638	5.24	1	MRI(+)/cytology(-)>MRI(-)/cytology(-)
2272	218.107	7.54	0.9	0.510638	3.23	1	MRI(+)/cytology(-)>MRI(-)/cytology(-)
2647	247.044	2.36	0.9	0.510638	4.27	1	MRI(+)/cytology(-)<MRI(-)/cytology(-)
3177	294.206	14.26	0.9	0.510638	4.8	1	MRI(+)/cytology(-)>MRI(-)/cytology(-)
3220	297.241	15.78	0.9	0.510638	4.61	1	MRI(+)/cytology(-)>MRI(-)/cytology(-)
4329	412.866	22.92	0.9	0.510638	4.42	1	MRI(+)/cytology(-)<MRI(-)/cytology(-)
4364	415.252	8.67	0.9	0.510638	4.525	1	MRI(+)/cytology(-)<MRI(-)/cytology(-)
4541	432.282	9.84	0.9	0.510638	4.79	1	MRI(+)/cytology(-)<MRI(-)/cytology(-)
4863	478.819	22.91	0.9	0.510638	4.99	1	MRI(+)/cytology(-)<MRI(-)/cytology(-)
6363	854.726	20.13	0.9	0.510638	3.31	1	MRI(+)/cytology(-)>MRI(-)/cytology(-)
25	56.0526	22.66	0.75	0.659574	4.17	1	MRI(+)/cytology(-)>MRI(-)/cytology(-)
662	102.129	8.34	0.75	0.659574	4.65	1	MRI(+)/cytology(-)<MRI(-)/cytology(-)
727	102.129	23.18	0.75	0.659574	4.485	1	MRI(+)/cytology(-)<MRI(-)/cytology(-)
1452	143.055	1.37	0.75	0.659574	4.015	1	MRI(+)/cytology(-)>MRI(-)/cytology(-)
1868	186.222	9.8	0.75	0.659574	4.35	1	MRI(+)/cytology(-)>MRI(-)/cytology(-)
2201	217.104	7.7	0.75	0.659574	4.25	1	MRI(+)/cytology(-)>MRI(-)/cytology(-)
2487	233.1	7.63	0.75	0.659574	3.4	1	MRI(+)/cytology(-)>MRI(-)/cytology(-)
3457	318.302	9.74	0.75	0.659574	4.435	1	MRI(+)/cytology(-)<MRI(-)/cytology(-)
3633	339.249	13.44	0.75	0.659574	4.325	1	MRI(+)/cytology(-)<MRI(-)/cytology(-)
4011	372.233	8.59	0.75	0.659574	3.5	1	MRI(+)/cytology(-)<MRI(-)/cytology(-)
4410	417.288	9.05	0.75	0.659574	3.145	1	MRI(+)/cytology(-)<MRI(-)/cytology(-)
4736	460.282	8.94	0.75	0.659574	4.14	1	MRI(+)/cytology(-)<MRI(-)/cytology(-)
4823	476.306	9.88	0.75	0.659574	4.9	1	MRI(+)/cytology(-)<MRI(-)/cytology(-)
4835	477.306	8.94	0.75	0.659574	4.08	1	MRI(+)/cytology(-)<MRI(-)/cytology(-)
4955	484.283	8.67	0.75	0.659574	2.52	1	MRI(+)/cytology(-)<MRI(-)/cytology(-)
5104	503.304	8.96	0.75	0.659574	4.12	1	MRI(+)/cytology(-)<MRI(-)/cytology(-)
5117	504.307	9.91	0.75	0.659574	3.935	1	MRI(+)/cytology(-)<MRI(-)/cytology(-)
5248	524.271	13.35	0.75	0.659574	3.335	1	MRI(+)/cytology(-)<MRI(-)/cytology(-)
5374	540.537	15.07	0.75	0.659574	4.52	1	MRI(+)/cytology(-)>MRI(-)/cytology(-)
5584	569.312	8.89	0.75	0.659574	4.37	1	MRI(+)/cytology(-)<MRI(-)/cytology(-)
5600	570.318	9.01	0.75	0.659574	3.7	1	MRI(+)/cytology(-)<MRI(-)/cytology(-)
6013	659.365	9.28	0.75	0.659574	1.78	0	MRI(+)/cytology(-)>MRI(-)/cytology(-)
6023	668.865	1.62	0.75	0.659574	5.22	1	MRI(+)/cytology(-)>MRI(-)/cytology(-)
6384	861.503	1.71	0.75	0.659574	4.46	1	MRI(+)/cytology(-)>MRI(-)/cytology(-)
6445	941.816	1.66	0.75	0.659574	4.84	1	MRI(+)/cytology(-)>MRI(-)/cytology(-)
887	116.071	2.19	0.6	0.808511	3.775	1	MRI(+)/cytology(-)>MRI(-)/cytology(-)
1542	158.154	11.88	0.6	0.808511	5.36	1	MRI(+)/cytology(-)<MRI(-)/cytology(-)
1839	183.085	2.09	0.6	0.808511	4.07	1	MRI(+)/cytology(-)>MRI(-)/cytology(-)
1975	195.122	7.69	0.6	0.808511	4.04	1	MRI(+)/cytology(-)>MRI(-)/cytology(-)
2957	273.915	23	0.6	0.808511	4.81	1	MRI(+)/cytology(-)>MRI(-)/cytology(-)
3114	284.207	8.75	0.6	0.808511	3.54	1	MRI(+)/cytology(-)<MRI(-)/cytology(-)
3791	350.188	8.88	0.6	0.808511	3.325	1	MRI(+)/cytology(-)<MRI(-)/cytology(-)
3815	353.229	11.37	0.6	0.808511	4.9	1	MRI(+)/cytology(-)>MRI(-)/cytology(-)
4282	404.248	8.98	0.6	0.808511	3.43	1	MRI(+)/cytology(-)<MRI(-)/cytology(-)
4733	459.857	22.92	0.6	0.808511	4.36	1	MRI(+)/cytology(-)<MRI(-)/cytology(-)
4746	460.31	8.52	0.6	0.808511	4.485	1	MRI(+)/cytology(-)<MRI(-)/cytology(-)
5017	497.253	8.62	0.6	0.808511	4.01	1	MRI(+)/cytology(-)<MRI(-)/cytology(-)
5679	591.351	8.96	0.6	0.808511	3.28	1	MRI(+)/cytology(-)<MRI(-)/cytology(-)
3128	285.208	7.67	0.45	0.957447	3.13	1	MRI(+)/cytology(-)>MRI(-)/cytology(-)
7	54.4994	22.92	1	0.404255	4.275	1	MRI(+)/cytology(-)>MRI(-)/cytology(-)
232	71.9299	23.71	1	0.404255	4.84	1	MRI(+)/cytology(-)>MRI(-)/cytology(-)
492	91.0562	17.49	1	0.404255	3.23	1	MRI(+)/cytology(-)>MRI(-)/cytology(-)
496	97.9319	23.53	1	0.404255	5.51	1	MRI(+)/cytology(-)>MRI(-)/cytology(-)
502	97.9688	23.52	1	0.404255	5.7	1	MRI(+)/cytology(-)>MRI(-)/cytology(-)
515	99.9469	23.57	1	0.404255	5.13	1	MRI(+)/cytology(-)>MRI(-)/cytology(-)
1432	140.951	23.6	1	0.404255	5.22	1	MRI(+)/cytology(-)>MRI(-)/cytology(-)
6065	695.188	1.94	1	0.404255	3.975	1	MRI(+)/cytology(-)>MRI(-)/cytology(-)
254	73.0658	0.08	0.85	0.553191	4.81	1	MRI(+)/cytology(-)>MRI(-)/cytology(-)
428	88.9323	23.55	0.85	0.553191	5.87	1	MRI(+)/cytology(-)>MRI(-)/cytology(-)
434	88.9535	22.96	0.85	0.553191	4.21	1	MRI(+)/cytology(-)>MRI(-)/cytology(-)
508	98.9587	23.07	0.85	0.553191	5.1	1	MRI(+)/cytology(-)>MRI(-)/cytology(-)
531	100.933	23.57	0.85	0.553191	4.635	1	MRI(+)/cytology(-)>MRI(-)/cytology(-)
532	100.954	23.09	0.85	0.553191	5.22	1	MRI(+)/cytology(-)>MRI(-)/cytology(-)
698	102.129	9.34	0.85	0.553191	5.17	1	MRI(+)/cytology(-)<MRI(-)/cytology(-)
1043	123.083	18.27	0.85	0.553191	4.72	1	MRI(+)/cytology(-)>MRI(-)/cytology(-)
1206	124.088	8.4	0.85	0.553191	3.54	1	MRI(+)/cytology(-)>MRI(-)/cytology(-)
1447	141.959	23.63	0.85	0.553191	5.65	1	MRI(+)/cytology(-)>MRI(-)/cytology(-)
1490	147.076	1.92	0.85	0.553191	5.41	1	MRI(+)/cytology(-)>MRI(-)/cytology(-)
2859	261.132	15.87	0.85	0.553191	5.085	1	MRI(+)/cytology(-)>MRI(-)/cytology(-)
3002	277.125	7.62	0.85	0.553191	3.35	1	MRI(+)/cytology(-)>MRI(-)/cytology(-)
3703	347.168	8.55	0.85	0.553191	3.35	1	MRI(+)/cytology(-)<MRI(-)/cytology(-)
5793	613.345	9.06	0.85	0.553191	4.095	1	MRI(+)/cytology(-)<MRI(-)/cytology(-)
1525	154.086	8.43	0.7	0.702128	3	1	MRI(+)/cytology(-)>MRI(-)/cytology(-)
4856	478.311	8.94	0.7	0.702128	3.165	1	MRI(+)/cytology(-)<MRI(-)/cytology(-)
5707	593.386	8.79	0.7	0.702128	3.035	1	MRI(+)/cytology(-)<MRI(-)/cytology(-)
5719	593.399	8.84	0.7	0.702128	2.985	1	MRI(+)/cytology(-)<MRI(-)/cytology(-)
870	114.089	9.07	0.55	0.851064	4.06	1	MRI(+)/cytology(-)>MRI(-)/cytology(-)
2035	202.216	9.49	0.55	0.851064	3.54	0	MRI(+)/cytology(-)<MRI(-)/cytology(-)
2286	218.21	8.79	0.55	0.851064	3.4	1	MRI(+)/cytology(-)<MRI(-)/cytology(-)
2525	238.1	8.27	0.55	0.851064	2.74	1	MRI(+)/cytology(-)<MRI(-)/cytology(-)
2759	258.281	10.91	0.55	0.851064	3.68	1	MRI(+)/cytology(-)<MRI(-)/cytology(-)
3992	371.227	8.59	0.55	0.851064	4.35	1	MRI(+)/cytology(-)<MRI(-)/cytology(-)
4020	372.258	8.54	0.55	0.851064	3.97	1	MRI(+)/cytology(-)<MRI(-)/cytology(-)
4558	433.284	8.99	0.55	0.851064	3.94	1	MRI(+)/cytology(-)<MRI(-)/cytology(-)
4672	448.276	8.47	0.55	0.851064	3.72	1	MRI(+)/cytology(-)<MRI(-)/cytology(-)
4858	478.313	8.57	0.55	0.851064	3.235	1	MRI(+)/cytology(-)<MRI(-)/cytology(-)
4978	492.299	8.88	0.55	0.851064	3.41	1	MRI(+)/cytology(-)<MRI(-)/cytology(-)
5196	520.332	8.61	0.55	0.851064	4.95	1	MRI(+)/cytology(-)<MRI(-)/cytology(-)
5210	521.335	8.6	0.55	0.851064	4.31	1	MRI(+)/cytology(-)<MRI(-)/cytology(-)
5226	522.339	8.66	0.55	0.851064	3.085	1	MRI(+)/cytology(-)<MRI(-)/cytology(-)
5830	624.377	8.98	0.55	0.851064	2.11	0	MRI(+)/cytology(-)<MRI(-)/cytology(-)
2694	249.133	8.25	0.4	1	4.02	1	MRI(+)/cytology(-)>MRI(-)/cytology(-)
275	81.938	23.61	0.95	0.446809	5.6	1	MRI(+)/cytology(-)>MRI(-)/cytology(-)
378	85.0406	18.6	0.95	0.446809	2.71	1	MRI(+)/cytology(-)>MRI(-)/cytology(-)
503	97.9689	23.5	0.95	0.446809	5.69	1	MRI(+)/cytology(-)>MRI(-)/cytology(-)
3183	295.19	13.12	0.95	0.446809	4.18	1	MRI(+)/cytology(-)>MRI(-)/cytology(-)
3659	341.267	15.78	0.95	0.446809	4.91	1	MRI(+)/cytology(-)>MRI(-)/cytology(-)
4767	461.313	8.23	0.95	0.446809	5.38	1	MRI(+)/cytology(-)<MRI(-)/cytology(-)
4803	475.836	22.94	0.95	0.446809	4.975	1	MRI(+)/cytology(-)<MRI(-)/cytology(-)
363	84.9608	23.75	0.8	0.595745	5.03	1	MRI(+)/cytology(-)>MRI(-)/cytology(-)
689	102.129	23.25	0.8	0.595745	5.285	1	MRI(+)/cytology(-)<MRI(-)/cytology(-)
699	102.129	11.85	0.8	0.595745	5.33	1	MRI(+)/cytology(-)<MRI(-)/cytology(-)
738	102.129	23.21	0.8	0.595745	5.03	1	MRI(+)/cytology(-)<MRI(-)/cytology(-)
760	103.055	7.49	0.8	0.595745	3.64	1	MRI(+)/cytology(-)>MRI(-)/cytology(-)
1226	124.964	23	0.8	0.595745	5.82	1	MRI(+)/cytology(-)>MRI(-)/cytology(-)
2212	217.105	7.59	0.8	0.595745	4.17	1	MRI(+)/cytology(-)>MRI(-)/cytology(-)
3039	279.159	14.7	0.8	0.595745	4.77	1	MRI(+)/cytology(-)>MRI(-)/cytology(-)
3182	295.19	12.77	0.8	0.595745	4.96	1	MRI(+)/cytology(-)<MRI(-)/cytology(-)
3816	353.229	11.4	0.8	0.595745	4.95	1	MRI(+)/cytology(-)>MRI(-)/cytology(-)
5114	504.305	9.01	0.8	0.595745	4.14	1	MRI(+)/cytology(-)<MRI(-)/cytology(-)
1506	151.048	1.92	0.65	0.744681	4.58	1	MRI(+)/cytology(-)>MRI(-)/cytology(-)
1545	158.155	11.77	0.65	0.744681	5.275	1	MRI(+)/cytology(-)>MRI(-)/cytology(-)
1580	158.964	20.52	0.65	0.744681	2.94	0	MRI(+)/cytology(-)<MRI(-)/cytology(-)
1787	174.184	8.72	0.65	0.744681	2.59	1	MRI(+)/cytology(-)<MRI(-)/cytology(-)
2097	213.145	11.23	0.65	0.744681	4.185	1	MRI(+)/cytology(-)<MRI(-)/cytology(-)
3273	303.311	10.87	0.65	0.744681	3.23	1	MRI(+)/cytology(-)<MRI(-)/cytology(-)
4328	411.094	14.97	0.65	0.744681	3.53	1	MRI(+)/cytology(-)<MRI(-)/cytology(-)
4726	459.278	9.88	0.65	0.744681	4.14	1	MRI(+)/cytology(-)<MRI(-)/cytology(-)
4898	481.261	8.91	0.65	0.744681	4.19	1	MRI(+)/cytology(-)<MRI(-)/cytology(-)
5706	592.394	9.24	0.65	0.744681	3.295	1	MRI(+)/cytology(-)<MRI(-)/cytology(-)
869	114.066	1.73	0.5	0.893617	5.03	1	MRI(+)/cytology(-)>MRI(-)/cytology(-)
1246	126.092	8.56	0.5	0.893617	3.28	1	MRI(+)/cytology(-)>MRI(-)/cytology(-)
1522	154.086	8.45	0.5	0.893617	3.1	0	MRI(+)/cytology(-)>MRI(-)/cytology(-)
1937	193.095	9.01	0.5	0.893617	3.5	1	MRI(+)/cytology(-)>MRI(-)/cytology(-)
1995	198.073	8.18	0.5	0.893617	2.83	1	MRI(+)/cytology(-)>MRI(-)/cytology(-)
4381	416.259	8.65	0.5	0.893617	3.28	1	MRI(+)/cytology(-)<MRI(-)/cytology(-)
4711	454.237	8.58	0.5	0.893617	3.18	1	MRI(+)/cytology(-)<MRI(-)/cytology(-)
5200	520.333	8.81	0.5	0.893617	4.75	1	MRI(+)/cytology(-)<MRI(-)/cytology(-)
5351	536.321	8.59	0.5	0.893617	3.355	1	MRI(+)/cytology(-)<MRI(-)/cytology(-)
5605	570.32	8.81	0.5	0.893617	3.65	1	MRI(+)/cytology(-)<MRI(-)/cytology(-)
5962	652.409	9.09	0.5	0.893617	3.305	1	MRI(+)/cytology(-)<MRI(-)/cytology(-)
279	81.9384	23.57	0.9	0.489362	6.22	1	MRI(+)/cytology(-)>MRI(-)/cytology(-)
282	81.9389	23.48	0.9	0.489362	6.21	1	MRI(+)/cytology(-)>MRI(-)/cytology(-)
430	88.9324	23.72	0.9	0.489362	5.24	1	MRI(+)/cytology(-)>MRI(-)/cytology(-)
443	90.9757	1.57	0.9	0.489362	4.48	1	MRI(+)/cytology(-)>MRI(-)/cytology(-)
560	102.126	23.29	0.9	0.489362	4.44	1	MRI(+)/cytology(-)<MRI(-)/cytology(-)
562	102.126	14.55	0.9	0.489362	4.785	1	MRI(+)/cytology(-)<MRI(-)/cytology(-)
704	102.129	10.14	0.9	0.489362	5.53	1	MRI(+)/cytology(-)<MRI(-)/cytology(-)
707	102.129	11.04	0.9	0.489362	5.605	1	MRI(+)/cytology(-)<MRI(-)/cytology(-)
807	107.086	0.06	0.9	0.489362	4.72	1	MRI(+)/cytology(-)>MRI(-)/cytology(-)
1430	140.948	23.54	0.9	0.489362	5.05	1	MRI(+)/cytology(-)>MRI(-)/cytology(-)
2027	201.109	8.73	0.9	0.489362	3.28	1	MRI(+)/cytology(-)>MRI(-)/cytology(-)
2060	205.085	14.8	0.9	0.489362	4.79	1	MRI(+)/cytology(-)<MRI(-)/cytology(-)
3145	289.153	13.92	0.9	0.489362	4.675	1	MRI(+)/cytology(-)>MRI(-)/cytology(-)
3705	347.169	8.47	0.9	0.489362	3.4	1	MRI(+)/cytology(-)<MRI(-)/cytology(-)
4012	372.233	9.23	0.9	0.489362	3.31	1	MRI(+)/cytology(-)<MRI(-)/cytology(-)
4115	388.253	8.59	0.9	0.489362	4.46	1	MRI(+)/cytology(-)<MRI(-)/cytology(-)
4176	393.208	8.69	0.9	0.489362	4.475	1	MRI(+)/cytology(-)<MRI(-)/cytology(-)
4386	416.284	8.68	0.9	0.489362	4.085	1	MRI(+)/cytology(-)<MRI(-)/cytology(-)
4576	434.288	8.67	0.9	0.489362	2.905	0	MRI(+)/cytology(-)<MRI(-)/cytology(-)
5439	549.359	9.89	0.9	0.489362	2.885	1	MRI(+)/cytology(-)<MRI(-)/cytology(-)
5630	578.795	22.92	0.9	0.489362	4.31	1	MRI(+)/cytology(-)<MRI(-)/cytology(-)
5709	593.388	8.62	0.9	0.489362	5.275	1	MRI(+)/cytology(-)<MRI(-)/cytology(-)
5938	637.413	8.5	0.9	0.489362	4.905	1	MRI(+)/cytology(-)<MRI(-)/cytology(-)
6347	853.729	20.13	0.9	0.489362	3.41	1	MRI(+)/cytology(-)>MRI(-)/cytology(-)
6376	854.732	21.01	0.9	0.489362	3.105	1	MRI(+)/cytology(-)>MRI(-)/cytology(-)
518	99.9478	23.44	0.75	0.638298	5.03	1	MRI(+)/cytology(-)>MRI(-)/cytology(-)
746	102.129	8.48	0.75	0.638298	4.25	1	MRI(+)/cytology(-)<MRI(-)/cytology(-)
959	122.096	20.64	0.75	0.638298	4.31	1	MRI(+)/cytology(-)<MRI(-)/cytology(-)
976	122.097	20.55	0.75	0.638298	4.39	1	MRI(+)/cytology(-)<MRI(-)/cytology(-)
1133	124.087	15.82	0.75	0.638298	5.305	1	MRI(+)/cytology(-)>MRI(-)/cytology(-)
1938	193.095	7.99	0.75	0.638298	3.75	1	MRI(+)/cytology(-)>MRI(-)/cytology(-)
2104	214.251	10.67	0.75	0.638298	3.66	1	MRI(+)/cytology(-)<MRI(-)/cytology(-)
2696	249.182	13.01	0.75	0.638298	5.19	1	MRI(+)/cytology(-)>MRI(-)/cytology(-)
2964	274.274	9.74	0.75	0.638298	6.24	1	MRI(+)/cytology(-)>MRI(-)/cytology(-)
3127	285.205	11.06	0.75	0.638298	4.46	1	MRI(+)/cytology(-)<MRI(-)/cytology(-)
3185	295.191	12.81	0.75	0.638298	4.745	1	MRI(+)/cytology(-)<MRI(-)/cytology(-)
3216	296.258	9.87	0.75	0.638298	3.375	1	MRI(+)/cytology(-)<MRI(-)/cytology(-)
4455	429.32	15.72	0.75	0.638298	4.54	1	MRI(+)/cytology(-)>MRI(-)/cytology(-)
4679	448.881	1.56	0.75	0.638298	4.39	1	MRI(+)/cytology(-)<MRI(-)/cytology(-)
4759	461.284	9.88	0.75	0.638298	3.28	1	MRI(+)/cytology(-)<MRI(-)/cytology(-)
5960	652.408	9.48	0.75	0.638298	3.32	1	MRI(+)/cytology(-)<MRI(-)/cytology(-)
5973	653.411	8.94	0.75	0.638298	2.67	0	MRI(+)/cytology(-)<MRI(-)/cytology(-)
575	102.127	2.32	0.6	0.787234	5.125	1	MRI(+)/cytology(-)<MRI(-)/cytology(-)
1465	144.174	8.59	0.6	0.787234	2.21	0	MRI(+)/cytology(-)<MRI(-)/cytology(-)
1606	162.111	1.81	0.6	0.787234	4.55	1	MRI(+)/cytology(-)>MRI(-)/cytology(-)
1707	171.112	8.42	0.6	0.787234	3.625	1	MRI(+)/cytology(-)>MRI(-)/cytology(-)
1883	188.071	7.66	0.6	0.787234	2.98	1	MRI(+)/cytology(-)>MRI(-)/cytology(-)
2357	226.18	10.81	0.6	0.787234	3.775	1	MRI(+)/cytology(-)<MRI(-)/cytology(-)
3166	291.273	10.03	0.6	0.787234	2.95	1	MRI(+)/cytology(-)<MRI(-)/cytology(-)
3502	326.112	2.07	0.6	0.787234	4.275	1	MRI(+)/cytology(-)>MRI(-)/cytology(-)
4258	399.178	10.02	0.6	0.787234	4.46	1	MRI(+)/cytology(-)>MRI(-)/cytology(-)
4318	410.206	8.51	0.6	0.787234	3.19	1	MRI(+)/cytology(-)<MRI(-)/cytology(-)
4920	482.262	8.94	0.6	0.787234	3.87	1	MRI(+)/cytology(-)<MRI(-)/cytology(-)
4933	482.827	22.56	0.6	0.787234	4.41	1	MRI(+)/cytology(-)>MRI(-)/cytology(-)
4975	492.298	9.84	0.6	0.787234	3.43	1	MRI(+)/cytology(-)<MRI(-)/cytology(-)
5171	514.768	23.01	0.6	0.787234	4.1	1	MRI(+)/cytology(-)<MRI(-)/cytology(-)
5368	537.33	8.66	0.6	0.787234	2.45	1	MRI(+)/cytology(-)<MRI(-)/cytology(-)
5382	541.277	8.67	0.6	0.787234	3.58	1	MRI(+)/cytology(-)<MRI(-)/cytology(-)
5424	548.332	9.4	0.6	0.787234	3.785	1	MRI(+)/cytology(-)<MRI(-)/cytology(-)
5443	549.364	8.96	0.6	0.787234	3.13	1	MRI(+)/cytology(-)<MRI(-)/cytology(-)
1059	123.099	19.36	0.45	0.93617	4.66	1	MRI(+)/cytology(-)>MRI(-)/cytology(-)
1249	126.092	8.88	0.45	0.93617	3.14	1	MRI(+)/cytology(-)>MRI(-)/cytology(-)
1514	153.065	7.83	0.45	0.93617	4.025	1	MRI(+)/cytology(-)>MRI(-)/cytology(-)
5690	591.361	8.87	0.45	0.93617	3.25	1	MRI(+)/cytology(-)<MRI(-)/cytology(-)
242	71.9537	22.95	1	0.382979	5.82	1	MRI(+)/cytology(-)>MRI(-)/cytology(-)
354	83.9977	23.07	1	0.382979	4.82	1	MRI(+)/cytology(-)>MRI(-)/cytology(-)
365	84.9947	23.07	1	0.382979	4.285	1	MRI(+)/cytology(-)>MRI(-)/cytology(-)
409	85.9298	23.44	1	0.382979	4.565	1	MRI(+)/cytology(-)>MRI(-)/cytology(-)
509	98.9598	23.14	1	0.382979	5.22	1	MRI(+)/cytology(-)>MRI(-)/cytology(-)
1426	139.989	23.06	1	0.382979	5.32	1	MRI(+)/cytology(-)>MRI(-)/cytology(-)
1940	193.972	22.98	1	0.382979	4.51	1	MRI(+)/cytology(-)<MRI(-)/cytology(-)
2137	215.016	2.32	1	0.382979	4.505	1	MRI(+)/cytology(-)<MRI(-)/cytology(-)
4678	448.831	22.95	1	0.382979	4.78	1	MRI(+)/cytology(-)<MRI(-)/cytology(-)
255	73.0658	2	0.85	0.531915	4.96	1	MRI(+)/cytology(-)>MRI(-)/cytology(-)
495	97.9313	23.78	0.85	0.531915	4.68	1	MRI(+)/cytology(-)>MRI(-)/cytology(-)
596	102.127	12.72	0.85	0.531915	5.42	1	MRI(+)/cytology(-)<MRI(-)/cytology(-)
703	102.129	8.53	0.85	0.531915	4.76	1	MRI(+)/cytology(-)<MRI(-)/cytology(-)
1262	127.96	23.03	0.85	0.531915	4.69	1	MRI(+)/cytology(-)>MRI(-)/cytology(-)
3231	299.161	14.21	0.85	0.531915	4.94	1	MRI(+)/cytology(-)>MRI(-)/cytology(-)
3533	328.231	9.7	0.85	0.531915	3.33	1	MRI(+)/cytology(-)<MRI(-)/cytology(-)
4834	477.306	8.7	0.85	0.531915	4.24	1	MRI(+)/cytology(-)<MRI(-)/cytology(-)
5399	542.318	13.35	0.85	0.531915	3.32	1	MRI(+)/cytology(-)<MRI(-)/cytology(-)
5417	547.332	8.8	0.85	0.531915	4.07	1	MRI(+)/cytology(-)<MRI(-)/cytology(-)
5758	609.385	8.66	0.85	0.531915	5.57	1	MRI(+)/cytology(-)<MRI(-)/cytology(-)
5937	637.412	8.49	0.85	0.531915	4.905	0	MRI(+)/cytology(-)<MRI(-)/cytology(-)
271	79.9416	23.45	0.7	0.680851	4.98	1	MRI(+)/cytology(-)>MRI(-)/cytology(-)
283	82.0137	22.94	0.7	0.680851	4.38	1	MRI(+)/cytology(-)>MRI(-)/cytology(-)
786	105.954	23.39	0.7	0.680851	4.72	1	MRI(+)/cytology(-)>MRI(-)/cytology(-)
1136	124.087	13.6	0.7	0.680851	4.525	1	MRI(+)/cytology(-)>MRI(-)/cytology(-)
1488	147.065	2.09	0.7	0.680851	3.58	1	MRI(+)/cytology(-)>MRI(-)/cytology(-)
1939	193.157	11.6	0.7	0.680851	4.395	1	MRI(+)/cytology(-)<MRI(-)/cytology(-)
1976	195.122	7.57	0.7	0.680851	4.06	1	MRI(+)/cytology(-)>MRI(-)/cytology(-)
2078	211.169	11.62	0.7	0.680851	4.54	1	MRI(+)/cytology(-)<MRI(-)/cytology(-)
2414	227.2	13.06	0.7	0.680851	4.9	1	MRI(+)/cytology(-)>MRI(-)/cytology(-)
3156	291.083	2.05	0.7	0.680851	4.27	1	MRI(+)/cytology(-)>MRI(-)/cytology(-)
3266	303.144	7.81	0.7	0.680851	2.935	1	MRI(+)/cytology(-)>MRI(-)/cytology(-)
3665	344.226	9.74	0.7	0.680851	4.04	1	MRI(+)/cytology(-)<MRI(-)/cytology(-)
4306	409.205	8.75	0.7	0.680851	3.99	1	MRI(+)/cytology(-)<MRI(-)/cytology(-)
4368	415.253	9.82	0.7	0.680851	4.16	1	MRI(+)/cytology(-)<MRI(-)/cytology(-)
4376	416.256	8.88	0.7	0.680851	4.03	1	MRI(+)/cytology(-)<MRI(-)/cytology(-)
4748	460.312	8.67	0.7	0.680851	4.23	1	MRI(+)/cytology(-)<MRI(-)/cytology(-)
4754	460.315	8.88	0.7	0.680851	4.195	1	MRI(+)/cytology(-)<MRI(-)/cytology(-)
5658	585.299	8.96	0.7	0.680851	3.09	1	MRI(+)/cytology(-)<MRI(-)/cytology(-)
6215	770.851	22.73	0.7	0.680851	3.52	1	MRI(+)/cytology(-)<MRI(-)/cytology(-)
1706	171.112	8.45	0.55	0.829787	3.92	1	MRI(+)/cytology(-)>MRI(-)/cytology(-)
1944	194.079	8.88	0.55	0.829787	2.795	1	MRI(+)/cytology(-)>MRI(-)/cytology(-)
2701	250.177	11.67	0.55	0.829787	4.17	1	MRI(+)/cytology(-)<MRI(-)/cytology(-)
3808	351.201	8.92	0.55	0.829787	3.42	1	MRI(+)/cytology(-)<MRI(-)/cytology(-)
3919	363.2	8.45	0.55	0.829787	3.09	1	MRI(+)/cytology(-)<MRI(-)/cytology(-)
4545	432.853	22.97	0.55	0.829787	4.14	1	MRI(+)/cytology(-)<MRI(-)/cytology(-)
4548	433.276	7.88	0.55	0.829787	2.38	1	MRI(+)/cytology(-)>MRI(-)/cytology(-)
4696	453.229	8.8	0.55	0.829787	3.85	1	MRI(+)/cytology(-)<MRI(-)/cytology(-)
4701	453.232	8.5	0.55	0.829787	3.97	1	MRI(+)/cytology(-)<MRI(-)/cytology(-)
4763	461.311	8.65	0.55	0.829787	3.71	1	MRI(+)/cytology(-)<MRI(-)/cytology(-)
4815	476.305	8.94	0.55	0.829787	4.86	1	MRI(+)/cytology(-)<MRI(-)/cytology(-)
5236	523.272	8.64	0.55	0.829787	2.875	1	MRI(+)/cytology(-)<MRI(-)/cytology(-)
6102	702.393	8.75	0.55	0.829787	3.145	1	MRI(+)/cytology(-)<MRI(-)/cytology(-)
10	55.9364	23.74	0.95	0.425532	4.81	1	MRI(+)/cytology(-)>MRI(-)/cytology(-)
224	69.0337	2.16	0.95	0.425532	4.15	1	MRI(+)/cytology(-)>MRI(-)/cytology(-)
367	85.029	2.16	0.95	0.425532	4.62	1	MRI(+)/cytology(-)>MRI(-)/cytology(-)
516	99.9475	23.49	0.95	0.425532	5.105	1	MRI(+)/cytology(-)>MRI(-)/cytology(-)
804	107.085	1.88	0.95	0.425532	5.32	1	MRI(+)/cytology(-)>MRI(-)/cytology(-)
817	109.943	23.57	0.95	0.425532	5.325	1	MRI(+)/cytology(-)>MRI(-)/cytology(-)
859	112.955	23.52	0.95	0.425532	5.33	1	MRI(+)/cytology(-)>MRI(-)/cytology(-)
1493	148.058	2.06	0.95	0.425532	3.45	1	MRI(+)/cytology(-)>MRI(-)/cytology(-)
2205	217.105	16.09	0.95	0.425532	5.2	1	MRI(+)/cytology(-)>MRI(-)/cytology(-)
3511	327.2	8.08	0.95	0.425532	5.43	1	MRI(+)/cytology(-)<MRI(-)/cytology(-)
4023	372.258	8.15	0.95	0.425532	5.45	1	MRI(+)/cytology(-)<MRI(-)/cytology(-)
4414	418.287	8.15	0.95	0.425532	4.385	1	MRI(+)/cytology(-)<MRI(-)/cytology(-)
4571	434.285	9.85	0.95	0.425532	2.99	1	MRI(+)/cytology(-)<MRI(-)/cytology(-)
4869	479.242	8.65	0.95	0.425532	3.4	1	MRI(+)/cytology(-)<MRI(-)/cytology(-)
6027	669.767	22.98	0.95	0.425532	4.37	1	MRI(+)/cytology(-)<MRI(-)/cytology(-)
178	60.0463	18.21	0.8	0.574468	4.805	1	MRI(+)/cytology(-)>MRI(-)/cytology(-)
191	61.0418	2.06	0.8	0.574468	4.945	1	MRI(+)/cytology(-)>MRI(-)/cytology(-)
594	102.127	23.88	0.8	0.574468	5.54	1	MRI(+)/cytology(-)<MRI(-)/cytology(-)
690	102.129	23.24	0.8	0.574468	5.305	1	MRI(+)/cytology(-)<MRI(-)/cytology(-)
693	102.129	16.66	0.8	0.574468	5.705	1	MRI(+)/cytology(-)<MRI(-)/cytology(-)
1501	149.023	15	0.8	0.574468	4.85	1	MRI(+)/cytology(-)<MRI(-)/cytology(-)
2184	217.104	15.86	0.8	0.574468	4.695	1	MRI(+)/cytology(-)>MRI(-)/cytology(-)
2509	235.18	8.27	0.8	0.574468	3.54	1	MRI(+)/cytology(-)<MRI(-)/cytology(-)
2622	241.179	11.44	0.8	0.574468	3.57	1	MRI(+)/cytology(-)<MRI(-)/cytology(-)
2702	250.178	11.89	0.8	0.574468	4.14	1	MRI(+)/cytology(-)<MRI(-)/cytology(-)
2996	277.044	9.63	0.8	0.574468	2.85	1	MRI(+)/cytology(-)<MRI(-)/cytology(-)
3447	318.196	8.85	0.8	0.574468	3.38	1	MRI(+)/cytology(-)<MRI(-)/cytology(-)
3451	318.2	8.95	0.8	0.574468	3.28	1	MRI(+)/cytology(-)<MRI(-)/cytology(-)
4137	389.255	7.81	0.8	0.574468	2.68	1	MRI(+)/cytology(-)>MRI(-)/cytology(-)
4173	393.207	8.83	0.8	0.574468	4.44	1	MRI(+)/cytology(-)<MRI(-)/cytology(-)
4302	409.203	9.72	0.8	0.574468	3.86	1	MRI(+)/cytology(-)<MRI(-)/cytology(-)
5103	503.304	9.91	0.8	0.574468	3.99	1	MRI(+)/cytology(-)<MRI(-)/cytology(-)
5198	520.333	8.78	0.8	0.574468	4.865	1	MRI(+)/cytology(-)<MRI(-)/cytology(-)
5318	528.309	13.64	0.8	0.574468	3.29	1	MRI(+)/cytology(-)<MRI(-)/cytology(-)
5407	545.344	13.35	0.8	0.574468	3.53	1	MRI(+)/cytology(-)<MRI(-)/cytology(-)
5492	564.36	9.94	0.8	0.574468	4.28	1	MRI(+)/cytology(-)<MRI(-)/cytology(-)
5593	569.314	9.01	0.8	0.574468	4.43	1	MRI(+)/cytology(-)<MRI(-)/cytology(-)
5742	605.798	22.98	0.8	0.574468	4.53	1	MRI(+)/cytology(-)<MRI(-)/cytology(-)
5924	636.413	9.45	0.8	0.574468	2.71	1	MRI(+)/cytology(-)<MRI(-)/cytology(-)
5926	636.413	8.88	0.8	0.574468	3.425	1	MRI(+)/cytology(-)<MRI(-)/cytology(-)
559	102.126	16.61	0.65	0.723404	4.87	1	MRI(+)/cytology(-)<MRI(-)/cytology(-)
918	120.081	7.65	0.65	0.723404	3.31	1	MRI(+)/cytology(-)>MRI(-)/cytology(-)
1000	123.079	16.84	0.65	0.723404	4.35	1	MRI(+)/cytology(-)>MRI(-)/cytology(-)
1040	123.082	19.65	0.65	0.723404	4.81	1	MRI(+)/cytology(-)>MRI(-)/cytology(-)
2013	200.236	10	0.65	0.723404	4.65	0	MRI(+)/cytology(-)>MRI(-)/cytology(-)
2048	203.217	9.04	0.65	0.723404	3.61	1	MRI(+)/cytology(-)<MRI(-)/cytology(-)
2924	266.173	10.81	0.65	0.723404	4.22	1	MRI(+)/cytology(-)<MRI(-)/cytology(-)
3108	284.206	9.62	0.65	0.723404	3.47	1	MRI(+)/cytology(-)<MRI(-)/cytology(-)
4401	417.261	8.88	0.65	0.723404	3.18	1	MRI(+)/cytology(-)<MRI(-)/cytology(-)
4406	417.288	8.83	0.65	0.723404	3.38	1	MRI(+)/cytology(-)<MRI(-)/cytology(-)
4961	485.288	15.66	0.65	0.723404	4.39	1	MRI(+)/cytology(-)<MRI(-)/cytology(-)
5016	497.253	8.87	0.65	0.723404	3.67	1	MRI(+)/cytology(-)<MRI(-)/cytology(-)
5448	549.366	8.61	0.65	0.723404	3.095	0	MRI(+)/cytology(-)<MRI(-)/cytology(-)
6400	884.161	1.63	0.65	0.723404	4.655	1	MRI(+)/cytology(-)>MRI(-)/cytology(-)
169	59.0527	9.09	0.5	0.87234	5.275	1	MRI(+)/cytology(-)>MRI(-)/cytology(-)
1038	123.082	22.35	0.5	0.87234	4.68	1	MRI(+)/cytology(-)>MRI(-)/cytology(-)
2102	213.147	11.11	0.5	0.87234	4.76	1	MRI(+)/cytology(-)>MRI(-)/cytology(-)
2639	246.243	8.93	0.5	0.87234	5.57	1	MRI(+)/cytology(-)>MRI(-)/cytology(-)
3700	347.167	8.7	0.5	0.87234	3.2	1	MRI(+)/cytology(-)<MRI(-)/cytology(-)
4550	433.281	8.73	0.5	0.87234	3.925	1	MRI(+)/cytology(-)<MRI(-)/cytology(-)
4570	434.285	8.5	0.5	0.87234	3.05	1	MRI(+)/cytology(-)<MRI(-)/cytology(-)
4667	448.273	8.83	0.5	0.87234	3.55	1	MRI(+)/cytology(-)<MRI(-)/cytology(-)
4681	449.277	8.59	0.5	0.87234	2.8	1	MRI(+)/cytology(-)<MRI(-)/cytology(-)
4692	453.228	8.58	0.5	0.87234	3.88	1	MRI(+)/cytology(-)<MRI(-)/cytology(-)
4700	453.232	8.79	0.5	0.87234	3.855	1	MRI(+)/cytology(-)<MRI(-)/cytology(-)
5108	503.306	8.61	0.5	0.87234	4.565	1	MRI(+)/cytology(-)<MRI(-)/cytology(-)
5656	585.292	8.83	0.5	0.87234	2.085	1	MRI(+)/cytology(-)<MRI(-)/cytology(-)
210	68.995	24.07	0.9	0.468085	4.8	1	MRI(+)/cytology(-)>MRI(-)/cytology(-)
700	102.129	10.61	0.9	0.468085	5.52	1	MRI(+)/cytology(-)<MRI(-)/cytology(-)
803	107.085	1.32	0.9	0.468085	5.04	1	MRI(+)/cytology(-)>MRI(-)/cytology(-)
1186	124.087	8.41	0.9	0.468085	3.57	1	MRI(+)/cytology(-)>MRI(-)/cytology(-)
2716	254.06	9.79	0.9	0.468085	2.89	1	MRI(+)/cytology(-)<MRI(-)/cytology(-)
3228	298.351	11.55	0.9	0.468085	2.87	1	MRI(+)/cytology(-)>MRI(-)/cytology(-)
3232	299.22	13.51	0.9	0.468085	4.89	1	MRI(+)/cytology(-)>MRI(-)/cytology(-)
3563	329.235	8.58	0.9	0.468085	3.15	1	MRI(+)/cytology(-)<MRI(-)/cytology(-)
3683	345.229	8.07	0.9	0.468085	4.4	1	MRI(+)/cytology(-)<MRI(-)/cytology(-)
3807	351.2	9.13	0.9	0.468085	3.38	1	MRI(+)/cytology(-)>MRI(-)/cytology(-)
5168	512.505	14.22	0.9	0.468085	4.36	1	MRI(+)/cytology(-)>MRI(-)/cytology(-)
5453	549.37	9.36	0.9	0.468085	3.06	1	MRI(+)/cytology(-)<MRI(-)/cytology(-)
5610	570.322	8.89	0.9	0.468085	3.79	1	MRI(+)/cytology(-)<MRI(-)/cytology(-)
38	57.9366	23.02	0.75	0.617021	4.89	1	MRI(+)/cytology(-)>MRI(-)/cytology(-)
60	59.0515	8.57	0.75	0.617021	5.16	1	MRI(+)/cytology(-)>MRI(-)/cytology(-)
429	88.9323	23.84	0.75	0.617021	5.14	1	MRI(+)/cytology(-)>MRI(-)/cytology(-)
450	91.0138	22.98	0.75	0.617021	4.535	1	MRI(+)/cytology(-)>MRI(-)/cytology(-)
709	102.129	10.54	0.75	0.617021	5.22	1	MRI(+)/cytology(-)<MRI(-)/cytology(-)
914	120.08	8.96	0.75	0.617021	2.71	1	MRI(+)/cytology(-)>MRI(-)/cytology(-)
963	122.096	20.54	0.75	0.617021	4.255	1	MRI(+)/cytology(-)<MRI(-)/cytology(-)
1374	136.113	19.83	0.75	0.617021	3.98	1	MRI(+)/cytology(-)<MRI(-)/cytology(-)
1473	144.175	8.47	0.75	0.617021	2.61	1	MRI(+)/cytology(-)<MRI(-)/cytology(-)
2355	226.18	10.83	0.75	0.617021	3.69	1	MRI(+)/cytology(-)<MRI(-)/cytology(-)
2641	246.243	9.46	0.75	0.617021	4.13	1	MRI(+)/cytology(-)<MRI(-)/cytology(-)
3437	318.053	9.72	0.75	0.617021	2.49	1	MRI(+)/cytology(-)<MRI(-)/cytology(-)
3478	321.152	9.62	0.75	0.617021	4.05	1	MRI(+)/cytology(-)<MRI(-)/cytology(-)
3859	360.223	8.69	0.75	0.617021	3.67	1	MRI(+)/cytology(-)<MRI(-)/cytology(-)
4385	416.284	8.53	0.75	0.617021	3.875	1	MRI(+)/cytology(-)<MRI(-)/cytology(-)
4393	416.286	8.83	0.75	0.617021	4.06	1	MRI(+)/cytology(-)<MRI(-)/cytology(-)
4829	476.308	9.32	0.75	0.617021	4.83	1	MRI(+)/cytology(-)<MRI(-)/cytology(-)
5714	593.39	9.03	0.75	0.617021	2.815	1	MRI(+)/cytology(-)<MRI(-)/cytology(-)
5756	609.383	9.05	0.75	0.617021	3.2	1	MRI(+)/cytology(-)<MRI(-)/cytology(-)
6415	907.339	1.67	0.75	0.617021	5.09	1	MRI(+)/cytology(-)>MRI(-)/cytology(-)
6527	1077.79	1.66	0.75	0.617021	4.78	1	MRI(+)/cytology(-)>MRI(-)/cytology(-)
537	101.964	23.01	0.6	0.765957	4.84	1	MRI(+)/cytology(-)>MRI(-)/cytology(-)
1604	161.096	14.67	0.6	0.765957	3.93	1	MRI(+)/cytology(-)<MRI(-)/cytology(-)
2856	261.132	9.62	0.6	0.765957	4.41	1	MRI(+)/cytology(-)<MRI(-)/cytology(-)
3135	285.292	9.8	0.6	0.765957	4.53	1	MRI(+)/cytology(-)>MRI(-)/cytology(-)
3803	351.198	8	0.6	0.765957	2.945	1	MRI(+)/cytology(-)>MRI(-)/cytology(-)
4113	388.253	8.42	0.6	0.765957	4.49	1	MRI(+)/cytology(-)<MRI(-)/cytology(-)
4193	393.21	9.81	0.6	0.765957	4.33	1	MRI(+)/cytology(-)<MRI(-)/cytology(-)
4468	430.911	20.17	0.6	0.765957	3.43	1	MRI(+)/cytology(-)>MRI(-)/cytology(-)
4616	437.236	8.99	0.6	0.765957	4.53	1	MRI(+)/cytology(-)<MRI(-)/cytology(-)
5214	521.338	8.81	0.6	0.765957	3.81	1	MRI(+)/cytology(-)<MRI(-)/cytology(-)
5282	526.288	8.66	0.6	0.765957	4.19	1	MRI(+)/cytology(-)<MRI(-)/cytology(-)
5362	537.323	8.62	0.6	0.765957	2.455	1	MRI(+)/cytology(-)<MRI(-)/cytology(-)
512	98.9615	22.98	0.45	0.914894	5.065	1	MRI(+)/cytology(-)>MRI(-)/cytology(-)
3476	321.151	7.72	0.45	0.914894	3.025	1	MRI(+)/cytology(-)>MRI(-)/cytology(-)
3691	345.875	22.94	0.45	0.914894	4.49	1	MRI(+)/cytology(-)<MRI(-)/cytology(-)
3996	371.228	8.95	0.45	0.914894	3.94	1	MRI(+)/cytology(-)<MRI(-)/cytology(-)
4320	410.206	7.94	0.45	0.914894	2.83	1	MRI(+)/cytology(-)>MRI(-)/cytology(-)
4537	432.281	8.87	0.45	0.914894	4.69	1	MRI(+)/cytology(-)<MRI(-)/cytology(-)
4880	481.257	8.77	0.45	0.914894	4.62	1	MRI(+)/cytology(-)<MRI(-)/cytology(-)
5442	549.362	8.75	0.45	0.914894	3.31	1	MRI(+)/cytology(-)<MRI(-)/cytology(-)
5549	566.888	18.55	0.45	0.914894	1.515	0	MRI(+)/cytology(-)<MRI(-)/cytology(-)
6018	659.372	8.75	0.45	0.914894	2.6	1	MRI(+)/cytology(-)<MRI(-)/cytology(-)
26	56.0526	22.76	1	0.361702	4.16	1	MRI(+)/cytology(-)>MRI(-)/cytology(-)
339	82.0542	15.5	1	0.361702	2.86	1	MRI(+)/cytology(-)>MRI(-)/cytology(-)
3233	299.22	13.86	1	0.361702	3.67	1	MRI(+)/cytology(-)>MRI(-)/cytology(-)
4864	478.828	22.94	1	0.361702	4.97	1	MRI(+)/cytology(-)<MRI(-)/cytology(-)
1	53.0049	1.88	0.85	0.510638	5.15	1	MRI(+)/cytology(-)>MRI(-)/cytology(-)
98	59.0518	20.76	0.85	0.510638	4.985	1	MRI(+)/cytology(-)>MRI(-)/cytology(-)
189	61.031	1.87	0.85	0.510638	4.755	1	MRI(+)/cytology(-)>MRI(-)/cytology(-)
241	71.9514	23.07	0.85	0.510638	5.5	1	MRI(+)/cytology(-)>MRI(-)/cytology(-)
257	73.067	1.8	0.85	0.510638	4.85	1	MRI(+)/cytology(-)>MRI(-)/cytology(-)
316	82.0538	22.8	0.85	0.510638	3.13	1	MRI(+)/cytology(-)>MRI(-)/cytology(-)
497	97.933	23.48	0.85	0.510638	5.46	1	MRI(+)/cytology(-)>MRI(-)/cytology(-)
1533	155.973	23.56	0.85	0.510638	5.2	1	MRI(+)/cytology(-)>MRI(-)/cytology(-)
2923	266.173	10.83	0.85	0.510638	3.7	1	MRI(+)/cytology(-)<MRI(-)/cytology(-)
3015	277.178	12.87	0.85	0.510638	4.36	1	MRI(+)/cytology(-)>MRI(-)/cytology(-)
3470	320.257	13.6	0.85	0.510638	3.78	1	MRI(+)/cytology(-)>MRI(-)/cytology(-)
4019	372.258	8.64	0.85	0.510638	3.575	1	MRI(+)/cytology(-)<MRI(-)/cytology(-)
4183	393.209	8.61	0.85	0.510638	4.51	1	MRI(+)/cytology(-)<MRI(-)/cytology(-)
4319	410.206	8.64	0.85	0.510638	3.14	1	MRI(+)/cytology(-)<MRI(-)/cytology(-)
4609	437.235	8.67	0.85	0.510638	4.73	1	MRI(+)/cytology(-)<MRI(-)/cytology(-)
5360	536.331	8.68	0.85	0.510638	3.53	1	MRI(+)/cytology(-)<MRI(-)/cytology(-)
6002	657.375	9.48	0.85	0.510638	3.275	1	MRI(+)/cytology(-)<MRI(-)/cytology(-)
362	84.9607	22.97	0.7	0.659574	6.08	1	MRI(+)/cytology(-)>MRI(-)/cytology(-)
445	90.9766	1.75	0.7	0.659574	3.705	1	MRI(+)/cytology(-)>MRI(-)/cytology(-)
1010	123.079	21.89	0.7	0.659574	4.09	1	MRI(+)/cytology(-)>MRI(-)/cytology(-)
1611	163.116	1.68	0.7	0.659574	3.815	1	MRI(+)/cytology(-)>MRI(-)/cytology(-)
3250	302.142	15	0.7	0.659574	4.22	1	MRI(+)/cytology(-)<MRI(-)/cytology(-)
3498	324.286	10.49	0.7	0.659574	3.965	1	MRI(+)/cytology(-)<MRI(-)/cytology(-)
4066	380.819	23.03	0.7	0.659574	4.81	1	MRI(+)/cytology(-)<MRI(-)/cytology(-)
4484	430.913	1.66	0.7	0.659574	6.36	1	MRI(+)/cytology(-)>MRI(-)/cytology(-)
5049	498.899	20.54	0.7	0.659574	1.98	0	MRI(+)/cytology(-)<MRI(-)/cytology(-)
5213	521.337	8.78	0.7	0.659574	3.87	1	MRI(+)/cytology(-)<MRI(-)/cytology(-)
5303	527.294	13.3	0.7	0.659574	4	1	MRI(+)/cytology(-)<MRI(-)/cytology(-)
5578	568.337	13.3	0.7	0.659574	3.185	1	MRI(+)/cytology(-)<MRI(-)/cytology(-)
5650	585.268	9.59	0.7	0.659574	3.06	1	MRI(+)/cytology(-)>MRI(-)/cytology(-)
6179	736.858	1.71	0.7	0.659574	5.57	1	MRI(+)/cytology(-)>MRI(-)/cytology(-)
6278	804.844	1.64	0.7	0.659574	5.61	1	MRI(+)/cytology(-)>MRI(-)/cytology(-)
625	102.128	20.92	0.55	0.808511	5.28	1	MRI(+)/cytology(-)<MRI(-)/cytology(-)
860	112.956	23.57	0.55	0.808511	5.51	1	MRI(+)/cytology(-)>MRI(-)/cytology(-)
1254	127.093	8.45	0.55	0.808511	3.49	1	MRI(+)/cytology(-)>MRI(-)/cytology(-)
1852	185.117	9.81	0.55	0.808511	3.87	1	MRI(+)/cytology(-)<MRI(-)/cytology(-)
1904	190.097	9.66	0.55	0.808511	2.83	1	MRI(+)/cytology(-)<MRI(-)/cytology(-)
1921	192.137	7.46	0.55	0.808511	3.47	1	MRI(+)/cytology(-)>MRI(-)/cytology(-)
2544	239.147	7.72	0.55	0.808511	4.14	1	MRI(+)/cytology(-)>MRI(-)/cytology(-)
3448	318.197	8.82	0.55	0.808511	3.27	1	MRI(+)/cytology(-)<MRI(-)/cytology(-)
3647	340.18	8.87	0.55	0.808511	3.34	1	MRI(+)/cytology(-)<MRI(-)/cytology(-)
3650	340.208	8.92	0.55	0.808511	3.29	1	MRI(+)/cytology(-)<MRI(-)/cytology(-)
3704	347.168	8.46	0.55	0.808511	3.45	1	MRI(+)/cytology(-)<MRI(-)/cytology(-)
4007	372.23	9.8	0.55	0.808511	3.615	1	MRI(+)/cytology(-)<MRI(-)/cytology(-)
4132	388.257	8.95	0.55	0.808511	4.06	1	MRI(+)/cytology(-)<MRI(-)/cytology(-)
4369	415.254	8.74	0.55	0.808511	4.215	1	MRI(+)/cytology(-)<MRI(-)/cytology(-)
4721	459.276	9.03	0.55	0.808511	4.12	1	MRI(+)/cytology(-)<MRI(-)/cytology(-)
4723	459.277	8.75	0.55	0.808511	4.35	1	MRI(+)/cytology(-)<MRI(-)/cytology(-)
4725	459.278	8.94	0.55	0.808511	4.33	1	MRI(+)/cytology(-)<MRI(-)/cytology(-)
4905	481.262	8.94	0.55	0.808511	4.71	1	MRI(+)/cytology(-)<MRI(-)/cytology(-)
5144	505.343	8.69	0.55	0.808511	3.6	1	MRI(+)/cytology(-)<MRI(-)/cytology(-)
5199	520.333	8.66	0.55	0.808511	4.86	1	MRI(+)/cytology(-)<MRI(-)/cytology(-)
5350	536.321	8.67	0.55	0.808511	3.355	1	MRI(+)/cytology(-)<MRI(-)/cytology(-)
5396	542.283	8.68	0.55	0.808511	3.1	1	MRI(+)/cytology(-)<MRI(-)/cytology(-)
5623	572.317	8.6	0.55	0.808511	2.31	0	MRI(+)/cytology(-)<MRI(-)/cytology(-)
2312	219.215	8.18	0.4	0.957447	2.91	1	MRI(+)/cytology(-)>MRI(-)/cytology(-)
237	71.9307	23.51	0.95	0.404255	5.37	1	MRI(+)/cytology(-)>MRI(-)/cytology(-)
329	82.054	16.34	0.95	0.404255	3.14	1	MRI(+)/cytology(-)>MRI(-)/cytology(-)
1285	130.16	7.77	0.95	0.404255	4.38	1	MRI(+)/cytology(-)<MRI(-)/cytology(-)
1434	140.995	23.03	0.95	0.404255	4.81	1	MRI(+)/cytology(-)>MRI(-)/cytology(-)
1500	149.023	14.74	0.95	0.404255	5.46	1	MRI(+)/cytology(-)>MRI(-)/cytology(-)
1910	191.039	2.11	0.95	0.404255	4.265	1	MRI(+)/cytology(-)>MRI(-)/cytology(-)
2778	259.115	7.94	0.95	0.404255	4.495	1	MRI(+)/cytology(-)<MRI(-)/cytology(-)
3096	284.176	8.01	0.95	0.404255	3.805	1	MRI(+)/cytology(-)<MRI(-)/cytology(-)
3790	350.187	8.2	0.95	0.404255	5.055	1	MRI(+)/cytology(-)<MRI(-)/cytology(-)
3969	369.352	15.34	0.95	0.404255	3.78	1	MRI(+)/cytology(-)>MRI(-)/cytology(-)
5164	510.781	22.98	0.95	0.404255	4.53	1	MRI(+)/cytology(-)<MRI(-)/cytology(-)
6205	770.848	22.7	0.95	0.404255	4.575	1	MRI(+)/cytology(-)<MRI(-)/cytology(-)
235	71.9303	23.67	0.8	0.553191	4.985	1	MRI(+)/cytology(-)>MRI(-)/cytology(-)
427	88.0756	19.12	0.8	0.553191	4.38	1	MRI(+)/cytology(-)>MRI(-)/cytology(-)
778	104.108	1.75	0.8	0.553191	3.96	1	MRI(+)/cytology(-)>MRI(-)/cytology(-)
883	115.023	1.33	0.8	0.553191	4.13	1	MRI(+)/cytology(-)>MRI(-)/cytology(-)
1056	123.099	22.56	0.8	0.553191	4.51	1	MRI(+)/cytology(-)>MRI(-)/cytology(-)
1467	144.174	8.7	0.8	0.553191	2.15	0	MRI(+)/cytology(-)<MRI(-)/cytology(-)
1515	153.066	7.42	0.8	0.553191	3.97	1	MRI(+)/cytology(-)>MRI(-)/cytology(-)
2719	254.248	15.32	0.8	0.553191	3.71	1	MRI(+)/cytology(-)>MRI(-)/cytology(-)
2745	256.263	16.61	0.8	0.553191	4.76	1	MRI(+)/cytology(-)<MRI(-)/cytology(-)
2992	276.281	10.22	0.8	0.553191	3.28	0	MRI(+)/cytology(-)<MRI(-)/cytology(-)
3138	286.199	8.6	0.8	0.553191	2.15	0	MRI(+)/cytology(-)<MRI(-)/cytology(-)
3435	318.049	9.69	0.8	0.553191	2.525	1	MRI(+)/cytology(-)<MRI(-)/cytology(-)
3597	337.104	13.16	0.8	0.553191	4.69	1	MRI(+)/cytology(-)>MRI(-)/cytology(-)
4294	408.409	8.25	0.8	0.553191	1.485	0	MRI(+)/cytology(-)>MRI(-)/cytology(-)
4378	416.258	9.12	0.8	0.553191	4	1	MRI(+)/cytology(-)<MRI(-)/cytology(-)
4568	434.284	8.74	0.8	0.553191	2.98	1	MRI(+)/cytology(-)<MRI(-)/cytology(-)
4600	437.234	8.74	0.8	0.553191	4.65	1	MRI(+)/cytology(-)<MRI(-)/cytology(-)
4617	437.236	8.88	0.8	0.553191	4.67	1	MRI(+)/cytology(-)<MRI(-)/cytology(-)
4630	438.194	12.67	0.8	0.553191	4.66	1	MRI(+)/cytology(-)<MRI(-)/cytology(-)
4783	463.13	16.1	0.8	0.553191	4.46	1	MRI(+)/cytology(-)>MRI(-)/cytology(-)
5745	608.381	8.5	0.8	0.553191	6.095	1	MRI(+)/cytology(-)<MRI(-)/cytology(-)
6038	680.435	8.68	0.8	0.553191	4.97	1	MRI(+)/cytology(-)<MRI(-)/cytology(-)
56	59.0515	8.43	0.65	0.702128	5.105	1	MRI(+)/cytology(-)>MRI(-)/cytology(-)
711	102.129	22.24	0.65	0.702128	5.69	1	MRI(+)/cytology(-)<MRI(-)/cytology(-)
1259	127.095	8.18	0.65	0.702128	3.15	1	MRI(+)/cytology(-)>MRI(-)/cytology(-)
1290	130.962	23.01	0.65	0.702128	4.55	1	MRI(+)/cytology(-)>MRI(-)/cytology(-)
1518	154.058	2.02	0.65	0.702128	4.41	1	MRI(+)/cytology(-)>MRI(-)/cytology(-)
3405	309.203	15.69	0.65	0.702128	4.96	1	MRI(+)/cytology(-)>MRI(-)/cytology(-)
3663	343.296	11.18	0.65	0.702128	4.1	1	MRI(+)/cytology(-)>MRI(-)/cytology(-)
3672	344.228	8.79	0.65	0.702128	4.05	1	MRI(+)/cytology(-)<MRI(-)/cytology(-)
3779	350.116	7.98	0.65	0.702128	2.635	1	MRI(+)/cytology(-)>MRI(-)/cytology(-)
4030	372.261	9.16	0.65	0.702128	3.49	1	MRI(+)/cytology(-)<MRI(-)/cytology(-)
4440	426.177	8.45	0.65	0.702128	2.425	0	MRI(+)/cytology(-)<MRI(-)/cytology(-)
4462	430.865	22.97	0.65	0.702128	4.32	1	MRI(+)/cytology(-)<MRI(-)/cytology(-)
4608	437.235	9.84	0.65	0.702128	4.6	1	MRI(+)/cytology(-)<MRI(-)/cytology(-)
4716	456.065	11.11	0.65	0.702128	2.395	1	MRI(+)/cytology(-)>MRI(-)/cytology(-)
4984	492.304	8.65	0.65	0.702128	3.665	1	MRI(+)/cytology(-)<MRI(-)/cytology(-)
5753	608.388	9.96	0.65	0.702128	3.84	1	MRI(+)/cytology(-)<MRI(-)/cytology(-)
5757	609.384	8.88	0.65	0.702128	3.29	1	MRI(+)/cytology(-)<MRI(-)/cytology(-)
5800	614.341	9.06	0.65	0.702128	3.07	1	MRI(+)/cytology(-)<MRI(-)/cytology(-)
6431	924.769	19.5	0.65	0.702128	3.585	1	MRI(+)/cytology(-)>MRI(-)/cytology(-)
177	60.0462	17.64	0.5	0.851064	4.82	1	MRI(+)/cytology(-)>MRI(-)/cytology(-)
1046	123.098	18.7	0.5	0.851064	4.55	1	MRI(+)/cytology(-)>MRI(-)/cytology(-)
1237	126.09	8.45	0.5	0.851064	3.305	1	MRI(+)/cytology(-)>MRI(-)/cytology(-)
1686	169.035	4.78	0.5	0.851064	4.94	1	MRI(+)/cytology(-)>MRI(-)/cytology(-)
1687	169.035	5.04	0.5	0.851064	4.265	1	MRI(+)/cytology(-)>MRI(-)/cytology(-)
1689	169.036	4.99	0.5	0.851064	4.115	1	MRI(+)/cytology(-)>MRI(-)/cytology(-)
1950	194.097	8.18	0.5	0.851064	3.32	1	MRI(+)/cytology(-)>MRI(-)/cytology(-)
2120	214.253	20.55	0.5	0.851064	3.215	1	MRI(+)/cytology(-)<MRI(-)/cytology(-)
4411	417.288	8.68	0.5	0.851064	3.39	1	MRI(+)/cytology(-)<MRI(-)/cytology(-)
4522	432.278	8.42	0.5	0.851064	4.985	1	MRI(+)/cytology(-)<MRI(-)/cytology(-)
4818	476.306	8.56	0.5	0.851064	4.97	1	MRI(+)/cytology(-)<MRI(-)/cytology(-)
5274	525.289	8.76	0.5	0.851064	4.885	1	MRI(+)/cytology(-)<MRI(-)/cytology(-)
5299	527.293	8.66	0.5	0.851064	3.515	1	MRI(+)/cytology(-)<MRI(-)/cytology(-)
5511	566.362	9.94	0.5	0.851064	2.22	1	MRI(+)/cytology(-)<MRI(-)/cytology(-)
5991	657.361	8.88	0.5	0.851064	3.37	1	MRI(+)/cytology(-)<MRI(-)/cytology(-)
2412	227.175	8.28	0.35	1	3.235	1	MRI(+)/cytology(-)<MRI(-)/cytology(-)
4714	455.178	7.99	0.35	1	3.165	1	MRI(+)/cytology(-)>MRI(-)/cytology(-)
276	81.9381	23.85	0.9	0.446809	5.21	1	MRI(+)/cytology(-)>MRI(-)/cytology(-)
277	81.9381	24.06	0.9	0.446809	4.785	1	MRI(+)/cytology(-)>MRI(-)/cytology(-)
320	82.0539	17.55	0.9	0.446809	2.54	1	MRI(+)/cytology(-)>MRI(-)/cytology(-)
357	84.9466	23.08	0.9	0.446809	4.35	1	MRI(+)/cytology(-)>MRI(-)/cytology(-)
462	91.0547	2.2	0.9	0.446809	4.77	1	MRI(+)/cytology(-)>MRI(-)/cytology(-)
1288	130.958	23.61	0.9	0.446809	4.8	1	MRI(+)/cytology(-)>MRI(-)/cytology(-)
1478	145.034	1.38	0.9	0.446809	4.47	1	MRI(+)/cytology(-)<MRI(-)/cytology(-)
1489	147.065	2.19	0.9	0.446809	3.24	1	MRI(+)/cytology(-)>MRI(-)/cytology(-)
1928	192.138	7.74	0.9	0.446809	3.585	1	MRI(+)/cytology(-)<MRI(-)/cytology(-)
1943	194.078	8.68	0.9	0.446809	2.6	1	MRI(+)/cytology(-)>MRI(-)/cytology(-)
2620	241.178	10.75	0.9	0.446809	4.93	1	MRI(+)/cytology(-)<MRI(-)/cytology(-)
2714	254.059	9.73	0.9	0.446809	2.935	1	MRI(+)/cytology(-)<MRI(-)/cytology(-)
3130	285.21	8.03	0.9	0.446809	4.27	1	MRI(+)/cytology(-)<MRI(-)/cytology(-)
3186	295.193	13.1	0.9	0.446809	4.28	1	MRI(+)/cytology(-)>MRI(-)/cytology(-)
3230	299.161	14.4	0.9	0.446809	4.43	1	MRI(+)/cytology(-)>MRI(-)/cytology(-)
3805	351.198	8.04	0.9	0.446809	4.6	1	MRI(+)/cytology(-)<MRI(-)/cytology(-)
3955	366.18	8.04	0.9	0.446809	4.66	1	MRI(+)/cytology(-)<MRI(-)/cytology(-)
4106	385.292	15.8	0.9	0.446809	4.785	1	MRI(+)/cytology(-)>MRI(-)/cytology(-)
4392	416.285	8.2	0.9	0.446809	5.82	1	MRI(+)/cytology(-)<MRI(-)/cytology(-)
4636	438.238	8.65	0.9	0.446809	4.175	1	MRI(+)/cytology(-)<MRI(-)/cytology(-)
4859	478.314	8.69	0.9	0.446809	3.38	1	MRI(+)/cytology(-)<MRI(-)/cytology(-)
5110	503.307	8.78	0.9	0.446809	4.44	1	MRI(+)/cytology(-)<MRI(-)/cytology(-)
5131	504.339	8.33	0.9	0.446809	6.13	1	MRI(+)/cytology(-)<MRI(-)/cytology(-)
5433	548.362	8.36	0.9	0.446809	6.04	1	MRI(+)/cytology(-)<MRI(-)/cytology(-)
5488	564.357	9.23	0.9	0.446809	4.55	1	MRI(+)/cytology(-)<MRI(-)/cytology(-)
77	59.0516	22.69	0.75	0.595745	4.69	1	MRI(+)/cytology(-)>MRI(-)/cytology(-)
186	61.0307	0.07	0.75	0.595745	4.75	1	MRI(+)/cytology(-)>MRI(-)/cytology(-)
206	68.9949	24.03	0.75	0.595745	4.82	1	MRI(+)/cytology(-)>MRI(-)/cytology(-)
414	86.0972	2.3	0.75	0.595745	2.47	1	MRI(+)/cytology(-)>MRI(-)/cytology(-)
499	97.9519	23.03	0.75	0.595745	4.83	1	MRI(+)/cytology(-)>MRI(-)/cytology(-)
572	102.127	11.78	0.75	0.595745	5.335	1	MRI(+)/cytology(-)<MRI(-)/cytology(-)
1064	123.099	19.32	0.75	0.595745	4.74	1	MRI(+)/cytology(-)>MRI(-)/cytology(-)
1491	147.077	9.62	0.75	0.595745	3.39	1	MRI(+)/cytology(-)<MRI(-)/cytology(-)
1900	190.088	8.17	0.75	0.595745	2.47	0	MRI(+)/cytology(-)>MRI(-)/cytology(-)
2004	199.94	22.9	0.75	0.595745	4.72	1	MRI(+)/cytology(-)<MRI(-)/cytology(-)
2011	200.202	13.84	0.75	0.595745	3.67	1	MRI(+)/cytology(-)<MRI(-)/cytology(-)
2672	247.247	9.46	0.75	0.595745	3.37	1	MRI(+)/cytology(-)<MRI(-)/cytology(-)
2755	258.278	10.47	0.75	0.595745	5.08	1	MRI(+)/cytology(-)>MRI(-)/cytology(-)
3219	297.074	9.69	0.75	0.595745	3.34	1	MRI(+)/cytology(-)<MRI(-)/cytology(-)
3454	318.299	10.25	0.75	0.595745	2.76	1	MRI(+)/cytology(-)<MRI(-)/cytology(-)
3905	362.927	21.92	0.75	0.595745	2.28	1	MRI(+)/cytology(-)<MRI(-)/cytology(-)
3920	363.2	8.98	0.75	0.595745	3.02	1	MRI(+)/cytology(-)<MRI(-)/cytology(-)
4027	372.26	8.57	0.75	0.595745	4.005	1	MRI(+)/cytology(-)<MRI(-)/cytology(-)
4448	427.213	10.82	0.75	0.595745	4.71	1	MRI(+)/cytology(-)>MRI(-)/cytology(-)
4585	437.191	12.99	0.75	0.595745	4.68	1	MRI(+)/cytology(-)<MRI(-)/cytology(-)
5100	503.297	13.35	0.75	0.595745	4.34	1	MRI(+)/cytology(-)<MRI(-)/cytology(-)
5142	505.341	8.92	0.75	0.595745	3.15	1	MRI(+)/cytology(-)<MRI(-)/cytology(-)
5432	548.362	8.69	0.75	0.595745	4.21	1	MRI(+)/cytology(-)<MRI(-)/cytology(-)
5457	550.366	8.78	0.75	0.595745	2.48	1	MRI(+)/cytology(-)<MRI(-)/cytology(-)
5495	565.359	9.95	0.75	0.595745	3.47	1	MRI(+)/cytology(-)<MRI(-)/cytology(-)
5661	585.305	9.87	0.75	0.595745	2.99	1	MRI(+)/cytology(-)<MRI(-)/cytology(-)
5717	593.395	8.73	0.75	0.595745	2.705	0	MRI(+)/cytology(-)<MRI(-)/cytology(-)
5739	604.79	22.93	0.75	0.595745	5.38	1	MRI(+)/cytology(-)<MRI(-)/cytology(-)
6480	1008.8	1.71	0.75	0.595745	5.49	1	MRI(+)/cytology(-)>MRI(-)/cytology(-)
419	87.9244	24.1	0.6	0.744681	4.96	1	MRI(+)/cytology(-)>MRI(-)/cytology(-)
1243	126.091	8.98	0.6	0.744681	2.86	1	MRI(+)/cytology(-)>MRI(-)/cytology(-)
1252	127.038	2.09	0.6	0.744681	4.78	1	MRI(+)/cytology(-)>MRI(-)/cytology(-)
1261	127.095	8.17	0.6	0.744681	3.35	1	MRI(+)/cytology(-)>MRI(-)/cytology(-)
1526	154.086	8.42	0.6	0.744681	3.105	1	MRI(+)/cytology(-)>MRI(-)/cytology(-)
1812	177.126	9.84	0.6	0.744681	3.91	1	MRI(+)/cytology(-)<MRI(-)/cytology(-)
2327	222.868	23	0.6	0.744681	4.97	1	MRI(+)/cytology(-)<MRI(-)/cytology(-)
3036	279.095	11.68	0.6	0.744681	4.58	1	MRI(+)/cytology(-)<MRI(-)/cytology(-)
3499	325.111	2.09	0.6	0.744681	5.115	1	MRI(+)/cytology(-)>MRI(-)/cytology(-)
3867	362.189	8.92	0.6	0.744681	3.16	1	MRI(+)/cytology(-)<MRI(-)/cytology(-)
3918	363.2	8.17	0.6	0.744681	3.035	1	MRI(+)/cytology(-)>MRI(-)/cytology(-)
4272	402.356	11.29	0.6	0.744681	3.84	1	MRI(+)/cytology(-)<MRI(-)/cytology(-)
4285	404.25	8.77	0.6	0.744681	3.59	1	MRI(+)/cytology(-)<MRI(-)/cytology(-)
4388	416.285	8.5	0.6	0.744681	4.49	1	MRI(+)/cytology(-)<MRI(-)/cytology(-)
4513	431.173	8.29	0.6	0.744681	2.11	0	MRI(+)/cytology(-)<MRI(-)/cytology(-)
4740	460.306	8.63	0.6	0.744681	3.855	0	MRI(+)/cytology(-)<MRI(-)/cytology(-)
5096	501.173	10.8	0.6	0.744681	2.04	0	MRI(+)/cytology(-)>MRI(-)/cytology(-)
5225	522.338	8.61	0.6	0.744681	3.375	1	MRI(+)/cytology(-)<MRI(-)/cytology(-)
5451	549.369	8.68	0.6	0.744681	3.54	1	MRI(+)/cytology(-)<MRI(-)/cytology(-)
5500	565.362	8.84	0.6	0.744681	3.565	1	MRI(+)/cytology(-)<MRI(-)/cytology(-)
5589	569.314	8.79	0.6	0.744681	4.38	1	MRI(+)/cytology(-)<MRI(-)/cytology(-)
5892	634.876	19.52	0.6	0.744681	1.9	0	MRI(+)/cytology(-)>MRI(-)/cytology(-)
6126	702.862	1.67	0.6	0.744681	6.39	1	MRI(+)/cytology(-)>MRI(-)/cytology(-)
6152	702.869	22.73	0.6	0.744681	3.41	1	MRI(+)/cytology(-)<MRI(-)/cytology(-)
6181	737.357	1.64	0.6	0.744681	5.06	1	MRI(+)/cytology(-)>MRI(-)/cytology(-)
238	71.9308	23.44	0.45	0.893617	5.13	1	MRI(+)/cytology(-)>MRI(-)/cytology(-)
493	91.0562	21.99	0.45	0.893617	5.425	1	MRI(+)/cytology(-)>MRI(-)/cytology(-)
683	102.129	22.53	0.45	0.893617	5.07	1	MRI(+)/cytology(-)<MRI(-)/cytology(-)
725	102.129	22.37	0.45	0.893617	5.015	1	MRI(+)/cytology(-)<MRI(-)/cytology(-)
743	102.129	22.31	0.45	0.893617	5.42	1	MRI(+)/cytology(-)<MRI(-)/cytology(-)
1241	126.091	8.63	0.45	0.893617	3.155	1	MRI(+)/cytology(-)>MRI(-)/cytology(-)
1242	126.091	8.66	0.45	0.893617	3.18	1	MRI(+)/cytology(-)>MRI(-)/cytology(-)
1646	166.086	8.96	0.45	0.893617	3.3	1	MRI(+)/cytology(-)<MRI(-)/cytology(-)
1688	169.035	4.86	0.45	0.893617	4.555	1	MRI(+)/cytology(-)>MRI(-)/cytology(-)
2033	202.215	10.13	0.45	0.893617	3.47	1	MRI(+)/cytology(-)>MRI(-)/cytology(-)
2152	215.127	8.3	0.45	0.893617	3.87	1	MRI(+)/cytology(-)>MRI(-)/cytology(-)
2299	219.017	3.84	0.45	0.893617	5.02	1	MRI(+)/cytology(-)>MRI(-)/cytology(-)
2319	220.07	8.82	0.45	0.893617	2.27	1	MRI(+)/cytology(-)<MRI(-)/cytology(-)
2518	238.079	9.1	0.45	0.893617	2.53	1	MRI(+)/cytology(-)>MRI(-)/cytology(-)
2730	255.065	8.02	0.45	0.893617	2.85	1	MRI(+)/cytology(-)>MRI(-)/cytology(-)
2972	275.139	8	0.45	0.893617	3.19	1	MRI(+)/cytology(-)>MRI(-)/cytology(-)
3951	365.84	22.98	0.45	0.893617	4.41	1	MRI(+)/cytology(-)<MRI(-)/cytology(-)
4131	388.256	8.83	0.45	0.893617	4.345	1	MRI(+)/cytology(-)<MRI(-)/cytology(-)
4581	435.219	8.57	0.45	0.893617	3.155	1	MRI(+)/cytology(-)<MRI(-)/cytology(-)
5410	547.329	8.72	0.45	0.893617	3.995	1	MRI(+)/cytology(-)<MRI(-)/cytology(-)
5642	581.351	8.63	0.45	0.893617	2.435	0	MRI(+)/cytology(-)<MRI(-)/cytology(-)
5644	581.353	8.8	0.45	0.893617	1.73	0	MRI(+)/cytology(-)<MRI(-)/cytology(-)
5721	594.393	8.68	0.45	0.893617	1.835	0	MRI(+)/cytology(-)<MRI(-)/cytology(-)
280	81.9384	23.75	1	0.340426	5.29	1	MRI(+)/cytology(-)>MRI(-)/cytology(-)
305	82.0536	17.98	1	0.340426	2.92	1	MRI(+)/cytology(-)>MRI(-)/cytology(-)
308	82.0537	17.6	1	0.340426	2.91	1	MRI(+)/cytology(-)>MRI(-)/cytology(-)
1547	158.89	23	1	0.340426	4.49	1	MRI(+)/cytology(-)<MRI(-)/cytology(-)
4512	431.166	7.74	1	0.340426	2.85	1	MRI(+)/cytology(-)<MRI(-)/cytology(-)
4998	494.803	22.94	1	0.340426	4.91	1	MRI(+)/cytology(-)<MRI(-)/cytology(-)
93	59.0517	21.98	0.85	0.489362	5.345	1	MRI(+)/cytology(-)>MRI(-)/cytology(-)
192	61.0432	2.1	0.85	0.489362	5.175	1	MRI(+)/cytology(-)>MRI(-)/cytology(-)
432	88.9325	23.44	0.85	0.489362	5.71	1	MRI(+)/cytology(-)>MRI(-)/cytology(-)
442	90.9754	1.53	0.85	0.489362	4.31	1	MRI(+)/cytology(-)>MRI(-)/cytology(-)
448	90.9779	1.54	0.85	0.489362	4.44	1	MRI(+)/cytology(-)>MRI(-)/cytology(-)
1600	161.095	14.38	0.85	0.489362	4.91	1	MRI(+)/cytology(-)>MRI(-)/cytology(-)
2611	240.18	7.83	0.85	0.489362	3.31	1	MRI(+)/cytology(-)>MRI(-)/cytology(-)
3690	345.875	22.92	0.85	0.489362	4.75	1	MRI(+)/cytology(-)<MRI(-)/cytology(-)
3710	348.868	22.97	0.85	0.489362	4.85	1	MRI(+)/cytology(-)<MRI(-)/cytology(-)
3935	365.136	14.67	0.85	0.489362	4.525	1	MRI(+)/cytology(-)<MRI(-)/cytology(-)
5140	505.341	8.34	0.85	0.489362	5.435	1	MRI(+)/cytology(-)<MRI(-)/cytology(-)
5170	512.773	23.02	0.85	0.489362	4.37	1	MRI(+)/cytology(-)<MRI(-)/cytology(-)
5306	527.3	9.91	0.85	0.489362	3.17	1	MRI(+)/cytology(-)<MRI(-)/cytology(-)
5352	536.323	8.76	0.85	0.489362	3.45	1	MRI(+)/cytology(-)<MRI(-)/cytology(-)
5355	536.327	8.69	0.85	0.489362	3.505	1	MRI(+)/cytology(-)<MRI(-)/cytology(-)
5695	592.386	9.1	0.85	0.489362	3.42	1	MRI(+)/cytology(-)<MRI(-)/cytology(-)
5701	592.389	8.73	0.85	0.489362	4.075	1	MRI(+)/cytology(-)<MRI(-)/cytology(-)
5834	624.379	8.43	0.85	0.489362	4.59	1	MRI(+)/cytology(-)<MRI(-)/cytology(-)
5940	637.418	8.92	0.85	0.489362	2.725	1	MRI(+)/cytology(-)<MRI(-)/cytology(-)
6324	853.722	21.01	0.85	0.489362	3.175	1	MRI(+)/cytology(-)>MRI(-)/cytology(-)
197	67.024	22.9	0.7	0.638298	4.465	1	MRI(+)/cytology(-)>MRI(-)/cytology(-)
422	87.9256	24.13	0.7	0.638298	4.87	1	MRI(+)/cytology(-)>MRI(-)/cytology(-)
868	114.066	1.74	0.7	0.638298	4.9	1	MRI(+)/cytology(-)>MRI(-)/cytology(-)
896	118.087	2.34	0.7	0.638298	4.07	1	MRI(+)/cytology(-)>MRI(-)/cytology(-)
1610	163.075	10.39	0.7	0.638298	3.56	1	MRI(+)/cytology(-)<MRI(-)/cytology(-)
2739	255.944	22.93	0.7	0.638298	4.94	1	MRI(+)/cytology(-)>MRI(-)/cytology(-)
3288	305.156	7.82	0.7	0.638298	3.01	1	MRI(+)/cytology(-)>MRI(-)/cytology(-)
3536	328.232	8.82	0.7	0.638298	3.8	1	MRI(+)/cytology(-)<MRI(-)/cytology(-)
4209	393.286	12.59	0.7	0.638298	4.67	1	MRI(+)/cytology(-)<MRI(-)/cytology(-)
4304	409.204	8.98	0.7	0.638298	3.95	1	MRI(+)/cytology(-)<MRI(-)/cytology(-)
4528	432.279	9.12	0.7	0.638298	4.74	1	MRI(+)/cytology(-)<MRI(-)/cytology(-)
5204	520.339	13.35	0.7	0.638298	4.93	1	MRI(+)/cytology(-)<MRI(-)/cytology(-)
5493	564.36	8.73	0.7	0.638298	4.755	1	MRI(+)/cytology(-)<MRI(-)/cytology(-)
5505	566.319	13.35	0.7	0.638298	3.61	1	MRI(+)/cytology(-)<MRI(-)/cytology(-)
5794	613.346	9.27	0.7	0.638298	3.91	1	MRI(+)/cytology(-)<MRI(-)/cytology(-)
70	59.0516	9.11	0.55	0.787234	5.04	1	MRI(+)/cytology(-)>MRI(-)/cytology(-)
1888	188.9	22.98	0.55	0.787234	5.15	1	MRI(+)/cytology(-)<MRI(-)/cytology(-)
2194	217.104	23.11	0.55	0.787234	4.34	1	MRI(+)/cytology(-)<MRI(-)/cytology(-)
2995	277.043	9.79	0.55	0.787234	2.56	1	MRI(+)/cytology(-)<MRI(-)/cytology(-)
3444	318.168	8.84	0.55	0.787234	3.69	1	MRI(+)/cytology(-)<MRI(-)/cytology(-)
3552	329.188	8.77	0.55	0.787234	3.675	1	MRI(+)/cytology(-)<MRI(-)/cytology(-)
3863	360.224	8.35	0.55	0.787234	3.41	1	MRI(+)/cytology(-)<MRI(-)/cytology(-)
4220	394.211	8.95	0.55	0.787234	3.47	1	MRI(+)/cytology(-)<MRI(-)/cytology(-)
4719	457.175	7.99	0.55	0.787234	2.52	1	MRI(+)/cytology(-)>MRI(-)/cytology(-)
4923	482.263	8.71	0.55	0.787234	3.9	1	MRI(+)/cytology(-)<MRI(-)/cytology(-)
4962	486.111	16.01	0.55	0.787234	4.76	1	MRI(+)/cytology(-)>MRI(-)/cytology(-)
5295	526.294	13.3	0.55	0.787234	4.56	1	MRI(+)/cytology(-)<MRI(-)/cytology(-)
5307	527.301	8.76	0.55	0.787234	3.36	1	MRI(+)/cytology(-)<MRI(-)/cytology(-)
5482	562.348	8.79	0.55	0.787234	2.22	0	MRI(+)/cytology(-)<MRI(-)/cytology(-)
875	114.091	8.1	0.4	0.93617	4.55	1	MRI(+)/cytology(-)>MRI(-)/cytology(-)
1048	123.099	21.22	0.4	0.93617	4.495	1	MRI(+)/cytology(-)>MRI(-)/cytology(-)
1258	127.094	8.54	0.4	0.93617	3.245	1	MRI(+)/cytology(-)>MRI(-)/cytology(-)
1711	171.113	8.2	0.4	0.93617	3.485	1	MRI(+)/cytology(-)>MRI(-)/cytology(-)
1930	193.088	9.27	0.4	0.93617	3.74	1	MRI(+)/cytology(-)>MRI(-)/cytology(-)
2679	248.864	23.49	0.4	0.93617	5.23	1	MRI(+)/cytology(-)<MRI(-)/cytology(-)
3112	284.206	7.67	0.4	0.93617	2.75	1	MRI(+)/cytology(-)>MRI(-)/cytology(-)
3748	349.183	8.64	0.4	0.93617	4.16	1	MRI(+)/cytology(-)<MRI(-)/cytology(-)
5266	525.288	8.84	0.4	0.93617	4.51	1	MRI(+)/cytology(-)<MRI(-)/cytology(-)
5290	526.291	8.76	0.4	0.93617	3.85	1	MRI(+)/cytology(-)<MRI(-)/cytology(-)
13	55.9368	23.5	0.95	0.382979	5.28	1	MRI(+)/cytology(-)>MRI(-)/cytology(-)
67	59.0516	9.75	0.95	0.382979	4.89	1	MRI(+)/cytology(-)>MRI(-)/cytology(-)
272	79.9433	23.51	0.95	0.382979	5.01	1	MRI(+)/cytology(-)>MRI(-)/cytology(-)
2664	247.245	9.13	0.95	0.382979	4.98	1	MRI(+)/cytology(-)<MRI(-)/cytology(-)
4709	454.235	8.7	0.95	0.382979	3.205	1	MRI(+)/cytology(-)<MRI(-)/cytology(-)
4793	465.233	10.82	0.95	0.382979	2.91	1	MRI(+)/cytology(-)>MRI(-)/cytology(-)
5375	541.254	8.4	0.95	0.382979	4.37	0	MRI(+)/cytology(-)<MRI(-)/cytology(-)
5456	550.363	8.38	0.95	0.382979	4.625	0	MRI(+)/cytology(-)<MRI(-)/cytology(-)
6093	701.392	8.75	0.95	0.382979	5.19	1	MRI(+)/cytology(-)<MRI(-)/cytology(-)
6170	724.461	8.75	0.95	0.382979	4.48	1	MRI(+)/cytology(-)<MRI(-)/cytology(-)
669	102.129	14.56	0.8	0.531915	5.61	1	MRI(+)/cytology(-)<MRI(-)/cytology(-)
692	102.129	10.41	0.8	0.531915	5.23	1	MRI(+)/cytology(-)<MRI(-)/cytology(-)
922	120.969	23.48	0.8	0.531915	5.35	1	MRI(+)/cytology(-)>MRI(-)/cytology(-)
1084	124.086	15.89	0.8	0.531915	5.04	1	MRI(+)/cytology(-)>MRI(-)/cytology(-)
2614	241.006	1.35	0.8	0.531915	3.8	1	MRI(+)/cytology(-)<MRI(-)/cytology(-)
3010	277.127	9.57	0.8	0.531915	4.17	1	MRI(+)/cytology(-)<MRI(-)/cytology(-)
4267	400.252	14.43	0.8	0.531915	4.89	1	MRI(+)/cytology(-)>MRI(-)/cytology(-)
4640	438.239	8.88	0.8	0.531915	3.83	1	MRI(+)/cytology(-)<MRI(-)/cytology(-)
4666	448.273	8.61	0.8	0.531915	3.73	1	MRI(+)/cytology(-)<MRI(-)/cytology(-)
4705	454.232	8.77	0.8	0.531915	3.22	1	MRI(+)/cytology(-)<MRI(-)/cytology(-)
5224	522.338	8.75	0.8	0.531915	3.18	1	MRI(+)/cytology(-)<MRI(-)/cytology(-)
5464	552.78	22.98	0.8	0.531915	4.09	1	MRI(+)/cytology(-)<MRI(-)/cytology(-)
5572	567.364	8.82	0.8	0.531915	2.005	0	MRI(+)/cytology(-)<MRI(-)/cytology(-)
5640	580.357	9.88	0.8	0.531915	2.49	1	MRI(+)/cytology(-)<MRI(-)/cytology(-)
5955	644.727	23	0.8	0.531915	3.95	1	MRI(+)/cytology(-)<MRI(-)/cytology(-)
5961	652.409	9.99	0.8	0.531915	3.22	1	MRI(+)/cytology(-)<MRI(-)/cytology(-)
6175	724.477	8.73	0.8	0.531915	4.225	1	MRI(+)/cytology(-)<MRI(-)/cytology(-)
6519	1065.79	1.62	0.8	0.531915	4.17	1	MRI(+)/cytology(-)>MRI(-)/cytology(-)
6554	1145.79	1.65	0.8	0.531915	4.7	1	MRI(+)/cytology(-)>MRI(-)/cytology(-)
181	60.0473	17.95	0.65	0.680851	4.91	1	MRI(+)/cytology(-)>MRI(-)/cytology(-)
681	102.129	2.1	0.65	0.680851	4.54	1	MRI(+)/cytology(-)<MRI(-)/cytology(-)
818	109.944	23.42	0.65	0.680851	5.22	1	MRI(+)/cytology(-)>MRI(-)/cytology(-)
1045	123.084	20.54	0.65	0.680851	4.65	1	MRI(+)/cytology(-)>MRI(-)/cytology(-)
1052	123.099	19.08	0.65	0.680851	4.72	1	MRI(+)/cytology(-)>MRI(-)/cytology(-)
1054	123.099	19.51	0.65	0.680851	4.49	1	MRI(+)/cytology(-)>MRI(-)/cytology(-)
2040	202.217	8.9	0.65	0.680851	4.945	1	MRI(+)/cytology(-)>MRI(-)/cytology(-)
2349	226.093	8.17	0.65	0.680851	3.17	1	MRI(+)/cytology(-)<MRI(-)/cytology(-)
2403	226.952	1.63	0.65	0.680851	5.42	1	MRI(+)/cytology(-)>MRI(-)/cytology(-)
2910	262.236	9.16	0.65	0.680851	3.87	1	MRI(+)/cytology(-)<MRI(-)/cytology(-)
4037	373.26	8.64	0.65	0.680851	2.815	1	MRI(+)/cytology(-)<MRI(-)/cytology(-)
4062	378.899	1.57	0.65	0.680851	5.17	1	MRI(+)/cytology(-)<MRI(-)/cytology(-)
4133	389.12	2.12	0.65	0.680851	3.225	1	MRI(+)/cytology(-)>MRI(-)/cytology(-)
4408	417.288	8.46	0.65	0.680851	3.655	1	MRI(+)/cytology(-)<MRI(-)/cytology(-)
4534	432.28	8.49	0.65	0.680851	4.94	1	MRI(+)/cytology(-)<MRI(-)/cytology(-)
4578	435.216	8.82	0.65	0.680851	2.96	1	MRI(+)/cytology(-)<MRI(-)/cytology(-)
4931	482.267	8.62	0.65	0.680851	4.4	1	MRI(+)/cytology(-)<MRI(-)/cytology(-)
5004	496.34	13.82	0.65	0.680851	4.045	1	MRI(+)/cytology(-)<MRI(-)/cytology(-)
5080	498.902	20.69	0.65	0.680851	1.965	0	MRI(+)/cytology(-)<MRI(-)/cytology(-)
5136	505.337	9.03	0.65	0.680851	3.43	1	MRI(+)/cytology(-)<MRI(-)/cytology(-)
5472	559.133	17.3	0.65	0.680851	4.34	1	MRI(+)/cytology(-)>MRI(-)/cytology(-)
5705	592.393	8.74	0.65	0.680851	3.87	1	MRI(+)/cytology(-)<MRI(-)/cytology(-)
5748	608.384	9.14	0.65	0.680851	3.89	1	MRI(+)/cytology(-)<MRI(-)/cytology(-)
5797	614.338	9.27	0.65	0.680851	2.95	1	MRI(+)/cytology(-)<MRI(-)/cytology(-)
5846	629.313	8.65	0.65	0.680851	4.69	1	MRI(+)/cytology(-)<MRI(-)/cytology(-)
5929	636.418	8.67	0.65	0.680851	3.595	1	MRI(+)/cytology(-)<MRI(-)/cytology(-)
6485	1008.81	1.64	0.65	0.680851	5.49	1	MRI(+)/cytology(-)>MRI(-)/cytology(-)
6523	1076.8	1.63	0.65	0.680851	5.425	1	MRI(+)/cytology(-)>MRI(-)/cytology(-)
6540	1111.28	1.6	0.65	0.680851	4.96	1	MRI(+)/cytology(-)>MRI(-)/cytology(-)
64	59.0515	8.49	0.5	0.829787	4.675	1	MRI(+)/cytology(-)>MRI(-)/cytology(-)
269	76.4879	23.4	0.5	0.829787	4.9	1	MRI(+)/cytology(-)>MRI(-)/cytology(-)
800	106.078	19.85	0.5	0.829787	5.035	1	MRI(+)/cytology(-)>MRI(-)/cytology(-)
1017	123.079	16.38	0.5	0.829787	4.39	1	MRI(+)/cytology(-)>MRI(-)/cytology(-)
1050	123.099	22.68	0.5	0.829787	4.56	1	MRI(+)/cytology(-)>MRI(-)/cytology(-)
1058	123.099	20.17	0.5	0.829787	4.62	1	MRI(+)/cytology(-)>MRI(-)/cytology(-)
1255	127.094	7.89	0.5	0.829787	3.26	1	MRI(+)/cytology(-)>MRI(-)/cytology(-)
1649	166.087	7.37	0.5	0.829787	3.14	1	MRI(+)/cytology(-)>MRI(-)/cytology(-)
2303	219.083	1.67	0.5	0.829787	5.06	1	MRI(+)/cytology(-)>MRI(-)/cytology(-)
2437	229.142	9.86	0.5	0.829787	3.69	1	MRI(+)/cytology(-)<MRI(-)/cytology(-)
2926	266.174	10.68	0.5	0.829787	4.385	1	MRI(+)/cytology(-)<MRI(-)/cytology(-)
3094	284.058	9.59	0.5	0.829787	2.97	1	MRI(+)/cytology(-)<MRI(-)/cytology(-)
3707	347.17	8.4	0.5	0.829787	3.35	1	MRI(+)/cytology(-)<MRI(-)/cytology(-)
4024	372.259	8.37	0.5	0.829787	4.09	1	MRI(+)/cytology(-)<MRI(-)/cytology(-)
4036	373.26	8.79	0.5	0.829787	2.775	1	MRI(+)/cytology(-)<MRI(-)/cytology(-)
4644	438.24	8.76	0.5	0.829787	3.76	1	MRI(+)/cytology(-)<MRI(-)/cytology(-)
4655	439.243	8.55	0.5	0.829787	3.43	1	MRI(+)/cytology(-)<MRI(-)/cytology(-)
4773	461.319	8.49	0.5	0.829787	3.765	1	MRI(+)/cytology(-)<MRI(-)/cytology(-)
4878	481.132	8.21	0.5	0.829787	2.61	1	MRI(+)/cytology(-)>MRI(-)/cytology(-)
4913	481.264	8.71	0.5	0.829787	4.7	1	MRI(+)/cytology(-)<MRI(-)/cytology(-)
4938	483.265	8.69	0.5	0.829787	3.415	1	MRI(+)/cytology(-)<MRI(-)/cytology(-)
4970	491.383	13.8	0.5	0.829787	3.31	1	MRI(+)/cytology(-)<MRI(-)/cytology(-)
4979	492.3	8.62	0.5	0.829787	3.53	1	MRI(+)/cytology(-)<MRI(-)/cytology(-)
5633	580.35	8.77	0.5	0.829787	2.74	1	MRI(+)/cytology(-)<MRI(-)/cytology(-)
5689	591.36	8.67	0.5	0.829787	3.855	1	MRI(+)/cytology(-)<MRI(-)/cytology(-)
5697	592.387	8.69	0.5	0.829787	4.15	1	MRI(+)/cytology(-)<MRI(-)/cytology(-)
1245	126.091	8.05	0.35	0.978723	3.56	1	MRI(+)/cytology(-)>MRI(-)/cytology(-)
2734	255.067	8.07	0.35	0.978723	2.85	1	MRI(+)/cytology(-)>MRI(-)/cytology(-)
4432	425.166	7.89	0.35	0.978723	3.1	1	MRI(+)/cytology(-)>MRI(-)/cytology(-)
4832	476.837	22.98	0.35	0.978723	4.615	1	MRI(+)/cytology(-)<MRI(-)/cytology(-)
5729	595.815	8.17	0.35	0.978723	4.28	1	MRI(+)/cytology(-)>MRI(-)/cytology(-)
5	53.0061	1.81	0.9	0.425532	4.6	1	MRI(+)/cytology(-)>MRI(-)/cytology(-)
338	82.0542	22.6	0.9	0.425532	2.83	1	MRI(+)/cytology(-)>MRI(-)/cytology(-)
359	84.9599	23.83	0.9	0.425532	4.89	1	MRI(+)/cytology(-)>MRI(-)/cytology(-)
366	85.0281	2.08	0.9	0.425532	4.49	1	MRI(+)/cytology(-)>MRI(-)/cytology(-)
1236	125.987	23	0.9	0.425532	5.57	1	MRI(+)/cytology(-)>MRI(-)/cytology(-)
1460	144.173	8.32	0.9	0.425532	2.92	1	MRI(+)/cytology(-)<MRI(-)/cytology(-)
2193	217.104	8.77	0.9	0.425532	4.48	1	MRI(+)/cytology(-)>MRI(-)/cytology(-)
2659	247.167	22.78	0.9	0.425532	4.51	1	MRI(+)/cytology(-)<MRI(-)/cytology(-)
3116	284.208	8.03	0.9	0.425532	5.085	1	MRI(+)/cytology(-)<MRI(-)/cytology(-)
3799	351.193	8.06	0.9	0.425532	4.635	1	MRI(+)/cytology(-)<MRI(-)/cytology(-)
3966	367.151	7.65	0.9	0.425532	3.815	1	MRI(+)/cytology(-)<MRI(-)/cytology(-)
4068	382.143	8.06	0.9	0.425532	2.915	1	MRI(+)/cytology(-)<MRI(-)/cytology(-)
4323	410.208	8.04	0.9	0.425532	4.77	1	MRI(+)/cytology(-)<MRI(-)/cytology(-)
4579	435.216	8.69	0.9	0.425532	3.565	1	MRI(+)/cytology(-)<MRI(-)/cytology(-)
5010	497.231	8.63	0.9	0.425532	3.02	1	MRI(+)/cytology(-)<MRI(-)/cytology(-)
5014	497.251	8.69	0.9	0.425532	4.015	1	MRI(+)/cytology(-)<MRI(-)/cytology(-)
5032	498.256	8.66	0.9	0.425532	3.295	1	MRI(+)/cytology(-)<MRI(-)/cytology(-)
5126	504.336	8.26	0.9	0.425532	6.12	1	MRI(+)/cytology(-)<MRI(-)/cytology(-)
5378	541.268	8.72	0.9	0.425532	3.2	1	MRI(+)/cytology(-)<MRI(-)/cytology(-)
5461	550.368	8.41	0.9	0.425532	4.625	1	MRI(+)/cytology(-)<MRI(-)/cytology(-)
5607	570.32	9.4	0.9	0.425532	3.655	1	MRI(+)/cytology(-)<MRI(-)/cytology(-)
5740	604.792	22.98	0.9	0.425532	5.38	1	MRI(+)/cytology(-)<MRI(-)/cytology(-)
5763	609.39	8.78	0.9	0.425532	3.465	1	MRI(+)/cytology(-)<MRI(-)/cytology(-)
5776	610.39	8.5	0.9	0.425532	4.885	0	MRI(+)/cytology(-)<MRI(-)/cytology(-)
5789	613.342	8.88	0.9	0.425532	4.275	0	MRI(+)/cytology(-)<MRI(-)/cytology(-)
5799	614.34	8.86	0.9	0.425532	3.64	1	MRI(+)/cytology(-)<MRI(-)/cytology(-)
5923	636.41	9.28	0.9	0.425532	2.89	1	MRI(+)/cytology(-)<MRI(-)/cytology(-)
5976	653.413	8.56	0.9	0.425532	5.19	1	MRI(+)/cytology(-)<MRI(-)/cytology(-)
205	68.9949	24.29	0.75	0.574468	4.75	1	MRI(+)/cytology(-)>MRI(-)/cytology(-)
810	107.086	0.1	0.75	0.574468	5.19	1	MRI(+)/cytology(-)>MRI(-)/cytology(-)
841	110.072	19.57	0.75	0.574468	3.79	1	MRI(+)/cytology(-)>MRI(-)/cytology(-)
993	122.097	19.94	0.75	0.574468	4.59	1	MRI(+)/cytology(-)<MRI(-)/cytology(-)
1032	123.08	16.88	0.75	0.574468	5.05	1	MRI(+)/cytology(-)>MRI(-)/cytology(-)
1109	124.087	8	0.75	0.574468	3.81	1	MRI(+)/cytology(-)>MRI(-)/cytology(-)
1251	127.024	1.33	0.75	0.574468	5.175	1	MRI(+)/cytology(-)<MRI(-)/cytology(-)
1349	136.112	19.29	0.75	0.574468	4.06	1	MRI(+)/cytology(-)<MRI(-)/cytology(-)
1439	141.957	0.08	0.75	0.574468	4.55	1	MRI(+)/cytology(-)>MRI(-)/cytology(-)
1453	143.959	23.03	0.75	0.574468	5.57	1	MRI(+)/cytology(-)>MRI(-)/cytology(-)
1996	198.073	8.47	0.75	0.574468	2.52	0	MRI(+)/cytology(-)>MRI(-)/cytology(-)
2058	205.067	2.09	0.75	0.574468	5.2	1	MRI(+)/cytology(-)>MRI(-)/cytology(-)
2110	214.252	19.82	0.75	0.574468	3.38	1	MRI(+)/cytology(-)<MRI(-)/cytology(-)
2344	224.861	23.02	0.75	0.574468	4.86	1	MRI(+)/cytology(-)<MRI(-)/cytology(-)
2640	246.243	9.13	0.75	0.574468	5.635	1	MRI(+)/cytology(-)<MRI(-)/cytology(-)
3006	277.125	7.75	0.75	0.574468	3.35	1	MRI(+)/cytology(-)>MRI(-)/cytology(-)
3042	281.247	13.36	0.75	0.574468	4.84	1	MRI(+)/cytology(-)>MRI(-)/cytology(-)
3500	325.236	13.93	0.75	0.574468	4.51	1	MRI(+)/cytology(-)<MRI(-)/cytology(-)
3543	328.233	8.13	0.75	0.574468	5.005	1	MRI(+)/cytology(-)<MRI(-)/cytology(-)
3862	360.224	9.7	0.75	0.574468	3.395	1	MRI(+)/cytology(-)<MRI(-)/cytology(-)
4365	415.252	8.88	0.75	0.574468	4.29	1	MRI(+)/cytology(-)<MRI(-)/cytology(-)
4436	425.215	15.53	0.75	0.574468	5.15	1	MRI(+)/cytology(-)<MRI(-)/cytology(-)
4958	485.113	16.06	0.75	0.574468	5.07	1	MRI(+)/cytology(-)>MRI(-)/cytology(-)
5118	504.308	9.36	0.75	0.574468	4.07	1	MRI(+)/cytology(-)<MRI(-)/cytology(-)
5523	566.886	21.92	0.75	0.574468	2.12	1	MRI(+)/cytology(-)<MRI(-)/cytology(-)
5582	569.31	8.8	0.75	0.574468	4.43	1	MRI(+)/cytology(-)<MRI(-)/cytology(-)
5670	586.303	8.96	0.75	0.574468	2.35	0	MRI(+)/cytology(-)<MRI(-)/cytology(-)
5722	594.394	8.83	0.75	0.574468	2.02	0	MRI(+)/cytology(-)<MRI(-)/cytology(-)
6277	804.843	1.71	0.75	0.574468	5.61	1	MRI(+)/cytology(-)>MRI(-)/cytology(-)
6327	853.722	19.46	0.75	0.574468	3.66	1	MRI(+)/cytology(-)>MRI(-)/cytology(-)
6371	854.728	19.89	0.75	0.574468	3.46	1	MRI(+)/cytology(-)>MRI(-)/cytology(-)
6454	952.155	1.64	0.75	0.574468	4.86	1	MRI(+)/cytology(-)>MRI(-)/cytology(-)
6548	1144.78	1.71	0.75	0.574468	5.36	1	MRI(+)/cytology(-)>MRI(-)/cytology(-)
8	54.5006	23.06	0.6	0.723404	4.255	1	MRI(+)/cytology(-)>MRI(-)/cytology(-)
781	105.034	8.18	0.6	0.723404	3.05	1	MRI(+)/cytology(-)>MRI(-)/cytology(-)
928	121.084	7.37	0.6	0.723404	3.58	1	MRI(+)/cytology(-)>MRI(-)/cytology(-)
1724	173.011	22.99	0.6	0.723404	4.405	1	MRI(+)/cytology(-)<MRI(-)/cytology(-)
1811	176.078	7.99	0.6	0.723404	2.715	1	MRI(+)/cytology(-)>MRI(-)/cytology(-)
2008	200.045	2.08	0.6	0.723404	5.09	1	MRI(+)/cytology(-)>MRI(-)/cytology(-)
2012	200.236	10.01	0.6	0.723404	4.67	0	MRI(+)/cytology(-)>MRI(-)/cytology(-)
3124	285.011	9.68	0.6	0.723404	2.655	1	MRI(+)/cytology(-)<MRI(-)/cytology(-)
3143	289.1	8.81	0.6	0.723404	2.73	1	MRI(+)/cytology(-)>MRI(-)/cytology(-)
3524	328.203	8.56	0.6	0.723404	3.42	1	MRI(+)/cytology(-)<MRI(-)/cytology(-)
4233	394.873	1.57	0.6	0.723404	3.67	1	MRI(+)/cytology(-)<MRI(-)/cytology(-)
4778	462.316	8.76	0.6	0.723404	2.4	0	MRI(+)/cytology(-)<MRI(-)/cytology(-)
4845	477.381	12.58	0.6	0.723404	3.615	1	MRI(+)/cytology(-)<MRI(-)/cytology(-)
5122	504.334	9.16	0.6	0.723404	4.02	1	MRI(+)/cytology(-)<MRI(-)/cytology(-)
5150	506.343	8.63	0.6	0.723404	2.92	0	MRI(+)/cytology(-)<MRI(-)/cytology(-)
5279	525.29	8.98	0.6	0.723404	4.21	1	MRI(+)/cytology(-)<MRI(-)/cytology(-)
5392	542.28	8.63	0.6	0.723404	2.81	1	MRI(+)/cytology(-)<MRI(-)/cytology(-)
5534	566.887	20.16	0.6	0.723404	2.445	0	MRI(+)/cytology(-)>MRI(-)/cytology(-)
5728	595.809	8.35	0.6	0.723404	3.04	0	MRI(+)/cytology(-)<MRI(-)/cytology(-)
5732	601.265	8.5	0.6	0.723404	3.065	1	MRI(+)/cytology(-)<MRI(-)/cytology(-)
5744	607.25	19.4	0.6	0.723404	2.445	0	MRI(+)/cytology(-)>MRI(-)/cytology(-)
6386	872.83	1.65	0.6	0.723404	5.57	1	MRI(+)/cytology(-)>MRI(-)/cytology(-)
506	97.9695	23.43	0.45	0.87234	5.6	1	MRI(+)/cytology(-)>MRI(-)/cytology(-)
724	102.129	22.36	0.45	0.87234	4.78	1	MRI(+)/cytology(-)<MRI(-)/cytology(-)
739	102.129	22.56	0.45	0.87234	5.15	1	MRI(+)/cytology(-)<MRI(-)/cytology(-)
853	110.974	3.86	0.45	0.87234	5.015	1	MRI(+)/cytology(-)>MRI(-)/cytology(-)
1287	130.958	23.49	0.45	0.87234	5.16	1	MRI(+)/cytology(-)>MRI(-)/cytology(-)
1815	178.122	22.78	0.45	0.87234	4.11	1	MRI(+)/cytology(-)<MRI(-)/cytology(-)
3393	307.176	8.59	0.45	0.87234	3.66	1	MRI(+)/cytology(-)<MRI(-)/cytology(-)
3503	326.783	23.47	0.45	0.87234	4.57	1	MRI(+)/cytology(-)<MRI(-)/cytology(-)
3554	329.192	8.82	0.45	0.87234	3.52	1	MRI(+)/cytology(-)<MRI(-)/cytology(-)
4033	372.792	23.05	0.45	0.87234	4.18	1	MRI(+)/cytology(-)<MRI(-)/cytology(-)
4080	384.114	7.95	0.45	0.87234	2.575	1	MRI(+)/cytology(-)>MRI(-)/cytology(-)
4108	387.105	2.15	0.45	0.87234	4.47	1	MRI(+)/cytology(-)>MRI(-)/cytology(-)
4539	432.281	8.32	0.45	0.87234	5.19	1	MRI(+)/cytology(-)<MRI(-)/cytology(-)
5379	541.272	8.95	0.45	0.87234	3.28	1	MRI(+)/cytology(-)<MRI(-)/cytology(-)
5669	586.287	8.67	0.45	0.87234	1.81	0	MRI(+)/cytology(-)<MRI(-)/cytology(-)
5671	586.303	8.64	0.45	0.87234	2.665	0	MRI(+)/cytology(-)<MRI(-)/cytology(-)
215	68.9951	23.97	1	0.319149	4.69	1	MRI(+)/cytology(-)>MRI(-)/cytology(-)
387	85.0407	19.2	1	0.319149	3.14	1	MRI(+)/cytology(-)>MRI(-)/cytology(-)
481	91.0551	16.63	1	0.319149	3.735	1	MRI(+)/cytology(-)>MRI(-)/cytology(-)
695	102.129	21.87	1	0.319149	5.82	1	MRI(+)/cytology(-)<MRI(-)/cytology(-)
3912	362.928	20.93	1	0.319149	1.51	1	MRI(+)/cytology(-)>MRI(-)/cytology(-)
3974	371.1	17.29	1	0.319149	4.44	1	MRI(+)/cytology(-)>MRI(-)/cytology(-)
589	102.127	25.23	0.85	0.468085	4.92	1	MRI(+)/cytology(-)<MRI(-)/cytology(-)
636	102.128	21.39	0.85	0.468085	5.07	1	MRI(+)/cytology(-)<MRI(-)/cytology(-)
719	102.129	13.48	0.85	0.468085	5.645	1	MRI(+)/cytology(-)<MRI(-)/cytology(-)
723	102.129	2.25	0.85	0.468085	4.975	1	MRI(+)/cytology(-)<MRI(-)/cytology(-)
736	102.129	23.83	0.85	0.468085	5.12	1	MRI(+)/cytology(-)<MRI(-)/cytology(-)
1072	123.1	19.74	0.85	0.468085	4.64	1	MRI(+)/cytology(-)>MRI(-)/cytology(-)
1730	173.077	7.4	0.85	0.468085	4.22	1	MRI(+)/cytology(-)>MRI(-)/cytology(-)
2168	217.104	8.59	0.85	0.468085	4.41	1	MRI(+)/cytology(-)>MRI(-)/cytology(-)
2284	218.21	8.68	0.85	0.468085	3.605	1	MRI(+)/cytology(-)<MRI(-)/cytology(-)
2599	240.149	8.03	0.85	0.468085	3.15	1	MRI(+)/cytology(-)<MRI(-)/cytology(-)
2918	264.032	9.66	0.85	0.468085	2.5	1	MRI(+)/cytology(-)<MRI(-)/cytology(-)
3258	302.307	10.87	0.85	0.468085	4.08	1	MRI(+)/cytology(-)<MRI(-)/cytology(-)
3335	305.158	8	0.85	0.468085	5.345	1	MRI(+)/cytology(-)<MRI(-)/cytology(-)
3844	358.368	11.64	0.85	0.468085	5.05	1	MRI(+)/cytology(-)<MRI(-)/cytology(-)
3947	365.178	8.69	0.85	0.468085	3.96	1	MRI(+)/cytology(-)<MRI(-)/cytology(-)
4016	372.251	8.21	0.85	0.468085	4.49	1	MRI(+)/cytology(-)<MRI(-)/cytology(-)
4327	411.091	14.7	0.85	0.468085	4.89	1	MRI(+)/cytology(-)>MRI(-)/cytology(-)
4387	416.284	8.26	0.85	0.468085	5.3	1	MRI(+)/cytology(-)<MRI(-)/cytology(-)
4573	434.286	9.29	0.85	0.468085	3.02	1	MRI(+)/cytology(-)<MRI(-)/cytology(-)
4641	438.239	8.66	0.85	0.468085	3.96	1	MRI(+)/cytology(-)<MRI(-)/cytology(-)
4685	449.281	8.2	0.85	0.468085	4.48	1	MRI(+)/cytology(-)<MRI(-)/cytology(-)
4921	482.262	8.82	0.85	0.468085	4	1	MRI(+)/cytology(-)<MRI(-)/cytology(-)
5206	521.334	8.66	0.85	0.468085	4.32	1	MRI(+)/cytology(-)<MRI(-)/cytology(-)
5208	521.335	9.91	0.85	0.468085	3.85	1	MRI(+)/cytology(-)<MRI(-)/cytology(-)
5209	521.335	9.36	0.85	0.468085	3.85	1	MRI(+)/cytology(-)<MRI(-)/cytology(-)
5383	541.278	8.88	0.85	0.468085	3.675	1	MRI(+)/cytology(-)<MRI(-)/cytology(-)
5387	541.28	8.69	0.85	0.468085	3.675	1	MRI(+)/cytology(-)<MRI(-)/cytology(-)
5400	542.823	22.96	0.85	0.468085	4.3	1	MRI(+)/cytology(-)<MRI(-)/cytology(-)
5720	594.392	8.58	0.85	0.468085	4.43	1	MRI(+)/cytology(-)<MRI(-)/cytology(-)
5752	608.386	8.73	0.85	0.468085	6.09	1	MRI(+)/cytology(-)<MRI(-)/cytology(-)
5765	609.39	8.5	0.85	0.468085	5.62	1	MRI(+)/cytology(-)<MRI(-)/cytology(-)
5811	615.339	9.43	0.85	0.468085	2.13	0	MRI(+)/cytology(-)<MRI(-)/cytology(-)
5841	626.755	22.94	0.85	0.468085	4.275	1	MRI(+)/cytology(-)<MRI(-)/cytology(-)
5916	635.385	8.87	0.85	0.468085	3.015	1	MRI(+)/cytology(-)<MRI(-)/cytology(-)
6005	658.366	8.66	0.85	0.468085	5.17	1	MRI(+)/cytology(-)<MRI(-)/cytology(-)
676	102.129	16.27	0.7	0.617021	5.54	1	MRI(+)/cytology(-)<MRI(-)/cytology(-)
712	102.129	21.61	0.7	0.617021	5.635	1	MRI(+)/cytology(-)<MRI(-)/cytology(-)
730	102.129	24.09	0.7	0.617021	4.85	1	MRI(+)/cytology(-)<MRI(-)/cytology(-)
901	118.942	23.51	0.7	0.617021	5.01	1	MRI(+)/cytology(-)>MRI(-)/cytology(-)
1157	124.087	21.17	0.7	0.617021	4.8	1	MRI(+)/cytology(-)<MRI(-)/cytology(-)
1371	136.113	20.64	0.7	0.617021	3.82	1	MRI(+)/cytology(-)<MRI(-)/cytology(-)
1555	158.963	19.87	0.7	0.617021	3.225	1	MRI(+)/cytology(-)<MRI(-)/cytology(-)
1788	174.185	8.57	0.7	0.617021	2.8	1	MRI(+)/cytology(-)<MRI(-)/cytology(-)
2099	213.145	11.16	0.7	0.617021	4.73	1	MRI(+)/cytology(-)>MRI(-)/cytology(-)
2114	214.252	10.5	0.7	0.617021	4.04	1	MRI(+)/cytology(-)<MRI(-)/cytology(-)
3117	284.208	8.96	0.7	0.617021	3.49	1	MRI(+)/cytology(-)<MRI(-)/cytology(-)
3248	301.141	15	0.7	0.617021	4.935	1	MRI(+)/cytology(-)<MRI(-)/cytology(-)
4056	376.82	23.46	0.7	0.617021	5.58	1	MRI(+)/cytology(-)<MRI(-)/cytology(-)
4215	394.126	8.02	0.7	0.617021	2.13	0	MRI(+)/cytology(-)>MRI(-)/cytology(-)
4358	415.143	7.89	0.7	0.617021	2.04	1	MRI(+)/cytology(-)>MRI(-)/cytology(-)
4772	461.316	8.57	0.7	0.617021	3.48	1	MRI(+)/cytology(-)<MRI(-)/cytology(-)
4929	482.266	9.04	0.7	0.617021	3.85	1	MRI(+)/cytology(-)<MRI(-)/cytology(-)
5972	653.41	8.86	0.7	0.617021	2.84	1	MRI(+)/cytology(-)<MRI(-)/cytology(-)
6443	941.318	1.66	0.7	0.617021	5.09	1	MRI(+)/cytology(-)>MRI(-)/cytology(-)
14	55.9587	22.92	0.55	0.765957	4.24	1	MRI(+)/cytology(-)>MRI(-)/cytology(-)
244	72.0826	2.31	0.55	0.765957	4.44	1	MRI(+)/cytology(-)>MRI(-)/cytology(-)
788	106.077	20.73	0.55	0.765957	5.15	1	MRI(+)/cytology(-)>MRI(-)/cytology(-)
923	121.082	7.87	0.55	0.765957	4.37	1	MRI(+)/cytology(-)>MRI(-)/cytology(-)
1277	130.158	8.44	0.55	0.765957	3.1	1	MRI(+)/cytology(-)<MRI(-)/cytology(-)
1851	185.116	10.12	0.55	0.765957	3.93	1	MRI(+)/cytology(-)>MRI(-)/cytology(-)
1934	193.094	8.42	0.55	0.765957	3.585	1	MRI(+)/cytology(-)>MRI(-)/cytology(-)
2161	217.103	23.07	0.55	0.765957	4.45	1	MRI(+)/cytology(-)<MRI(-)/cytology(-)
2392	226.952	20.04	0.55	0.765957	3.89	1	MRI(+)/cytology(-)>MRI(-)/cytology(-)
2470	230.891	23.38	0.55	0.765957	5.91	1	MRI(+)/cytology(-)<MRI(-)/cytology(-)
3510	327.199	8.15	0.55	0.765957	4.615	1	MRI(+)/cytology(-)<MRI(-)/cytology(-)
3539	328.233	8.73	0.55	0.765957	3.585	1	MRI(+)/cytology(-)<MRI(-)/cytology(-)
3653	340.211	8.71	0.55	0.765957	3.655	1	MRI(+)/cytology(-)<MRI(-)/cytology(-)
3702	347.168	8.2	0.55	0.765957	3.505	1	MRI(+)/cytology(-)<MRI(-)/cytology(-)
4094	384.122	2.09	0.55	0.765957	4.87	1	MRI(+)/cytology(-)>MRI(-)/cytology(-)
4121	388.254	8.48	0.55	0.765957	4.115	1	MRI(+)/cytology(-)<MRI(-)/cytology(-)
4240	395.217	8.51	0.55	0.765957	3.495	1	MRI(+)/cytology(-)<MRI(-)/cytology(-)
4371	416.058	2.14	0.55	0.765957	4.325	1	MRI(+)/cytology(-)>MRI(-)/cytology(-)
4389	416.285	8.39	0.55	0.765957	4.855	1	MRI(+)/cytology(-)<MRI(-)/cytology(-)
4712	455.037	11.85	0.55	0.765957	2.645	1	MRI(+)/cytology(-)>MRI(-)/cytology(-)
4782	462.864	1.57	0.55	0.765957	3.95	1	MRI(+)/cytology(-)<MRI(-)/cytology(-)
4895	481.261	8.69	0.55	0.765957	4.665	1	MRI(+)/cytology(-)<MRI(-)/cytology(-)
4985	492.305	8.55	0.55	0.765957	4.55	1	MRI(+)/cytology(-)<MRI(-)/cytology(-)
5019	497.255	9.81	0.55	0.765957	3.64	1	MRI(+)/cytology(-)<MRI(-)/cytology(-)
5128	504.338	8.4	0.55	0.765957	5.07	1	MRI(+)/cytology(-)<MRI(-)/cytology(-)
5132	504.339	8.42	0.55	0.765957	4.92	1	MRI(+)/cytology(-)<MRI(-)/cytology(-)
5313	528.294	8.63	0.55	0.765957	2.655	0	MRI(+)/cytology(-)<MRI(-)/cytology(-)
5361	536.332	8.42	0.55	0.765957	4.3	1	MRI(+)/cytology(-)<MRI(-)/cytology(-)
5384	541.278	8.59	0.55	0.765957	4.305	1	MRI(+)/cytology(-)<MRI(-)/cytology(-)
5419	547.333	8.69	0.55	0.765957	4.455	1	MRI(+)/cytology(-)<MRI(-)/cytology(-)
5422	547.334	8.68	0.55	0.765957	4.52	1	MRI(+)/cytology(-)<MRI(-)/cytology(-)
5486	564.356	8.68	0.55	0.765957	5.77	1	MRI(+)/cytology(-)<MRI(-)/cytology(-)
5503	565.365	8.58	0.55	0.765957	4.46	1	MRI(+)/cytology(-)<MRI(-)/cytology(-)
5520	566.885	19.47	0.55	0.765957	2.555	0	MRI(+)/cytology(-)>MRI(-)/cytology(-)
5619	571.323	8.6	0.55	0.765957	3.22	1	MRI(+)/cytology(-)<MRI(-)/cytology(-)
5675	586.313	8.49	0.55	0.765957	3.2	1	MRI(+)/cytology(-)<MRI(-)/cytology(-)
5727	594.775	23	0.55	0.765957	3.92	1	MRI(+)/cytology(-)<MRI(-)/cytology(-)
5806	614.345	9.96	0.55	0.765957	2.74	1	MRI(+)/cytology(-)<MRI(-)/cytology(-)
5835	624.381	8.66	0.55	0.765957	3.14	1	MRI(+)/cytology(-)<MRI(-)/cytology(-)
6034	679.405	8.79	0.55	0.765957	3.15	1	MRI(+)/cytology(-)<MRI(-)/cytology(-)
6128	702.862	20.16	0.55	0.765957	2.175	0	MRI(+)/cytology(-)>MRI(-)/cytology(-)
6429	923.775	18.85	0.55	0.765957	3.92	0	MRI(+)/cytology(-)>MRI(-)/cytology(-)
249	72.9385	23.44	0.4	0.914894	6.03	1	MRI(+)/cytology(-)>MRI(-)/cytology(-)
1919	192.137	8.25	0.4	0.914894	2.925	1	MRI(+)/cytology(-)<MRI(-)/cytology(-)
1935	193.095	8.4	0.4	0.914894	3.845	1	MRI(+)/cytology(-)>MRI(-)/cytology(-)
4065	380.817	23.04	0.4	0.914894	4.37	1	MRI(+)/cytology(-)<MRI(-)/cytology(-)
4717	456.18	7.99	0.4	0.914894	2.85	1	MRI(+)/cytology(-)>MRI(-)/cytology(-)
5312	528.293	8.78	0.4	0.914894	1.89	0	MRI(+)/cytology(-)<MRI(-)/cytology(-)
5691	591.365	9.06	0.4	0.914894	3.21	0	MRI(+)/cytology(-)<MRI(-)/cytology(-)
6559	1153.28	18.85	0.4	0.914894	3.495	1	MRI(+)/cytology(-)>MRI(-)/cytology(-)
262	73.946	23.47	0.95	0.361702	5.19	1	MRI(+)/cytology(-)>MRI(-)/cytology(-)
726	102.129	20.74	0.95	0.361702	5.61	1	MRI(+)/cytology(-)<MRI(-)/cytology(-)
913	120.08	8.02	0.95	0.361702	3.01	1	MRI(+)/cytology(-)>MRI(-)/cytology(-)
2713	253.097	10.67	0.95	0.361702	3.82	1	MRI(+)/cytology(-)<MRI(-)/cytology(-)
3193	295.227	11.31	0.95	0.361702	5.04	1	MRI(+)/cytology(-)<MRI(-)/cytology(-)
3426	315.158	8.53	0.95	0.361702	4.23	1	MRI(+)/cytology(-)<MRI(-)/cytology(-)
3649	340.207	9.02	0.95	0.361702	3.17	1	MRI(+)/cytology(-)<MRI(-)/cytology(-)
4110	387.18	11.96	0.95	0.361702	3.685	1	MRI(+)/cytology(-)>MRI(-)/cytology(-)
4146	389.26	8.17	0.95	0.361702	5.195	1	MRI(+)/cytology(-)<MRI(-)/cytology(-)
4419	419.081	2.12	0.95	0.361702	3.12	1	MRI(+)/cytology(-)>MRI(-)/cytology(-)
4472	430.912	22.68	0.95	0.361702	5.02	1	MRI(+)/cytology(-)<MRI(-)/cytology(-)
4552	433.282	8.37	0.95	0.361702	5.69	1	MRI(+)/cytology(-)<MRI(-)/cytology(-)
4703	454.23	8.34	0.95	0.361702	4.81	1	MRI(+)/cytology(-)<MRI(-)/cytology(-)
4991	493.298	8.64	0.95	0.361702	3.675	1	MRI(+)/cytology(-)<MRI(-)/cytology(-)
5176	518.322	8.32	0.95	0.361702	4.04	1	MRI(+)/cytology(-)<MRI(-)/cytology(-)
5219	522.334	8.84	0.95	0.361702	3.175	1	MRI(+)/cytology(-)<MRI(-)/cytology(-)
5227	522.339	9.08	0.95	0.361702	3.015	1	MRI(+)/cytology(-)<MRI(-)/cytology(-)
5542	566.887	22.69	0.95	0.361702	4.8	1	MRI(+)/cytology(-)<MRI(-)/cytology(-)
6037	679.411	8.61	0.95	0.361702	4.535	1	MRI(+)/cytology(-)<MRI(-)/cytology(-)
6571	1185.27	7.97	0.95	0.361702	0.345	0	MRI(+)/cytology(-)>MRI(-)/cytology(-)
222	68.9962	24.14	0.8	0.510638	4.685	1	MRI(+)/cytology(-)>MRI(-)/cytology(-)
865	113.053	2.36	0.8	0.510638	3.49	1	MRI(+)/cytology(-)>MRI(-)/cytology(-)
1187	124.087	17.14	0.8	0.510638	5.3	1	MRI(+)/cytology(-)>MRI(-)/cytology(-)
1603	161.096	12.14	0.8	0.510638	4.56	1	MRI(+)/cytology(-)<MRI(-)/cytology(-)
2425	228.195	11.89	0.8	0.510638	3.83	1	MRI(+)/cytology(-)<MRI(-)/cytology(-)
3806	351.199	8.55	0.8	0.510638	4.49	1	MRI(+)/cytology(-)<MRI(-)/cytology(-)
4743	460.309	9.11	0.8	0.510638	4.16	1	MRI(+)/cytology(-)<MRI(-)/cytology(-)
4790	464.813	22.98	0.8	0.510638	4.6	1	MRI(+)/cytology(-)<MRI(-)/cytology(-)
5031	498.256	8.62	0.8	0.510638	3.4	1	MRI(+)/cytology(-)<MRI(-)/cytology(-)
5588	569.313	9.4	0.8	0.510638	4.32	1	MRI(+)/cytology(-)<MRI(-)/cytology(-)
5646	581.353	8.38	0.8	0.510638	4.205	0	MRI(+)/cytology(-)<MRI(-)/cytology(-)
6391	873.332	1.62	0.8	0.510638	5.07	1	MRI(+)/cytology(-)>MRI(-)/cytology(-)
6486	1009.31	1.66	0.8	0.510638	5.01	1	MRI(+)/cytology(-)>MRI(-)/cytology(-)
6547	1144.78	1.67	0.8	0.510638	5.3	1	MRI(+)/cytology(-)>MRI(-)/cytology(-)
187	61.0308	2.24	0.65	0.659574	4.84	1	MRI(+)/cytology(-)>MRI(-)/cytology(-)
602	102.128	23.79	0.65	0.659574	5.145	1	MRI(+)/cytology(-)<MRI(-)/cytology(-)
917	120.081	7.38	0.65	0.659574	3.28	1	MRI(+)/cytology(-)>MRI(-)/cytology(-)
956	122.096	18.56	0.65	0.659574	4.57	1	MRI(+)/cytology(-)<MRI(-)/cytology(-)
978	122.097	19.16	0.65	0.659574	4.54	1	MRI(+)/cytology(-)<MRI(-)/cytology(-)
1047	123.098	22.41	0.65	0.659574	4.55	1	MRI(+)/cytology(-)>MRI(-)/cytology(-)
1253	127.093	8.56	0.65	0.659574	3.21	1	MRI(+)/cytology(-)>MRI(-)/cytology(-)
1423	138.978	23.06	0.65	0.659574	4.49	1	MRI(+)/cytology(-)>MRI(-)/cytology(-)
1543	158.154	12.18	0.65	0.659574	4.26	1	MRI(+)/cytology(-)<MRI(-)/cytology(-)
1613	163.132	9.6	0.65	0.659574	3.765	1	MRI(+)/cytology(-)>MRI(-)/cytology(-)
1716	172.097	8.62	0.65	0.659574	3.04	1	MRI(+)/cytology(-)>MRI(-)/cytology(-)
1838	182.963	22.93	0.65	0.659574	4.665	1	MRI(+)/cytology(-)<MRI(-)/cytology(-)
1998	198.074	8.02	0.65	0.659574	2.64	1	MRI(+)/cytology(-)<MRI(-)/cytology(-)
2042	202.874	23.56	0.65	0.659574	5.35	1	MRI(+)/cytology(-)<MRI(-)/cytology(-)
2307	219.212	8.9	0.65	0.659574	2.62	1	MRI(+)/cytology(-)<MRI(-)/cytology(-)
3392	307.176	8.51	0.65	0.659574	4.15	1	MRI(+)/cytology(-)<MRI(-)/cytology(-)
3396	308.116	8.81	0.65	0.659574	2.7	0	MRI(+)/cytology(-)>MRI(-)/cytology(-)
3596	336.845	23.01	0.65	0.659574	4.41	1	MRI(+)/cytology(-)<MRI(-)/cytology(-)
3685	345.23	8.15	0.65	0.659574	3.98	1	MRI(+)/cytology(-)<MRI(-)/cytology(-)
3876	362.924	20.63	0.65	0.659574	2.425	1	MRI(+)/cytology(-)<MRI(-)/cytology(-)
3898	362.927	21.83	0.65	0.659574	2.23	0	MRI(+)/cytology(-)<MRI(-)/cytology(-)
4153	391.189	8.51	0.65	0.659574	3.33	1	MRI(+)/cytology(-)<MRI(-)/cytology(-)
4234	395.135	8.02	0.65	0.659574	2.12	1	MRI(+)/cytology(-)>MRI(-)/cytology(-)
4254	398.244	12.87	0.65	0.659574	3.21	1	MRI(+)/cytology(-)>MRI(-)/cytology(-)
4413	418.077	2.12	0.65	0.659574	3.49	1	MRI(+)/cytology(-)>MRI(-)/cytology(-)
4435	425.177	8.54	0.65	0.659574	2.855	1	MRI(+)/cytology(-)<MRI(-)/cytology(-)
4673	448.276	8.59	0.65	0.659574	3.65	1	MRI(+)/cytology(-)<MRI(-)/cytology(-)
4960	485.217	10.28	0.65	0.659574	2.34	1	MRI(+)/cytology(-)>MRI(-)/cytology(-)
5260	525.286	9.66	0.65	0.659574	4.28	1	MRI(+)/cytology(-)>MRI(-)/cytology(-)
5402	544.337	13.35	0.65	0.659574	3.895	1	MRI(+)/cytology(-)<MRI(-)/cytology(-)
5470	559.13	17.32	0.65	0.659574	4.405	1	MRI(+)/cytology(-)>MRI(-)/cytology(-)
5533	566.887	1.71	0.65	0.659574	5.6	1	MRI(+)/cytology(-)>MRI(-)/cytology(-)
5599	570.313	8.8	0.65	0.659574	4.04	1	MRI(+)/cytology(-)<MRI(-)/cytology(-)
5854	629.332	9.21	0.65	0.659574	2.27	0	MRI(+)/cytology(-)>MRI(-)/cytology(-)
5864	634.871	19.87	0.65	0.659574	1.545	0	MRI(+)/cytology(-)<MRI(-)/cytology(-)
5873	634.873	20.54	0.65	0.659574	1.37	0	MRI(+)/cytology(-)<MRI(-)/cytology(-)
6107	702.397	10	0.65	0.659574	2.23	0	MRI(+)/cytology(-)>MRI(-)/cytology(-)
6315	839.336	1.61	0.65	0.659574	5.12	1	MRI(+)/cytology(-)>MRI(-)/cytology(-)
6394	873.843	1.67	0.65	0.659574	4.86	1	MRI(+)/cytology(-)>MRI(-)/cytology(-)
6426	923.769	19.52	0.65	0.659574	3.625	0	MRI(+)/cytology(-)>MRI(-)/cytology(-)
6439	940.821	1.64	0.65	0.659574	5.51	1	MRI(+)/cytology(-)>MRI(-)/cytology(-)
6535	1110.79	1.66	0.65	0.659574	5.69	1	MRI(+)/cytology(-)>MRI(-)/cytology(-)
6541	1111.28	1.71	0.65	0.659574	4.99	1	MRI(+)/cytology(-)>MRI(-)/cytology(-)
233	71.93	23.69	0.5	0.808511	4.84	1	MRI(+)/cytology(-)>MRI(-)/cytology(-)
273	81.5217	22.98	0.5	0.808511	3.95	1	MRI(+)/cytology(-)>MRI(-)/cytology(-)
782	105.034	7.91	0.5	0.808511	3.47	1	MRI(+)/cytology(-)>MRI(-)/cytology(-)
924	121.082	7.86	0.5	0.808511	4.115	1	MRI(+)/cytology(-)>MRI(-)/cytology(-)
1721	172.861	23.61	0.5	0.808511	5.42	1	MRI(+)/cytology(-)<MRI(-)/cytology(-)
1798	174.186	9.28	0.5	0.808511	2.475	1	MRI(+)/cytology(-)<MRI(-)/cytology(-)
2057	205.029	3.85	0.5	0.808511	4.8	1	MRI(+)/cytology(-)>MRI(-)/cytology(-)
3256	302.306	10.73	0.5	0.808511	4.07	1	MRI(+)/cytology(-)<MRI(-)/cytology(-)
3462	318.794	23.48	0.5	0.808511	5.57	1	MRI(+)/cytology(-)<MRI(-)/cytology(-)
3513	327.201	8.47	0.5	0.808511	4.28	1	MRI(+)/cytology(-)<MRI(-)/cytology(-)
3914	362.928	22.73	0.5	0.808511	3.61	1	MRI(+)/cytology(-)<MRI(-)/cytology(-)
3943	365.178	8.91	0.5	0.808511	3.8	1	MRI(+)/cytology(-)<MRI(-)/cytology(-)
4142	389.257	8.83	0.5	0.808511	3.32	1	MRI(+)/cytology(-)<MRI(-)/cytology(-)
4154	391.189	7.91	0.5	0.808511	2.98	1	MRI(+)/cytology(-)>MRI(-)/cytology(-)
4511	430.924	8.11	0.5	0.808511	2.94	1	MRI(+)/cytology(-)>MRI(-)/cytology(-)
4857	478.312	8.49	0.5	0.808511	3.37	0	MRI(+)/cytology(-)<MRI(-)/cytology(-)
5137	505.337	8.56	0.5	0.808511	3.925	1	MRI(+)/cytology(-)<MRI(-)/cytology(-)
5409	547.188	10.85	0.5	0.808511	1.55	0	MRI(+)/cytology(-)>MRI(-)/cytology(-)
5446	549.366	8.61	0.5	0.808511	3.715	1	MRI(+)/cytology(-)<MRI(-)/cytology(-)
5641	580.357	8.69	0.5	0.808511	2.945	1	MRI(+)/cytology(-)<MRI(-)/cytology(-)
5905	634.882	22.73	0.5	0.808511	3.31	1	MRI(+)/cytology(-)<MRI(-)/cytology(-)
5978	653.414	8.7	0.5	0.808511	3.43	1	MRI(+)/cytology(-)<MRI(-)/cytology(-)
1531	155.089	7.91	0.35	0.957447	3.3	1	MRI(+)/cytology(-)>MRI(-)/cytology(-)
1717	172.098	8.88	0.35	0.957447	3.17	1	MRI(+)/cytology(-)>MRI(-)/cytology(-)
1793	174.185	8.23	0.35	0.957447	4.225	0	MRI(+)/cytology(-)>MRI(-)/cytology(-)
1809	175.071	7.98	0.35	0.957447	3.33	1	MRI(+)/cytology(-)>MRI(-)/cytology(-)
1932	193.094	8.18	0.35	0.957447	3.955	1	MRI(+)/cytology(-)>MRI(-)/cytology(-)
1948	194.096	8.54	0.35	0.957447	3.12	1	MRI(+)/cytology(-)>MRI(-)/cytology(-)
2308	219.212	8.25	0.35	0.957447	4.175	1	MRI(+)/cytology(-)>MRI(-)/cytology(-)
2507	235.18	7.73	0.35	0.957447	4.24	1	MRI(+)/cytology(-)>MRI(-)/cytology(-)
5999	657.366	8.52	0.35	0.957447	5.3	1	MRI(+)/cytology(-)>MRI(-)/cytology(-)
6019	659.373	8.53	0.35	0.957447	4.21	0	MRI(+)/cytology(-)>MRI(-)/cytology(-)
6248	779.868	7.98	0.35	0.957447	3.005	1	MRI(+)/cytology(-)>MRI(-)/cytology(-)
49	59.0513	8.47	0.9	0.404255	4.32	1	MRI(+)/cytology(-)>MRI(-)/cytology(-)
293	82.0529	22.68	0.9	0.404255	3.285	1	MRI(+)/cytology(-)>MRI(-)/cytology(-)
330	82.054	16.73	0.9	0.404255	3.38	1	MRI(+)/cytology(-)>MRI(-)/cytology(-)
467	91.0549	18.06	0.9	0.404255	3.905	1	MRI(+)/cytology(-)>MRI(-)/cytology(-)
1884	188.071	7.97	0.9	0.404255	4.17	1	MRI(+)/cytology(-)<MRI(-)/cytology(-)
1972	195.122	7.89	0.9	0.404255	4.745	1	MRI(+)/cytology(-)<MRI(-)/cytology(-)
1999	198.939	1.33	0.9	0.404255	4.84	1	MRI(+)/cytology(-)<MRI(-)/cytology(-)
2034	202.215	9.15	0.9	0.404255	5.245	1	MRI(+)/cytology(-)<MRI(-)/cytology(-)
2794	261.13	7.9	0.9	0.404255	5.47	1	MRI(+)/cytology(-)<MRI(-)/cytology(-)
3132	285.211	8.16	0.9	0.404255	4.39	1	MRI(+)/cytology(-)<MRI(-)/cytology(-)
3267	303.144	7.9	0.9	0.404255	4.46	1	MRI(+)/cytology(-)<MRI(-)/cytology(-)
3417	313.235	14.28	0.9	0.404255	4.785	1	MRI(+)/cytology(-)>MRI(-)/cytology(-)
3465	319.223	14.21	0.9	0.404255	4.55	1	MRI(+)/cytology(-)>MRI(-)/cytology(-)
3529	328.207	8.77	0.9	0.404255	3.4	1	MRI(+)/cytology(-)<MRI(-)/cytology(-)
3542	328.233	8	0.9	0.404255	5.415	1	MRI(+)/cytology(-)<MRI(-)/cytology(-)
4141	389.257	8.59	0.9	0.404255	3.79	1	MRI(+)/cytology(-)<MRI(-)/cytology(-)
4195	393.21	8.17	0.9	0.404255	6.055	1	MRI(+)/cytology(-)<MRI(-)/cytology(-)
4519	432.241	11.97	0.9	0.404255	4.39	1	MRI(+)/cytology(-)<MRI(-)/cytology(-)
4653	439.242	8.64	0.9	0.404255	3.73	1	MRI(+)/cytology(-)<MRI(-)/cytology(-)
4753	460.313	8.32	0.9	0.404255	6.13	1	MRI(+)/cytology(-)<MRI(-)/cytology(-)
4770	461.315	8.35	0.9	0.404255	4.91	0	MRI(+)/cytology(-)<MRI(-)/cytology(-)
4801	475.324	8.66	0.9	0.404255	3.98	1	MRI(+)/cytology(-)<MRI(-)/cytology(-)
4943	483.27	8.31	0.9	0.404255	5.23	1	MRI(+)/cytology(-)<MRI(-)/cytology(-)
4944	483.27	8.77	0.9	0.404255	3.59	1	MRI(+)/cytology(-)<MRI(-)/cytology(-)
4945	483.271	8.71	0.9	0.404255	3.605	1	MRI(+)/cytology(-)<MRI(-)/cytology(-)
5028	498.255	8.7	0.9	0.404255	3.29	1	MRI(+)/cytology(-)<MRI(-)/cytology(-)
5141	505.341	9.32	0.9	0.404255	3.4	1	MRI(+)/cytology(-)<MRI(-)/cytology(-)
5569	567.354	8.48	0.9	0.404255	4.185	1	MRI(+)/cytology(-)<MRI(-)/cytology(-)
5614	571.316	8.89	0.9	0.404255	3.42	1	MRI(+)/cytology(-)<MRI(-)/cytology(-)
5665	585.311	8.75	0.9	0.404255	3.475	1	MRI(+)/cytology(-)<MRI(-)/cytology(-)
5831	624.377	8.74	0.9	0.404255	3.445	1	MRI(+)/cytology(-)<MRI(-)/cytology(-)
5918	635.385	9.09	0.9	0.404255	2.835	1	MRI(+)/cytology(-)<MRI(-)/cytology(-)
510	98.9608	22.93	0.75	0.553191	4.55	1	MRI(+)/cytology(-)>MRI(-)/cytology(-)
648	102.129	16.54	0.75	0.553191	5.855	1	MRI(+)/cytology(-)<MRI(-)/cytology(-)
655	102.129	19.08	0.75	0.553191	5.21	1	MRI(+)/cytology(-)<MRI(-)/cytology(-)
677	102.129	21.42	0.75	0.553191	5.4	1	MRI(+)/cytology(-)<MRI(-)/cytology(-)
720	102.129	15.65	0.75	0.553191	5.515	1	MRI(+)/cytology(-)<MRI(-)/cytology(-)
734	102.129	24.01	0.75	0.553191	5.205	1	MRI(+)/cytology(-)<MRI(-)/cytology(-)
947	122.096	17.56	0.75	0.553191	4.735	1	MRI(+)/cytology(-)>MRI(-)/cytology(-)
1438	141.957	23.54	0.75	0.553191	5.11	1	MRI(+)/cytology(-)>MRI(-)/cytology(-)
1574	158.964	21.92	0.75	0.553191	3.25	1	MRI(+)/cytology(-)<MRI(-)/cytology(-)
1593	159.116	10.53	0.75	0.553191	4.41	1	MRI(+)/cytology(-)<MRI(-)/cytology(-)
1753	173.078	7.75	0.75	0.553191	4.29	1	MRI(+)/cytology(-)<MRI(-)/cytology(-)
1861	186.219	9.2	0.75	0.553191	3.3	1	MRI(+)/cytology(-)>MRI(-)/cytology(-)
1997	198.073	7.88	0.75	0.553191	2.54	1	MRI(+)/cytology(-)<MRI(-)/cytology(-)
2038	202.216	9	0.75	0.553191	5.11	1	MRI(+)/cytology(-)<MRI(-)/cytology(-)
2047	203.217	8.95	0.75	0.553191	3.635	0	MRI(+)/cytology(-)>MRI(-)/cytology(-)
2103	214.251	19.17	0.75	0.553191	3.71	1	MRI(+)/cytology(-)<MRI(-)/cytology(-)
2430	228.232	14.94	0.75	0.553191	4.33	1	MRI(+)/cytology(-)<MRI(-)/cytology(-)
2460	230.248	9.74	0.75	0.553191	5.88	1	MRI(+)/cytology(-)>MRI(-)/cytology(-)
2676	247.866	23.47	0.75	0.553191	4.84	1	MRI(+)/cytology(-)<MRI(-)/cytology(-)
2912	262.238	9.05	0.75	0.553191	4.22	1	MRI(+)/cytology(-)>MRI(-)/cytology(-)
2944	271.187	12.46	0.75	0.553191	4.19	1	MRI(+)/cytology(-)<MRI(-)/cytology(-)
3387	307.114	8.89	0.75	0.553191	3.295	1	MRI(+)/cytology(-)>MRI(-)/cytology(-)
3408	311.184	12.44	0.75	0.553191	4.73	1	MRI(+)/cytology(-)<MRI(-)/cytology(-)
3477	321.152	8.02	0.75	0.553191	5.15	1	MRI(+)/cytology(-)<MRI(-)/cytology(-)
3547	328.234	9.12	0.75	0.553191	3.5	1	MRI(+)/cytology(-)<MRI(-)/cytology(-)
4140	389.256	9.81	0.75	0.553191	3.72	1	MRI(+)/cytology(-)<MRI(-)/cytology(-)
4292	408.308	17.23	0.75	0.553191	4.15	1	MRI(+)/cytology(-)>MRI(-)/cytology(-)
4360	415.211	12.67	0.75	0.553191	4.9	1	MRI(+)/cytology(-)<MRI(-)/cytology(-)
4695	453.228	9.04	0.75	0.553191	3.86	1	MRI(+)/cytology(-)<MRI(-)/cytology(-)
5325	531.015	1.5	0.75	0.553191	3.94	1	MRI(+)/cytology(-)>MRI(-)/cytology(-)
5825	622.759	22.94	0.75	0.553191	4.8	1	MRI(+)/cytology(-)<MRI(-)/cytology(-)
6072	696.436	8.74	0.75	0.553191	4.94	1	MRI(+)/cytology(-)<MRI(-)/cytology(-)
6370	854.728	19.46	0.75	0.553191	3.26	0	MRI(+)/cytology(-)>MRI(-)/cytology(-)
6464	975.304	1.64	0.75	0.553191	5.03	1	MRI(+)/cytology(-)>MRI(-)/cytology(-)
168	59.0527	8.99	0.6	0.702128	5.39	1	MRI(+)/cytology(-)>MRI(-)/cytology(-)
185	61.0101	22.92	0.6	0.702128	4.225	1	MRI(+)/cytology(-)>MRI(-)/cytology(-)
616	102.128	18.32	0.6	0.702128	5.35	1	MRI(+)/cytology(-)<MRI(-)/cytology(-)
697	102.129	13.39	0.6	0.702128	5.245	1	MRI(+)/cytology(-)<MRI(-)/cytology(-)
1334	136.047	1.78	0.6	0.702128	4.56	1	MRI(+)/cytology(-)>MRI(-)/cytology(-)
1338	136.111	18.19	0.6	0.702128	4.03	1	MRI(+)/cytology(-)>MRI(-)/cytology(-)
1946	194.095	8.45	0.6	0.702128	3.305	1	MRI(+)/cytology(-)>MRI(-)/cytology(-)
2358	226.859	23.02	0.6	0.702128	4.42	1	MRI(+)/cytology(-)<MRI(-)/cytology(-)
2526	238.105	9.26	0.6	0.702128	3.12	1	MRI(+)/cytology(-)<MRI(-)/cytology(-)
2537	239.144	8.65	0.6	0.702128	3.94	1	MRI(+)/cytology(-)<MRI(-)/cytology(-)
2705	250.179	11.54	0.6	0.702128	5.11	1	MRI(+)/cytology(-)>MRI(-)/cytology(-)
3048	282.908	22.95	0.6	0.702128	4.645	1	MRI(+)/cytology(-)<MRI(-)/cytology(-)
3432	316.247	9.62	0.6	0.702128	2.71	1	MRI(+)/cytology(-)<MRI(-)/cytology(-)
3708	348.725	8.96	0.6	0.702128	2.44	0	MRI(+)/cytology(-)<MRI(-)/cytology(-)
3795	351.187	8.77	0.6	0.702128	3.73	1	MRI(+)/cytology(-)<MRI(-)/cytology(-)
4054	376.32	17.06	0.6	0.702128	4.265	1	MRI(+)/cytology(-)>MRI(-)/cytology(-)
4136	389.255	8.96	0.6	0.702128	3.51	1	MRI(+)/cytology(-)<MRI(-)/cytology(-)
4236	395.215	8.83	0.6	0.702128	3.69	1	MRI(+)/cytology(-)<MRI(-)/cytology(-)
4461	430.815	22.98	0.6	0.702128	4.415	1	MRI(+)/cytology(-)<MRI(-)/cytology(-)
4631	438.236	8.99	0.6	0.702128	3.75	1	MRI(+)/cytology(-)<MRI(-)/cytology(-)
4751	460.312	8.55	0.6	0.702128	4.045	0	MRI(+)/cytology(-)<MRI(-)/cytology(-)
5012	497.235	8.58	0.6	0.702128	2.765	1	MRI(+)/cytology(-)<MRI(-)/cytology(-)
5358	536.329	8.92	0.6	0.702128	3.2	1	MRI(+)/cytology(-)<MRI(-)/cytology(-)
5380	541.273	8.48	0.6	0.702128	3.595	0	MRI(+)/cytology(-)<MRI(-)/cytology(-)
5506	566.358	8.58	0.6	0.702128	3.88	1	MRI(+)/cytology(-)<MRI(-)/cytology(-)
5536	566.887	21.01	0.6	0.702128	1.875	0	MRI(+)/cytology(-)>MRI(-)/cytology(-)
5565	566.891	20.04	0.6	0.702128	2.055	0	MRI(+)/cytology(-)>MRI(-)/cytology(-)
5594	569.316	9.95	0.6	0.702128	4.21	1	MRI(+)/cytology(-)<MRI(-)/cytology(-)
5617	571.321	8.79	0.6	0.702128	3.37	1	MRI(+)/cytology(-)<MRI(-)/cytology(-)
5635	580.351	8.56	0.6	0.702128	4.51	1	MRI(+)/cytology(-)<MRI(-)/cytology(-)
5710	593.388	8.68	0.6	0.702128	3.19	1	MRI(+)/cytology(-)<MRI(-)/cytology(-)
5773	610.388	8.93	0.6	0.702128	2.225	0	MRI(+)/cytology(-)<MRI(-)/cytology(-)
5964	652.412	8.86	0.6	0.702128	4.26	1	MRI(+)/cytology(-)<MRI(-)/cytology(-)
6214	770.85	19.47	0.6	0.702128	1.82	0	MRI(+)/cytology(-)>MRI(-)/cytology(-)
6408	906.827	1.64	0.6	0.702128	5.48	1	MRI(+)/cytology(-)>MRI(-)/cytology(-)
245	72.0827	2.33	0.45	0.851064	4.57	1	MRI(+)/cytology(-)>MRI(-)/cytology(-)
253	72.9393	23.46	0.45	0.851064	6.07	1	MRI(+)/cytology(-)>MRI(-)/cytology(-)
469	91.0549	21.9	0.45	0.851064	5.345	1	MRI(+)/cytology(-)>MRI(-)/cytology(-)
686	102.129	21.93	0.45	0.851064	4.38	1	MRI(+)/cytology(-)<MRI(-)/cytology(-)
710	102.129	22.33	0.45	0.851064	4.56	1	MRI(+)/cytology(-)<MRI(-)/cytology(-)
1313	136.021	17.25	0.45	0.851064	5.14	1	MRI(+)/cytology(-)>MRI(-)/cytology(-)
1463	144.174	9.57	0.45	0.851064	1.935	1	MRI(+)/cytology(-)<MRI(-)/cytology(-)
1502	149.024	19.17	0.45	0.851064	4.965	1	MRI(+)/cytology(-)>MRI(-)/cytology(-)
1791	174.185	8.9	0.45	0.851064	2.42	1	MRI(+)/cytology(-)<MRI(-)/cytology(-)
2037	202.216	9.69	0.45	0.851064	3.39	1	MRI(+)/cytology(-)<MRI(-)/cytology(-)
2180	217.104	17.26	0.45	0.851064	5.45	1	MRI(+)/cytology(-)>MRI(-)/cytology(-)
2753	257.852	23.49	0.45	0.851064	4.52	1	MRI(+)/cytology(-)<MRI(-)/cytology(-)
2761	258.849	23.5	0.45	0.851064	4.7	1	MRI(+)/cytology(-)<MRI(-)/cytology(-)
4218	394.21	8.68	0.45	0.851064	3.48	1	MRI(+)/cytology(-)<MRI(-)/cytology(-)
5602	570.318	8.8	0.45	0.851064	3.76	1	MRI(+)/cytology(-)<MRI(-)/cytology(-)
5636	580.353	8.58	0.45	0.851064	3.055	1	MRI(+)/cytology(-)<MRI(-)/cytology(-)
5768	609.392	8.8	0.45	0.851064	3.05	1	MRI(+)/cytology(-)<MRI(-)/cytology(-)
5927	636.415	8.71	0.45	0.851064	3.19	1	MRI(+)/cytology(-)<MRI(-)/cytology(-)
6240	777.858	8.01	0.45	0.851064	2.835	0	MRI(+)/cytology(-)>MRI(-)/cytology(-)
1487	146.06	7.67	0.3	1	3.08	1	MRI(+)/cytology(-)>MRI(-)/cytology(-)
2530	239.123	8.38	0.3	1	3.78	1	MRI(+)/cytology(-)>MRI(-)/cytology(-)
3086	283.176	7.81	0.3	1	3.66	1	MRI(+)/cytology(-)>MRI(-)/cytology(-)
3373	306.16	7.85	0.3	1	2.955	1	MRI(+)/cytology(-)>MRI(-)/cytology(-)
3725	349.182	7.94	0.3	1	4.175	1	MRI(+)/cytology(-)>MRI(-)/cytology(-)
3853	360.221	7.89	0.3	1	4.065	1	MRI(+)/cytology(-)>MRI(-)/cytology(-)
3860	360.223	7.9	0.3	1	4.295	1	MRI(+)/cytology(-)>MRI(-)/cytology(-)
3954	366.18	7.82	0.3	1	3.345	1	MRI(+)/cytology(-)>MRI(-)/cytology(-)
3997	371.228	8.09	0.3	1	5.01	1	MRI(+)/cytology(-)>MRI(-)/cytology(-)
4014	372.235	8.03	0.3	1	4.105	1	MRI(+)/cytology(-)>MRI(-)/cytology(-)
4120	388.254	7.81	0.3	1	3.19	1	MRI(+)/cytology(-)>MRI(-)/cytology(-)
4177	393.208	8.06	0.3	1	4.895	1	MRI(+)/cytology(-)>MRI(-)/cytology(-)
4199	393.211	8.1	0.3	1	5.24	1	MRI(+)/cytology(-)>MRI(-)/cytology(-)
4219	394.21	8.11	0.3	1	5.02	1	MRI(+)/cytology(-)>MRI(-)/cytology(-)
4225	394.213	8.1	0.3	1	4.555	1	MRI(+)/cytology(-)>MRI(-)/cytology(-)
4227	394.213	8.05	0.3	1	4.185	1	MRI(+)/cytology(-)>MRI(-)/cytology(-)
4242	395.219	8.1	0.3	1	4.365	1	MRI(+)/cytology(-)>MRI(-)/cytology(-)
4375	416.255	8.14	0.3	1	4.95	1	MRI(+)/cytology(-)>MRI(-)/cytology(-)
4384	416.283	8.1	0.3	1	5.585	1	MRI(+)/cytology(-)>MRI(-)/cytology(-)
4418	418.291	8.06	0.3	1	3.31	0	MRI(+)/cytology(-)>MRI(-)/cytology(-)
4556	433.283	8.12	0.3	1	5.185	1	MRI(+)/cytology(-)>MRI(-)/cytology(-)
4615	437.236	8.17	0.3	1	5.695	1	MRI(+)/cytology(-)>MRI(-)/cytology(-)
4639	438.239	8.17	0.3	1	5.26	1	MRI(+)/cytology(-)>MRI(-)/cytology(-)
4656	439.245	8.18	0.3	1	4.785	1	MRI(+)/cytology(-)>MRI(-)/cytology(-)
4683	449.279	8.03	0.3	1	4.225	1	MRI(+)/cytology(-)>MRI(-)/cytology(-)
4687	453.209	8.11	0.3	1	4.62	1	MRI(+)/cytology(-)>MRI(-)/cytology(-)
4693	453.228	8.1	0.3	1	5.295	1	MRI(+)/cytology(-)>MRI(-)/cytology(-)
4697	453.23	8.01	0.3	1	4.99	1	MRI(+)/cytology(-)>MRI(-)/cytology(-)
4766	461.313	8.14	0.3	1	4.83	1	MRI(+)/cytology(-)>MRI(-)/cytology(-)
4848	478.307	8.23	0.3	1	4.91	1	MRI(+)/cytology(-)>MRI(-)/cytology(-)
4927	482.264	8.2	0.3	1	5.63	1	MRI(+)/cytology(-)>MRI(-)/cytology(-)
4939	483.265	8.21	0.3	1	4.715	1	MRI(+)/cytology(-)>MRI(-)/cytology(-)
4982	492.302	8.13	0.3	1	4.64	1	MRI(+)/cytology(-)>MRI(-)/cytology(-)
4992	493.303	8.09	0.3	1	4.19	0	MRI(+)/cytology(-)>MRI(-)/cytology(-)
5015	497.253	8.17	0.3	1	5.31	1	MRI(+)/cytology(-)>MRI(-)/cytology(-)
5029	498.255	8.14	0.3	1	4.095	1	MRI(+)/cytology(-)>MRI(-)/cytology(-)
5195	520.331	8.28	0.3	1	5.235	1	MRI(+)/cytology(-)>MRI(-)/cytology(-)
5366	537.327	8.18	0.3	1	3.76	0	MRI(+)/cytology(-)>MRI(-)/cytology(-)
5637	580.353	8.22	0.3	1	4.665	0	MRI(+)/cytology(-)>MRI(-)/cytology(-)
5666	585.312	8.28	0.3	1	4.835	1	MRI(+)/cytology(-)>MRI(-)/cytology(-)
426	87.9956	1.32	1	0.297872	3.99	1	MRI(+)/cytology(-)>MRI(-)/cytology(-)
435	88.9906	1.33	1	0.297872	4.01	1	MRI(+)/cytology(-)>MRI(-)/cytology(-)
611	102.128	20.54	1	0.297872	5.865	1	MRI(+)/cytology(-)<MRI(-)/cytology(-)
660	102.129	18.6	1	0.297872	5.65	1	MRI(+)/cytology(-)<MRI(-)/cytology(-)
1474	145.015	1.35	1	0.297872	4.825	1	MRI(+)/cytology(-)<MRI(-)/cytology(-)
2317	219.22	8.42	1	0.297872	2.355	1	MRI(+)/cytology(-)>MRI(-)/cytology(-)
447	90.9778	1.65	0.85	0.446809	4.26	1	MRI(+)/cytology(-)>MRI(-)/cytology(-)
673	102.129	20.51	0.85	0.446809	5.5	1	MRI(+)/cytology(-)<MRI(-)/cytology(-)
1917	192.08	9.26	0.85	0.446809	2.84	1	MRI(+)/cytology(-)>MRI(-)/cytology(-)
2643	246.859	23.63	0.85	0.446809	5.12	1	MRI(+)/cytology(-)<MRI(-)/cytology(-)
2955	273.168	10.39	0.85	0.446809	4.14	1	MRI(+)/cytology(-)<MRI(-)/cytology(-)
3095	284.174	8.14	0.85	0.446809	4.4	1	MRI(+)/cytology(-)<MRI(-)/cytology(-)
3189	295.226	12.42	0.85	0.446809	3.98	1	MRI(+)/cytology(-)<MRI(-)/cytology(-)
3374	306.16	9.7	0.85	0.446809	3.41	1	MRI(+)/cytology(-)<MRI(-)/cytology(-)
3439	318.164	8.59	0.85	0.446809	4.82	1	MRI(+)/cytology(-)<MRI(-)/cytology(-)
3564	329.236	8.13	0.85	0.446809	4.125	1	MRI(+)/cytology(-)<MRI(-)/cytology(-)
3794	351.119	7.98	0.85	0.446809	2.64	1	MRI(+)/cytology(-)>MRI(-)/cytology(-)
4245	397.23	19.05	0.85	0.446809	3.79	1	MRI(+)/cytology(-)>MRI(-)/cytology(-)
4715	455.178	7.74	0.85	0.446809	2.54	1	MRI(+)/cytology(-)<MRI(-)/cytology(-)
4840	477.31	8.38	0.85	0.446809	5.655	1	MRI(+)/cytology(-)<MRI(-)/cytology(-)
4850	478.308	8.38	0.85	0.446809	4.87	1	MRI(+)/cytology(-)<MRI(-)/cytology(-)
4866	479.24	8.86	0.85	0.446809	2.93	1	MRI(+)/cytology(-)<MRI(-)/cytology(-)
5008	497.226	8.33	0.85	0.446809	4.09	0	MRI(+)/cytology(-)<MRI(-)/cytology(-)
5385	541.279	8.35	0.85	0.446809	4.99	1	MRI(+)/cytology(-)<MRI(-)/cytology(-)
5416	547.332	8.74	0.85	0.446809	4.175	1	MRI(+)/cytology(-)<MRI(-)/cytology(-)
5460	550.368	8.84	0.85	0.446809	2.43	1	MRI(+)/cytology(-)<MRI(-)/cytology(-)
6026	669.372	1.64	0.85	0.446809	4.03	1	MRI(+)/cytology(-)>MRI(-)/cytology(-)
6103	702.395	8.72	0.85	0.446809	4.58	1	MRI(+)/cytology(-)<MRI(-)/cytology(-)
6349	853.729	18.81	0.85	0.446809	3.605	1	MRI(+)/cytology(-)>MRI(-)/cytology(-)
6455	957.476	1.63	0.85	0.446809	4.59	1	MRI(+)/cytology(-)>MRI(-)/cytology(-)
6530	1088.13	1.61	0.85	0.446809	4.67	1	MRI(+)/cytology(-)>MRI(-)/cytology(-)
584	102.127	14.51	0.7	0.595745	5.395	1	MRI(+)/cytology(-)<MRI(-)/cytology(-)
591	102.127	22.77	0.7	0.595745	5.165	1	MRI(+)/cytology(-)<MRI(-)/cytology(-)
605	102.128	20.27	0.7	0.595745	4.93	1	MRI(+)/cytology(-)<MRI(-)/cytology(-)
688	102.129	16.22	0.7	0.595745	5.38	1	MRI(+)/cytology(-)<MRI(-)/cytology(-)
691	102.129	12.8	0.7	0.595745	5.34	1	MRI(+)/cytology(-)<MRI(-)/cytology(-)
717	102.129	28.01	0.7	0.595745	4.63	1	MRI(+)/cytology(-)<MRI(-)/cytology(-)
955	122.096	19.24	0.7	0.595745	4.27	1	MRI(+)/cytology(-)<MRI(-)/cytology(-)
980	122.097	20.53	0.7	0.595745	4.43	1	MRI(+)/cytology(-)<MRI(-)/cytology(-)
1042	123.083	18.64	0.7	0.595745	4.77	1	MRI(+)/cytology(-)>MRI(-)/cytology(-)
1079	124.086	8.11	0.7	0.595745	3.64	1	MRI(+)/cytology(-)>MRI(-)/cytology(-)
1163	124.087	15.32	0.7	0.595745	4.975	1	MRI(+)/cytology(-)>MRI(-)/cytology(-)
1220	124.963	18.39	0.7	0.595745	3.99	1	MRI(+)/cytology(-)>MRI(-)/cytology(-)
1263	128.024	1.35	0.7	0.595745	4.7	1	MRI(+)/cytology(-)<MRI(-)/cytology(-)
1895	190.086	8.18	0.7	0.595745	2.68	1	MRI(+)/cytology(-)>MRI(-)/cytology(-)
1936	193.095	8	0.7	0.595745	3.58	1	MRI(+)/cytology(-)>MRI(-)/cytology(-)
2017	200.237	10.09	0.7	0.595745	4.69	1	MRI(+)/cytology(-)<MRI(-)/cytology(-)
2366	226.95	20.52	0.7	0.595745	2.65	1	MRI(+)/cytology(-)<MRI(-)/cytology(-)
2636	246.243	9.32	0.7	0.595745	4.175	1	MRI(+)/cytology(-)<MRI(-)/cytology(-)
2854	261.132	20.52	0.7	0.595745	5.25	1	MRI(+)/cytology(-)<MRI(-)/cytology(-)
3025	278.038	9.6	0.7	0.595745	2.61	1	MRI(+)/cytology(-)<MRI(-)/cytology(-)
3411	311.293	16.3	0.7	0.595745	5.035	1	MRI(+)/cytology(-)>MRI(-)/cytology(-)
3929	363.931	1.63	0.7	0.595745	5.025	1	MRI(+)/cytology(-)<MRI(-)/cytology(-)
4223	394.212	8.83	0.7	0.595745	3.55	1	MRI(+)/cytology(-)<MRI(-)/cytology(-)
5466	554.178	17.25	0.7	0.595745	4.71	1	MRI(+)/cytology(-)>MRI(-)/cytology(-)
5777	610.39	8.65	0.7	0.595745	4.505	1	MRI(+)/cytology(-)<MRI(-)/cytology(-)
5850	629.323	8.55	0.7	0.595745	3.65	0	MRI(+)/cytology(-)<MRI(-)/cytology(-)
5883	634.875	21.83	0.7	0.595745	1.65	0	MRI(+)/cytology(-)<MRI(-)/cytology(-)
6177	734.75	22.98	0.7	0.595745	4.245	1	MRI(+)/cytology(-)<MRI(-)/cytology(-)
6416	907.82	1.63	0.7	0.595745	5.27	1	MRI(+)/cytology(-)>MRI(-)/cytology(-)
6536	1110.79	22.63	0.7	0.595745	4.075	1	MRI(+)/cytology(-)<MRI(-)/cytology(-)
27	56.0526	20.28	0.55	0.744681	4.11	1	MRI(+)/cytology(-)<MRI(-)/cytology(-)
593	102.127	16.11	0.55	0.744681	5.375	1	MRI(+)/cytology(-)<MRI(-)/cytology(-)
1722	172.862	23.55	0.55	0.744681	5.33	1	MRI(+)/cytology(-)<MRI(-)/cytology(-)
2025	201.054	2.15	0.55	0.744681	4.41	1	MRI(+)/cytology(-)>MRI(-)/cytology(-)
2156	216.871	23.47	0.55	0.744681	5.01	1	MRI(+)/cytology(-)<MRI(-)/cytology(-)
2295	218.867	23.55	0.55	0.744681	5.77	1	MRI(+)/cytology(-)<MRI(-)/cytology(-)
2692	249.12	8.25	0.55	0.744681	2.785	1	MRI(+)/cytology(-)>MRI(-)/cytology(-)
2925	266.174	11.14	0.55	0.744681	3.56	1	MRI(+)/cytology(-)>MRI(-)/cytology(-)
3176	294.002	2.06	0.55	0.744681	4.96	1	MRI(+)/cytology(-)>MRI(-)/cytology(-)
3555	329.192	8.67	0.55	0.744681	3.85	1	MRI(+)/cytology(-)<MRI(-)/cytology(-)
3592	334.851	22.97	0.55	0.744681	4.6	1	MRI(+)/cytology(-)<MRI(-)/cytology(-)
3826	355.034	2.11	0.55	0.744681	4.685	1	MRI(+)/cytology(-)>MRI(-)/cytology(-)
3827	355.064	2.13	0.55	0.744681	4.755	1	MRI(+)/cytology(-)>MRI(-)/cytology(-)
3900	362.927	20.16	0.55	0.744681	3.12	0	MRI(+)/cytology(-)>MRI(-)/cytology(-)
3995	371.228	8.47	0.55	0.744681	4.39	1	MRI(+)/cytology(-)<MRI(-)/cytology(-)
4197	393.21	8.4	0.55	0.744681	4.72	1	MRI(+)/cytology(-)<MRI(-)/cytology(-)
4310	409.206	8.29	0.55	0.744681	4.755	1	MRI(+)/cytology(-)<MRI(-)/cytology(-)
4353	414.054	9.64	0.55	0.744681	2.36	1	MRI(+)/cytology(-)<MRI(-)/cytology(-)
4554	433.283	8.41	0.55	0.744681	3.905	1	MRI(+)/cytology(-)<MRI(-)/cytology(-)
4632	438.236	8.63	0.55	0.744681	4.07	1	MRI(+)/cytology(-)<MRI(-)/cytology(-)
4665	447.309	12.3	0.55	0.744681	3.395	1	MRI(+)/cytology(-)<MRI(-)/cytology(-)
4750	460.312	8.45	0.55	0.744681	4.635	1	MRI(+)/cytology(-)<MRI(-)/cytology(-)
5092	500.276	12.73	0.55	0.744681	2.79	1	MRI(+)/cytology(-)<MRI(-)/cytology(-)
5223	522.337	8.55	0.55	0.744681	3.79	1	MRI(+)/cytology(-)<MRI(-)/cytology(-)
5552	566.889	1.65	0.55	0.744681	6.35	1	MRI(+)/cytology(-)>MRI(-)/cytology(-)
5660	585.303	8.63	0.55	0.744681	4.52	1	MRI(+)/cytology(-)<MRI(-)/cytology(-)
5749	608.385	8.88	0.55	0.744681	4.145	1	MRI(+)/cytology(-)<MRI(-)/cytology(-)
5802	614.342	8.73	0.55	0.744681	3.3	1	MRI(+)/cytology(-)<MRI(-)/cytology(-)
5879	634.874	20.13	0.55	0.744681	2.56	0	MRI(+)/cytology(-)>MRI(-)/cytology(-)
5909	635.38	8.76	0.55	0.744681	3.375	1	MRI(+)/cytology(-)<MRI(-)/cytology(-)
6086	697.441	8.76	0.55	0.744681	3.745	1	MRI(+)/cytology(-)<MRI(-)/cytology(-)
6154	703.373	1.62	0.55	0.744681	4.92	1	MRI(+)/cytology(-)>MRI(-)/cytology(-)
281	81.9389	23.43	0.4	0.893617	6.1	1	MRI(+)/cytology(-)>MRI(-)/cytology(-)
498	97.9332	23.42	0.4	0.893617	5.32	1	MRI(+)/cytology(-)>MRI(-)/cytology(-)
741	102.129	22.46	0.4	0.893617	4.885	1	MRI(+)/cytology(-)<MRI(-)/cytology(-)
797	106.078	18.96	0.4	0.893617	5.025	1	MRI(+)/cytology(-)>MRI(-)/cytology(-)
861	112.956	23.4	0.4	0.893617	5.21	1	MRI(+)/cytology(-)>MRI(-)/cytology(-)
1088	124.086	22.24	0.4	0.893617	4.84	1	MRI(+)/cytology(-)<MRI(-)/cytology(-)
1248	126.092	8.42	0.4	0.893617	3.63	1	MRI(+)/cytology(-)>MRI(-)/cytology(-)
1440	141.957	23.14	0.4	0.893617	4.66	1	MRI(+)/cytology(-)>MRI(-)/cytology(-)
1519	154.085	8.54	0.4	0.893617	3.195	1	MRI(+)/cytology(-)>MRI(-)/cytology(-)
1695	170.926	22.97	0.4	0.893617	4.32	1	MRI(+)/cytology(-)<MRI(-)/cytology(-)
1775	173.078	8.95	0.4	0.893617	4.01	1	MRI(+)/cytology(-)>MRI(-)/cytology(-)
2000	198.94	22.98	0.4	0.893617	4.875	1	MRI(+)/cytology(-)<MRI(-)/cytology(-)
2158	216.916	22.97	0.4	0.893617	4.83	1	MRI(+)/cytology(-)<MRI(-)/cytology(-)
2673	247.863	23.5	0.4	0.893617	5.31	1	MRI(+)/cytology(-)<MRI(-)/cytology(-)
2675	247.866	23.57	0.4	0.893617	5.48	1	MRI(+)/cytology(-)<MRI(-)/cytology(-)
2678	248.863	23.41	0.4	0.893617	5.11	1	MRI(+)/cytology(-)<MRI(-)/cytology(-)
2763	258.852	23.53	0.4	0.893617	4.955	1	MRI(+)/cytology(-)<MRI(-)/cytology(-)
3577	331.089	1.9	0.4	0.893617	4.58	1	MRI(+)/cytology(-)>MRI(-)/cytology(-)
3973	371.099	3.69	0.4	0.893617	4.45	1	MRI(+)/cytology(-)<MRI(-)/cytology(-)
4194	393.21	8.86	0.4	0.893617	4.245	1	MRI(+)/cytology(-)<MRI(-)/cytology(-)
4250	398.241	12.56	0.4	0.893617	5.175	1	MRI(+)/cytology(-)>MRI(-)/cytology(-)
4307	409.205	8.79	0.4	0.893617	3.765	1	MRI(+)/cytology(-)<MRI(-)/cytology(-)
4988	492.806	23.01	0.4	0.893617	4.315	1	MRI(+)/cytology(-)<MRI(-)/cytology(-)
5481	562.14	7.93	0.4	0.893617	1.52	0	MRI(+)/cytology(-)<MRI(-)/cytology(-)
5684	591.357	8.84	0.4	0.893617	3.39	1	MRI(+)/cytology(-)<MRI(-)/cytology(-)
5746	608.382	9.27	0.4	0.893617	3.93	1	MRI(+)/cytology(-)<MRI(-)/cytology(-)
6132	702.862	22.68	0.4	0.893617	4.57	1	MRI(+)/cytology(-)<MRI(-)/cytology(-)
6289	822.889	8.1	0.4	0.893617	3.23	0	MRI(+)/cytology(-)>MRI(-)/cytology(-)
6557	1152.27	18.85	0.4	0.893617	3.46	0	MRI(+)/cytology(-)>MRI(-)/cytology(-)
33	56.0532	20.59	0.95	0.340426	3.675	1	MRI(+)/cytology(-)>MRI(-)/cytology(-)
672	102.129	20.51	0.95	0.340426	5.91	1	MRI(+)/cytology(-)<MRI(-)/cytology(-)
764	103.13	19.88	0.95	0.340426	4.86	1	MRI(+)/cytology(-)<MRI(-)/cytology(-)
806	107.085	1.81	0.95	0.340426	5.035	1	MRI(+)/cytology(-)>MRI(-)/cytology(-)
813	109.1	10.64	0.95	0.340426	4.15	1	MRI(+)/cytology(-)>MRI(-)/cytology(-)
863	112.957	23.55	0.95	0.340426	5.29	1	MRI(+)/cytology(-)>MRI(-)/cytology(-)
1712	171.113	8.47	0.95	0.340426	3.615	1	MRI(+)/cytology(-)>MRI(-)/cytology(-)
2326	222.867	23.04	0.95	0.340426	5	1	MRI(+)/cytology(-)<MRI(-)/cytology(-)
2372	226.951	1.53	0.95	0.340426	5.73	1	MRI(+)/cytology(-)>MRI(-)/cytology(-)
2985	276.041	9.62	0.95	0.340426	3.23	1	MRI(+)/cytology(-)<MRI(-)/cytology(-)
3017	277.179	14.34	0.95	0.340426	5.51	1	MRI(+)/cytology(-)>MRI(-)/cytology(-)
3168	292.146	7.74	0.95	0.340426	2.34	1	MRI(+)/cytology(-)>MRI(-)/cytology(-)
3635	339.25	13.71	0.95	0.340426	4	1	MRI(+)/cytology(-)<MRI(-)/cytology(-)
3861	360.224	8.05	0.95	0.340426	4.98	1	MRI(+)/cytology(-)<MRI(-)/cytology(-)
3891	362.926	22.69	0.95	0.340426	4.755	1	MRI(+)/cytology(-)<MRI(-)/cytology(-)
4090	384.116	8.35	0.95	0.340426	4.64	1	MRI(+)/cytology(-)<MRI(-)/cytology(-)
4798	474.289	8.33	0.95	0.340426	4.32	1	MRI(+)/cytology(-)<MRI(-)/cytology(-)
5216	522.332	8.78	0.95	0.340426	3.39	1	MRI(+)/cytology(-)<MRI(-)/cytology(-)
5388	541.284	8.28	0.95	0.340426	5.375	1	MRI(+)/cytology(-)<MRI(-)/cytology(-)
5427	548.36	8.34	0.95	0.340426	6.07	1	MRI(+)/cytology(-)<MRI(-)/cytology(-)
5988	654.416	8.64	0.95	0.340426	4.5	1	MRI(+)/cytology(-)<MRI(-)/cytology(-)
300	82.0535	17.52	0.8	0.489362	2.51	1	MRI(+)/cytology(-)>MRI(-)/cytology(-)
358	84.9569	23.08	0.8	0.489362	4.52	1	MRI(+)/cytology(-)>MRI(-)/cytology(-)
729	102.129	14.95	0.8	0.489362	5.815	1	MRI(+)/cytology(-)<MRI(-)/cytology(-)
1771	173.078	7.61	0.8	0.489362	4.3	1	MRI(+)/cytology(-)>MRI(-)/cytology(-)
2202	217.104	15.92	0.8	0.489362	5.36	1	MRI(+)/cytology(-)>MRI(-)/cytology(-)
2356	226.18	11.34	0.8	0.489362	3.38	1	MRI(+)/cytology(-)<MRI(-)/cytology(-)
2417	227.202	13.41	0.8	0.489362	4.39	1	MRI(+)/cytology(-)<MRI(-)/cytology(-)
2750	257.06	9.62	0.8	0.489362	3.14	1	MRI(+)/cytology(-)<MRI(-)/cytology(-)
2930	269.098	16.4	0.8	0.489362	3.75	1	MRI(+)/cytology(-)>MRI(-)/cytology(-)
2946	271.188	11.9	0.8	0.489362	4.685	1	MRI(+)/cytology(-)>MRI(-)/cytology(-)
3040	280.263	15.73	0.8	0.489362	4.61	1	MRI(+)/cytology(-)>MRI(-)/cytology(-)
3583	331.249	11.4	0.8	0.489362	4.83	1	MRI(+)/cytology(-)<MRI(-)/cytology(-)
3843	358.367	11.62	0.8	0.489362	4.665	1	MRI(+)/cytology(-)>MRI(-)/cytology(-)
4046	375.248	15.26	0.8	0.489362	4.9	1	MRI(+)/cytology(-)>MRI(-)/cytology(-)
4073	384.112	8.21	0.8	0.489362	3.97	1	MRI(+)/cytology(-)<MRI(-)/cytology(-)
4776	462.314	8.32	0.8	0.489362	4.365	1	MRI(+)/cytology(-)<MRI(-)/cytology(-)
5112	503.307	8.66	0.8	0.489362	4.63	1	MRI(+)/cytology(-)<MRI(-)/cytology(-)
5119	504.311	8.44	0.8	0.489362	4.88	1	MRI(+)/cytology(-)<MRI(-)/cytology(-)
5434	548.364	8.45	0.8	0.489362	5.27	1	MRI(+)/cytology(-)<MRI(-)/cytology(-)
5704	592.39	8.79	0.8	0.489362	3.745	1	MRI(+)/cytology(-)<MRI(-)/cytology(-)
5724	594.394	8.8	0.8	0.489362	2.625	0	MRI(+)/cytology(-)<MRI(-)/cytology(-)
5969	653.407	8.88	0.8	0.489362	3.015	1	MRI(+)/cytology(-)<MRI(-)/cytology(-)
5997	657.365	8.6	0.8	0.489362	5.65	1	MRI(+)/cytology(-)<MRI(-)/cytology(-)
6057	685.433	18.37	0.8	0.489362	4.59	1	MRI(+)/cytology(-)<MRI(-)/cytology(-)
6079	697.434	8.72	0.8	0.489362	4.41	1	MRI(+)/cytology(-)<MRI(-)/cytology(-)
6428	923.771	20.37	0.8	0.489362	3.42	0	MRI(+)/cytology(-)>MRI(-)/cytology(-)
6525	1077.31	1.67	0.8	0.489362	4.97	1	MRI(+)/cytology(-)>MRI(-)/cytology(-)
6533	1110.78	22.34	0.8	0.489362	2.335	1	MRI(+)/cytology(-)>MRI(-)/cytology(-)
30	56.0527	17.19	0.65	0.638298	3.67	1	MRI(+)/cytology(-)>MRI(-)/cytology(-)
71	59.0516	9.01	0.65	0.638298	4.97	1	MRI(+)/cytology(-)>MRI(-)/cytology(-)
368	85.0394	19.24	0.65	0.638298	2.875	1	MRI(+)/cytology(-)>MRI(-)/cytology(-)
599	102.127	23.75	0.65	0.638298	4.945	1	MRI(+)/cytology(-)<MRI(-)/cytology(-)
644	102.128	21.47	0.65	0.638298	5.6	1	MRI(+)/cytology(-)<MRI(-)/cytology(-)
964	122.096	17.47	0.65	0.638298	4.85	1	MRI(+)/cytology(-)>MRI(-)/cytology(-)
1075	123.101	20.38	0.65	0.638298	4.32	1	MRI(+)/cytology(-)>MRI(-)/cytology(-)
1479	145.048	2.16	0.65	0.638298	4.76	1	MRI(+)/cytology(-)>MRI(-)/cytology(-)
2213	217.105	16.35	0.65	0.638298	5.43	1	MRI(+)/cytology(-)>MRI(-)/cytology(-)
2613	240.181	7.96	0.65	0.638298	3.55	1	MRI(+)/cytology(-)<MRI(-)/cytology(-)
2765	258.882	22.96	0.65	0.638298	4.01	1	MRI(+)/cytology(-)>MRI(-)/cytology(-)
3151	290.27	10.53	0.65	0.638298	3.39	1	MRI(+)/cytology(-)<MRI(-)/cytology(-)
3229	299.087	9.41	0.65	0.638298	3.52	1	MRI(+)/cytology(-)<MRI(-)/cytology(-)
3486	322.153	7.98	0.65	0.638298	3.95	1	MRI(+)/cytology(-)<MRI(-)/cytology(-)
4125	388.254	8.27	0.65	0.638298	5.73	1	MRI(+)/cytology(-)<MRI(-)/cytology(-)
4249	398.234	16.38	0.65	0.638298	3.94	1	MRI(+)/cytology(-)>MRI(-)/cytology(-)
4278	404.247	8.75	0.65	0.638298	3.735	1	MRI(+)/cytology(-)<MRI(-)/cytology(-)
4686	450.323	12.63	0.65	0.638298	3.265	1	MRI(+)/cytology(-)<MRI(-)/cytology(-)
5288	526.291	13.28	0.65	0.638298	4.63	1	MRI(+)/cytology(-)<MRI(-)/cytology(-)
5787	613.339	9.44	0.65	0.638298	3.9	1	MRI(+)/cytology(-)<MRI(-)/cytology(-)
5995	657.365	9.09	0.65	0.638298	3.32	1	MRI(+)/cytology(-)<MRI(-)/cytology(-)
6043	680.441	8.96	0.65	0.638298	2.775	1	MRI(+)/cytology(-)<MRI(-)/cytology(-)
6111	702.857	19.87	0.65	0.638298	1.545	0	MRI(+)/cytology(-)<MRI(-)/cytology(-)
6288	821.89	8.1	0.65	0.638298	3.02	0	MRI(+)/cytology(-)>MRI(-)/cytology(-)
6411	906.83	1.71	0.65	0.638298	6.02	1	MRI(+)/cytology(-)>MRI(-)/cytology(-)
135	59.0522	6.33	0.5	0.787234	5.11	1	MRI(+)/cytology(-)<MRI(-)/cytology(-)
563	102.127	16.76	0.5	0.787234	4.47	1	MRI(+)/cytology(-)<MRI(-)/cytology(-)
607	102.128	20.89	0.5	0.787234	5.28	1	MRI(+)/cytology(-)<MRI(-)/cytology(-)
744	102.129	20.05	0.5	0.787234	5.49	1	MRI(+)/cytology(-)<MRI(-)/cytology(-)
780	105.033	8.42	0.5	0.787234	3.03	1	MRI(+)/cytology(-)>MRI(-)/cytology(-)
801	106.079	19.23	0.5	0.787234	4.875	1	MRI(+)/cytology(-)>MRI(-)/cytology(-)
823	110.06	8.51	0.5	0.787234	2.555	0	MRI(+)/cytology(-)<MRI(-)/cytology(-)
1848	185.114	9.61	0.5	0.787234	4.035	1	MRI(+)/cytology(-)<MRI(-)/cytology(-)
2026	201.109	8.65	0.5	0.787234	3.875	1	MRI(+)/cytology(-)>MRI(-)/cytology(-)
2749	256.855	23.51	0.5	0.787234	5.02	1	MRI(+)/cytology(-)>MRI(-)/cytology(-)
3483	321.316	19.72	0.5	0.787234	4.115	1	MRI(+)/cytology(-)>MRI(-)/cytology(-)
3670	344.228	8.12	0.5	0.787234	4.615	1	MRI(+)/cytology(-)<MRI(-)/cytology(-)
3675	344.228	8.17	0.5	0.787234	4.165	1	MRI(+)/cytology(-)<MRI(-)/cytology(-)
4063	378.901	1.65	0.5	0.787234	5.3	1	MRI(+)/cytology(-)<MRI(-)/cytology(-)
4277	404.246	8.34	0.5	0.787234	3.995	1	MRI(+)/cytology(-)<MRI(-)/cytology(-)
4308	409.205	8.44	0.5	0.787234	4.79	1	MRI(+)/cytology(-)<MRI(-)/cytology(-)
4311	409.207	8.51	0.5	0.787234	4.15	1	MRI(+)/cytology(-)<MRI(-)/cytology(-)
4357	415.058	2.09	0.5	0.787234	4.785	1	MRI(+)/cytology(-)>MRI(-)/cytology(-)
4471	430.912	22.72	0.5	0.787234	3.855	1	MRI(+)/cytology(-)<MRI(-)/cytology(-)
4690	453.226	8.47	0.5	0.787234	4.415	1	MRI(+)/cytology(-)<MRI(-)/cytology(-)
4752	460.313	8.44	0.5	0.787234	4.66	1	MRI(+)/cytology(-)<MRI(-)/cytology(-)
4893	481.26	8.56	0.5	0.787234	5.11	1	MRI(+)/cytology(-)<MRI(-)/cytology(-)
4937	483.264	8.56	0.5	0.787234	3.83	1	MRI(+)/cytology(-)<MRI(-)/cytology(-)
4954	484.281	8.6	0.5	0.787234	2.645	1	MRI(+)/cytology(-)<MRI(-)/cytology(-)
5601	570.318	8.6	0.5	0.787234	3.87	1	MRI(+)/cytology(-)<MRI(-)/cytology(-)
5645	581.353	8.51	0.5	0.787234	2.63	0	MRI(+)/cytology(-)<MRI(-)/cytology(-)
5847	629.317	8.88	0.5	0.787234	1.99	0	MRI(+)/cytology(-)<MRI(-)/cytology(-)
6091	701.391	9.11	0.5	0.787234	3.1	1	MRI(+)/cytology(-)>MRI(-)/cytology(-)
6197	752.722	23.01	0.5	0.787234	3.72	1	MRI(+)/cytology(-)<MRI(-)/cytology(-)
1074	123.1	20.1	0.35	0.93617	4.545	1	MRI(+)/cytology(-)>MRI(-)/cytology(-)
1441	141.958	1.32	0.35	0.93617	4.92	1	MRI(+)/cytology(-)>MRI(-)/cytology(-)
1585	158.964	21.78	0.35	0.93617	2.035	1	MRI(+)/cytology(-)<MRI(-)/cytology(-)
2283	218.21	8.23	0.35	0.93617	4.065	0	MRI(+)/cytology(-)>MRI(-)/cytology(-)
2731	255.066	8.2	0.35	0.93617	3.06	1	MRI(+)/cytology(-)>MRI(-)/cytology(-)
3206	296.181	8.43	0.35	0.93617	3.595	0	MRI(+)/cytology(-)>MRI(-)/cytology(-)
3424	315.156	8.46	0.35	0.93617	3.83	1	MRI(+)/cytology(-)>MRI(-)/cytology(-)
3680	344.878	22.98	0.35	0.93617	4.84	1	MRI(+)/cytology(-)<MRI(-)/cytology(-)
5107	503.306	8.29	0.35	0.93617	5.34	1	MRI(+)/cytology(-)>MRI(-)/cytology(-)
5212	521.336	8.28	0.35	0.93617	5.78	1	MRI(+)/cytology(-)>MRI(-)/cytology(-)
5278	525.289	8.36	0.35	0.93617	5.935	1	MRI(+)/cytology(-)>MRI(-)/cytology(-)
5289	526.291	8.35	0.35	0.93617	5.785	1	MRI(+)/cytology(-)>MRI(-)/cytology(-)
5412	547.329	8.39	0.35	0.93617	5.81	0	MRI(+)/cytology(-)>MRI(-)/cytology(-)
5513	566.363	8.41	0.35	0.93617	5.03	0	MRI(+)/cytology(-)>MRI(-)/cytology(-)
5597	570.312	8.35	0.35	0.93617	5.545	1	MRI(+)/cytology(-)>MRI(-)/cytology(-)
5899	634.877	20	0.35	0.93617	0.88	0	MRI(+)/cytology(-)<MRI(-)/cytology(-)
6252	794.887	7.94	0.35	0.93617	3.07	0	MRI(+)/cytology(-)>MRI(-)/cytology(-)
6395	876.779	7.97	0.35	0.93617	3.14	1	MRI(+)/cytology(-)>MRI(-)/cytology(-)
6404	906.824	22.68	0.35	0.93617	3.32	1	MRI(+)/cytology(-)<MRI(-)/cytology(-)
6501	1042.8	22.66	0.35	0.93617	3.035	1	MRI(+)/cytology(-)<MRI(-)/cytology(-)
65	59.0515	8.45	0.9	0.382979	4.15	1	MRI(+)/cytology(-)>MRI(-)/cytology(-)
68	59.0516	18.44	0.9	0.382979	4.725	1	MRI(+)/cytology(-)>MRI(-)/cytology(-)
182	60.0479	16.73	0.9	0.382979	4.615	1	MRI(+)/cytology(-)>MRI(-)/cytology(-)
391	85.0408	19.12	0.9	0.382979	2.93	1	MRI(+)/cytology(-)>MRI(-)/cytology(-)
404	85.0411	17.72	0.9	0.382979	2.6	1	MRI(+)/cytology(-)>MRI(-)/cytology(-)
523	100.076	7.86	0.9	0.382979	4.01	1	MRI(+)/cytology(-)<MRI(-)/cytology(-)
1037	123.081	8.48	0.9	0.382979	3.745	1	MRI(+)/cytology(-)>MRI(-)/cytology(-)
1893	189.075	8.16	0.9	0.382979	3.01	1	MRI(+)/cytology(-)>MRI(-)/cytology(-)
2032	202.063	2.15	0.9	0.382979	3.69	1	MRI(+)/cytology(-)>MRI(-)/cytology(-)
2150	215.126	8.58	0.9	0.382979	3.77	1	MRI(+)/cytology(-)>MRI(-)/cytology(-)
2294	218.213	8.61	0.9	0.382979	3.715	1	MRI(+)/cytology(-)<MRI(-)/cytology(-)
2536	239.127	8.91	0.9	0.382979	3.795	1	MRI(+)/cytology(-)<MRI(-)/cytology(-)
2580	239.149	8.29	0.9	0.382979	3.95	1	MRI(+)/cytology(-)>MRI(-)/cytology(-)
2720	254.854	23.03	0.9	0.382979	4.57	1	MRI(+)/cytology(-)<MRI(-)/cytology(-)
3003	277.125	7.89	0.9	0.382979	3.285	1	MRI(+)/cytology(-)>MRI(-)/cytology(-)
3213	296.255	9.68	0.9	0.382979	4.58	1	MRI(+)/cytology(-)<MRI(-)/cytology(-)
3251	302.145	14.72	0.9	0.382979	4.89	1	MRI(+)/cytology(-)>MRI(-)/cytology(-)
3442	318.167	8.51	0.9	0.382979	4.755	1	MRI(+)/cytology(-)<MRI(-)/cytology(-)
3531	328.224	8.01	0.9	0.382979	4.925	1	MRI(+)/cytology(-)<MRI(-)/cytology(-)
4064	379.165	8.02	0.9	0.382979	2.77	1	MRI(+)/cytology(-)<MRI(-)/cytology(-)
4843	477.312	9.33	0.9	0.382979	4.15	1	MRI(+)/cytology(-)<MRI(-)/cytology(-)
4867	479.24	8.17	0.9	0.382979	4.39	1	MRI(+)/cytology(-)<MRI(-)/cytology(-)
5033	498.257	8.84	0.9	0.382979	3.09	1	MRI(+)/cytology(-)<MRI(-)/cytology(-)
5101	503.301	8.81	0.9	0.382979	4.275	1	MRI(+)/cytology(-)<MRI(-)/cytology(-)
5157	507.272	15.66	0.9	0.382979	4.995	1	MRI(+)/cytology(-)<MRI(-)/cytology(-)
5158	508.273	15.66	0.9	0.382979	4.52	1	MRI(+)/cytology(-)<MRI(-)/cytology(-)
5444	549.365	8.34	0.9	0.382979	5.505	1	MRI(+)/cytology(-)<MRI(-)/cytology(-)
5462	550.369	8.43	0.9	0.382979	4.59	0	MRI(+)/cytology(-)<MRI(-)/cytology(-)
5759	609.385	8.76	0.9	0.382979	3.725	1	MRI(+)/cytology(-)<MRI(-)/cytology(-)
5832	624.378	8.77	0.9	0.382979	3.035	1	MRI(+)/cytology(-)<MRI(-)/cytology(-)
5917	635.385	8.57	0.9	0.382979	5.16	1	MRI(+)/cytology(-)<MRI(-)/cytology(-)
5939	637.417	9.03	0.9	0.382979	2.56	1	MRI(+)/cytology(-)<MRI(-)/cytology(-)
5941	637.419	8.78	0.9	0.382979	2.87	1	MRI(+)/cytology(-)<MRI(-)/cytology(-)
5975	653.411	8.82	0.9	0.382979	3.185	1	MRI(+)/cytology(-)<MRI(-)/cytology(-)
582	102.127	1.83	0.75	0.531915	5.11	1	MRI(+)/cytology(-)<MRI(-)/cytology(-)
[truncated: 4,590 more rows]

## Sheet: Supplementary Table 2C
row no.	mass value (m/z)	retention time (min)	sensitivity	specificity	threshold	zero flag	overall pattern
5931	636.421	8.92	1	0.723404	3.23	1	MRI(-)/cytology(+)<MRI(-)/cytology(-)
858	112.051	2.36	0.75	0.914894	3	1	MRI(-)/cytology(+)<MRI(-)/cytology(-)
4358	415.143	7.89	0.875	0.787234	2.215	1	MRI(-)/cytology(+)>MRI(-)/cytology(-)
4515	431.315	14.09	0.875	0.787234	4.585	1	MRI(-)/cytology(+)>MRI(-)/cytology(-)
4514	431.315	14.21	0.875	0.765957	4.54	1	MRI(-)/cytology(+)>MRI(-)/cytology(-)
5024	497.341	14.03	0.875	0.765957	3.62	1	MRI(-)/cytology(+)>MRI(-)/cytology(-)
5409	547.188	10.85	0.75	0.87234	1.635	0	MRI(-)/cytology(+)>MRI(-)/cytology(-)
5025	497.343	14	0.875	0.744681	3.7	1	MRI(-)/cytology(+)>MRI(-)/cytology(-)
6101	702.393	8.99	0.875	0.744681	2.415	1	MRI(-)/cytology(+)<MRI(-)/cytology(-)
3922	363.201	8.56	1	0.617021	3.08	1	MRI(-)/cytology(+)>MRI(-)/cytology(-)
6339	853.726	17.18	1	0.617021	3.305	0	MRI(-)/cytology(+)>MRI(-)/cytology(-)
1275	130.158	9.52	0.75	0.851064	3.1	1	MRI(-)/cytology(+)<MRI(-)/cytology(-)
5003	496.338	14.03	0.875	0.723404	4.065	1	MRI(-)/cytology(+)>MRI(-)/cytology(-)
3368	306.159	8.83	1	0.595745	3.26	1	MRI(-)/cytology(+)<MRI(-)/cytology(-)
5607	570.32	9.4	1	0.595745	3.57	1	MRI(-)/cytology(+)<MRI(-)/cytology(-)
6244	778.861	8.24	1	0.595745	3.085	1	MRI(-)/cytology(+)>MRI(-)/cytology(-)
782	105.034	7.91	0.75	0.829787	2.815	1	MRI(-)/cytology(+)<MRI(-)/cytology(-)
1128	124.087	19.59	0.875	0.702128	5.32	1	MRI(-)/cytology(+)<MRI(-)/cytology(-)
1301	133.08	2.01	0.875	0.702128	4.37	1	MRI(-)/cytology(+)>MRI(-)/cytology(-)
1659	166.097	18.25	0.875	0.702128	4.93	1	MRI(-)/cytology(+)>MRI(-)/cytology(-)
2799	261.13	14.84	0.875	0.702128	5.14	1	MRI(-)/cytology(+)>MRI(-)/cytology(-)
4842	477.312	7.96	0.875	0.702128	2.06	0	MRI(-)/cytology(+)>MRI(-)/cytology(-)
6017	659.37	8.87	0.875	0.702128	2.11	1	MRI(-)/cytology(+)<MRI(-)/cytology(-)
6098	702.391	8.91	0.875	0.702128	2.52	1	MRI(-)/cytology(+)<MRI(-)/cytology(-)
6336	853.726	22.34	0.875	0.702128	4.39	1	MRI(-)/cytology(+)>MRI(-)/cytology(-)
825	110.07	20.01	1	0.574468	3.89	1	MRI(-)/cytology(+)>MRI(-)/cytology(-)
5670	586.303	8.96	1	0.574468	2.345	1	MRI(-)/cytology(+)<MRI(-)/cytology(-)
5807	614.347	9.45	1	0.574468	2.94	1	MRI(-)/cytology(+)<MRI(-)/cytology(-)
853	110.974	3.86	0.75	0.808511	5	1	MRI(-)/cytology(+)>MRI(-)/cytology(-)
1399	138.091	18.78	0.75	0.808511	4.39	1	MRI(-)/cytology(+)>MRI(-)/cytology(-)
1627	165.114	22.73	0.75	0.808511	4.73	1	MRI(-)/cytology(+)>MRI(-)/cytology(-)
3317	305.157	8.73	0.75	0.808511	4	1	MRI(-)/cytology(+)<MRI(-)/cytology(-)
5578	568.337	13.3	0.75	0.808511	3.66	1	MRI(-)/cytology(+)>MRI(-)/cytology(-)
6020	659.374	8.9	0.75	0.808511	2.15	0	MRI(-)/cytology(+)<MRI(-)/cytology(-)
290	82.0528	16.05	0.875	0.680851	3.31	1	MRI(-)/cytology(+)<MRI(-)/cytology(-)
386	85.0406	18.21	0.875	0.680851	2.71	1	MRI(-)/cytology(+)<MRI(-)/cytology(-)
840	110.071	18.85	0.875	0.680851	3.92	1	MRI(-)/cytology(+)>MRI(-)/cytology(-)
1527	154.124	7.97	0.875	0.680851	2.85	1	MRI(-)/cytology(+)<MRI(-)/cytology(-)
1709	171.112	8	0.875	0.680851	3.75	1	MRI(-)/cytology(+)<MRI(-)/cytology(-)
2663	247.169	8.66	0.875	0.680851	2.83	0	MRI(-)/cytology(+)<MRI(-)/cytology(-)
4898	481.261	8.91	0.875	0.680851	4.21	1	MRI(-)/cytology(+)<MRI(-)/cytology(-)
5936	637.411	9.27	0.875	0.680851	1.76	0	MRI(-)/cytology(+)<MRI(-)/cytology(-)
1607	162.111	1.72	1	0.553191	4.495	1	MRI(-)/cytology(+)>MRI(-)/cytology(-)
1660	166.097	20.05	1	0.553191	4.53	1	MRI(-)/cytology(+)>MRI(-)/cytology(-)
3372	306.16	7.96	1	0.553191	2.87	1	MRI(-)/cytology(+)>MRI(-)/cytology(-)
3408	311.184	12.44	1	0.553191	4.73	1	MRI(-)/cytology(+)<MRI(-)/cytology(-)
3923	363.202	7.91	1	0.553191	2.86	1	MRI(-)/cytology(+)>MRI(-)/cytology(-)
5321	529.09	9.65	1	0.553191	1.875	0	MRI(-)/cytology(+)>MRI(-)/cytology(-)
1260	127.095	8.44	0.625	0.914894	3.385	1	MRI(-)/cytology(+)<MRI(-)/cytology(-)
2319	220.07	8.82	0.625	0.914894	2.25	1	MRI(-)/cytology(+)<MRI(-)/cytology(-)
1457	144.08	7.97	0.75	0.787234	3.84	1	MRI(-)/cytology(+)>MRI(-)/cytology(-)
1621	165.112	22.32	0.75	0.787234	4.94	1	MRI(-)/cytology(+)>MRI(-)/cytology(-)
2057	205.029	3.85	0.75	0.787234	4.79	1	MRI(-)/cytology(+)>MRI(-)/cytology(-)
2299	219.017	3.84	0.75	0.787234	4.99	1	MRI(-)/cytology(+)>MRI(-)/cytology(-)
2507	235.18	7.73	0.75	0.787234	3.815	1	MRI(-)/cytology(+)<MRI(-)/cytology(-)
5353	536.324	9.13	0.75	0.787234	3.14	1	MRI(-)/cytology(+)>MRI(-)/cytology(-)
80	59.0516	8.96	0.875	0.659574	5.205	1	MRI(-)/cytology(+)>MRI(-)/cytology(-)
1014	123.079	19.51	0.875	0.659574	4.97	1	MRI(-)/cytology(+)<MRI(-)/cytology(-)
1171	124.087	17.95	0.875	0.659574	5.225	1	MRI(-)/cytology(+)<MRI(-)/cytology(-)
1514	153.065	7.83	0.875	0.659574	3.6	1	MRI(-)/cytology(+)<MRI(-)/cytology(-)
1892	189.074	8.38	0.875	0.659574	3.285	1	MRI(-)/cytology(+)<MRI(-)/cytology(-)
3320	305.157	8.58	0.875	0.659574	4.04	1	MRI(-)/cytology(+)<MRI(-)/cytology(-)
3658	341.267	16.04	0.875	0.659574	4.38	1	MRI(-)/cytology(+)>MRI(-)/cytology(-)
4982	492.302	8.13	0.875	0.659574	2.66	1	MRI(-)/cytology(+)>MRI(-)/cytology(-)
5304	527.297	8.98	0.875	0.659574	3.26	1	MRI(-)/cytology(+)<MRI(-)/cytology(-)
5801	614.342	8.91	0.875	0.659574	3.09	1	MRI(-)/cytology(+)<MRI(-)/cytology(-)
6242	777.862	8.24	0.875	0.659574	3.25	0	MRI(-)/cytology(+)>MRI(-)/cytology(-)
2822	261.131	15.64	1	0.531915	5.19	1	MRI(-)/cytology(+)>MRI(-)/cytology(-)
3478	321.152	9.62	1	0.531915	4.08	1	MRI(-)/cytology(+)<MRI(-)/cytology(-)
3725	349.182	7.94	1	0.531915	3.18	1	MRI(-)/cytology(+)>MRI(-)/cytology(-)
4037	373.26	8.64	1	0.531915	2.885	1	MRI(-)/cytology(+)<MRI(-)/cytology(-)
4051	376.26	12.87	1	0.531915	3.22	1	MRI(-)/cytology(+)<MRI(-)/cytology(-)
5320	529.09	9.7	1	0.531915	1.83	0	MRI(-)/cytology(+)>MRI(-)/cytology(-)
6046	680.448	9.1	1	0.531915	2.79	1	MRI(-)/cytology(+)<MRI(-)/cytology(-)
6264	795.889	7.94	1	0.531915	2.35	0	MRI(-)/cytology(+)>MRI(-)/cytology(-)
6290	822.919	7.97	1	0.531915	2.39	0	MRI(-)/cytology(+)>MRI(-)/cytology(-)
1628	165.114	19.66	0.625	0.893617	4.89	1	MRI(-)/cytology(+)>MRI(-)/cytology(-)
2044	203.049	2.28	0.625	0.893617	4.39	1	MRI(-)/cytology(+)<MRI(-)/cytology(-)
4709	454.235	8.7	0.625	0.893617	2.905	1	MRI(-)/cytology(+)<MRI(-)/cytology(-)
6276	804.816	7.97	0.625	0.893617	2.84	0	MRI(-)/cytology(+)>MRI(-)/cytology(-)
244	72.0826	2.31	0.75	0.765957	4.44	1	MRI(-)/cytology(+)>MRI(-)/cytology(-)
285	82.0524	18.83	0.75	0.765957	2.795	0	MRI(-)/cytology(+)<MRI(-)/cytology(-)
315	82.0538	18.78	0.75	0.765957	3.14	1	MRI(-)/cytology(+)<MRI(-)/cytology(-)
471	91.0549	20.07	0.75	0.765957	4.86	1	MRI(-)/cytology(+)<MRI(-)/cytology(-)
791	106.078	20.07	0.75	0.765957	4.655	1	MRI(-)/cytology(+)<MRI(-)/cytology(-)
1147	124.087	21.02	0.75	0.765957	5.27	1	MRI(-)/cytology(+)<MRI(-)/cytology(-)
1674	166.099	18.94	0.75	0.765957	5.08	1	MRI(-)/cytology(+)>MRI(-)/cytology(-)
2264	218.107	8.35	0.75	0.765957	3.43	1	MRI(-)/cytology(+)<MRI(-)/cytology(-)
3170	292.15	7.88	0.75	0.765957	3.215	1	MRI(-)/cytology(+)>MRI(-)/cytology(-)
3297	305.156	22.46	0.75	0.765957	4.93	1	MRI(-)/cytology(+)>MRI(-)/cytology(-)
3377	306.161	8.72	0.75	0.765957	3.14	1	MRI(-)/cytology(+)<MRI(-)/cytology(-)
3963	367.149	8.3	0.75	0.765957	3.11	1	MRI(-)/cytology(+)<MRI(-)/cytology(-)
4151	390.264	8.64	0.75	0.765957	2.61	0	MRI(-)/cytology(+)<MRI(-)/cytology(-)
4707	454.233	8.05	0.75	0.765957	2.81	1	MRI(-)/cytology(+)>MRI(-)/cytology(-)
5004	496.34	13.82	0.75	0.765957	4.315	1	MRI(-)/cytology(+)>MRI(-)/cytology(-)
5325	531.015	1.5	0.75	0.765957	4.015	1	MRI(-)/cytology(+)>MRI(-)/cytology(-)
5402	544.337	13.35	0.75	0.765957	4.25	1	MRI(-)/cytology(+)>MRI(-)/cytology(-)
5822	615.351	9.06	0.75	0.765957	2.31	1	MRI(-)/cytology(+)<MRI(-)/cytology(-)
5969	653.407	8.88	0.75	0.765957	2.765	1	MRI(-)/cytology(+)<MRI(-)/cytology(-)
327	82.054	15.79	0.875	0.638298	3.27	1	MRI(-)/cytology(+)<MRI(-)/cytology(-)
382	85.0406	18.11	0.875	0.638298	3.24	1	MRI(-)/cytology(+)<MRI(-)/cytology(-)
868	114.066	1.74	0.875	0.638298	4.8	1	MRI(-)/cytology(+)<MRI(-)/cytology(-)
1054	123.099	19.51	0.875	0.638298	4.48	1	MRI(-)/cytology(+)>MRI(-)/cytology(-)
1111	124.087	19.51	0.875	0.638298	5.745	1	MRI(-)/cytology(+)<MRI(-)/cytology(-)
1123	124.087	21.09	0.875	0.638298	4.77	1	MRI(-)/cytology(+)<MRI(-)/cytology(-)
1191	124.087	17.87	0.875	0.638298	5.36	1	MRI(-)/cytology(+)<MRI(-)/cytology(-)
2908	262.144	14.38	0.875	0.638298	4.99	1	MRI(-)/cytology(+)<MRI(-)/cytology(-)
3119	284.208	8.64	0.875	0.638298	2.99	1	MRI(-)/cytology(+)<MRI(-)/cytology(-)
3755	349.184	9.74	0.875	0.638298	4.22	1	MRI(-)/cytology(+)<MRI(-)/cytology(-)
4154	391.189	7.91	0.875	0.638298	2.84	1	MRI(-)/cytology(+)>MRI(-)/cytology(-)
4173	393.207	8.83	0.875	0.638298	4.41	1	MRI(-)/cytology(+)<MRI(-)/cytology(-)
4384	416.283	8.1	0.875	0.638298	3.035	1	MRI(-)/cytology(+)>MRI(-)/cytology(-)
5679	591.351	8.96	0.875	0.638298	3.35	1	MRI(-)/cytology(+)<MRI(-)/cytology(-)
5972	653.41	8.86	0.875	0.638298	2.79	1	MRI(-)/cytology(+)<MRI(-)/cytology(-)
6241	777.86	7.94	0.875	0.638298	2.16	0	MRI(-)/cytology(+)>MRI(-)/cytology(-)
6327	853.722	19.46	0.875	0.638298	3.72	1	MRI(-)/cytology(+)>MRI(-)/cytology(-)
6368	854.727	22.34	0.875	0.638298	4.255	1	MRI(-)/cytology(+)>MRI(-)/cytology(-)
1611	163.116	1.68	1	0.510638	3.77	1	MRI(-)/cytology(+)>MRI(-)/cytology(-)
2459	230.248	10.25	1	0.510638	4.75	1	MRI(-)/cytology(+)<MRI(-)/cytology(-)
2615	241.031	1.93	1	0.510638	3.39	1	MRI(-)/cytology(+)>MRI(-)/cytology(-)
3188	295.226	11.71	1	0.510638	4.18	1	MRI(-)/cytology(+)<MRI(-)/cytology(-)
3344	305.158	8.91	1	0.510638	4.075	1	MRI(-)/cytology(+)<MRI(-)/cytology(-)
3381	306.161	8.95	1	0.510638	3.3	1	MRI(-)/cytology(+)<MRI(-)/cytology(-)
3386	307.113	9.13	1	0.510638	3.21	1	MRI(-)/cytology(+)>MRI(-)/cytology(-)
5905	634.882	22.73	1	0.510638	3.895	1	MRI(-)/cytology(+)>MRI(-)/cytology(-)
5973	653.411	8.94	1	0.510638	2.745	0	MRI(-)/cytology(+)<MRI(-)/cytology(-)
6188	744.841	1.59	1	0.510638	5.17	1	MRI(-)/cytology(+)>MRI(-)/cytology(-)
6328	853.722	20.52	1	0.510638	3.455	0	MRI(-)/cytology(+)>MRI(-)/cytology(-)
6449	943.938	8.01	1	0.510638	2.375	0	MRI(-)/cytology(+)>MRI(-)/cytology(-)
1490	147.076	1.92	0.625	0.87234	5.505	1	MRI(-)/cytology(+)>MRI(-)/cytology(-)
1526	154.086	8.42	0.625	0.87234	2.72	1	MRI(-)/cytology(+)<MRI(-)/cytology(-)
2654	247.166	22.27	0.625	0.87234	4.89	1	MRI(-)/cytology(+)>MRI(-)/cytology(-)
2968	274.275	22.4	0.625	0.87234	4.905	1	MRI(-)/cytology(+)>MRI(-)/cytology(-)
3566	329.237	7.84	0.625	0.87234	2.695	1	MRI(-)/cytology(+)<MRI(-)/cytology(-)
5708	593.388	9.41	0.625	0.87234	2.335	1	MRI(-)/cytology(+)<MRI(-)/cytology(-)
326	82.054	21.09	0.75	0.744681	3.635	1	MRI(-)/cytology(+)<MRI(-)/cytology(-)
794	106.078	20.3	0.75	0.744681	4.64	1	MRI(-)/cytology(+)<MRI(-)/cytology(-)
1118	124.087	20.23	0.75	0.744681	5.41	1	MRI(-)/cytology(+)<MRI(-)/cytology(-)
1194	124.087	18.97	0.75	0.744681	5.14	1	MRI(-)/cytology(+)<MRI(-)/cytology(-)
1295	132.077	2.05	0.75	0.744681	5.34	1	MRI(-)/cytology(+)>MRI(-)/cytology(-)
1885	188.071	8.83	0.75	0.744681	2.385	1	MRI(-)/cytology(+)<MRI(-)/cytology(-)
2204	217.105	16.59	0.75	0.744681	5.69	1	MRI(-)/cytology(+)>MRI(-)/cytology(-)
2283	218.21	8.23	0.75	0.744681	2.355	0	MRI(-)/cytology(+)>MRI(-)/cytology(-)
3056	283.174	16.95	0.75	0.744681	5.21	1	MRI(-)/cytology(+)>MRI(-)/cytology(-)
3427	315.159	8.72	0.75	0.744681	3.11	1	MRI(-)/cytology(+)<MRI(-)/cytology(-)
3540	328.233	8.58	0.75	0.744681	3.61	1	MRI(-)/cytology(+)<MRI(-)/cytology(-)
3743	349.183	9.01	0.75	0.744681	4.11	1	MRI(-)/cytology(+)<MRI(-)/cytology(-)
4578	435.216	8.82	0.75	0.744681	2.93	1	MRI(-)/cytology(+)<MRI(-)/cytology(-)
5407	545.344	13.35	0.75	0.744681	3.755	1	MRI(-)/cytology(+)>MRI(-)/cytology(-)
5455	550.36	8.95	0.75	0.744681	1.89	0	MRI(-)/cytology(+)<MRI(-)/cytology(-)
6225	770.852	20.67	0.75	0.744681	1.335	0	MRI(-)/cytology(+)<MRI(-)/cytology(-)
6267	796.841	7.98	0.75	0.744681	3	0	MRI(-)/cytology(+)>MRI(-)/cytology(-)
6355	853.731	22.48	0.75	0.744681	4.42	1	MRI(-)/cytology(+)>MRI(-)/cytology(-)
187	61.0308	2.24	0.875	0.617021	4.81	1	MRI(-)/cytology(+)>MRI(-)/cytology(-)
295	82.053	16.22	0.875	0.617021	3.3	1	MRI(-)/cytology(+)<MRI(-)/cytology(-)
297	82.0534	16.88	0.875	0.617021	2.595	1	MRI(-)/cytology(+)<MRI(-)/cytology(-)
806	107.085	1.81	0.875	0.617021	5.16	1	MRI(-)/cytology(+)>MRI(-)/cytology(-)
1207	124.088	8.6	0.875	0.617021	3.67	1	MRI(-)/cytology(+)<MRI(-)/cytology(-)
1379	137.045	7.87	0.875	0.617021	3.35	1	MRI(-)/cytology(+)<MRI(-)/cytology(-)
1411	138.091	21	0.875	0.617021	4.12	1	MRI(-)/cytology(+)>MRI(-)/cytology(-)
1597	160.086	9.63	0.875	0.617021	2.495	1	MRI(-)/cytology(+)>MRI(-)/cytology(-)
2197	217.104	16.52	0.875	0.617021	5.33	1	MRI(-)/cytology(+)>MRI(-)/cytology(-)
2534	239.125	9.34	0.875	0.617021	3.87	1	MRI(-)/cytology(+)<MRI(-)/cytology(-)
2578	239.149	18.75	0.875	0.617021	5.43	1	MRI(-)/cytology(+)>MRI(-)/cytology(-)
3032	278.184	14.38	0.875	0.617021	4.7	1	MRI(-)/cytology(+)<MRI(-)/cytology(-)
3345	305.158	9.13	0.875	0.617021	4.11	1	MRI(-)/cytology(+)<MRI(-)/cytology(-)
3403	309.178	2.31	0.875	0.617021	3.8	1	MRI(-)/cytology(+)>MRI(-)/cytology(-)
4880	481.257	8.77	0.875	0.617021	4.69	1	MRI(-)/cytology(+)<MRI(-)/cytology(-)
5006	496.341	14.1	0.875	0.617021	3.865	1	MRI(-)/cytology(+)>MRI(-)/cytology(-)
6043	680.441	8.96	0.875	0.617021	2.795	1	MRI(-)/cytology(+)<MRI(-)/cytology(-)
6092	701.391	8.97	0.875	0.617021	3.13	1	MRI(-)/cytology(+)<MRI(-)/cytology(-)
6372	854.73	18.79	0.875	0.617021	3.465	1	MRI(-)/cytology(+)>MRI(-)/cytology(-)
6374	854.731	18.67	0.875	0.617021	3.605	1	MRI(-)/cytology(+)>MRI(-)/cytology(-)
55	59.0515	15.6	1	0.489362	4.76	1	MRI(-)/cytology(+)>MRI(-)/cytology(-)
1079	124.086	8.11	1	0.489362	3.6	1	MRI(-)/cytology(+)<MRI(-)/cytology(-)
1484	146.059	7.97	1	0.489362	3.005	1	MRI(-)/cytology(+)>MRI(-)/cytology(-)
1523	154.086	7.89	1	0.489362	3.04	1	MRI(-)/cytology(+)<MRI(-)/cytology(-)
1655	166.096	20.18	1	0.489362	4.665	1	MRI(-)/cytology(+)>MRI(-)/cytology(-)
1815	178.122	22.78	1	0.489362	4.335	1	MRI(-)/cytology(+)>MRI(-)/cytology(-)
1938	193.095	7.99	1	0.489362	3.7	1	MRI(-)/cytology(+)<MRI(-)/cytology(-)
2028	201.109	8.96	1	0.489362	3.36	1	MRI(-)/cytology(+)>MRI(-)/cytology(-)
2302	219.081	1.6	1	0.489362	4.605	1	MRI(-)/cytology(+)>MRI(-)/cytology(-)
2502	235.168	14.11	1	0.489362	4.96	1	MRI(-)/cytology(+)<MRI(-)/cytology(-)
2556	239.148	20.27	1	0.489362	4.82	1	MRI(-)/cytology(+)>MRI(-)/cytology(-)
2878	262.132	8.64	1	0.489362	3.26	1	MRI(-)/cytology(+)<MRI(-)/cytology(-)
3373	306.16	7.85	1	0.489362	2.405	1	MRI(-)/cytology(+)>MRI(-)/cytology(-)
3979	371.103	1.46	1	0.489362	4.48	1	MRI(-)/cytology(+)<MRI(-)/cytology(-)
4040	373.261	8.01	1	0.489362	2.37	1	MRI(-)/cytology(+)>MRI(-)/cytology(-)
4068	382.143	8.06	1	0.489362	2.845	1	MRI(-)/cytology(+)>MRI(-)/cytology(-)
4292	408.308	17.23	1	0.489362	4.11	1	MRI(-)/cytology(+)>MRI(-)/cytology(-)
4320	410.206	7.94	1	0.489362	2.505	1	MRI(-)/cytology(+)>MRI(-)/cytology(-)
4456	430.164	7.76	1	0.489362	2.575	1	MRI(-)/cytology(+)>MRI(-)/cytology(-)
4795	467.099	1.57	1	0.489362	4.855	1	MRI(-)/cytology(+)<MRI(-)/cytology(-)
6000	657.368	10	1	0.489362	3.12	1	MRI(-)/cytology(+)<MRI(-)/cytology(-)
6169	719.848	1.54	1	0.489362	4.535	1	MRI(-)/cytology(+)>MRI(-)/cytology(-)
6263	795.796	19.28	1	0.489362	3.195	0	MRI(-)/cytology(+)>MRI(-)/cytology(-)
6269	797.345	8.22	1	0.489362	3.07	0	MRI(-)/cytology(+)>MRI(-)/cytology(-)
6274	804.312	7.97	1	0.489362	2.18	0	MRI(-)/cytology(+)>MRI(-)/cytology(-)
6330	853.723	17.35	1	0.489362	3.42	1	MRI(-)/cytology(+)>MRI(-)/cytology(-)
6447	942.938	8.01	1	0.489362	2.5	0	MRI(-)/cytology(+)>MRI(-)/cytology(-)
835	110.071	18.72	0.625	0.851064	4.12	1	MRI(-)/cytology(+)>MRI(-)/cytology(-)
1828	181.073	7.75	0.625	0.851064	3.19	1	MRI(-)/cytology(+)<MRI(-)/cytology(-)
2007	200.039	1.63	0.625	0.851064	4.18	1	MRI(-)/cytology(+)>MRI(-)/cytology(-)
3312	305.157	17.14	0.625	0.851064	5.235	1	MRI(-)/cytology(+)>MRI(-)/cytology(-)
4216	394.131	8.45	0.625	0.851064	0.785	0	MRI(-)/cytology(+)<MRI(-)/cytology(-)
6166	710.848	1.59	0.625	0.851064	4.74	1	MRI(-)/cytology(+)>MRI(-)/cytology(-)
6232	770.858	19.62	0.625	0.851064	0.92	0	MRI(-)/cytology(+)<MRI(-)/cytology(-)
27	56.0526	20.28	0.75	0.723404	4.13	1	MRI(-)/cytology(+)<MRI(-)/cytology(-)
395	85.0409	19.06	0.75	0.723404	3.345	1	MRI(-)/cytology(+)<MRI(-)/cytology(-)
470	91.0549	17.6	0.75	0.723404	3.5	1	MRI(-)/cytology(+)<MRI(-)/cytology(-)
478	91.055	18.96	0.75	0.723404	4.56	1	MRI(-)/cytology(+)<MRI(-)/cytology(-)
484	91.0551	21.07	0.75	0.723404	4.74	1	MRI(-)/cytology(+)<MRI(-)/cytology(-)
527	100.076	8.09	0.75	0.723404	3.405	1	MRI(-)/cytology(+)<MRI(-)/cytology(-)
528	100.077	8.29	0.75	0.723404	3.15	1	MRI(-)/cytology(+)<MRI(-)/cytology(-)
929	121.085	7.66	0.75	0.723404	4.21	1	MRI(-)/cytology(+)>MRI(-)/cytology(-)
1156	124.087	15.44	0.75	0.723404	4.72	1	MRI(-)/cytology(+)>MRI(-)/cytology(-)
1181	124.087	21.23	0.75	0.723404	5.36	1	MRI(-)/cytology(+)<MRI(-)/cytology(-)
1663	166.097	19.56	0.75	0.723404	4.975	1	MRI(-)/cytology(+)>MRI(-)/cytology(-)
1823	181.071	7.66	0.75	0.723404	3.31	1	MRI(-)/cytology(+)<MRI(-)/cytology(-)
1942	194.078	8.62	0.75	0.723404	2.58	1	MRI(-)/cytology(+)<MRI(-)/cytology(-)
1947	194.095	7.89	0.75	0.723404	3.535	1	MRI(-)/cytology(+)<MRI(-)/cytology(-)
2300	219.048	2.71	0.75	0.723404	3.9	1	MRI(-)/cytology(+)>MRI(-)/cytology(-)
2607	240.179	7.55	0.75	0.723404	3.25	1	MRI(-)/cytology(+)<MRI(-)/cytology(-)
2981	275.64	8	0.75	0.723404	0.985	0	MRI(-)/cytology(+)>MRI(-)/cytology(-)
3157	291.146	7.88	0.75	0.723404	3.105	1	MRI(-)/cytology(+)>MRI(-)/cytology(-)
4094	384.122	2.09	0.75	0.723404	4.73	1	MRI(-)/cytology(+)<MRI(-)/cytology(-)
4396	417.226	10.27	0.75	0.723404	3.11	1	MRI(-)/cytology(+)<MRI(-)/cytology(-)
5016	497.253	8.87	0.75	0.723404	3.67	1	MRI(-)/cytology(+)<MRI(-)/cytology(-)
5612	571.315	9.02	0.75	0.723404	2.98	1	MRI(-)/cytology(+)<MRI(-)/cytology(-)
5993	657.364	9.19	0.75	0.723404	3.23	1	MRI(-)/cytology(+)<MRI(-)/cytology(-)
6268	797.335	7.98	0.75	0.723404	2.855	0	MRI(-)/cytology(+)>MRI(-)/cytology(-)
6270	799.842	7.94	0.75	0.723404	2.725	1	MRI(-)/cytology(+)>MRI(-)/cytology(-)
5	53.0061	1.81	0.875	0.595745	4.66	1	MRI(-)/cytology(+)>MRI(-)/cytology(-)
54	59.0515	14.86	0.875	0.595745	5.295	1	MRI(-)/cytology(+)>MRI(-)/cytology(-)
403	85.0411	18.13	0.875	0.595745	2.55	1	MRI(-)/cytology(+)<MRI(-)/cytology(-)
1100	124.087	9.41	0.875	0.595745	3.66	1	MRI(-)/cytology(+)<MRI(-)/cytology(-)
1401	138.091	20.14	0.875	0.595745	3.99	1	MRI(-)/cytology(+)>MRI(-)/cytology(-)
1494	148.059	8.43	0.875	0.595745	2.98	1	MRI(-)/cytology(+)<MRI(-)/cytology(-)
1531	155.089	7.91	0.875	0.595745	2.92	1	MRI(-)/cytology(+)<MRI(-)/cytology(-)
1971	195.122	18.74	0.875	0.595745	5.23	1	MRI(-)/cytology(+)>MRI(-)/cytology(-)
2440	230.095	2.33	0.875	0.595745	3.56	1	MRI(-)/cytology(+)>MRI(-)/cytology(-)
2591	239.15	16.89	0.875	0.595745	5	1	MRI(-)/cytology(+)>MRI(-)/cytology(-)
3401	309.117	8.81	0.875	0.595745	3.35	1	MRI(-)/cytology(+)>MRI(-)/cytology(-)
3473	321.15	8.64	0.875	0.595745	4.01	1	MRI(-)/cytology(+)<MRI(-)/cytology(-)
4004	372.197	7.67	0.875	0.595745	2.695	1	MRI(-)/cytology(+)>MRI(-)/cytology(-)
4223	394.212	8.83	0.875	0.595745	3.55	1	MRI(-)/cytology(+)<MRI(-)/cytology(-)
4706	454.233	8.8	0.875	0.595745	3.075	1	MRI(-)/cytology(+)<MRI(-)/cytology(-)
5743	606.791	22.98	0.875	0.595745	4.54	1	MRI(-)/cytology(+)<MRI(-)/cytology(-)
6035	679.406	8.91	0.875	0.595745	2.71	1	MRI(-)/cytology(+)<MRI(-)/cytology(-)
6245	778.864	7.94	0.875	0.595745	2.68	1	MRI(-)/cytology(+)>MRI(-)/cytology(-)
6275	804.814	8.21	0.875	0.595745	3.005	1	MRI(-)/cytology(+)>MRI(-)/cytology(-)
6361	854.726	18.13	0.875	0.595745	3.41	1	MRI(-)/cytology(+)>MRI(-)/cytology(-)
6363	854.726	20.13	0.875	0.595745	3.49	1	MRI(-)/cytology(+)>MRI(-)/cytology(-)
6367	854.727	17.9	0.875	0.595745	3.35	1	MRI(-)/cytology(+)>MRI(-)/cytology(-)
106	59.0518	23.21	1	0.468085	4.97	1	MRI(-)/cytology(+)>MRI(-)/cytology(-)
576	102.127	8.15	1	0.468085	4.77	1	MRI(-)/cytology(+)<MRI(-)/cytology(-)
897	118.121	8.11	1	0.468085	2.655	1	MRI(-)/cytology(+)<MRI(-)/cytology(-)
1068	123.1	18.82	1	0.468085	4.405	1	MRI(-)/cytology(+)>MRI(-)/cytology(-)
1469	144.174	7.86	1	0.468085	2.38	1	MRI(-)/cytology(+)>MRI(-)/cytology(-)
1891	189.073	7.81	1	0.468085	3.76	1	MRI(-)/cytology(+)>MRI(-)/cytology(-)
1968	195.121	16.8	1	0.468085	4.74	1	MRI(-)/cytology(+)>MRI(-)/cytology(-)
1977	195.122	18.8	1	0.468085	4.8	1	MRI(-)/cytology(+)>MRI(-)/cytology(-)
2938	271.13	8.99	1	0.468085	3.04	1	MRI(-)/cytology(+)>MRI(-)/cytology(-)
3009	277.126	8.58	1	0.468085	3.86	1	MRI(-)/cytology(+)<MRI(-)/cytology(-)
3677	344.229	7.94	1	0.468085	2.915	1	MRI(-)/cytology(+)>MRI(-)/cytology(-)
3706	347.169	7.97	1	0.468085	3.175	1	MRI(-)/cytology(+)>MRI(-)/cytology(-)
3956	366.181	7.97	1	0.468085	3.07	1	MRI(-)/cytology(+)>MRI(-)/cytology(-)
4036	373.26	8.79	1	0.468085	2.995	1	MRI(-)/cytology(+)<MRI(-)/cytology(-)
4813	476.305	8.16	1	0.468085	2.43	1	MRI(-)/cytology(+)>MRI(-)/cytology(-)
5084	498.902	22.72	1	0.468085	4.06	1	MRI(-)/cytology(+)>MRI(-)/cytology(-)
5242	523.339	8.38	1	0.468085	2.545	0	MRI(-)/cytology(+)>MRI(-)/cytology(-)
5515	566.365	9.08	1	0.468085	2.45	1	MRI(-)/cytology(+)>MRI(-)/cytology(-)
5793	613.345	9.06	1	0.468085	4.135	1	MRI(-)/cytology(+)<MRI(-)/cytology(-)
5811	615.339	9.43	1	0.468085	2.11	0	MRI(-)/cytology(+)<MRI(-)/cytology(-)
5974	653.411	8.93	1	0.468085	2.89	0	MRI(-)/cytology(+)<MRI(-)/cytology(-)
6240	777.858	8.01	1	0.468085	2.045	0	MRI(-)/cytology(+)>MRI(-)/cytology(-)
6251	794.885	8.24	1	0.468085	2.935	1	MRI(-)/cytology(+)>MRI(-)/cytology(-)
6252	794.887	7.94	1	0.468085	2.24	0	MRI(-)/cytology(+)>MRI(-)/cytology(-)
6272	800.844	7.97	1	0.468085	2.155	1	MRI(-)/cytology(+)>MRI(-)/cytology(-)
6359	854.724	20.52	1	0.468085	3.23	0	MRI(-)/cytology(+)>MRI(-)/cytology(-)
6248	779.868	7.98	0.5	0.957447	3.03	1	MRI(-)/cytology(+)>MRI(-)/cytology(-)
6395	876.779	7.97	0.5	0.957447	3.16	1	MRI(-)/cytology(+)>MRI(-)/cytology(-)
1099	124.087	17.93	0.625	0.829787	5.09	1	MRI(-)/cytology(+)<MRI(-)/cytology(-)
1112	124.087	8.92	0.625	0.829787	3.51	1	MRI(-)/cytology(+)<MRI(-)/cytology(-)
1202	124.087	19.75	0.625	0.829787	5.58	1	MRI(-)/cytology(+)<MRI(-)/cytology(-)
1550	158.963	22.53	0.625	0.829787	5.2	1	MRI(-)/cytology(+)>MRI(-)/cytology(-)
2370	226.95	22.63	0.625	0.829787	5.42	1	MRI(-)/cytology(+)>MRI(-)/cytology(-)
2396	226.952	22.54	0.625	0.829787	5.39	1	MRI(-)/cytology(+)>MRI(-)/cytology(-)
2627	244.092	2.36	0.625	0.829787	3.67	1	MRI(-)/cytology(+)<MRI(-)/cytology(-)
5991	657.361	8.88	0.625	0.829787	3.4	1	MRI(-)/cytology(+)<MRI(-)/cytology(-)
301	82.0536	16.65	0.75	0.702128	2.655	1	MRI(-)/cytology(+)<MRI(-)/cytology(-)
307	82.0536	20.16	0.75	0.702128	4.195	1	MRI(-)/cytology(+)<MRI(-)/cytology(-)
318	82.0539	18.94	0.75	0.702128	3.835	1	MRI(-)/cytology(+)<MRI(-)/cytology(-)
755	103.053	7.84	0.75	0.702128	2.98	1	MRI(-)/cytology(+)<MRI(-)/cytology(-)
808	107.086	1.74	0.75	0.702128	4.91	1	MRI(-)/cytology(+)>MRI(-)/cytology(-)
849	110.072	19.51	0.75	0.702128	3.955	1	MRI(-)/cytology(+)>MRI(-)/cytology(-)
887	116.071	2.19	0.75	0.702128	3.64	1	MRI(-)/cytology(+)>MRI(-)/cytology(-)
1105	124.087	18.27	0.75	0.702128	5.14	1	MRI(-)/cytology(+)<MRI(-)/cytology(-)
1254	127.093	8.45	0.75	0.702128	3.32	1	MRI(-)/cytology(+)<MRI(-)/cytology(-)
1405	138.091	19.38	0.75	0.702128	4.16	1	MRI(-)/cytology(+)>MRI(-)/cytology(-)
1493	148.058	2.06	0.75	0.702128	3.61	1	MRI(-)/cytology(+)>MRI(-)/cytology(-)
1497	148.078	1.92	0.75	0.702128	4.44	1	MRI(-)/cytology(+)>MRI(-)/cytology(-)
1624	165.113	22.78	0.75	0.702128	4.9	1	MRI(-)/cytology(+)>MRI(-)/cytology(-)
1852	185.117	9.81	0.75	0.702128	3.89	1	MRI(-)/cytology(+)<MRI(-)/cytology(-)
2271	218.107	8.36	0.75	0.702128	3.5	1	MRI(-)/cytology(+)<MRI(-)/cytology(-)
2492	233.101	7.71	0.75	0.702128	5.185	1	MRI(-)/cytology(+)>MRI(-)/cytology(-)
2713	253.097	10.67	0.75	0.702128	3.78	1	MRI(-)/cytology(+)<MRI(-)/cytology(-)
2921	266.075	2.36	0.75	0.702128	3.16	1	MRI(-)/cytology(+)<MRI(-)/cytology(-)
3476	321.151	7.72	0.75	0.702128	2.935	1	MRI(-)/cytology(+)>MRI(-)/cytology(-)
3535	328.232	7.82	0.75	0.702128	2.91	1	MRI(-)/cytology(+)>MRI(-)/cytology(-)
3638	339.345	19.72	0.75	0.702128	5.29	1	MRI(-)/cytology(+)>MRI(-)/cytology(-)
3682	345.209	10.28	0.75	0.702128	3.9	1	MRI(-)/cytology(+)<MRI(-)/cytology(-)
3803	351.198	8	0.75	0.702128	2.89	1	MRI(-)/cytology(+)>MRI(-)/cytology(-)
4117	388.254	9.06	0.75	0.702128	4.18	1	MRI(-)/cytology(+)>MRI(-)/cytology(-)
4256	399.081	2.13	0.75	0.702128	4.63	1	MRI(-)/cytology(+)<MRI(-)/cytology(-)
4540	432.282	7.91	0.75	0.702128	2.69	1	MRI(-)/cytology(+)>MRI(-)/cytology(-)
4675	448.277	7.99	0.75	0.702128	2.985	1	MRI(-)/cytology(+)>MRI(-)/cytology(-)
4978	492.299	8.88	0.75	0.702128	3.47	1	MRI(-)/cytology(+)<MRI(-)/cytology(-)
5170	512.773	23.02	0.75	0.702128	4.32	1	MRI(-)/cytology(+)<MRI(-)/cytology(-)
5713	593.39	9.01	0.75	0.702128	2.97	1	MRI(-)/cytology(+)<MRI(-)/cytology(-)
5734	601.27	8.35	0.75	0.702128	3.36	1	MRI(-)/cytology(+)>MRI(-)/cytology(-)
6287	820.828	1.63	0.75	0.702128	4.42	1	MRI(-)/cytology(+)>MRI(-)/cytology(-)
6325	853.722	17.86	0.75	0.702128	3.59	1	MRI(-)/cytology(+)>MRI(-)/cytology(-)
6557	1152.27	18.85	0.75	0.702128	2.66	0	MRI(-)/cytology(+)>MRI(-)/cytology(-)
116	59.052	1.78	0.875	0.574468	5.34	1	MRI(-)/cytology(+)>MRI(-)/cytology(-)
158	59.0524	10.67	0.875	0.574468	5.25	1	MRI(-)/cytology(+)>MRI(-)/cytology(-)
188	61.0309	2.3	0.875	0.574468	4.58	1	MRI(-)/cytology(+)>MRI(-)/cytology(-)
1066	123.099	21.01	0.875	0.574468	4.205	1	MRI(-)/cytology(+)>MRI(-)/cytology(-)
1228	125.089	20.22	0.875	0.574468	4.59	1	MRI(-)/cytology(+)<MRI(-)/cytology(-)
1458	144.102	2.28	0.875	0.574468	4.105	1	MRI(-)/cytology(+)>MRI(-)/cytology(-)
1697	171.097	20.23	0.875	0.574468	4.08	1	MRI(-)/cytology(+)>MRI(-)/cytology(-)
1881	188.07	7.98	0.875	0.574468	3.32	1	MRI(-)/cytology(+)>MRI(-)/cytology(-)
1963	195.119	9	0.875	0.574468	4.12	1	MRI(-)/cytology(+)<MRI(-)/cytology(-)
1967	195.121	7.83	0.875	0.574468	4.27	1	MRI(-)/cytology(+)>MRI(-)/cytology(-)
2387	226.952	22.78	0.875	0.574468	4.47	1	MRI(-)/cytology(+)>MRI(-)/cytology(-)
2485	233.099	7.81	0.875	0.574468	4.605	1	MRI(-)/cytology(+)>MRI(-)/cytology(-)
2525	238.1	8.27	0.875	0.574468	2.885	1	MRI(-)/cytology(+)<MRI(-)/cytology(-)
2553	239.148	18.76	0.875	0.574468	5.4	1	MRI(-)/cytology(+)>MRI(-)/cytology(-)
2895	262.135	7.73	0.875	0.574468	2.84	1	MRI(-)/cytology(+)>MRI(-)/cytology(-)
3023	277.182	12.48	0.875	0.574468	4.94	1	MRI(-)/cytology(+)<MRI(-)/cytology(-)
3780	350.184	8.02	0.875	0.574468	2.77	1	MRI(-)/cytology(+)>MRI(-)/cytology(-)
3834	355.071	4.64	0.875	0.574468	4.41	1	MRI(-)/cytology(+)<MRI(-)/cytology(-)
4307	409.205	8.79	0.875	0.574468	3.87	1	MRI(-)/cytology(+)<MRI(-)/cytology(-)
4439	426.172	8.02	0.875	0.574468	2.39	1	MRI(-)/cytology(+)>MRI(-)/cytology(-)
4959	485.214	10.82	0.875	0.574468	2.47	1	MRI(-)/cytology(+)<MRI(-)/cytology(-)
5358	536.329	8.92	0.875	0.574468	3.24	1	MRI(-)/cytology(+)<MRI(-)/cytology(-)
5588	569.313	9.4	0.875	0.574468	4.29	1	MRI(-)/cytology(+)<MRI(-)/cytology(-)
5690	591.361	8.87	0.875	0.574468	3.465	1	MRI(-)/cytology(+)<MRI(-)/cytology(-)
5773	610.388	8.93	0.875	0.574468	2.32	0	MRI(-)/cytology(+)<MRI(-)/cytology(-)
5847	629.317	8.88	0.875	0.574468	2.355	0	MRI(-)/cytology(+)<MRI(-)/cytology(-)
6168	718.839	1.66	0.875	0.574468	5.36	1	MRI(-)/cytology(+)>MRI(-)/cytology(-)
6259	795.792	18.59	0.875	0.574468	3.48	1	MRI(-)/cytology(+)>MRI(-)/cytology(-)
6289	822.889	8.1	0.875	0.574468	2.99	1	MRI(-)/cytology(+)>MRI(-)/cytology(-)
6323	853.72	18.13	0.875	0.574468	3.95	1	MRI(-)/cytology(+)>MRI(-)/cytology(-)
6347	853.729	20.13	0.875	0.574468	3.62	1	MRI(-)/cytology(+)>MRI(-)/cytology(-)
6349	853.729	18.81	0.875	0.574468	3.86	1	MRI(-)/cytology(+)>MRI(-)/cytology(-)
6376	854.732	21.01	0.875	0.574468	3.39	1	MRI(-)/cytology(+)>MRI(-)/cytology(-)
6528	1084.78	1.63	0.875	0.574468	4.53	1	MRI(-)/cytology(+)>MRI(-)/cytology(-)
658	102.129	8.27	1	0.446809	4.85	1	MRI(-)/cytology(+)<MRI(-)/cytology(-)
1508	152.069	8.54	1	0.446809	2.82	1	MRI(-)/cytology(+)<MRI(-)/cytology(-)
1623	165.113	22.83	1	0.446809	3.87	1	MRI(-)/cytology(+)>MRI(-)/cytology(-)
2010	200.2	13.52	1	0.446809	4.72	1	MRI(-)/cytology(+)<MRI(-)/cytology(-)
2168	217.104	8.59	1	0.446809	4.44	1	MRI(-)/cytology(+)<MRI(-)/cytology(-)
2476	231.253	10.25	1	0.446809	3.925	1	MRI(-)/cytology(+)<MRI(-)/cytology(-)
2532	239.124	8.57	1	0.446809	3.145	1	MRI(-)/cytology(+)>MRI(-)/cytology(-)
3789	350.187	7.94	1	0.446809	2.53	1	MRI(-)/cytology(+)>MRI(-)/cytology(-)
3794	351.119	7.98	1	0.446809	2.64	1	MRI(-)/cytology(+)>MRI(-)/cytology(-)
3861	360.224	8.05	1	0.446809	3.12	1	MRI(-)/cytology(+)>MRI(-)/cytology(-)
3955	366.18	8.04	1	0.446809	3.46	1	MRI(-)/cytology(+)>MRI(-)/cytology(-)
4126	388.255	8.14	1	0.446809	2.75	1	MRI(-)/cytology(+)>MRI(-)/cytology(-)
4146	389.26	8.17	1	0.446809	4.5	1	MRI(-)/cytology(+)>MRI(-)/cytology(-)
4535	432.28	8.24	1	0.446809	5.13	1	MRI(-)/cytology(+)>MRI(-)/cytology(-)
4559	433.285	8.32	1	0.446809	4.365	1	MRI(-)/cytology(+)>MRI(-)/cytology(-)
4572	434.286	8.33	1	0.446809	3.68	1	MRI(-)/cytology(+)>MRI(-)/cytology(-)
4669	448.275	8.14	1	0.446809	3	1	MRI(-)/cytology(+)>MRI(-)/cytology(-)
4770	461.315	8.35	1	0.446809	2.21	0	MRI(-)/cytology(+)>MRI(-)/cytology(-)
4828	476.308	8.17	1	0.446809	2.385	1	MRI(-)/cytology(+)>MRI(-)/cytology(-)
5020	497.255	8.21	1	0.446809	3.09	1	MRI(-)/cytology(+)>MRI(-)/cytology(-)
5165	511.473	13.34	1	0.446809	2.18	1	MRI(-)/cytology(+)>MRI(-)/cytology(-)
5195	520.331	8.28	1	0.446809	2.47	1	MRI(-)/cytology(+)>MRI(-)/cytology(-)
5220	522.334	8.28	1	0.446809	2.155	0	MRI(-)/cytology(+)>MRI(-)/cytology(-)
5398	542.289	8.88	1	0.446809	2.725	1	MRI(-)/cytology(+)<MRI(-)/cytology(-)
6141	702.864	1.64	1	0.446809	6.29	1	MRI(-)/cytology(+)>MRI(-)/cytology(-)
6288	821.89	8.1	1	0.446809	2.765	0	MRI(-)/cytology(+)>MRI(-)/cytology(-)
6348	853.729	17.62	1	0.446809	3.54	1	MRI(-)/cytology(+)>MRI(-)/cytology(-)
6399	881.323	1.66	1	0.446809	4.54	1	MRI(-)/cytology(+)>MRI(-)/cytology(-)
1331	136.047	2.06	0.5	0.93617	3.995	1	MRI(-)/cytology(+)<MRI(-)/cytology(-)
2941	271.133	8.27	0.5	0.93617	2.945	1	MRI(-)/cytology(+)>MRI(-)/cytology(-)
17	56.0517	21.09	0.625	0.808511	3.905	1	MRI(-)/cytology(+)<MRI(-)/cytology(-)
394	85.0408	19.65	0.625	0.808511	3.02	1	MRI(-)/cytology(+)<MRI(-)/cytology(-)
406	85.0418	21.09	0.625	0.808511	3.255	1	MRI(-)/cytology(+)<MRI(-)/cytology(-)
1085	124.086	17.72	0.625	0.808511	5.44	1	MRI(-)/cytology(+)<MRI(-)/cytology(-)
1113	124.087	18.15	0.625	0.808511	5.695	1	MRI(-)/cytology(+)<MRI(-)/cytology(-)
1237	126.09	8.45	0.625	0.808511	2.77	1	MRI(-)/cytology(+)<MRI(-)/cytology(-)
1246	126.092	8.56	0.625	0.808511	2.82	1	MRI(-)/cytology(+)<MRI(-)/cytology(-)
1422	138.092	22.4	0.625	0.808511	4.625	1	MRI(-)/cytology(+)>MRI(-)/cytology(-)
1525	154.086	8.43	0.625	0.808511	2.72	1	MRI(-)/cytology(+)<MRI(-)/cytology(-)
1691	169.058	1.88	0.625	0.808511	4.915	1	MRI(-)/cytology(+)>MRI(-)/cytology(-)
1966	195.121	8.59	0.625	0.808511	4.28	1	MRI(-)/cytology(+)<MRI(-)/cytology(-)
2172	217.104	19.5	0.625	0.808511	5.71	1	MRI(-)/cytology(+)>MRI(-)/cytology(-)
2367	226.95	22.55	0.625	0.808511	5.38	1	MRI(-)/cytology(+)>MRI(-)/cytology(-)
2393	226.952	22.53	0.625	0.808511	5.32	1	MRI(-)/cytology(+)>MRI(-)/cytology(-)
3088	283.176	9.13	0.625	0.808511	3.94	1	MRI(-)/cytology(+)<MRI(-)/cytology(-)
3100	284.18	8.49	0.625	0.808511	3.01	1	MRI(-)/cytology(+)<MRI(-)/cytology(-)
3552	329.188	8.77	0.625	0.808511	4.495	1	MRI(-)/cytology(+)>MRI(-)/cytology(-)
3885	362.925	22.63	0.625	0.808511	5.19	1	MRI(-)/cytology(+)>MRI(-)/cytology(-)
4288	405.097	2.11	0.625	0.808511	4.7	1	MRI(-)/cytology(+)<MRI(-)/cytology(-)
4710	454.235	9.02	0.625	0.808511	3.03	1	MRI(-)/cytology(+)>MRI(-)/cytology(-)
5060	498.901	22.54	0.625	0.808511	5.17	1	MRI(-)/cytology(+)>MRI(-)/cytology(-)
5752	608.386	8.73	0.625	0.808511	6.17	1	MRI(-)/cytology(+)>MRI(-)/cytology(-)
286	82.0527	17.73	0.75	0.680851	2.975	1	MRI(-)/cytology(+)<MRI(-)/cytology(-)
407	85.0419	21.24	0.75	0.680851	3.495	1	MRI(-)/cytology(+)<MRI(-)/cytology(-)
799	106.078	18.25	0.75	0.680851	4.135	1	MRI(-)/cytology(+)<MRI(-)/cytology(-)
892	118.086	2.33	0.75	0.680851	4.2	1	MRI(-)/cytology(+)>MRI(-)/cytology(-)
1210	124.088	15.58	0.75	0.680851	4.83	1	MRI(-)/cytology(+)>MRI(-)/cytology(-)
1257	127.094	8.02	0.75	0.680851	3.04	1	MRI(-)/cytology(+)<MRI(-)/cytology(-)
1341	136.111	19.48	0.75	0.680851	4.05	1	MRI(-)/cytology(+)>MRI(-)/cytology(-)
1887	188.072	9.6	0.75	0.680851	2.69	1	MRI(-)/cytology(+)>MRI(-)/cytology(-)
2072	209.061	7.91	0.75	0.680851	2.68	1	MRI(-)/cytology(+)<MRI(-)/cytology(-)
2275	218.108	8.28	0.75	0.680851	3.51	1	MRI(-)/cytology(+)<MRI(-)/cytology(-)
2699	249.184	13.39	0.75	0.680851	4.71	1	MRI(-)/cytology(+)<MRI(-)/cytology(-)
3275	305.098	8.4	0.75	0.680851	3.015	1	MRI(-)/cytology(+)<MRI(-)/cytology(-)
3295	305.156	19.4	0.75	0.680851	5.17	1	MRI(-)/cytology(+)>MRI(-)/cytology(-)
3506	327.079	7.82	0.75	0.680851	4.06	1	MRI(-)/cytology(+)<MRI(-)/cytology(-)
3538	328.232	8.37	0.75	0.680851	3.67	1	MRI(-)/cytology(+)<MRI(-)/cytology(-)
3577	331.089	1.9	0.75	0.680851	4.48	1	MRI(-)/cytology(+)>MRI(-)/cytology(-)
3604	337.234	17.3	0.75	0.680851	5.465	1	MRI(-)/cytology(+)>MRI(-)/cytology(-)
3630	338.343	19.81	0.75	0.680851	5.835	1	MRI(-)/cytology(+)>MRI(-)/cytology(-)
3667	344.227	7.72	0.75	0.680851	2.59	1	MRI(-)/cytology(+)>MRI(-)/cytology(-)
3687	345.23	8.02	0.75	0.680851	4.42	1	MRI(-)/cytology(+)>MRI(-)/cytology(-)
3939	365.177	8.47	0.75	0.680851	4.02	1	MRI(-)/cytology(+)<MRI(-)/cytology(-)
4444	427.076	1.89	0.75	0.680851	4.31	1	MRI(-)/cytology(+)<MRI(-)/cytology(-)
4569	434.285	9.11	0.75	0.680851	3.07	1	MRI(-)/cytology(+)>MRI(-)/cytology(-)
5404	544.341	13.34	0.75	0.680851	4.19	1	MRI(-)/cytology(+)>MRI(-)/cytology(-)
5469	559.018	1.62	0.75	0.680851	3.96	1	MRI(-)/cytology(+)>MRI(-)/cytology(-)
5505	566.319	13.35	0.75	0.680851	3.8	1	MRI(-)/cytology(+)>MRI(-)/cytology(-)
5730	596.799	22.98	0.75	0.680851	4.365	1	MRI(-)/cytology(+)<MRI(-)/cytology(-)
5916	635.385	8.87	0.75	0.680851	2.83	1	MRI(-)/cytology(+)<MRI(-)/cytology(-)
5920	635.386	8.93	0.75	0.680851	2.675	1	MRI(-)/cytology(+)<MRI(-)/cytology(-)
99	59.0518	17.31	0.875	0.553191	4.605	1	MRI(-)/cytology(+)<MRI(-)/cytology(-)
112	59.0519	14.98	0.875	0.553191	5.15	1	MRI(-)/cytology(+)>MRI(-)/cytology(-)
115	59.052	11.83	0.875	0.553191	5.07	1	MRI(-)/cytology(+)>MRI(-)/cytology(-)
330	82.054	16.73	0.875	0.553191	3.44	1	MRI(-)/cytology(+)<MRI(-)/cytology(-)
523	100.076	7.86	0.875	0.553191	3.76	1	MRI(-)/cytology(+)>MRI(-)/cytology(-)
927	121.084	7.5	0.875	0.553191	4.11	1	MRI(-)/cytology(+)<MRI(-)/cytology(-)
1199	124.087	17.73	0.875	0.553191	4.845	1	MRI(-)/cytology(+)<MRI(-)/cytology(-)
1268	129.055	2.09	0.875	0.553191	4.17	1	MRI(-)/cytology(+)>MRI(-)/cytology(-)
1389	138.09	20.21	0.875	0.553191	3.94	1	MRI(-)/cytology(+)>MRI(-)/cytology(-)
1622	165.113	22.61	0.875	0.553191	4.81	1	MRI(-)/cytology(+)>MRI(-)/cytology(-)
1880	188.07	8.38	0.875	0.553191	3.02	1	MRI(-)/cytology(+)<MRI(-)/cytology(-)
1939	193.157	11.6	0.875	0.553191	4.45	1	MRI(-)/cytology(+)<MRI(-)/cytology(-)
2017	200.237	10.09	0.875	0.553191	4.71	1	MRI(-)/cytology(+)<MRI(-)/cytology(-)
2023	200.973	1.33	0.875	0.553191	4.305	1	MRI(-)/cytology(+)>MRI(-)/cytology(-)
2062	205.087	15.02	0.875	0.553191	4.33	1	MRI(-)/cytology(+)>MRI(-)/cytology(-)
2084	213.112	20.14	0.875	0.553191	4.17	1	MRI(-)/cytology(+)>MRI(-)/cytology(-)
2239	217.105	22.63	0.875	0.553191	5.77	1	MRI(-)/cytology(+)>MRI(-)/cytology(-)
2322	221.073	8.91	0.875	0.553191	3.11	1	MRI(-)/cytology(+)<MRI(-)/cytology(-)
2450	230.142	22.79	0.875	0.553191	4.35	1	MRI(-)/cytology(+)>MRI(-)/cytology(-)
2613	240.181	7.96	0.875	0.553191	3.98	1	MRI(-)/cytology(+)>MRI(-)/cytology(-)
2731	255.066	8.2	0.875	0.553191	2.92	1	MRI(-)/cytology(+)>MRI(-)/cytology(-)
2811	261.131	17.25	0.875	0.553191	5.49	1	MRI(-)/cytology(+)>MRI(-)/cytology(-)
2832	261.131	9.08	0.875	0.553191	4.29	1	MRI(-)/cytology(+)<MRI(-)/cytology(-)
2848	261.132	22.61	0.875	0.553191	5.72	1	MRI(-)/cytology(+)>MRI(-)/cytology(-)
2919	265.03	9.68	0.875	0.553191	2.69	1	MRI(-)/cytology(+)<MRI(-)/cytology(-)
3144	289.105	8.93	0.875	0.553191	2.63	1	MRI(-)/cytology(+)<MRI(-)/cytology(-)
3204	296.152	8.81	0.875	0.553191	3.11	1	MRI(-)/cytology(+)<MRI(-)/cytology(-)
3392	307.176	8.51	0.875	0.553191	4.24	1	MRI(-)/cytology(+)<MRI(-)/cytology(-)
3402	309.178	2.28	0.875	0.553191	3.83	1	MRI(-)/cytology(+)>MRI(-)/cytology(-)
3703	347.168	8.55	0.875	0.553191	3.35	1	MRI(-)/cytology(+)<MRI(-)/cytology(-)
3767	349.185	17.17	0.875	0.553191	4.62	1	MRI(-)/cytology(+)>MRI(-)/cytology(-)
3938	365.177	7.82	0.875	0.553191	3.06	1	MRI(-)/cytology(+)>MRI(-)/cytology(-)
3960	366.183	8.54	0.875	0.553191	3.47	1	MRI(-)/cytology(+)<MRI(-)/cytology(-)
4028	372.261	8.77	0.875	0.553191	3.855	1	MRI(-)/cytology(+)<MRI(-)/cytology(-)
4066	380.819	23.03	0.875	0.553191	4.82	1	MRI(-)/cytology(+)<MRI(-)/cytology(-)
4348	413.267	19.99	0.875	0.553191	4.44	1	MRI(-)/cytology(+)>MRI(-)/cytology(-)
4652	439.24	8.88	0.875	0.553191	3.5	1	MRI(-)/cytology(+)<MRI(-)/cytology(-)
4696	453.229	8.8	0.875	0.553191	3.91	1	MRI(-)/cytology(+)<MRI(-)/cytology(-)
4794	466.805	22.96	0.875	0.553191	4.56	1	MRI(-)/cytology(+)<MRI(-)/cytology(-)
4929	482.266	9.04	0.875	0.553191	3.87	1	MRI(-)/cytology(+)<MRI(-)/cytology(-)
4992	493.303	8.09	0.875	0.553191	2.175	0	MRI(-)/cytology(+)>MRI(-)/cytology(-)
5053	498.899	19.35	0.875	0.553191	2.25	0	MRI(-)/cytology(+)>MRI(-)/cytology(-)
5179	519.436	13.34	0.875	0.553191	2.06	0	MRI(-)/cytology(+)>MRI(-)/cytology(-)
5610	570.322	8.89	0.875	0.553191	3.74	1	MRI(-)/cytology(+)<MRI(-)/cytology(-)
5748	608.384	9.14	0.875	0.553191	3.96	1	MRI(-)/cytology(+)>MRI(-)/cytology(-)
5772	610.387	8.88	0.875	0.553191	2.385	0	MRI(-)/cytology(+)<MRI(-)/cytology(-)
5987	654.416	8.98	0.875	0.553191	1.94	0	MRI(-)/cytology(+)<MRI(-)/cytology(-)
6108	702.397	8.9	0.875	0.553191	2.68	1	MRI(-)/cytology(+)<MRI(-)/cytology(-)
6192	745.416	9.01	0.875	0.553191	2.87	1	MRI(-)/cytology(+)<MRI(-)/cytology(-)
6370	854.728	19.46	0.875	0.553191	3.25	0	MRI(-)/cytology(+)>MRI(-)/cytology(-)
41	59.0509	10.17	1	0.425532	5.31	1	MRI(-)/cytology(+)>MRI(-)/cytology(-)
485	91.0552	1.88	1	0.425532	4.73	1	MRI(-)/cytology(+)>MRI(-)/cytology(-)
1000	123.079	16.84	1	0.425532	4.33	1	MRI(-)/cytology(+)<MRI(-)/cytology(-)
1122	124.087	17.28	1	0.425532	5.47	1	MRI(-)/cytology(+)<MRI(-)/cytology(-)
1280	130.159	8.09	1	0.425532	3.255	1	MRI(-)/cytology(+)>MRI(-)/cytology(-)
1713	171.113	7.88	1	0.425532	3.55	1	MRI(-)/cytology(+)<MRI(-)/cytology(-)
1733	173.077	20.85	1	0.425532	4.42	1	MRI(-)/cytology(+)>MRI(-)/cytology(-)
2214	217.105	16.63	1	0.425532	5.39	1	MRI(-)/cytology(+)>MRI(-)/cytology(-)
2551	239.148	20.03	1	0.425532	5.21	1	MRI(-)/cytology(+)>MRI(-)/cytology(-)
2697	249.182	13.42	1	0.425532	4.67	1	MRI(-)/cytology(+)<MRI(-)/cytology(-)
2716	254.06	9.79	1	0.425532	2.78	1	MRI(-)/cytology(+)>MRI(-)/cytology(-)
2971	275.138	8.18	1	0.425532	2.93	1	MRI(-)/cytology(+)>MRI(-)/cytology(-)
3063	283.175	8.13	1	0.425532	3.56	1	MRI(-)/cytology(+)>MRI(-)/cytology(-)
3089	283.177	8.83	1	0.425532	4.22	1	MRI(-)/cytology(+)<MRI(-)/cytology(-)
3153	290.272	10.31	1	0.425532	3.67	1	MRI(-)/cytology(+)<MRI(-)/cytology(-)
3281	305.156	8.92	1	0.425532	4.27	1	MRI(-)/cytology(+)<MRI(-)/cytology(-)
3454	318.299	10.25	1	0.425532	2.81	1	MRI(-)/cytology(+)<MRI(-)/cytology(-)
3487	322.153	7.83	1	0.425532	2.54	1	MRI(-)/cytology(+)>MRI(-)/cytology(-)
3608	337.236	17.21	1	0.425532	5.38	1	MRI(-)/cytology(+)>MRI(-)/cytology(-)
3914	362.928	22.73	1	0.425532	3.98	1	MRI(-)/cytology(+)>MRI(-)/cytology(-)
4029	372.261	8.88	1	0.425532	3.79	1	MRI(-)/cytology(+)<MRI(-)/cytology(-)
4122	388.254	8.09	1	0.425532	2.715	1	MRI(-)/cytology(+)>MRI(-)/cytology(-)
4124	388.254	7.99	1	0.425532	2.42	1	MRI(-)/cytology(+)>MRI(-)/cytology(-)
4165	393.084	1.68	1	0.425532	5.25	1	MRI(-)/cytology(+)<MRI(-)/cytology(-)
4303	409.203	8.02	1	0.425532	3.33	1	MRI(-)/cytology(+)>MRI(-)/cytology(-)
4407	417.288	8.15	1	0.425532	2.715	1	MRI(-)/cytology(+)>MRI(-)/cytology(-)
4719	457.175	7.99	1	0.425532	2.2	1	MRI(-)/cytology(+)>MRI(-)/cytology(-)
4840	477.31	8.38	1	0.425532	4.345	1	MRI(-)/cytology(+)>MRI(-)/cytology(-)
5161	510.16	2.38	1	0.425532	1.6	0	MRI(-)/cytology(+)>MRI(-)/cytology(-)
5168	512.505	14.22	1	0.425532	4.47	1	MRI(-)/cytology(+)<MRI(-)/cytology(-)
5175	518.317	8.23	1	0.425532	2.02	1	MRI(-)/cytology(+)>MRI(-)/cytology(-)
5686	591.358	8.47	1	0.425532	3.005	1	MRI(-)/cytology(+)>MRI(-)/cytology(-)
5877	634.874	1.62	1	0.425532	6.13	1	MRI(-)/cytology(+)>MRI(-)/cytology(-)
5935	637.41	9.18	1	0.425532	2.225	0	MRI(-)/cytology(+)<MRI(-)/cytology(-)
6002	657.375	9.48	1	0.425532	3.32	1	MRI(-)/cytology(+)<MRI(-)/cytology(-)
6004	658.365	8.93	1	0.425532	2.91	1	MRI(-)/cytology(+)<MRI(-)/cytology(-)
6152	702.869	22.73	1	0.425532	3.655	1	MRI(-)/cytology(+)>MRI(-)/cytology(-)
6291	827.836	1.57	1	0.425532	4.45	1	MRI(-)/cytology(+)<MRI(-)/cytology(-)
6366	854.727	19.79	1	0.425532	3.24	0	MRI(-)/cytology(+)>MRI(-)/cytology(-)
918	120.081	7.65	0.5	0.914894	3.07	1	MRI(-)/cytology(+)<MRI(-)/cytology(-)
1813	178.121	22.61	0.5	0.914894	4.73	1	MRI(-)/cytology(+)>MRI(-)/cytology(-)
1819	178.123	22.67	0.5	0.914894	4.8	1	MRI(-)/cytology(+)>MRI(-)/cytology(-)
2189	217.104	17.16	0.5	0.914894	5.405	1	MRI(-)/cytology(+)>MRI(-)/cytology(-)
2813	261.131	17.36	0.5	0.914894	5.77	1	MRI(-)/cytology(+)>MRI(-)/cytology(-)
2830	261.131	18.14	0.5	0.914894	5.535	1	MRI(-)/cytology(+)>MRI(-)/cytology(-)
3530	328.21	8.52	0.5	0.914894	3.355	1	MRI(-)/cytology(+)<MRI(-)/cytology(-)
3574	329.685	8.87	0.5	0.914894	2.06	1	MRI(-)/cytology(+)<MRI(-)/cytology(-)
4663	446.886	1.71	0.5	0.914894	4.13	1	MRI(-)/cytology(+)<MRI(-)/cytology(-)
4705	454.232	8.77	0.5	0.914894	3.01	1	MRI(-)/cytology(+)<MRI(-)/cytology(-)
4713	455.037	11.73	0.5	0.914894	3.025	1	MRI(-)/cytology(+)>MRI(-)/cytology(-)
5264	525.287	22.51	0.5	0.914894	5.07	1	MRI(-)/cytology(+)>MRI(-)/cytology(-)
5605	570.32	8.81	0.5	0.914894	3.64	1	MRI(-)/cytology(+)<MRI(-)/cytology(-)
5656	585.292	8.83	0.5	0.914894	2	1	MRI(-)/cytology(+)<MRI(-)/cytology(-)
5982	653.422	9.99	0.5	0.914894	2.125	1	MRI(-)/cytology(+)<MRI(-)/cytology(-)
6165	710.847	1.61	0.5	0.914894	4.97	1	MRI(-)/cytology(+)>MRI(-)/cytology(-)
6198	764.577	19.38	0.5	0.914894	3.885	1	MRI(-)/cytology(+)>MRI(-)/cytology(-)
6385	872.83	1.52	0.5	0.914894	5.06	1	MRI(-)/cytology(+)>MRI(-)/cytology(-)
324	82.0539	18.15	0.625	0.787234	3.44	1	MRI(-)/cytology(+)<MRI(-)/cytology(-)
381	85.0406	19.49	0.625	0.787234	2.76	1	MRI(-)/cytology(+)<MRI(-)/cytology(-)
483	91.0551	20.16	0.625	0.787234	4.81	1	MRI(-)/cytology(+)<MRI(-)/cytology(-)
746	102.129	8.48	0.625	0.787234	4.14	1	MRI(-)/cytology(+)<MRI(-)/cytology(-)
756	103.054	8.3	0.625	0.787234	2.76	1	MRI(-)/cytology(+)<MRI(-)/cytology(-)
757	103.054	8.01	0.625	0.787234	2.745	1	MRI(-)/cytology(+)<MRI(-)/cytology(-)
761	103.055	7.65	0.625	0.787234	3.865	1	MRI(-)/cytology(+)>MRI(-)/cytology(-)
798	106.078	18.33	0.625	0.787234	4.055	1	MRI(-)/cytology(+)<MRI(-)/cytology(-)
800	106.078	19.85	0.625	0.787234	4.39	1	MRI(-)/cytology(+)<MRI(-)/cytology(-)
802	106.079	19.72	0.625	0.787234	4.56	1	MRI(-)/cytology(+)<MRI(-)/cytology(-)
911	120.08	7.81	0.625	0.787234	4.945	1	MRI(-)/cytology(+)>MRI(-)/cytology(-)
923	121.082	7.87	0.625	0.787234	3.7	1	MRI(-)/cytology(+)<MRI(-)/cytology(-)
958	122.096	9.41	0.625	0.787234	3.52	1	MRI(-)/cytology(+)<MRI(-)/cytology(-)
1045	123.084	20.54	0.625	0.787234	4.525	1	MRI(-)/cytology(+)<MRI(-)/cytology(-)
1109	124.087	8	0.625	0.787234	3.64	1	MRI(-)/cytology(+)<MRI(-)/cytology(-)
1178	124.087	20.67	0.625	0.787234	5.445	1	MRI(-)/cytology(+)<MRI(-)/cytology(-)
1293	131.047	7.83	0.625	0.787234	3.47	1	MRI(-)/cytology(+)>MRI(-)/cytology(-)
1644	166.086	7.81	0.625	0.787234	4.88	1	MRI(-)/cytology(+)>MRI(-)/cytology(-)
1690	169.044	8.91	0.625	0.787234	2.88	0	MRI(-)/cytology(+)>MRI(-)/cytology(-)
1763	173.078	20	0.625	0.787234	5.005	1	MRI(-)/cytology(+)>MRI(-)/cytology(-)
1903	190.095	9.63	0.625	0.787234	2.965	1	MRI(-)/cytology(+)>MRI(-)/cytology(-)
2188	217.104	18.14	0.625	0.787234	5.615	1	MRI(-)/cytology(+)>MRI(-)/cytology(-)
2530	239.123	8.38	0.625	0.787234	3.245	1	MRI(-)/cytology(+)>MRI(-)/cytology(-)
2653	247.166	19.44	0.625	0.787234	4.145	1	MRI(-)/cytology(+)>MRI(-)/cytology(-)
3137	286.141	12.45	0.625	0.787234	3.42	1	MRI(-)/cytology(+)>MRI(-)/cytology(-)
3504	327.047	1.61	0.625	0.787234	4.24	1	MRI(-)/cytology(+)>MRI(-)/cytology(-)
3798	351.193	7.93	0.625	0.787234	2.905	1	MRI(-)/cytology(+)>MRI(-)/cytology(-)
3879	362.925	1.62	0.625	0.787234	6.08	1	MRI(-)/cytology(+)>MRI(-)/cytology(-)
4482	430.913	22.53	0.625	0.787234	5.355	1	MRI(-)/cytology(+)>MRI(-)/cytology(-)
5002	496.338	13.72	0.625	0.787234	4.225	1	MRI(-)/cytology(+)>MRI(-)/cytology(-)
5381	541.277	9.3	0.625	0.787234	3.23	1	MRI(-)/cytology(+)<MRI(-)/cytology(-)
5481	562.14	7.93	0.625	0.787234	2.33	0	MRI(-)/cytology(+)>MRI(-)/cytology(-)
5482	562.348	8.79	0.625	0.787234	2.22	1	MRI(-)/cytology(+)<MRI(-)/cytology(-)
5548	566.888	22.54	0.625	0.787234	5.21	1	MRI(-)/cytology(+)>MRI(-)/cytology(-)
5614	571.316	8.89	0.625	0.787234	2.955	1	MRI(-)/cytology(+)<MRI(-)/cytology(-)
5757	609.384	8.88	0.625	0.787234	3.235	1	MRI(-)/cytology(+)<MRI(-)/cytology(-)
6421	922.806	1.55	0.625	0.787234	4.96	1	MRI(-)/cytology(+)>MRI(-)/cytology(-)
372	85.0404	17.16	0.75	0.659574	2.86	1	MRI(-)/cytology(+)<MRI(-)/cytology(-)
378	85.0406	18.6	0.75	0.659574	2.64	1	MRI(-)/cytology(+)<MRI(-)/cytology(-)
389	85.0407	15.93	0.75	0.659574	2.89	1	MRI(-)/cytology(+)<MRI(-)/cytology(-)
869	114.066	1.73	0.75	0.659574	4.86	1	MRI(-)/cytology(+)<MRI(-)/cytology(-)
969	122.097	18.17	0.75	0.659574	4.585	1	MRI(-)/cytology(+)>MRI(-)/cytology(-)
984	122.097	18.15	0.75	0.659574	4.595	1	MRI(-)/cytology(+)>MRI(-)/cytology(-)
1013	123.079	21.09	0.75	0.659574	4.64	1	MRI(-)/cytology(+)<MRI(-)/cytology(-)
1189	124.087	18.21	0.75	0.659574	5.58	1	MRI(-)/cytology(+)<MRI(-)/cytology(-)
1364	136.112	22.56	0.75	0.659574	4.18	1	MRI(-)/cytology(+)<MRI(-)/cytology(-)
1610	163.075	10.39	0.75	0.659574	3.53	1	MRI(-)/cytology(+)<MRI(-)/cytology(-)
1753	173.078	7.75	0.75	0.659574	4.6	1	MRI(-)/cytology(+)>MRI(-)/cytology(-)
1952	194.098	8	0.75	0.659574	3.25	1	MRI(-)/cytology(+)<MRI(-)/cytology(-)
2544	239.147	7.72	0.75	0.659574	3.77	1	MRI(-)/cytology(+)<MRI(-)/cytology(-)
2736	255.192	13.49	0.75	0.659574	4.87	1	MRI(-)/cytology(+)<MRI(-)/cytology(-)
2772	259.114	7.8	0.75	0.659574	4.22	1	MRI(-)/cytology(+)>MRI(-)/cytology(-)
2775	259.115	8.47	0.75	0.659574	3.49	1	MRI(-)/cytology(+)<MRI(-)/cytology(-)
3240	300.202	7.8	0.75	0.659574	4.31	1	MRI(-)/cytology(+)>MRI(-)/cytology(-)
3263	303.141	8.43	0.75	0.659574	3.395	1	MRI(-)/cytology(+)<MRI(-)/cytology(-)
3435	318.049	9.69	0.75	0.659574	2.62	1	MRI(-)/cytology(+)>MRI(-)/cytology(-)
3524	328.203	8.56	0.75	0.659574	3.46	1	MRI(-)/cytology(+)<MRI(-)/cytology(-)
3539	328.233	8.73	0.75	0.659574	3.625	1	MRI(-)/cytology(+)<MRI(-)/cytology(-)
3624	338.343	19.7	0.75	0.659574	5.9	1	MRI(-)/cytology(+)>MRI(-)/cytology(-)
3637	339.345	19.7	0.75	0.659574	5.27	1	MRI(-)/cytology(+)>MRI(-)/cytology(-)
4054	376.32	17.06	0.75	0.659574	4.25	1	MRI(-)/cytology(+)>MRI(-)/cytology(-)
4114	388.253	8.17	0.75	0.659574	5.325	1	MRI(-)/cytology(+)>MRI(-)/cytology(-)
4205	393.284	12.79	0.75	0.659574	4.09	1	MRI(-)/cytology(+)<MRI(-)/cytology(-)
4848	478.307	8.23	0.75	0.659574	3.54	1	MRI(-)/cytology(+)>MRI(-)/cytology(-)
5005	496.341	14	0.75	0.659574	4.17	1	MRI(-)/cytology(+)>MRI(-)/cytology(-)
5019	497.255	9.81	0.75	0.659574	3.66	1	MRI(-)/cytology(+)<MRI(-)/cytology(-)
5141	505.341	9.32	0.75	0.659574	3.31	1	MRI(-)/cytology(+)<MRI(-)/cytology(-)
5192	520.33	9.07	0.75	0.659574	4.82	1	MRI(-)/cytology(+)>MRI(-)/cytology(-)
5213	521.337	8.78	0.75	0.659574	3.87	1	MRI(-)/cytology(+)<MRI(-)/cytology(-)
5326	531.202	9.25	0.75	0.659574	1.84	0	MRI(-)/cytology(+)>MRI(-)/cytology(-)
5830	624.377	8.98	0.75	0.659574	2.215	0	MRI(-)/cytology(+)<MRI(-)/cytology(-)
5901	634.878	20.93	0.75	0.659574	1.63	0	MRI(-)/cytology(+)>MRI(-)/cytology(-)
6167	718.83	1.59	0.75	0.659574	5.32	1	MRI(-)/cytology(+)>MRI(-)/cytology(-)
6271	799.851	8.24	0.75	0.659574	3.34	1	MRI(-)/cytology(+)>MRI(-)/cytology(-)
6352	853.729	22.56	0.75	0.659574	4.445	1	MRI(-)/cytology(+)>MRI(-)/cytology(-)
120	59.0522	11.25	0.875	0.531915	4.975	1	MRI(-)/cytology(+)>MRI(-)/cytology(-)
329	82.054	16.34	0.875	0.531915	3.23	1	MRI(-)/cytology(+)<MRI(-)/cytology(-)
337	82.0541	17.14	0.875	0.531915	3.225	1	MRI(-)/cytology(+)<MRI(-)/cytology(-)
380	85.0406	18.03	0.875	0.531915	2.755	1	MRI(-)/cytology(+)<MRI(-)/cytology(-)
383	85.0406	17.94	0.875	0.531915	2.82	1	MRI(-)/cytology(+)<MRI(-)/cytology(-)
706	102.129	8.12	0.875	0.531915	5.02	1	MRI(-)/cytology(+)<MRI(-)/cytology(-)
721	102.129	15.9	0.875	0.531915	5.44	1	MRI(-)/cytology(+)<MRI(-)/cytology(-)
1002	123.079	18.64	0.875	0.531915	4.11	1	MRI(-)/cytology(+)<MRI(-)/cytology(-)
1007	123.079	17.59	0.875	0.531915	4.315	1	MRI(-)/cytology(+)<MRI(-)/cytology(-)
1421	138.092	20.85	0.875	0.531915	3.96	1	MRI(-)/cytology(+)>MRI(-)/cytology(-)
1510	152.07	8.04	0.875	0.531915	3.24	1	MRI(-)/cytology(+)<MRI(-)/cytology(-)
1619	165.111	18.8	0.875	0.531915	4.905	1	MRI(-)/cytology(+)>MRI(-)/cytology(-)
1920	192.137	8.21	0.875	0.531915	3.07	1	MRI(-)/cytology(+)<MRI(-)/cytology(-)
1944	194.079	8.88	0.875	0.531915	2.67	1	MRI(-)/cytology(+)<MRI(-)/cytology(-)
2219	217.105	22.61	0.875	0.531915	5.685	1	MRI(-)/cytology(+)>MRI(-)/cytology(-)
2332	223.062	1.36	0.875	0.531915	4.8	1	MRI(-)/cytology(+)<MRI(-)/cytology(-)
2335	223.063	0.08	0.875	0.531915	4.43	1	MRI(-)/cytology(+)<MRI(-)/cytology(-)
2448	230.14	22.7	0.875	0.531915	4.78	1	MRI(-)/cytology(+)>MRI(-)/cytology(-)
2483	233.099	8.4	0.875	0.531915	3.66	1	MRI(-)/cytology(+)<MRI(-)/cytology(-)
2489	233.1	7.88	0.875	0.531915	4.25	1	MRI(-)/cytology(+)>MRI(-)/cytology(-)
2508	235.18	8.2	0.875	0.531915	3.73	1	MRI(-)/cytology(+)<MRI(-)/cytology(-)
2510	235.181	7.88	0.875	0.531915	3.53	1	MRI(-)/cytology(+)<MRI(-)/cytology(-)
2547	239.148	8.51	0.875	0.531915	4.345	1	MRI(-)/cytology(+)<MRI(-)/cytology(-)
2557	239.148	18.88	0.875	0.531915	4.965	1	MRI(-)/cytology(+)>MRI(-)/cytology(-)
2598	240.097	8.51	0.875	0.531915	3.5	1	MRI(-)/cytology(+)<MRI(-)/cytology(-)
2630	245.096	2.36	0.875	0.531915	3.28	1	MRI(-)/cytology(+)<MRI(-)/cytology(-)
2690	249.118	8.69	0.875	0.531915	3.24	1	MRI(-)/cytology(+)<MRI(-)/cytology(-)
3010	277.127	9.57	0.875	0.531915	4.17	1	MRI(-)/cytology(+)<MRI(-)/cytology(-)
3059	283.174	8.58	0.875	0.531915	4.01	1	MRI(-)/cytology(+)<MRI(-)/cytology(-)
3472	321.15	8.51	0.875	0.531915	3.875	1	MRI(-)/cytology(+)<MRI(-)/cytology(-)
3492	322.156	7.72	0.875	0.531915	2.565	1	MRI(-)/cytology(+)>MRI(-)/cytology(-)
3558	329.228	12.63	0.875	0.531915	5.08	1	MRI(-)/cytology(+)<MRI(-)/cytology(-)
3705	347.169	8.47	0.875	0.531915	3.39	1	MRI(-)/cytology(+)<MRI(-)/cytology(-)
3793	350.188	8.77	0.875	0.531915	3.36	1	MRI(-)/cytology(+)<MRI(-)/cytology(-)
3966	367.151	7.65	0.875	0.531915	2.84	1	MRI(-)/cytology(+)>MRI(-)/cytology(-)
3997	371.228	8.09	0.875	0.531915	3.155	1	MRI(-)/cytology(+)>MRI(-)/cytology(-)
4080	384.114	7.95	0.875	0.531915	2.36	1	MRI(-)/cytology(+)>MRI(-)/cytology(-)
4098	385.121	8.19	0.875	0.531915	2.535	1	MRI(-)/cytology(+)>MRI(-)/cytology(-)
4116	388.253	7.89	0.875	0.531915	2.44	1	MRI(-)/cytology(+)>MRI(-)/cytology(-)
4324	410.208	8.02	0.875	0.531915	3.135	1	MRI(-)/cytology(+)>MRI(-)/cytology(-)
4440	426.177	8.45	0.875	0.531915	2.595	0	MRI(-)/cytology(+)<MRI(-)/cytology(-)
4683	449.279	8.03	0.875	0.531915	2.39	1	MRI(-)/cytology(+)>MRI(-)/cytology(-)
4708	454.233	8.1	0.875	0.531915	3.19	1	MRI(-)/cytology(+)>MRI(-)/cytology(-)
4964	487.175	2.38	0.875	0.531915	2.225	1	MRI(-)/cytology(+)<MRI(-)/cytology(-)
5186	519.44	20.09	0.875	0.531915	3.835	1	MRI(-)/cytology(+)>MRI(-)/cytology(-)
5201	520.334	8.15	0.875	0.531915	2.13	1	MRI(-)/cytology(+)>MRI(-)/cytology(-)
5230	522.354	14.22	0.875	0.531915	4.325	1	MRI(-)/cytology(+)>MRI(-)/cytology(-)
5232	522.355	14.19	0.875	0.531915	4.34	1	MRI(-)/cytology(+)>MRI(-)/cytology(-)
5247	523.344	8.35	0.875	0.531915	1.865	0	MRI(-)/cytology(+)>MRI(-)/cytology(-)
5266	525.288	8.84	0.875	0.531915	4.63	1	MRI(-)/cytology(+)<MRI(-)/cytology(-)
5420	547.333	9.01	0.875	0.531915	3.91	1	MRI(-)/cytology(+)<MRI(-)/cytology(-)
5622	572.313	9.01	0.875	0.531915	1.96	0	MRI(-)/cytology(+)>MRI(-)/cytology(-)
5662	585.308	8.91	0.875	0.531915	3.2	1	MRI(-)/cytology(+)<MRI(-)/cytology(-)
5722	594.394	8.83	0.875	0.531915	2.09	0	MRI(-)/cytology(+)<MRI(-)/cytology(-)
5739	604.79	22.93	0.875	0.531915	5.4	1	MRI(-)/cytology(+)<MRI(-)/cytology(-)
5977	653.414	9.48	0.875	0.531915	2.435	1	MRI(-)/cytology(+)<MRI(-)/cytology(-)
6065	695.188	1.94	0.875	0.531915	4.06	1	MRI(-)/cytology(+)>MRI(-)/cytology(-)
6084	697.44	8.84	0.875	0.531915	2.96	1	MRI(-)/cytology(+)<MRI(-)/cytology(-)
6284	812.834	1.6	0.875	0.531915	5.16	1	MRI(-)/cytology(+)>MRI(-)/cytology(-)
6324	853.722	21.01	0.875	0.531915	3.44	1	MRI(-)/cytology(+)>MRI(-)/cytology(-)
6430	923.778	19.6	0.875	0.531915	3.48	1	MRI(-)/cytology(+)<MRI(-)/cytology(-)
325	82.054	16.18	1	0.404255	2.945	1	MRI(-)/cytology(+)<MRI(-)/cytology(-)
645	102.128	8.24	1	0.404255	4.9	1	MRI(-)/cytology(+)<MRI(-)/cytology(-)
855	111.118	8.79	1	0.404255	3.49	1	MRI(-)/cytology(+)>MRI(-)/cytology(-)
899	118.122	8.25	1	0.404255	2.65	0	MRI(-)/cytology(+)<MRI(-)/cytology(-)
1034	123.08	8.88	1	0.404255	3.72	1	MRI(-)/cytology(+)<MRI(-)/cytology(-)
1271	130.048	6.1	1	0.404255	4.78	1	MRI(-)/cytology(+)>MRI(-)/cytology(-)
1475	145.016	22.95	1	0.404255	4.71	1	MRI(-)/cytology(+)>MRI(-)/cytology(-)
1567	158.964	22.73	1	0.404255	4.17	1	MRI(-)/cytology(+)>MRI(-)/cytology(-)
1577	158.964	1.61	1	0.404255	5.73	1	MRI(-)/cytology(+)>MRI(-)/cytology(-)
1834	182.073	8.07	1	0.404255	3.005	1	MRI(-)/cytology(+)>MRI(-)/cytology(-)
1863	186.219	8.48	1	0.404255	2.78	1	MRI(-)/cytology(+)>MRI(-)/cytology(-)
1908	190.59	8.44	1	0.404255	0.57	0	MRI(-)/cytology(+)<MRI(-)/cytology(-)
1995	198.073	8.18	1	0.404255	2.73	1	MRI(-)/cytology(+)<MRI(-)/cytology(-)
2182	217.104	16.49	1	0.404255	5.26	1	MRI(-)/cytology(+)>MRI(-)/cytology(-)
2207	217.105	7.96	1	0.404255	4.45	1	MRI(-)/cytology(+)>MRI(-)/cytology(-)
2290	218.211	8.27	1	0.404255	2.535	1	MRI(-)/cytology(+)>MRI(-)/cytology(-)
2314	219.216	8.49	1	0.404255	2.8	1	MRI(-)/cytology(+)>MRI(-)/cytology(-)
2331	223.062	2.27	1	0.404255	4.47	1	MRI(-)/cytology(+)<MRI(-)/cytology(-)
2368	226.95	18.75	1	0.404255	2.61	1	MRI(-)/cytology(+)>MRI(-)/cytology(-)
2418	227.953	1.58	1	0.404255	4.62	1	MRI(-)/cytology(+)>MRI(-)/cytology(-)
2420	227.957	1.61	1	0.404255	4.73	1	MRI(-)/cytology(+)>MRI(-)/cytology(-)
2594	239.151	16.82	1	0.404255	5.11	1	MRI(-)/cytology(+)>MRI(-)/cytology(-)
2659	247.167	22.78	1	0.404255	4.37	1	MRI(-)/cytology(+)>MRI(-)/cytology(-)
2853	261.132	8.04	1	0.404255	4.285	1	MRI(-)/cytology(+)>MRI(-)/cytology(-)
2861	261.132	8.87	1	0.404255	4.31	1	MRI(-)/cytology(+)<MRI(-)/cytology(-)
2873	261.133	17.32	1	0.404255	5.295	1	MRI(-)/cytology(+)>MRI(-)/cytology(-)
2882	262.133	8.04	1	0.404255	3.41	1	MRI(-)/cytology(+)>MRI(-)/cytology(-)
2955	273.168	10.39	1	0.404255	4.17	1	MRI(-)/cytology(+)<MRI(-)/cytology(-)
3021	277.18	12.18	1	0.404255	5.16	1	MRI(-)/cytology(+)<MRI(-)/cytology(-)
3197	295.883	23.44	1	0.404255	4.77	1	MRI(-)/cytology(+)>MRI(-)/cytology(-)
3247	301.14	19.39	1	0.404255	4.155	1	MRI(-)/cytology(+)>MRI(-)/cytology(-)
3302	305.156	7.94	1	0.404255	2.92	1	MRI(-)/cytology(+)>MRI(-)/cytology(-)
3346	305.158	8.04	1	0.404255	3.52	1	MRI(-)/cytology(+)>MRI(-)/cytology(-)
3347	305.158	17.19	1	0.404255	5	1	MRI(-)/cytology(+)>MRI(-)/cytology(-)
3410	311.186	12.4	1	0.404255	4.67	1	MRI(-)/cytology(+)<MRI(-)/cytology(-)
3497	324.136	7.95	1	0.404255	2.715	1	MRI(-)/cytology(+)>MRI(-)/cytology(-)
3512	327.2	7.94	1	0.404255	3.46	1	MRI(-)/cytology(+)>MRI(-)/cytology(-)
3543	328.233	8.13	1	0.404255	4.51	1	MRI(-)/cytology(+)>MRI(-)/cytology(-)
3563	329.235	8.58	1	0.404255	3.175	1	MRI(-)/cytology(+)<MRI(-)/cytology(-)
3690	345.875	22.92	1	0.404255	4.76	1	MRI(-)/cytology(+)<MRI(-)/cytology(-)
3730	349.182	8.2	1	0.404255	3.335	1	MRI(-)/cytology(+)>MRI(-)/cytology(-)
3810	351.202	8.13	1	0.404255	3.27	1	MRI(-)/cytology(+)>MRI(-)/cytology(-)
3948	365.18	8.04	1	0.404255	3.85	1	MRI(-)/cytology(+)>MRI(-)/cytology(-)
4013	372.235	8.05	1	0.404255	2.505	0	MRI(-)/cytology(+)>MRI(-)/cytology(-)
4049	376.259	12.78	1	0.404255	3.13	1	MRI(-)/cytology(+)<MRI(-)/cytology(-)
4107	385.293	16.06	1	0.404255	3.91	1	MRI(-)/cytology(+)>MRI(-)/cytology(-)
4127	388.255	8.15	1	0.404255	2.88	1	MRI(-)/cytology(+)>MRI(-)/cytology(-)
4130	388.256	8.2	1	0.404255	4.43	1	MRI(-)/cytology(+)>MRI(-)/cytology(-)
4150	390.261	8.12	1	0.404255	3.205	1	MRI(-)/cytology(+)>MRI(-)/cytology(-)
4155	391.192	8.03	1	0.404255	3.01	1	MRI(-)/cytology(+)>MRI(-)/cytology(-)
4156	391.192	8.2	1	0.404255	3.385	1	MRI(-)/cytology(+)>MRI(-)/cytology(-)
4281	404.248	8.18	1	0.404255	3.65	1	MRI(-)/cytology(+)>MRI(-)/cytology(-)
4286	404.251	8.05	1	0.404255	3.015	1	MRI(-)/cytology(+)>MRI(-)/cytology(-)
4290	405.255	8.18	1	0.404255	2.97	1	MRI(-)/cytology(+)>MRI(-)/cytology(-)
4305	409.204	8.13	1	0.404255	4.945	1	MRI(-)/cytology(+)>MRI(-)/cytology(-)
4317	410.205	8.1	1	0.404255	3.995	1	MRI(-)/cytology(+)>MRI(-)/cytology(-)
4391	416.285	8.29	1	0.404255	2.955	1	MRI(-)/cytology(+)>MRI(-)/cytology(-)
4394	416.287	8.14	1	0.404255	3.025	1	MRI(-)/cytology(+)>MRI(-)/cytology(-)
4414	418.287	8.15	1	0.404255	2.725	1	MRI(-)/cytology(+)>MRI(-)/cytology(-)
4471	430.912	22.72	1	0.404255	4.185	1	MRI(-)/cytology(+)>MRI(-)/cytology(-)
4524	432.279	8.09	1	0.404255	2.57	1	MRI(-)/cytology(+)>MRI(-)/cytology(-)
4530	432.28	8.18	1	0.404255	6.11	1	MRI(-)/cytology(+)>MRI(-)/cytology(-)
4533	432.28	8.17	1	0.404255	5.28	1	MRI(-)/cytology(+)>MRI(-)/cytology(-)
4551	433.282	8.31	1	0.404255	3.91	1	MRI(-)/cytology(+)>MRI(-)/cytology(-)
4557	433.283	8.18	1	0.404255	3.64	1	MRI(-)/cytology(+)>MRI(-)/cytology(-)
4562	434.279	8.17	1	0.404255	2.145	1	MRI(-)/cytology(+)>MRI(-)/cytology(-)
4728	459.279	8.26	1	0.404255	2.835	1	MRI(-)/cytology(+)>MRI(-)/cytology(-)
4776	462.314	8.32	1	0.404255	2.78	1	MRI(-)/cytology(+)>MRI(-)/cytology(-)
4798	474.289	8.33	1	0.404255	3.655	1	MRI(-)/cytology(+)>MRI(-)/cytology(-)
4814	476.305	8.2	1	0.404255	5.06	1	MRI(-)/cytology(+)>MRI(-)/cytology(-)
4850	478.308	8.38	1	0.404255	3.49	1	MRI(-)/cytology(+)>MRI(-)/cytology(-)
4853	478.309	9.17	1	0.404255	2.885	1	MRI(-)/cytology(+)>MRI(-)/cytology(-)
4854	478.31	8.45	1	0.404255	3.63	1	MRI(-)/cytology(+)>MRI(-)/cytology(-)
4874	479.317	8.36	1	0.404255	2.91	1	MRI(-)/cytology(+)>MRI(-)/cytology(-)
4886	481.259	8.26	1	0.404255	3.23	1	MRI(-)/cytology(+)>MRI(-)/cytology(-)
4943	483.27	8.31	1	0.404255	5.23	1	MRI(-)/cytology(+)<MRI(-)/cytology(-)
5033	498.257	8.84	1	0.404255	2.995	1	MRI(-)/cytology(+)<MRI(-)/cytology(-)
5107	503.306	8.29	1	0.404255	2.58	1	MRI(-)/cytology(+)>MRI(-)/cytology(-)
5131	504.339	8.33	1	0.404255	5.875	1	MRI(-)/cytology(+)>MRI(-)/cytology(-)
5159	509.157	2.38	1	0.404255	2.07	1	MRI(-)/cytology(+)<MRI(-)/cytology(-)
5197	520.332	8.36	1	0.404255	4.15	1	MRI(-)/cytology(+)>MRI(-)/cytology(-)
5211	521.336	8.45	1	0.404255	4.08	1	MRI(-)/cytology(+)>MRI(-)/cytology(-)
5221	522.336	8.36	1	0.404255	3.15	1	MRI(-)/cytology(+)>MRI(-)/cytology(-)
5238	523.334	8.46	1	0.404255	2.795	0	MRI(-)/cytology(+)>MRI(-)/cytology(-)
5246	523.344	8.79	1	0.404255	2.06	0	MRI(-)/cytology(+)<MRI(-)/cytology(-)
5435	548.365	8.28	1	0.404255	3.265	1	MRI(-)/cytology(+)>MRI(-)/cytology(-)
5494	564.361	8.46	1	0.404255	3.995	1	MRI(-)/cytology(+)>MRI(-)/cytology(-)
5498	565.361	8.47	1	0.404255	3.4	1	MRI(-)/cytology(+)>MRI(-)/cytology(-)
5554	566.889	21.33	1	0.404255	2.345	0	MRI(-)/cytology(+)<MRI(-)/cytology(-)
5606	570.32	8.43	1	0.404255	2.825	1	MRI(-)/cytology(+)>MRI(-)/cytology(-)
5685	591.357	8.55	1	0.404255	3.24	1	MRI(-)/cytology(+)>MRI(-)/cytology(-)
5776	610.39	8.5	1	0.404255	3.46	0	MRI(-)/cytology(+)>MRI(-)/cytology(-)
5961	652.409	9.99	1	0.404255	3.12	1	MRI(-)/cytology(+)>MRI(-)/cytology(-)
6024	668.87	1.71	1	0.404255	4.6	1	MRI(-)/cytology(+)<MRI(-)/cytology(-)
6173	724.472	8.95	1	0.404255	3.315	1	MRI(-)/cytology(+)<MRI(-)/cytology(-)
6247	779.866	8.24	1	0.404255	2.945	1	MRI(-)/cytology(+)>MRI(-)/cytology(-)
6304	838.839	21.33	1	0.404255	2.14	0	MRI(-)/cytology(+)<MRI(-)/cytology(-)
6305	838.839	1.64	1	0.404255	6.1	1	MRI(-)/cytology(+)>MRI(-)/cytology(-)
6321	847.331	1.53	1	0.404255	4.135	1	MRI(-)/cytology(+)>MRI(-)/cytology(-)
6322	847.334	1.66	1	0.404255	4.61	1	MRI(-)/cytology(+)>MRI(-)/cytology(-)
6333	853.725	17.75	1	0.404255	2.9	0	MRI(-)/cytology(+)>MRI(-)/cytology(-)
6356	853.731	22.63	1	0.404255	3.88	1	MRI(-)/cytology(+)>MRI(-)/cytology(-)
6388	873.33	1.58	1	0.404255	4.735	1	MRI(-)/cytology(+)>MRI(-)/cytology(-)
6504	1042.8	22.39	1	0.404255	1.95	0	MRI(-)/cytology(+)>MRI(-)/cytology(-)
312	82.0537	15.32	0.5	0.893617	2.65	1	MRI(-)/cytology(+)<MRI(-)/cytology(-)
479	91.055	18.89	0.5	0.893617	4.28	1	MRI(-)/cytology(+)<MRI(-)/cytology(-)
790	106.077	19.42	0.5	0.893617	4.36	1	MRI(-)/cytology(+)<MRI(-)/cytology(-)
792	106.078	20.02	0.5	0.893617	4.48	1	MRI(-)/cytology(+)<MRI(-)/cytology(-)
795	106.078	18.82	0.5	0.893617	3.86	1	MRI(-)/cytology(+)<MRI(-)/cytology(-)
1102	124.087	18.65	0.5	0.893617	5.03	1	MRI(-)/cytology(+)<MRI(-)/cytology(-)
1272	130.05	1.92	0.5	0.893617	5.945	1	MRI(-)/cytology(+)>MRI(-)/cytology(-)
1519	154.085	8.54	0.5	0.893617	2.675	0	MRI(-)/cytology(+)<MRI(-)/cytology(-)
1522	154.086	8.45	0.5	0.893617	2.565	0	MRI(-)/cytology(+)<MRI(-)/cytology(-)
1751	173.078	18.16	0.5	0.893617	4.895	1	MRI(-)/cytology(+)>MRI(-)/cytology(-)
2734	255.067	8.07	0.5	0.893617	2.78	1	MRI(-)/cytology(+)>MRI(-)/cytology(-)
3973	371.099	3.69	0.5	0.893617	4.45	1	MRI(-)/cytology(+)<MRI(-)/cytology(-)
3996	371.228	8.95	0.5	0.893617	3.95	1	MRI(-)/cytology(+)<MRI(-)/cytology(-)
4473	430.912	18.8	0.5	0.893617	4.665	1	MRI(-)/cytology(+)>MRI(-)/cytology(-)
4711	454.237	8.58	0.5	0.893617	3.155	1	MRI(-)/cytology(+)<MRI(-)/cytology(-)
4712	455.037	11.85	0.5	0.893617	3.39	1	MRI(-)/cytology(+)>MRI(-)/cytology(-)
4907	481.262	22.7	0.5	0.893617	5.145	1	MRI(-)/cytology(+)>MRI(-)/cytology(-)
5044	498.899	18.86	0.5	0.893617	4.53	0	MRI(-)/cytology(+)>MRI(-)/cytology(-)
5503	565.365	8.58	0.5	0.893617	5.87	1	MRI(-)/cytology(+)>MRI(-)/cytology(-)
5652	585.271	19.54	0.5	0.893617	3.735	1	MRI(-)/cytology(+)>MRI(-)/cytology(-)
5744	607.25	19.4	0.5	0.893617	2.9	0	MRI(-)/cytology(+)>MRI(-)/cytology(-)
5767	609.391	9.44	0.5	0.893617	2.9	1	MRI(-)/cytology(+)<MRI(-)/cytology(-)
6571	1185.27	7.97	0.5	0.893617	2.135	0	MRI(-)/cytology(+)>MRI(-)/cytology(-)
482	91.0551	18.26	0.625	0.765957	4.06	1	MRI(-)/cytology(+)<MRI(-)/cytology(-)
779	105.032	8.48	0.625	0.765957	2.935	0	MRI(-)/cytology(+)>MRI(-)/cytology(-)
1537	156.012	9.78	0.625	0.765957	2.66	1	MRI(-)/cytology(+)>MRI(-)/cytology(-)
2220	217.105	17.38	0.625	0.765957	5.81	1	MRI(-)/cytology(+)>MRI(-)/cytology(-)
2282	218.111	18.85	0.625	0.765957	4.71	1	MRI(-)/cytology(+)>MRI(-)/cytology(-)
2412	227.175	8.28	0.625	0.765957	3.94	1	MRI(-)/cytology(+)>MRI(-)/cytology(-)
2729	255.065	8.33	0.625	0.765957	2.82	1	MRI(-)/cytology(+)>MRI(-)/cytology(-)
2970	274.276	22.63	0.625	0.765957	4.78	1	MRI(-)/cytology(+)>MRI(-)/cytology(-)
2986	276.041	9.73	0.625	0.765957	3.35	1	MRI(-)/cytology(+)>MRI(-)/cytology(-)
2995	277.043	9.79	0.625	0.765957	3.015	1	MRI(-)/cytology(+)>MRI(-)/cytology(-)
3282	305.156	16.52	0.625	0.765957	5.305	1	MRI(-)/cytology(+)>MRI(-)/cytology(-)
3505	327.055	1.57	0.625	0.765957	4.21	1	MRI(-)/cytology(+)>MRI(-)/cytology(-)
3603	337.234	17.34	0.625	0.765957	5.5	1	MRI(-)/cytology(+)>MRI(-)/cytology(-)
3704	347.168	8.46	0.625	0.765957	3.49	1	MRI(-)/cytology(+)<MRI(-)/cytology(-)
3897	362.927	22.53	0.625	0.765957	5	1	MRI(-)/cytology(+)>MRI(-)/cytology(-)
3928	363.926	1.59	0.625	0.765957	5.02	1	MRI(-)/cytology(+)>MRI(-)/cytology(-)
4266	399.558	9.65	0.625	0.765957	1.02	0	MRI(-)/cytology(+)>MRI(-)/cytology(-)
4347	413.267	18.83	0.625	0.765957	4.76	1	MRI(-)/cytology(+)>MRI(-)/cytology(-)
4607	437.235	20.04	0.625	0.765957	5.13	1	MRI(-)/cytology(+)>MRI(-)/cytology(-)
4615	437.236	8.17	0.625	0.765957	3.28	1	MRI(-)/cytology(+)>MRI(-)/cytology(-)
4953	484.276	8.91	0.625	0.765957	2.24	1	MRI(-)/cytology(+)<MRI(-)/cytology(-)
5029	498.255	8.14	0.625	0.765957	3.05	1	MRI(-)/cytology(+)>MRI(-)/cytology(-)
5057	498.9	22.53	0.625	0.765957	5.02	1	MRI(-)/cytology(+)>MRI(-)/cytology(-)
5547	566.888	22.53	0.625	0.765957	5.04	1	MRI(-)/cytology(+)>MRI(-)/cytology(-)
5555	566.889	1.59	0.625	0.765957	6.2	1	MRI(-)/cytology(+)>MRI(-)/cytology(-)
5639	580.355	9.33	0.625	0.765957	2.42	1	MRI(-)/cytology(+)<MRI(-)/cytology(-)
5875	634.874	22.53	0.625	0.765957	4.93	1	MRI(-)/cytology(+)>MRI(-)/cytology(-)
5979	653.416	9.11	0.625	0.765957	2.58	1	MRI(-)/cytology(+)<MRI(-)/cytology(-)
6008	658.367	8.87	0.625	0.765957	2.9	1	MRI(-)/cytology(+)<MRI(-)/cytology(-)
6255	795.788	19.93	0.625	0.765957	3.73	1	MRI(-)/cytology(+)>MRI(-)/cytology(-)
6543	1118.77	1.61	0.625	0.765957	4.83	1	MRI(-)/cytology(+)>MRI(-)/cytology(-)
157	59.0524	15.64	0.75	0.638298	4.89	1	MRI(-)/cytology(+)>MRI(-)/cytology(-)
224	69.0337	2.16	0.75	0.638298	4.25	1	MRI(-)/cytology(+)>MRI(-)/cytology(-)
313	82.0537	15.93	0.75	0.638298	3.51	1	MRI(-)/cytology(+)<MRI(-)/cytology(-)
385	85.0406	18.83	0.75	0.638298	3.04	1	MRI(-)/cytology(+)<MRI(-)/cytology(-)
399	85.041	16.83	0.75	0.638298	3.23	1	MRI(-)/cytology(+)<MRI(-)/cytology(-)
419	87.9244	24.1	0.75	0.638298	4.93	1	MRI(-)/cytology(+)>MRI(-)/cytology(-)
422	87.9256	24.13	0.75	0.638298	4.87	1	MRI(-)/cytology(+)>MRI(-)/cytology(-)
896	118.087	2.34	0.75	0.638298	4.07	1	MRI(-)/cytology(+)>MRI(-)/cytology(-)
1058	123.099	20.17	0.75	0.638298	4.51	1	MRI(-)/cytology(+)>MRI(-)/cytology(-)
1216	124.088	18.44	0.75	0.638298	5.71	1	MRI(-)/cytology(+)<MRI(-)/cytology(-)
1384	138.09	18.89	0.75	0.638298	4.31	1	MRI(-)/cytology(+)>MRI(-)/cytology(-)
1392	138.09	22.26	0.75	0.638298	4.16	1	MRI(-)/cytology(+)>MRI(-)/cytology(-)
1495	148.06	7.83	0.75	0.638298	3.455	1	MRI(-)/cytology(+)>MRI(-)/cytology(-)
1620	165.112	19.47	0.75	0.638298	4.99	1	MRI(-)/cytology(+)>MRI(-)/cytology(-)
1666	166.098	19.12	0.75	0.638298	4.98	1	MRI(-)/cytology(+)>MRI(-)/cytology(-)
1725	173.077	8.2	0.75	0.638298	3.9	1	MRI(-)/cytology(+)<MRI(-)/cytology(-)
1752	173.078	8.05	0.75	0.638298	4.08	1	MRI(-)/cytology(+)<MRI(-)/cytology(-)
1876	188.07	7.81	0.75	0.638298	3.295	1	MRI(-)/cytology(+)>MRI(-)/cytology(-)
2273	218.107	19.48	0.75	0.638298	4.32	1	MRI(-)/cytology(+)>MRI(-)/cytology(-)
2301	219.079	1.63	0.75	0.638298	4.89	1	MRI(-)/cytology(+)>MRI(-)/cytology(-)
2303	219.083	1.67	0.75	0.638298	4.95	1	MRI(-)/cytology(+)>MRI(-)/cytology(-)
2888	262.134	19.38	0.75	0.638298	4.58	1	MRI(-)/cytology(+)>MRI(-)/cytology(-)
2914	263.074	2.08	0.75	0.638298	4.44	1	MRI(-)/cytology(+)>MRI(-)/cytology(-)
2958	274.092	4.28	0.75	0.638298	4.65	1	MRI(-)/cytology(+)>MRI(-)/cytology(-)
3003	277.125	7.89	0.75	0.638298	4.83	1	MRI(-)/cytology(+)>MRI(-)/cytology(-)
3290	305.156	18.8	0.75	0.638298	5.225	1	MRI(-)/cytology(+)>MRI(-)/cytology(-)
3655	340.346	19.74	0.75	0.638298	4.395	1	MRI(-)/cytology(+)>MRI(-)/cytology(-)
3674	344.228	8.54	0.75	0.638298	3.96	1	MRI(-)/cytology(+)<MRI(-)/cytology(-)
3853	360.221	7.89	0.75	0.638298	2.98	1	MRI(-)/cytology(+)>MRI(-)/cytology(-)
3930	364.218	10.15	0.75	0.638298	3.09	1	MRI(-)/cytology(+)<MRI(-)/cytology(-)
4073	384.112	8.21	0.75	0.638298	4.555	1	MRI(-)/cytology(+)>MRI(-)/cytology(-)
4199	393.211	8.1	0.75	0.638298	2.965	1	MRI(-)/cytology(+)>MRI(-)/cytology(-)
4511	430.924	8.11	0.75	0.638298	2.67	1	MRI(-)/cytology(+)<MRI(-)/cytology(-)
4567	434.284	8.11	0.75	0.638298	3.535	1	MRI(-)/cytology(+)>MRI(-)/cytology(-)
4592	437.232	20.16	0.75	0.638298	4.56	1	MRI(-)/cytology(+)>MRI(-)/cytology(-)
4639	438.239	8.17	0.75	0.638298	2.8	1	MRI(-)/cytology(+)>MRI(-)/cytology(-)
4715	455.178	7.74	0.75	0.638298	2.605	1	MRI(-)/cytology(+)>MRI(-)/cytology(-)
4906	481.262	19.4	0.75	0.638298	4.39	1	MRI(-)/cytology(+)>MRI(-)/cytology(-)
4933	482.827	22.56	0.75	0.638298	4.195	1	MRI(-)/cytology(+)<MRI(-)/cytology(-)
5445	549.366	8.84	0.75	0.638298	3.5	1	MRI(-)/cytology(+)<MRI(-)/cytology(-)
5780	610.398	9.43	0.75	0.638298	1.885	0	MRI(-)/cytology(+)<MRI(-)/cytology(-)
5827	623.305	13.81	0.75	0.638298	3.715	1	MRI(-)/cytology(+)>MRI(-)/cytology(-)
6474	982.807	1.62	0.75	0.638298	4.91	1	MRI(-)/cytology(+)>MRI(-)/cytology(-)
15	55.9762	1.33	0.875	0.510638	4.375	1	MRI(-)/cytology(+)>MRI(-)/cytology(-)
31	56.0528	17.78	0.875	0.510638	3.655	1	MRI(-)/cytology(+)<MRI(-)/cytology(-)
59	59.0515	13.48	0.875	0.510638	5.28	1	MRI(-)/cytology(+)>MRI(-)/cytology(-)
160	59.0524	2.37	0.875	0.510638	5.19	1	MRI(-)/cytology(+)>MRI(-)/cytology(-)
190	61.0311	2.27	0.875	0.510638	4.86	1	MRI(-)/cytology(+)>MRI(-)/cytology(-)
287	82.0527	17.06	0.875	0.510638	2.84	1	MRI(-)/cytology(+)<MRI(-)/cytology(-)
321	82.0539	17.74	0.875	0.510638	2.735	1	MRI(-)/cytology(+)<MRI(-)/cytology(-)
323	82.0539	16.6	0.875	0.510638	3.02	1	MRI(-)/cytology(+)<MRI(-)/cytology(-)
331	82.054	16.67	0.875	0.510638	3.045	1	MRI(-)/cytology(+)<MRI(-)/cytology(-)
332	82.0541	15.82	0.875	0.510638	3.3	1	MRI(-)/cytology(+)<MRI(-)/cytology(-)
391	85.0408	19.12	0.875	0.510638	3.05	1	MRI(-)/cytology(+)<MRI(-)/cytology(-)
685	102.129	9.92	0.875	0.510638	5.22	1	MRI(-)/cytology(+)<MRI(-)/cytology(-)
1049	123.099	19.59	0.875	0.510638	4.64	1	MRI(-)/cytology(+)>MRI(-)/cytology(-)
1078	124.084	19.16	0.875	0.510638	4.315	1	MRI(-)/cytology(+)<MRI(-)/cytology(-)
1329	136.022	17.96	0.875	0.510638	4.29	1	MRI(-)/cytology(+)<MRI(-)/cytology(-)
1445	141.958	23.6	0.875	0.510638	5.71	1	MRI(-)/cytology(+)>MRI(-)/cytology(-)
1481	145.106	2.28	0.875	0.510638	3.94	1	MRI(-)/cytology(+)>MRI(-)/cytology(-)
1517	153.074	8.21	0.875	0.510638	3.555	1	MRI(-)/cytology(+)<MRI(-)/cytology(-)
1758	173.078	22.47	0.875	0.510638	4.96	1	MRI(-)/cytology(+)>MRI(-)/cytology(-)
2041	202.87	23.47	0.875	0.510638	5.26	1	MRI(-)/cytology(+)<MRI(-)/cytology(-)
2078	211.169	11.62	0.875	0.510638	4.58	1	MRI(-)/cytology(+)<MRI(-)/cytology(-)
2123	214.253	20.94	0.875	0.510638	3.36	1	MRI(-)/cytology(+)>MRI(-)/cytology(-)
2190	217.104	17.16	0.875	0.510638	5.17	1	MRI(-)/cytology(+)>MRI(-)/cytology(-)
2330	223.062	1.26	0.875	0.510638	4.53	1	MRI(-)/cytology(+)<MRI(-)/cytology(-)
2333	223.062	0.1	0.875	0.510638	4.69	1	MRI(-)/cytology(+)<MRI(-)/cytology(-)
2562	239.148	16.94	0.875	0.510638	5.21	1	MRI(-)/cytology(+)>MRI(-)/cytology(-)
2564	239.149	17.46	0.875	0.510638	5.205	1	MRI(-)/cytology(+)>MRI(-)/cytology(-)
2625	243.018	1.35	0.875	0.510638	4.32	1	MRI(-)/cytology(+)>MRI(-)/cytology(-)
2629	245.017	1.33	0.875	0.510638	4.1	1	MRI(-)/cytology(+)>MRI(-)/cytology(-)
2741	256.054	9.73	0.875	0.510638	2.805	1	MRI(-)/cytology(+)>MRI(-)/cytology(-)
2746	256.264	16.38	0.875	0.510638	5.22	1	MRI(-)/cytology(+)>MRI(-)/cytology(-)
2880	262.133	7.81	0.875	0.510638	2.925	1	MRI(-)/cytology(+)>MRI(-)/cytology(-)
3017	277.179	14.34	0.875	0.510638	5.55	1	MRI(-)/cytology(+)<MRI(-)/cytology(-)
3045	282.28	16.71	0.875	0.510638	5.59	1	MRI(-)/cytology(+)>MRI(-)/cytology(-)
3073	283.175	18.15	0.875	0.510638	5.025	1	MRI(-)/cytology(+)>MRI(-)/cytology(-)
3085	283.176	7.94	0.875	0.510638	3.56	1	MRI(-)/cytology(+)>MRI(-)/cytology(-)
3114	284.207	8.75	0.875	0.510638	3.64	1	MRI(-)/cytology(+)<MRI(-)/cytology(-)
3314	305.157	22.7	0.875	0.510638	5.26	1	MRI(-)/cytology(+)>MRI(-)/cytology(-)
3383	306.162	7.93	0.875	0.510638	2.935	1	MRI(-)/cytology(+)>MRI(-)/cytology(-)
3421	315.154	8.83	0.875	0.510638	3.09	1	MRI(-)/cytology(+)<MRI(-)/cytology(-)
3962	366.837	22.97	0.875	0.510638	4.3	1	MRI(-)/cytology(+)<MRI(-)/cytology(-)
4026	372.26	7.94	0.875	0.510638	3.04	1	MRI(-)/cytology(+)>MRI(-)/cytology(-)
4050	376.259	12.48	0.875	0.510638	4.95	1	MRI(-)/cytology(+)<MRI(-)/cytology(-)
4255	398.905	1.33	0.875	0.510638	3.76	1	MRI(-)/cytology(+)>MRI(-)/cytology(-)
4295	408.412	7.97	0.875	0.510638	1.53	0	MRI(-)/cytology(+)<MRI(-)/cytology(-)
4430	425.133	11.97	0.875	0.510638	3.13	1	MRI(-)/cytology(+)>MRI(-)/cytology(-)
4434	425.173	8.17	0.875	0.510638	3.45	1	MRI(-)/cytology(+)>MRI(-)/cytology(-)
4512	431.166	7.74	0.875	0.510638	2.375	1	MRI(-)/cytology(+)>MRI(-)/cytology(-)
4523	432.279	8.09	0.875	0.510638	2.62	1	MRI(-)/cytology(+)>MRI(-)/cytology(-)
4537	432.281	8.87	0.875	0.510638	4.845	1	MRI(-)/cytology(+)<MRI(-)/cytology(-)
4598	437.234	18.89	0.875	0.510638	4.65	1	MRI(-)/cytology(+)>MRI(-)/cytology(-)
4830	476.308	17.12	0.875	0.510638	4.805	1	MRI(-)/cytology(+)>MRI(-)/cytology(-)
4851	478.308	8.3	0.875	0.510638	3.18	1	MRI(-)/cytology(+)>MRI(-)/cytology(-)
4896	481.261	18.86	0.875	0.510638	4.7	1	MRI(-)/cytology(+)>MRI(-)/cytology(-)
4921	482.262	8.82	0.875	0.510638	3.98	1	MRI(-)/cytology(+)<MRI(-)/cytology(-)
4973	492.269	9.7	0.875	0.510638	3.25	1	MRI(-)/cytology(+)<MRI(-)/cytology(-)
4980	492.3	8.23	0.875	0.510638	2.735	1	MRI(-)/cytology(+)>MRI(-)/cytology(-)
5096	501.173	10.8	0.875	0.510638	1.88	0	MRI(-)/cytology(+)>MRI(-)/cytology(-)
5207	521.335	8.98	0.875	0.510638	3.96	1	MRI(-)/cytology(+)>MRI(-)/cytology(-)
5291	526.292	8.87	0.875	0.510638	3.86	1	MRI(-)/cytology(+)<MRI(-)/cytology(-)
5308	528.147	1.94	0.875	0.510638	4.07	1	MRI(-)/cytology(+)>MRI(-)/cytology(-)
5412	547.329	8.39	0.875	0.510638	2.885	0	MRI(-)/cytology(+)>MRI(-)/cytology(-)
5514	566.364	8.88	0.875	0.510638	2.73	1	MRI(-)/cytology(+)<MRI(-)/cytology(-)
5665	585.311	8.75	0.875	0.510638	3.21	1	MRI(-)/cytology(+)<MRI(-)/cytology(-)
5684	591.357	8.84	0.875	0.510638	3.595	1	MRI(-)/cytology(+)<MRI(-)/cytology(-)
5838	624.759	23.01	0.875	0.510638	4.495	1	MRI(-)/cytology(+)<MRI(-)/cytology(-)
5895	634.876	20.83	0.875	0.510638	1.44	0	MRI(-)/cytology(+)>MRI(-)/cytology(-)
6040	680.437	8.48	0.875	0.510638	3.13	1	MRI(-)/cytology(+)>MRI(-)/cytology(-)
6136	702.863	19.36	0.875	0.510638	1.3	0	MRI(-)/cytology(+)>MRI(-)/cytology(-)
6358	854.724	18.54	0.875	0.510638	3.48	1	MRI(-)/cytology(+)>MRI(-)/cytology(-)
6531	1093.45	1.71	0.875	0.510638	4.34	1	MRI(-)/cytology(+)<MRI(-)/cytology(-)
114	59.052	8.75	1	0.382979	5.175	1	MRI(-)/cytology(+)>MRI(-)/cytology(-)
524	100.076	8.43	1	0.382979	3.645	1	MRI(-)/cytology(+)<MRI(-)/cytology(-)
777	104.106	1.7	1	0.382979	4.33	1	MRI(-)/cytology(+)>MRI(-)/cytology(-)
1126	124.087	17.21	1	0.382979	5.235	1	MRI(-)/cytology(+)<MRI(-)/cytology(-)
1509	152.07	8.38	1	0.382979	3.07	1	MRI(-)/cytology(+)<MRI(-)/cytology(-)
1794	174.186	8.35	1	0.382979	2.845	1	MRI(-)/cytology(+)>MRI(-)/cytology(-)
1795	174.186	8.36	1	0.382979	2.675	0	MRI(-)/cytology(+)>MRI(-)/cytology(-)
1832	181.121	12.23	1	0.382979	3.96	1	MRI(-)/cytology(+)<MRI(-)/cytology(-)
1869	186.222	8.39	1	0.382979	2.74	1	MRI(-)/cytology(+)>MRI(-)/cytology(-)
1951	194.097	8.42	1	0.382979	3.14	1	MRI(-)/cytology(+)<MRI(-)/cytology(-)
2150	215.126	8.58	1	0.382979	3.775	1	MRI(-)/cytology(+)>MRI(-)/cytology(-)
2179	217.104	16	1	0.382979	5.14	1	MRI(-)/cytology(+)>MRI(-)/cytology(-)
2374	226.951	22.73	1	0.382979	4.45	1	MRI(-)/cytology(+)>MRI(-)/cytology(-)
2395	226.952	21.33	1	0.382979	3.265	1	MRI(-)/cytology(+)<MRI(-)/cytology(-)
2520	238.099	7.81	1	0.382979	2.97	1	MRI(-)/cytology(+)>MRI(-)/cytology(-)
2566	239.149	18.82	1	0.382979	4.91	1	MRI(-)/cytology(+)>MRI(-)/cytology(-)
2803	261.13	8.51	1	0.382979	4.42	1	MRI(-)/cytology(+)<MRI(-)/cytology(-)
2823	261.131	16.55	1	0.382979	5.55	1	MRI(-)/cytology(+)>MRI(-)/cytology(-)
2894	262.135	7.96	1	0.382979	2.83	1	MRI(-)/cytology(+)>MRI(-)/cytology(-)
2898	262.136	8.87	1	0.382979	3.44	1	MRI(-)/cytology(+)<MRI(-)/cytology(-)
2902	262.138	20.15	1	0.382979	4.26	1	MRI(-)/cytology(+)>MRI(-)/cytology(-)
2948	272.26	11.62	1	0.382979	3.685	1	MRI(-)/cytology(+)<MRI(-)/cytology(-)
3066	283.175	18.06	1	0.382979	4.945	1	MRI(-)/cytology(+)>MRI(-)/cytology(-)
3067	283.175	8.28	1	0.382979	3.865	1	MRI(-)/cytology(+)>MRI(-)/cytology(-)
3097	284.177	8.13	1	0.382979	2.595	1	MRI(-)/cytology(+)>MRI(-)/cytology(-)
3160	291.147	8.03	1	0.382979	2.955	1	MRI(-)/cytology(+)>MRI(-)/cytology(-)
3213	296.255	9.68	1	0.382979	4.58	1	MRI(-)/cytology(+)<MRI(-)/cytology(-)
3265	303.142	8.16	1	0.382979	3.72	1	MRI(-)/cytology(+)>MRI(-)/cytology(-)
3335	305.158	8	1	0.382979	3.195	1	MRI(-)/cytology(+)>MRI(-)/cytology(-)
3354	305.159	8.49	1	0.382979	4.185	1	MRI(-)/cytology(+)<MRI(-)/cytology(-)
3419	313.273	16.98	1	0.382979	4.6	1	MRI(-)/cytology(+)>MRI(-)/cytology(-)
3477	321.152	8.02	1	0.382979	4.615	1	MRI(-)/cytology(+)>MRI(-)/cytology(-)
3488	322.154	7.9	1	0.382979	2.945	1	MRI(-)/cytology(+)>MRI(-)/cytology(-)
3511	327.2	8.08	1	0.382979	3.365	1	MRI(-)/cytology(+)>MRI(-)/cytology(-)
3565	329.236	8.47	1	0.382979	3.62	1	MRI(-)/cytology(+)<MRI(-)/cytology(-)
3586	331.286	17.03	1	0.382979	4.12	1	MRI(-)/cytology(+)>MRI(-)/cytology(-)
3664	343.297	11.71	1	0.382979	2.82	1	MRI(-)/cytology(+)<MRI(-)/cytology(-)
3683	345.229	8.07	1	0.382979	3.945	1	MRI(-)/cytology(+)>MRI(-)/cytology(-)
3720	349.182	17.32	1	0.382979	4.795	1	MRI(-)/cytology(+)>MRI(-)/cytology(-)
3738	349.183	8.88	1	0.382979	4.19	1	MRI(-)/cytology(+)<MRI(-)/cytology(-)
3748	349.183	8.64	1	0.382979	4.335	1	MRI(-)/cytology(+)<MRI(-)/cytology(-)
3784	350.185	8.64	1	0.382979	3.55	1	MRI(-)/cytology(+)<MRI(-)/cytology(-)
3796	351.19	8.11	1	0.382979	3.61	1	MRI(-)/cytology(+)>MRI(-)/cytology(-)
3854	360.222	7.97	1	0.382979	2.6	1	MRI(-)/cytology(+)>MRI(-)/cytology(-)
3864	360.321	19.69	1	0.382979	3.19	1	MRI(-)/cytology(+)>MRI(-)/cytology(-)
3872	362.85	23.05	1	0.382979	5.13	1	MRI(-)/cytology(+)<MRI(-)/cytology(-)
3906	362.927	20.84	1	0.382979	1.665	1	MRI(-)/cytology(+)>MRI(-)/cytology(-)
3954	366.18	7.82	1	0.382979	2.395	1	MRI(-)/cytology(+)>MRI(-)/cytology(-)
3976	371.101	2.32	1	0.382979	4.91	1	MRI(-)/cytology(+)<MRI(-)/cytology(-)
4039	373.26	8.15	1	0.382979	3.39	1	MRI(-)/cytology(+)>MRI(-)/cytology(-)
4119	388.254	8.02	1	0.382979	2.49	1	MRI(-)/cytology(+)>MRI(-)/cytology(-)
4131	388.256	8.83	1	0.382979	4.49	1	MRI(-)/cytology(+)<MRI(-)/cytology(-)
4164	393.082	1.58	1	0.382979	5.215	1	MRI(-)/cytology(+)<MRI(-)/cytology(-)
4186	393.209	8.26	1	0.382979	4.61	1	MRI(-)/cytology(+)>MRI(-)/cytology(-)
4195	393.21	8.17	1	0.382979	3.505	1	MRI(-)/cytology(+)>MRI(-)/cytology(-)
4225	394.213	8.1	1	0.382979	2.525	1	MRI(-)/cytology(+)>MRI(-)/cytology(-)
4227	394.213	8.05	1	0.382979	2.48	1	MRI(-)/cytology(+)>MRI(-)/cytology(-)
4296	408.914	8.21	1	0.382979	2.25	0	MRI(-)/cytology(+)>MRI(-)/cytology(-)
4309	409.206	8.07	1	0.382979	4.23	1	MRI(-)/cytology(+)>MRI(-)/cytology(-)
4315	409.853	22.94	1	0.382979	4.43	1	MRI(-)/cytology(+)>MRI(-)/cytology(-)
4370	415.255	8.32	1	0.382979	3.6	1	MRI(-)/cytology(+)>MRI(-)/cytology(-)
4387	416.284	8.26	1	0.382979	2.81	1	MRI(-)/cytology(+)>MRI(-)/cytology(-)
4529	432.28	8.12	1	0.382979	2.62	1	MRI(-)/cytology(+)>MRI(-)/cytology(-)
4544	432.32	14.21	1	0.382979	4.57	1	MRI(-)/cytology(+)>MRI(-)/cytology(-)
4676	448.279	9.19	1	0.382979	3.49	1	MRI(-)/cytology(+)>MRI(-)/cytology(-)
4703	454.23	8.34	1	0.382979	3.325	1	MRI(-)/cytology(+)>MRI(-)/cytology(-)
4730	459.28	8.4	1	0.382979	3.505	1	MRI(-)/cytology(+)>MRI(-)/cytology(-)
4753	460.313	8.32	1	0.382979	4.68	1	MRI(-)/cytology(+)>MRI(-)/cytology(-)
4767	461.313	8.23	1	0.382979	2.735	1	MRI(-)/cytology(+)>MRI(-)/cytology(-)
4801	475.324	8.66	1	0.382979	3.56	1	MRI(-)/cytology(+)>MRI(-)/cytology(-)
4841	477.31	9.16	1	0.382979	3.82	1	MRI(-)/cytology(+)>MRI(-)/cytology(-)
4868	479.242	8.27	1	0.382979	3.545	1	MRI(-)/cytology(+)>MRI(-)/cytology(-)
4897	481.261	8.38	1	0.382979	5.31	1	MRI(-)/cytology(+)>MRI(-)/cytology(-)
4924	482.264	8.4	1	0.382979	4.705	1	MRI(-)/cytology(+)>MRI(-)/cytology(-)
4993	493.303	8.21	1	0.382979	3.81	1	MRI(-)/cytology(+)>MRI(-)/cytology(-)
5009	497.231	8.37	1	0.382979	3.12	1	MRI(-)/cytology(+)>MRI(-)/cytology(-)
5021	497.256	8.84	1	0.382979	3.9	1	MRI(-)/cytology(+)<MRI(-)/cytology(-)
5051	498.899	19.64	1	0.382979	2.87	0	MRI(-)/cytology(+)<MRI(-)/cytology(-)
5102	503.303	8.36	1	0.382979	3.015	1	MRI(-)/cytology(+)>MRI(-)/cytology(-)
5115	504.306	8.5	1	0.382979	3.695	0	MRI(-)/cytology(+)>MRI(-)/cytology(-)
5126	504.336	8.26	1	0.382979	3.735	1	MRI(-)/cytology(+)>MRI(-)/cytology(-)
5127	504.337	8.39	1	0.382979	5.365	1	MRI(-)/cytology(+)>MRI(-)/cytology(-)
5139	505.34	8.51	1	0.382979	3.495	1	MRI(-)/cytology(+)>MRI(-)/cytology(-)
5140	505.341	8.34	1	0.382979	4.78	1	MRI(-)/cytology(+)>MRI(-)/cytology(-)
5212	521.336	8.28	1	0.382979	2.595	1	MRI(-)/cytology(+)>MRI(-)/cytology(-)
5216	522.332	8.78	1	0.382979	3.305	1	MRI(-)/cytology(+)<MRI(-)/cytology(-)
5219	522.334	8.84	1	0.382979	3.13	1	MRI(-)/cytology(+)<MRI(-)/cytology(-)
5281	525.291	22.98	1	0.382979	4.55	1	MRI(-)/cytology(+)<MRI(-)/cytology(-)
5298	527.292	8.5	1	0.382979	3.86	1	MRI(-)/cytology(+)>MRI(-)/cytology(-)
5375	541.254	8.4	1	0.382979	2.43	0	MRI(-)/cytology(+)>MRI(-)/cytology(-)
5377	541.259	8.44	1	0.382979	3.69	1	MRI(-)/cytology(+)>MRI(-)/cytology(-)
5388	541.284	8.28	1	0.382979	4.335	1	MRI(-)/cytology(+)>MRI(-)/cytology(-)
5415	547.332	8.5	1	0.382979	3.59	1	MRI(-)/cytology(+)>MRI(-)/cytology(-)
5425	548.333	8.51	1	0.382979	3.115	0	MRI(-)/cytology(+)>MRI(-)/cytology(-)
5433	548.362	8.36	1	0.382979	5.33	1	MRI(-)/cytology(+)>MRI(-)/cytology(-)
5450	549.367	8.36	1	0.382979	4.345	1	MRI(-)/cytology(+)>MRI(-)/cytology(-)
5461	550.368	8.41	1	0.382979	3.73	1	MRI(-)/cytology(+)>MRI(-)/cytology(-)
5487	564.356	8.5	1	0.382979	4.72	1	MRI(-)/cytology(+)>MRI(-)/cytology(-)
5567	566.892	22.72	1	0.382979	3.945	1	MRI(-)/cytology(+)>MRI(-)/cytology(-)
5658	585.299	8.96	1	0.382979	3.21	1	MRI(-)/cytology(+)<MRI(-)/cytology(-)
5673	586.306	8.46	1	0.382979	3.895	1	MRI(-)/cytology(+)>MRI(-)/cytology(-)
5765	609.39	8.5	1	0.382979	4.08	1	MRI(-)/cytology(+)>MRI(-)/cytology(-)
5834	624.379	8.43	1	0.382979	4.075	1	MRI(-)/cytology(+)>MRI(-)/cytology(-)
5925	636.413	8.5	1	0.382979	2.78	1	MRI(-)/cytology(+)>MRI(-)/cytology(-)
5967	652.413	8.56	1	0.382979	3.655	1	MRI(-)/cytology(+)>MRI(-)/cytology(-)
5970	653.409	8.52	1	0.382979	3.475	1	MRI(-)/cytology(+)>MRI(-)/cytology(-)
6015	659.367	8.56	1	0.382979	2.88	1	MRI(-)/cytology(+)>MRI(-)/cytology(-)
6041	680.44	9.3	1	0.382979	2.78	1	MRI(-)/cytology(+)<MRI(-)/cytology(-)
6189	744.841	1.51	1	0.382979	4.29	1	MRI(-)/cytology(+)>MRI(-)/cytology(-)
6296	838.836	1.65	1	0.382979	6.13	1	MRI(-)/cytology(+)>MRI(-)/cytology(-)
6319	843.874	8.1	1	0.382979	2.73	0	MRI(-)/cytology(+)>MRI(-)/cytology(-)
6389	873.331	1.55	1	0.382979	4.445	1	MRI(-)/cytology(+)>MRI(-)/cytology(-)
6392	873.827	1.61	1	0.382979	4.63	1	MRI(-)/cytology(+)>MRI(-)/cytology(-)
6451	948.804	1.54	1	0.382979	4.67	1	MRI(-)/cytology(+)>MRI(-)/cytology(-)
6506	1042.81	1.64	1	0.382979	5.29	1	MRI(-)/cytology(+)<MRI(-)/cytology(-)
3991	371.227	8.44	0.375	1	5.97	1	MRI(-)/cytology(+)>MRI(-)/cytology(-)
370	85.0398	20.98	0.5	0.87234	2.705	1	MRI(-)/cytology(+)<MRI(-)/cytology(-)
453	91.0544	19.72	0.5	0.87234	4.12	1	MRI(-)/cytology(+)<MRI(-)/cytology(-)
467	91.0549	18.06	0.5	0.87234	3.62	1	MRI(-)/cytology(+)<MRI(-)/cytology(-)
894	118.086	2.4	0.5	0.87234	4.03	1	MRI(-)/cytology(+)>MRI(-)/cytology(-)
1255	127.094	7.89	0.5	0.87234	2.79	1	MRI(-)/cytology(+)<MRI(-)/cytology(-)
1397	138.091	22.47	0.5	0.87234	4.555	1	MRI(-)/cytology(+)>MRI(-)/cytology(-)
1491	147.077	9.62	0.5	0.87234	3.645	1	MRI(-)/cytology(+)>MRI(-)/cytology(-)
1513	153.065	7.67	0.5	0.87234	3.72	1	MRI(-)/cytology(+)<MRI(-)/cytology(-)
1535	156.012	9.63	0.5	0.87234	4.015	1	MRI(-)/cytology(+)>MRI(-)/cytology(-)
1625	165.113	8.64	0.5	0.87234	3.07	1	MRI(-)/cytology(+)<MRI(-)/cytology(-)
1827	181.073	7.78	0.5	0.87234	4.03	1	MRI(-)/cytology(+)>MRI(-)/cytology(-)
2009	200.07	8.02	0.5	0.87234	2.115	1	MRI(-)/cytology(+)<MRI(-)/cytology(-)
2446	230.14	19.03	0.5	0.87234	4.81	1	MRI(-)/cytology(+)>MRI(-)/cytology(-)
2518	238.079	9.1	0.5	0.87234	2.51	1	MRI(-)/cytology(+)>MRI(-)/cytology(-)
2717	254.061	9.63	0.5	0.87234	5.365	1	MRI(-)/cytology(+)>MRI(-)/cytology(-)
2725	255.062	9.63	0.5	0.87234	4.67	1	MRI(-)/cytology(+)>MRI(-)/cytology(-)
2742	256.055	9.66	0.5	0.87234	4.1	1	MRI(-)/cytology(+)>MRI(-)/cytology(-)
2743	256.055	9.6	0.5	0.87234	4.33	1	MRI(-)/cytology(+)>MRI(-)/cytology(-)
2750	257.06	9.62	0.5	0.87234	3.375	1	MRI(-)/cytology(+)>MRI(-)/cytology(-)
2985	276.041	9.62	0.5	0.87234	4.875	1	MRI(-)/cytology(+)>MRI(-)/cytology(-)
2996	277.044	9.63	0.5	0.87234	3.85	1	MRI(-)/cytology(+)>MRI(-)/cytology(-)
2997	277.047	9.62	0.5	0.87234	3.81	1	MRI(-)/cytology(+)>MRI(-)/cytology(-)
3064	283.175	18.3	0.5	0.87234	5.26	1	MRI(-)/cytology(+)>MRI(-)/cytology(-)
3218	297.073	9.72	0.5	0.87234	3.95	1	MRI(-)/cytology(+)>MRI(-)/cytology(-)
3307	305.157	19.97	0.5	0.87234	5.605	1	MRI(-)/cytology(+)>MRI(-)/cytology(-)
3627	338.343	19.21	0.5	0.87234	4.93	1	MRI(-)/cytology(+)>MRI(-)/cytology(-)
3726	349.182	18.18	0.5	0.87234	5.28	1	MRI(-)/cytology(+)>MRI(-)/cytology(-)
4093	384.118	8.96	0.5	0.87234	2.04	1	MRI(-)/cytology(+)<MRI(-)/cytology(-)
4105	385.18	19.48	0.5	0.87234	4.08	1	MRI(-)/cytology(+)>MRI(-)/cytology(-)
4120	388.254	7.81	0.5	0.87234	2.645	1	MRI(-)/cytology(+)>MRI(-)/cytology(-)
4189	393.209	20.04	0.5	0.87234	5.02	1	MRI(-)/cytology(+)>MRI(-)/cytology(-)
4531	432.28	8.99	0.5	0.87234	4.855	1	MRI(-)/cytology(+)>MRI(-)/cytology(-)
4613	437.235	22.65	0.5	0.87234	5.28	1	MRI(-)/cytology(+)>MRI(-)/cytology(-)
4628	437.241	9.67	0.5	0.87234	4.33	1	MRI(-)/cytology(+)<MRI(-)/cytology(-)
4697	453.23	8.01	0.5	0.87234	3.23	1	MRI(-)/cytology(+)>MRI(-)/cytology(-)
4875	479.321	8.52	0.5	0.87234	3.88	0	MRI(-)/cytology(+)>MRI(-)/cytology(-)
4961	485.288	15.66	0.5	0.87234	4.71	1	MRI(-)/cytology(+)>MRI(-)/cytology(-)
5254	525.285	22.71	0.5	0.87234	5.165	1	MRI(-)/cytology(+)>MRI(-)/cytology(-)
5403	544.34	13.31	0.5	0.87234	4.39	1	MRI(-)/cytology(+)>MRI(-)/cytology(-)
5649	584.258	19.4	0.5	0.87234	2.955	0	MRI(-)/cytology(+)>MRI(-)/cytology(-)
5675	586.313	8.49	0.5	0.87234	4.34	1	MRI(-)/cytology(+)>MRI(-)/cytology(-)
5698	592.387	9.01	0.5	0.87234	3.58	1	MRI(-)/cytology(+)<MRI(-)/cytology(-)
5819	615.346	8.89	0.5	0.87234	2.135	0	MRI(-)/cytology(+)<MRI(-)/cytology(-)
6013	659.365	9.28	0.5	0.87234	2.095	0	MRI(-)/cytology(+)>MRI(-)/cytology(-)
6159	704.863	1.52	0.5	0.87234	4.81	1	MRI(-)/cytology(+)>MRI(-)/cytology(-)
6185	740.454	9.03	0.5	0.87234	2.91	1	MRI(-)/cytology(+)<MRI(-)/cytology(-)
830	110.071	21.07	0.625	0.744681	4.1	1	MRI(-)/cytology(+)>MRI(-)/cytology(-)
1195	124.087	17.57	0.625	0.744681	5.32	1	MRI(-)/cytology(+)<MRI(-)/cytology(-)
1258	127.094	8.54	0.625	0.744681	2.91	1	MRI(-)/cytology(+)<MRI(-)/cytology(-)
1334	136.047	1.78	0.625	0.744681	4.415	1	MRI(-)/cytology(+)<MRI(-)/cytology(-)
1487	146.06	7.67	0.625	0.744681	2.72	1	MRI(-)/cytology(+)>MRI(-)/cytology(-)
1506	151.048	1.92	0.625	0.744681	4.58	1	MRI(-)/cytology(+)>MRI(-)/cytology(-)
1533	155.973	23.56	0.625	0.744681	5.17	1	MRI(-)/cytology(+)<MRI(-)/cytology(-)
1534	155.974	23.45	0.625	0.744681	5.07	1	MRI(-)/cytology(+)<MRI(-)/cytology(-)
1789	174.185	9.84	0.625	0.744681	2.305	1	MRI(-)/cytology(+)<MRI(-)/cytology(-)
1810	175.119	1.61	0.625	0.744681	4.815	1	MRI(-)/cytology(+)>MRI(-)/cytology(-)
1821	181.07	8.62	0.625	0.744681	3.33	1	MRI(-)/cytology(+)<MRI(-)/cytology(-)
2111	214.252	20.14	0.625	0.744681	3.675	1	MRI(-)/cytology(+)>MRI(-)/cytology(-)
2129	214.254	22.32	0.625	0.744681	4.05	1	MRI(-)/cytology(+)>MRI(-)/cytology(-)
2164	217.104	18.13	0.625	0.744681	5.475	1	MRI(-)/cytology(+)>MRI(-)/cytology(-)
2503	235.169	14.38	0.625	0.744681	4.1	1	MRI(-)/cytology(+)<MRI(-)/cytology(-)
2505	235.179	8.03	0.625	0.744681	3.82	1	MRI(-)/cytology(+)<MRI(-)/cytology(-)
2560	239.148	18.19	0.625	0.744681	5.3	1	MRI(-)/cytology(+)>MRI(-)/cytology(-)
3069	283.175	9.7	0.625	0.744681	4.03	1	MRI(-)/cytology(+)<MRI(-)/cytology(-)
3246	301.14	18.83	0.625	0.744681	4.46	1	MRI(-)/cytology(+)>MRI(-)/cytology(-)
3490	322.154	8.64	0.625	0.744681	3.075	1	MRI(-)/cytology(+)<MRI(-)/cytology(-)
3560	329.231	12.99	0.625	0.744681	4.49	1	MRI(-)/cytology(+)>MRI(-)/cytology(-)
4062	378.899	1.57	0.625	0.744681	5.24	1	MRI(-)/cytology(+)>MRI(-)/cytology(-)
4144	389.258	8.09	0.625	0.744681	4.51	1	MRI(-)/cytology(+)>MRI(-)/cytology(-)
4177	393.208	8.06	0.625	0.744681	3.12	1	MRI(-)/cytology(+)>MRI(-)/cytology(-)
4353	414.054	9.64	0.625	0.744681	2.54	1	MRI(-)/cytology(+)>MRI(-)/cytology(-)
4409	417.288	8.06	0.625	0.744681	2.465	1	MRI(-)/cytology(+)>MRI(-)/cytology(-)
4545	432.853	22.97	0.625	0.744681	4.17	1	MRI(-)/cytology(+)<MRI(-)/cytology(-)
4995	493.307	8.44	0.625	0.744681	3.585	1	MRI(-)/cytology(+)<MRI(-)/cytology(-)
5055	498.9	22.33	0.625	0.744681	5.16	1	MRI(-)/cytology(+)>MRI(-)/cytology(-)
5160	509.213	9.26	0.625	0.744681	1.885	1	MRI(-)/cytology(+)<MRI(-)/cytology(-)
5317	528.307	8.95	0.625	0.744681	1.865	0	MRI(-)/cytology(+)<MRI(-)/cytology(-)
5391	541.813	22.98	0.625	0.744681	3.98	1	MRI(-)/cytology(+)<MRI(-)/cytology(-)
5454	550.199	10.34	0.625	0.744681	1.75	0	MRI(-)/cytology(+)<MRI(-)/cytology(-)
5486	564.356	8.68	0.625	0.744681	6.37	1	MRI(-)/cytology(+)>MRI(-)/cytology(-)
5613	571.315	9.05	0.625	0.744681	2.975	1	MRI(-)/cytology(+)>MRI(-)/cytology(-)
5635	580.351	8.56	0.625	0.744681	4.945	1	MRI(-)/cytology(+)>MRI(-)/cytology(-)
5818	615.345	8.92	0.625	0.744681	2.42	0	MRI(-)/cytology(+)<MRI(-)/cytology(-)
5893	634.876	22.38	0.625	0.744681	5.17	1	MRI(-)/cytology(+)>MRI(-)/cytology(-)
6086	697.441	8.76	0.625	0.744681	4.64	1	MRI(-)/cytology(+)>MRI(-)/cytology(-)
6102	702.393	8.75	0.625	0.744681	4.44	1	MRI(-)/cytology(+)>MRI(-)/cytology(-)
6107	702.397	10	0.625	0.744681	1.74	0	MRI(-)/cytology(+)<MRI(-)/cytology(-)
6148	702.865	22.39	0.625	0.744681	5.01	0	MRI(-)/cytology(+)>MRI(-)/cytology(-)
6310	838.841	22.39	0.625	0.744681	4.81	0	MRI(-)/cytology(+)>MRI(-)/cytology(-)
28	56.0526	18.95	0.75	0.617021	3.95	1	MRI(-)/cytology(+)<MRI(-)/cytology(-)
36	56.9673	1.37	0.75	0.617021	4.76	1	MRI(-)/cytology(+)>MRI(-)/cytology(-)
66	59.0516	8.18	0.75	0.617021	4.81	1	MRI(-)/cytology(+)<MRI(-)/cytology(-)
298	82.0535	18.26	0.75	0.617021	3.425	1	MRI(-)/cytology(+)<MRI(-)/cytology(-)
308	82.0537	17.6	0.75	0.617021	3.01	1	MRI(-)/cytology(+)<MRI(-)/cytology(-)
397	85.0409	16.11	0.75	0.617021	2.59	1	MRI(-)/cytology(+)<MRI(-)/cytology(-)
758	103.054	7.94	0.75	0.617021	2.92	1	MRI(-)/cytology(+)<MRI(-)/cytology(-)
910	120.08	8.01	0.75	0.617021	3.09	1	MRI(-)/cytology(+)<MRI(-)/cytology(-)
912	120.08	7.94	0.75	0.617021	3.365	1	MRI(-)/cytology(+)<MRI(-)/cytology(-)
913	120.08	8.02	0.75	0.617021	3.06	1	MRI(-)/cytology(+)<MRI(-)/cytology(-)
919	120.081	7.66	0.75	0.617021	3.47	1	MRI(-)/cytology(+)>MRI(-)/cytology(-)
924	121.082	7.86	0.75	0.617021	3.75	1	MRI(-)/cytology(+)<MRI(-)/cytology(-)
979	122.097	19.48	0.75	0.617021	4.42	1	MRI(-)/cytology(+)>MRI(-)/cytology(-)
1021	123.079	18.06	0.75	0.617021	5.035	1	MRI(-)/cytology(+)<MRI(-)/cytology(-)
1161	124.087	19.21	0.75	0.617021	5.605	1	MRI(-)/cytology(+)<MRI(-)/cytology(-)
1710	171.113	8.33	0.75	0.617021	3.25	1	MRI(-)/cytology(+)<MRI(-)/cytology(-)
1735	173.077	8.12	0.75	0.617021	4.05	1	MRI(-)/cytology(+)<MRI(-)/cytology(-)
1741	173.077	8.11	0.75	0.617021	4.07	1	MRI(-)/cytology(+)<MRI(-)/cytology(-)
1742	173.077	8.14	0.75	0.617021	3.91	1	MRI(-)/cytology(+)<MRI(-)/cytology(-)
2114	214.252	10.5	0.75	0.617021	4.04	1	MRI(-)/cytology(+)<MRI(-)/cytology(-)
2167	217.104	18.98	0.75	0.617021	5.34	1	MRI(-)/cytology(+)>MRI(-)/cytology(-)
2237	217.105	18.87	0.75	0.617021	5.61	1	MRI(-)/cytology(+)>MRI(-)/cytology(-)
2262	218.107	7.83	0.75	0.617021	3.74	1	MRI(-)/cytology(+)>MRI(-)/cytology(-)
2318	220.068	8.89	0.75	0.617021	2.16	0	MRI(-)/cytology(+)<MRI(-)/cytology(-)
2342	223.99	22.87	0.75	0.617021	4.23	1	MRI(-)/cytology(+)<MRI(-)/cytology(-)
2480	233.098	8.3	0.75	0.617021	3.785	1	MRI(-)/cytology(+)<MRI(-)/cytology(-)
2695	249.16	8.28	0.75	0.617021	3.92	1	MRI(-)/cytology(+)>MRI(-)/cytology(-)
2779	259.125	11.6	0.75	0.617021	3.74	1	MRI(-)/cytology(+)<MRI(-)/cytology(-)
2836	261.131	17.16	0.75	0.617021	5.39	1	MRI(-)/cytology(+)>MRI(-)/cytology(-)
2892	262.135	8.42	0.75	0.617021	3.64	1	MRI(-)/cytology(+)<MRI(-)/cytology(-)
2918	264.032	9.66	0.75	0.617021	2.39	1	MRI(-)/cytology(+)<MRI(-)/cytology(-)
3001	277.125	7.81	0.75	0.617021	3.895	1	MRI(-)/cytology(+)>MRI(-)/cytology(-)
3058	283.174	8.73	0.75	0.617021	3.83	1	MRI(-)/cytology(+)<MRI(-)/cytology(-)
3081	283.176	19.58	0.75	0.617021	4.89	1	MRI(-)/cytology(+)>MRI(-)/cytology(-)
3130	285.21	8.03	0.75	0.617021	4.3	1	MRI(-)/cytology(+)>MRI(-)/cytology(-)
3158	291.146	7.74	0.75	0.617021	2.87	1	MRI(-)/cytology(+)>MRI(-)/cytology(-)
3219	297.074	9.69	0.75	0.617021	3.325	1	MRI(-)/cytology(+)<MRI(-)/cytology(-)
3261	303.141	8.51	0.75	0.617021	3.265	1	MRI(-)/cytology(+)<MRI(-)/cytology(-)
3370	306.16	8.49	0.75	0.617021	3.18	1	MRI(-)/cytology(+)<MRI(-)/cytology(-)
3481	321.153	8.42	0.75	0.617021	3.91	1	MRI(-)/cytology(+)<MRI(-)/cytology(-)
3507	327.079	8.12	0.75	0.617021	3.97	1	MRI(-)/cytology(+)<MRI(-)/cytology(-)
3589	333.277	16.35	0.75	0.617021	5.08	1	MRI(-)/cytology(+)>MRI(-)/cytology(-)
3657	340.932	1.47	0.75	0.617021	4.38	1	MRI(-)/cytology(+)<MRI(-)/cytology(-)
3847	359.09	1.89	0.75	0.617021	4.71	1	MRI(-)/cytology(+)>MRI(-)/cytology(-)
3953	366.18	8.46	0.75	0.617021	3.6	1	MRI(-)/cytology(+)<MRI(-)/cytology(-)
4184	393.209	18.95	0.75	0.617021	4.795	1	MRI(-)/cytology(+)>MRI(-)/cytology(-)
4617	437.236	8.88	0.75	0.617021	4.64	1	MRI(-)/cytology(+)<MRI(-)/cytology(-)
4670	448.275	9.05	0.75	0.617021	3.59	1	MRI(-)/cytology(+)>MRI(-)/cytology(-)
4844	477.312	8.2	0.75	0.617021	4.36	1	MRI(-)/cytology(+)>MRI(-)/cytology(-)
4990	493.298	8.84	0.75	0.617021	2.585	1	MRI(-)/cytology(+)<MRI(-)/cytology(-)
5078	498.902	1.6	0.75	0.617021	6	1	MRI(-)/cytology(+)>MRI(-)/cytology(-)
5138	505.339	8.77	0.75	0.617021	3.59	1	MRI(-)/cytology(+)<MRI(-)/cytology(-)
5270	525.288	19.5	0.75	0.617021	4.3	1	MRI(-)/cytology(+)>MRI(-)/cytology(-)
5288	526.291	13.28	0.75	0.617021	4.765	1	MRI(-)/cytology(+)>MRI(-)/cytology(-)
5504	565.367	9.41	0.75	0.617021	3.62	1	MRI(-)/cytology(+)>MRI(-)/cytology(-)
5627	572.323	8.79	0.75	0.617021	2.05	0	MRI(-)/cytology(+)<MRI(-)/cytology(-)
6019	659.373	8.53	0.75	0.617021	2.855	0	MRI(-)/cytology(+)>MRI(-)/cytology(-)
6071	696.436	10.02	0.75	0.617021	2.63	1	MRI(-)/cytology(+)<MRI(-)/cytology(-)
6149	702.867	20	0.75	0.617021	1.64	0	MRI(-)/cytology(+)>MRI(-)/cytology(-)
6256	795.79	19.21	0.75	0.617021	3.59	0	MRI(-)/cytology(+)>MRI(-)/cytology(-)
6341	853.727	17.9	0.75	0.617021	4.07	1	MRI(-)/cytology(+)>MRI(-)/cytology(-)
6521	1076.79	1.66	0.75	0.617021	4.7	1	MRI(-)/cytology(+)<MRI(-)/cytology(-)
94	59.0517	17.65	0.875	0.489362	4.25	1	MRI(-)/cytology(+)<MRI(-)/cytology(-)
199	68.9846	1.33	0.875	0.489362	5.32	1	MRI(-)/cytology(+)>MRI(-)/cytology(-)
225	69.9851	1.33	0.875	0.489362	4.49	1	MRI(-)/cytology(+)>MRI(-)/cytology(-)
230	70.981	1.33	0.875	0.489362	4.52	1	MRI(-)/cytology(+)>MRI(-)/cytology(-)
256	73.0658	2.27	0.875	0.489362	5.01	1	MRI(-)/cytology(+)>MRI(-)/cytology(-)
303	82.0536	18.06	0.875	0.489362	3.865	1	MRI(-)/cytology(+)<MRI(-)/cytology(-)
333	82.0541	22.26	0.875	0.489362	3.545	1	MRI(-)/cytology(+)<MRI(-)/cytology(-)
369	85.0395	17.55	0.875	0.489362	3.32	1	MRI(-)/cytology(+)<MRI(-)/cytology(-)
393	85.0408	21.45	0.875	0.489362	3.25	1	MRI(-)/cytology(+)<MRI(-)/cytology(-)
404	85.0411	17.72	0.875	0.489362	2.76	1	MRI(-)/cytology(+)<MRI(-)/cytology(-)
435	88.9906	1.33	0.875	0.489362	4.17	1	MRI(-)/cytology(+)>MRI(-)/cytology(-)
801	106.079	19.23	0.875	0.489362	4.65	1	MRI(-)/cytology(+)<MRI(-)/cytology(-)
837	110.071	22.19	0.875	0.489362	3.94	1	MRI(-)/cytology(+)>MRI(-)/cytology(-)
987	122.097	20.13	0.875	0.489362	4.34	1	MRI(-)/cytology(+)>MRI(-)/cytology(-)
1146	124.087	21.62	0.875	0.489362	4.79	1	MRI(-)/cytology(+)<MRI(-)/cytology(-)
1173	124.087	16.89	0.875	0.489362	5.72	1	MRI(-)/cytology(+)<MRI(-)/cytology(-)
1371	136.113	20.64	0.875	0.489362	3.91	1	MRI(-)/cytology(+)<MRI(-)/cytology(-)
1451	143	22.93	0.875	0.489362	5.09	1	MRI(-)/cytology(+)>MRI(-)/cytology(-)
1468	144.174	7.79	0.875	0.489362	1.9	1	MRI(-)/cytology(+)>MRI(-)/cytology(-)
1511	152.07	8.51	0.875	0.489362	3.01	0	MRI(-)/cytology(+)<MRI(-)/cytology(-)
1605	161.096	10.12	0.875	0.489362	3.83	1	MRI(-)/cytology(+)<MRI(-)/cytology(-)
1633	166.085	7.65	0.875	0.489362	3.53	1	MRI(-)/cytology(+)>MRI(-)/cytology(-)
1635	166.085	7.66	0.875	0.489362	3.64	1	MRI(-)/cytology(+)>MRI(-)/cytology(-)
1637	166.086	7.83	0.875	0.489362	3.7	1	MRI(-)/cytology(+)>MRI(-)/cytology(-)
1679	167.069	13.42	0.875	0.489362	3.79	1	MRI(-)/cytology(+)<MRI(-)/cytology(-)
1776	173.079	18.09	0.875	0.489362	4.55	1	MRI(-)/cytology(+)>MRI(-)/cytology(-)
1890	189.072	7.66	0.875	0.489362	3.54	1	MRI(-)/cytology(+)>MRI(-)/cytology(-)
1950	194.097	8.18	0.875	0.489362	3.09	1	MRI(-)/cytology(+)>MRI(-)/cytology(-)
2043	202.971	1.37	0.875	0.489362	3.82	1	MRI(-)/cytology(+)>MRI(-)/cytology(-)
2064	205.095	7.66	0.875	0.489362	3.625	1	MRI(-)/cytology(+)<MRI(-)/cytology(-)
2105	214.251	19.44	0.875	0.489362	3.49	1	MRI(-)/cytology(+)>MRI(-)/cytology(-)
2481	233.099	8.52	0.875	0.489362	3.8	1	MRI(-)/cytology(+)<MRI(-)/cytology(-)
2535	239.127	8.64	0.875	0.489362	3.75	1	MRI(-)/cytology(+)>MRI(-)/cytology(-)
2536	239.127	8.91	0.875	0.489362	3.77	1	MRI(-)/cytology(+)<MRI(-)/cytology(-)
2606	240.179	8.86	0.875	0.489362	3.21	1	MRI(-)/cytology(+)>MRI(-)/cytology(-)
2612	240.181	8.38	0.875	0.489362	3.105	1	MRI(-)/cytology(+)<MRI(-)/cytology(-)
2652	247.166	20.1	0.875	0.489362	3.66	1	MRI(-)/cytology(+)>MRI(-)/cytology(-)
2677	248.166	8.08	0.875	0.489362	2.66	1	MRI(-)/cytology(+)>MRI(-)/cytology(-)
2747	256.852	23.49	0.875	0.489362	5.23	1	MRI(-)/cytology(+)>MRI(-)/cytology(-)
2800	261.13	22.7	0.875	0.489362	5.39	1	MRI(-)/cytology(+)>MRI(-)/cytology(-)
3042	281.247	13.36	0.875	0.489362	4.82	1	MRI(-)/cytology(+)<MRI(-)/cytology(-)
3128	285.208	7.67	0.875	0.489362	2.86	1	MRI(-)/cytology(+)<MRI(-)/cytology(-)
3168	292.146	7.74	0.875	0.489362	2.46	1	MRI(-)/cytology(+)>MRI(-)/cytology(-)
3274	303.312	10.49	0.875	0.489362	4.91	1	MRI(-)/cytology(+)<MRI(-)/cytology(-)
3396	308.116	8.81	0.875	0.489362	2.64	0	MRI(-)/cytology(+)<MRI(-)/cytology(-)
3529	328.207	8.77	0.875	0.489362	3.31	1	MRI(-)/cytology(+)<MRI(-)/cytology(-)
3802	351.198	8.72	0.875	0.489362	4.4	1	MRI(-)/cytology(+)<MRI(-)/cytology(-)
3944	365.178	8.72	0.875	0.489362	3.875	1	MRI(-)/cytology(+)<MRI(-)/cytology(-)
3965	367.149	7.77	0.875	0.489362	2.735	1	MRI(-)/cytology(+)>MRI(-)/cytology(-)
3967	368.127	7.95	0.875	0.489362	2.7	1	MRI(-)/cytology(+)>MRI(-)/cytology(-)
4000	371.26	8.61	0.875	0.489362	2.96	1	MRI(-)/cytology(+)<MRI(-)/cytology(-)
4034	373.237	8.2	0.875	0.489362	3.02	1	MRI(-)/cytology(+)>MRI(-)/cytology(-)
4218	394.21	8.68	0.875	0.489362	3.57	1	MRI(-)/cytology(+)<MRI(-)/cytology(-)
4222	394.212	9.81	0.875	0.489362	3.54	1	MRI(-)/cytology(+)<MRI(-)/cytology(-)
4278	404.247	8.75	0.875	0.489362	3.79	1	MRI(-)/cytology(+)<MRI(-)/cytology(-)
4279	404.247	8.52	0.875	0.489362	3.81	1	MRI(-)/cytology(+)<MRI(-)/cytology(-)
4393	416.286	8.83	0.875	0.489362	4.115	1	MRI(-)/cytology(+)<MRI(-)/cytology(-)
4747	460.311	8.23	0.875	0.489362	2.725	1	MRI(-)/cytology(+)>MRI(-)/cytology(-)
4821	476.306	17.22	0.875	0.489362	4.98	1	MRI(-)/cytology(+)>MRI(-)/cytology(-)
4852	478.309	8.82	0.875	0.489362	3.1	1	MRI(-)/cytology(+)<MRI(-)/cytology(-)
5045	498.899	20.05	0.875	0.489362	1.595	0	MRI(-)/cytology(+)>MRI(-)/cytology(-)
5109	503.306	9.07	0.875	0.489362	4.18	1	MRI(-)/cytology(+)>MRI(-)/cytology(-)
5414	547.331	9.4	0.875	0.489362	3.72	1	MRI(-)/cytology(+)<MRI(-)/cytology(-)
5417	547.332	8.8	0.875	0.489362	4.1	1	MRI(-)/cytology(+)<MRI(-)/cytology(-)
5470	559.13	17.32	0.875	0.489362	4.145	1	MRI(-)/cytology(+)>MRI(-)/cytology(-)
5513	566.363	8.41	0.875	0.489362	3.035	0	MRI(-)/cytology(+)>MRI(-)/cytology(-)
5582	569.31	8.8	0.875	0.489362	4.49	1	MRI(-)/cytology(+)<MRI(-)/cytology(-)
[truncated: 5,341 more rows]
